# Supplementary material for: Synthesis of a fused N-bridged [3.3.1]nonadiquinoline multicyclic skeleton via a metal-free formal [4 + 2] cycloaddition/Mannich/dearomatization domino reaction
Source: Royal Society of Chemistry journal article supplement (doi:10.1039/d3gc03026a), 2023-01-01
Supplement: d3gc03026a1.pdf [file d3gc03026a1.pdf]

## ***Supporting Information***

### **Synthesis of Fused *N*-Bridged [3.3.1]nonadiquinoline Multicyclic Skeleton *via* Metal-Free Formal [4+2] Cycloaddition/ Mannich/ Dearomatization Domino Reaction**

Kamran Amiri,<sup>a</sup> Behrouz Nayebzadeh,<sup>a</sup> Mohammad Kamangar,<sup>a</sup> Mohammad Babazadeh,<sup>a</sup> Alireza Ariaifard,<sup>b,c</sup> Farshad Shiri,<sup>b</sup> Frank Rominger<sup>d</sup> and Saeed Balalaie\*<sup>a</sup>

<sup>a</sup>Peptide Chemistry Research Institute, K. N. Toosi University of Technology, P. O. Box 15875-4416, Tehran, Iran, Balalaie@kntu.ac.ir

<sup>b</sup>Department of Chemistry, Islamic Azad University, Central Tehran Branch, Poonak, Tehran 1469669191, Iran

<sup>c</sup>Research School of Chemistry, The Australian National University, Canberra, ACT 0200, Australia

<sup>d</sup>Organisch-Chemisches Institut der Universität Heidelberg, Im Neuenheimer Feld 271, D-69120 Heidelberg, Germany

## Table of Contents

|                                                                                           |      |
|-------------------------------------------------------------------------------------------|------|
| 1 General information                                                                     | S3   |
| 2 General Procedure for the synthesis of fused azabicyclo[3.3.1]nonadiquinoline skeletons | S3   |
| 3 Procedure for the scale-up reaction for the synthesis of compound <b>3a</b>             | S3   |
| 4 Procedure for the synthesis of the asymmetric structural product compound               | S4   |
| 5 Characterization spectra of products                                                    | S5   |
| 6 <sup>1</sup> H NMR, <sup>13</sup> C NMR, and HRMS- ESI spectra of products              | S17  |
| 7 Crystallographic data for compound <b>3e</b>                                            | S87  |
| 8 Computational details                                                                   | S95  |
| 9 References                                                                              | S114 |

## General Information

All reagents were purchased from commercials including TCI, Alfa Aesar, and Sigma-Aldrich (Merck), and were used without further purification. Melting points (m.p.) were determined in capillary tubes with an Electrothermal 9100 digital melting point apparatus and are uncorrected. All experiments were monitored by thin layer chromatography (TLC Silica Gel 60 F<sub>254</sub>) plate was visualized under UV light at 254 nm for UV active materials. All <sup>1</sup>H NMR and <sup>13</sup>C NMR spectra were recorded using 400, 300, and 250 MHz Bruker spectrometers. The chemical shifts ( $\delta$ ) were reported in parts per million (ppm) and also coupling constants ( $J$ ) are reported in Hertz (Hz). Multiplicities are indicated as s = singlet, br s = broad singlet, d = doublet, t = triplet, q = quartet, m = multiplet. High-resolution ESI-MS (HRMS-ESI) data were obtained using a Waters LCT Premier XE™ TOF (Time of Flight) mass spectrometer in positive ionization mode. Merck silica gel 60® (230-400 mesh) was used for column chromatography. Single-crystal X-ray diffraction data were collected on a Bruker APEX-II Quazar area detector at room temperature. The ratio of the products was determined by the analytical HPLC (Rigol L3400 Column Aven).

## General procedure for the synthesis of fused azabicyclo[3.3.1]nonadiquinoline skeletons (3a-ag)

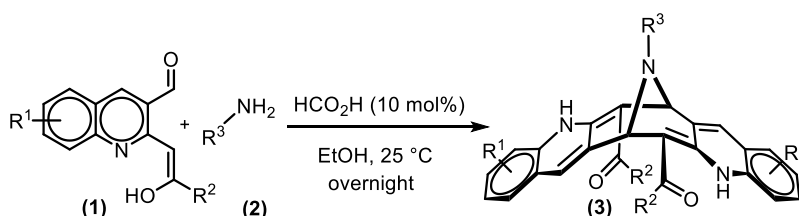

To a round bottom flask, a solution of enolized-*o*-alkenylquinoline carbaldehyde<sup>1</sup> **1** (0.2 mmol) and amine **2** (0.1 mmol) in EtOH (2.0 mL) was added formic acid (10 mol%) at 25 °C overnight. After the completion of the reactions (monitored by TLC), the solution was then concentrated under reduced pressure and the resulting residue was purified by column chromatography on silica gel (*n*-hexane/ethyl acetate) to obtain the desired product **3a-ag**.

## Procedure for the scale-up reaction for the synthesis of compound 3a:

## Supporting Information

To a round bottom flask, a solution of (Z)-2-(2-hydroxy-2-phenylvinyl)quinoline-3-carbaldehyde **1a** (4 mmol, 2 equiv.) and aniline **2a** (2 mmol, 1 equiv.) in EtOH (20.0 mL) was added formic acid (10 mol%) at 25 °C overnight. After the completion of the reactions (monitored by TLC), the solution was then concentrated under reduced pressure, and the resulting residue was purified by column chromatography on silica gel (*n*-hexane/ethyl acetate= 3/1) to obtain the desired product **3a** (80%).

### Procedure for the synthesis of the asymmetric structural product compound

To a round bottom flask, a solution of (Z)-2-(2-hydroxy-2-phenylvinyl)-6-isopropylquinoline-3-carbaldehyde (0.1 mmol), (Z)-2-(2-hydroxy-2-phenylvinyl)quinoline-3-carbaldehyde (0.1 mmol) and 4-fluoroaniline (0.1 mmol) in EtOH (2.0 mL) was added formic acid (10 mol%) at 25 °C overnight. After the completion of the reactions (monitored by TLC), the solution was then concentrated under reduced pressure, but the products were not separated by column chromatography, because of their similar polarity. Therefore, the type, and ratio of the products were determined by the analytical HPLC chromatogram and Mass spectrometry. At first, the crud of the reaction was characterized by Mass and analytical HPLC techniques. Subsequently, analytical HPLC yielded three fractions, and the chemical structure of the purified compounds was determined by mass spectrometry. Based on the obtained results, the yield of the desired product **3ah** was 37%.

**((7R,15S)-17-Phenyl-5,7,13,15-tetrahydro-7,15-epiminocycloocta[1,2-b:5,6-b']diquinoline-6,14-diyl)bis(phenylmethanone) (3a)**

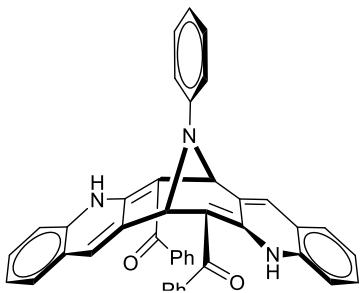

Yellow solid (56 mg, Yield 92%, m.p. 195-198 °C), (*n*-hexane/EtOAc = 3:1, R<sub>f</sub> = 0.3); <sup>1</sup>H NMR (400 MHz, CDCl<sub>3</sub>) δ 7.71 – 7.61 (m, 7H), 7.56 – 7.45 (m, 7H), 7.40 (d, *J* = 8.2 Hz, 2H), 7.31 (t, *J* = 8.2 Hz, 2H), 7.23 (t, *J* = 7.5 Hz, 2H), 7.19 – 7.13 (m, 4H), 6.92 (t, *J* = 7.8 Hz, 1H), 6.15 (s, 2H), 6.01 (s, 2H); <sup>13</sup>C{<sup>1</sup>H} NMR (101 MHz, CDCl<sub>3</sub>) δ 187.6, 150.1, 148.5, 141.8, 136.1, 130.6, 130.5, 130.4, 129.4, 129.1, 129.0, 127.3, 127.2, 124.0, 122.9, 120.9, 118.1, 117.9, 99.3, 56.1; HRMS-ESI (*m/z*): [M + H]<sup>+</sup> calcd for C<sub>42</sub>H<sub>29</sub>N<sub>3</sub>O<sub>2</sub> 608.2330; found: 608.2334.

**((7S)-17-Tosyl-5,7,13,15-tetrahydro-7,15-epiminocycloocta[1,2-b:5,6-b']diquinoline-6,14-diyl)bis(phenylmethanone) (3b)**

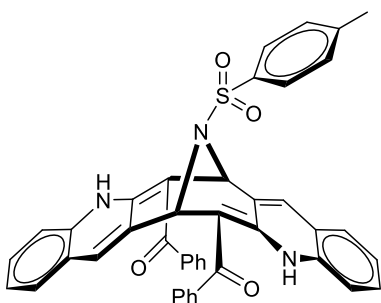

Yellow solid (50 mg, Yield 73%, m.p. 227-231 °C), (*n*-hexane/EtOAc = 3:1, R<sub>f</sub> = 0.3); <sup>1</sup>H NMR (250 MHz, CDCl<sub>3</sub>) δ 7.68 – 7.51 (m, 9H), 7.51 – 7.43 (m, 5H), 7.42 (s, 1H), 7.38 (s, 1H), 7.15 (d, *J* = 2.8 Hz, 1H), 7.12 (d, *J* = 2.7 Hz, 1H), 7.09 – 6.97 (m, 3H), 6.96 (s, 1H), 6.55 (d, *J* = 2.7 Hz, 2H), 6.09 (s, 2H), 6.00 (s, 2H), 1.25 (s, 3H). <sup>13</sup>C{<sup>1</sup>H} NMR (63 MHz, CDCl<sub>3</sub>) δ 182.0, 156.4, 149.5, 145.2, 141.0, 132.4, 131.0, 130.4, 129.0, 127.5, 124.4, 122.3, 120.8, 120.1, 120.0, 116.1, 115.7, 107.5, 99.6, 56.9, 29.7.; HRMS-ESI (*m/z*): [M + H]<sup>+</sup> calcd for C<sub>43</sub>H<sub>31</sub>N<sub>3</sub>O<sub>4</sub>S 686.2114; found: 686.2122.

**((7R,15S)-17B-5,7,13,15-Tetrahydro-7,15-epiminocycloocta[1,2-b:5,6-b']diquinoline-6,14-diyl)bis(phenylmethanone) (3c)**

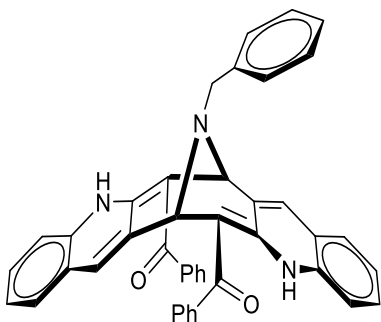

Yellow solid (49 mg, Yield 79%, m.p. 314-317 °C), (*n*-hexane/EtOAc = 3:1, R<sub>f</sub> = 0.3); <sup>1</sup>H NMR (250 MHz, CDCl<sub>3</sub>) δ 7.49 – 7.36 (m, 18H), 7.24 – 7.10 (m, 7H), 5.94 (s, 2H), 5.26 (s, 2H), 3.92 – 3.70 (m, 2H). <sup>13</sup>C{<sup>1</sup>H} NMR (63 MHz, CDCl<sub>3</sub>) δ 187.7, 150.0, 141.5, 138.0, 137.6, 136.3, 130.8, 130.4, 130.0, 129.3, 128.9, 128.6, 127.7, 127.4, 127.2, 123.9, 123.1, 118.0, 98.8, 56.4, 29.7.; HRMS-ESI (*m/z*): [M + H]<sup>+</sup> calcd for C<sub>43</sub>H<sub>31</sub>N<sub>3</sub>O<sub>2</sub> 622.2495; found: 622.2507.

**((7R,15S)-17-Cyclohexyl-5,7,13,15-tetrahydro-7,15-epiminocycloocta[1,2-b:5,6-b']diquinoline-6,14-diyl)bis(phenylmethanone) (3d)**

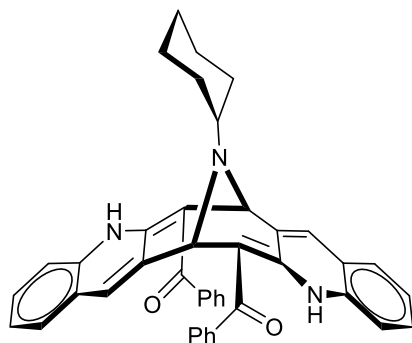

Yellow solid (49 mg, Yield 81%, m.p. 212-215 °C), (*n*-hexane/EtOAc = 4:1, R<sub>f</sub> = 0.3); <sup>1</sup>H NMR (300 MHz, CDCl<sub>3</sub>) δ 7.75-7.55 (m, 7H), 7.54-7.35 (m, 9H), 7.23 (t, *J* = 7.4 Hz, 2H), 7.16 (d, *J* = 7.5 Hz, 2H), 5.93 (br s, 2H), 5.58 (br s, 2H), 2.48-2.37 (m, 1H), 2.34-2.24 (m, 1H), 2.03 – 1.90 (m, 2H), 1.87 – 1.78 (m, 1H), 1.72-1.61 (m, 1H), 1.48 – 1.34 (m, 2H), 1.28-1.16 (m, 1H), 0.96 – 0.86 (m, 2H).; <sup>13</sup>C{<sup>1</sup>H} NMR (76 MHz, CDCl<sub>3</sub>) δ 188.3, 150.3, 142.1, 136.1, 130.8, 130.3, 130.2, 129.0, 128.9, 127.3, 127.2, 123.8, 123.0, 117.8, 99.0, 56.4, 53.5, 31.5, 30.6, 25.9, 25.2, 25.1; HRMS-ESI (*m/z*): [M + H]<sup>+</sup> calcd for C<sub>42</sub>H<sub>36</sub>N<sub>3</sub>O<sub>2</sub> 614.2805; found: 614.2808.

**((7R,15S)-17-(2-(phenylethynyl)phenyl)-5,7,13,15-tetrahydro-7,15-epiminocycloocta[1,2-b:5,6-b']diquinoline-6,14-diyl)bis(phenylmethanone) (3e)**

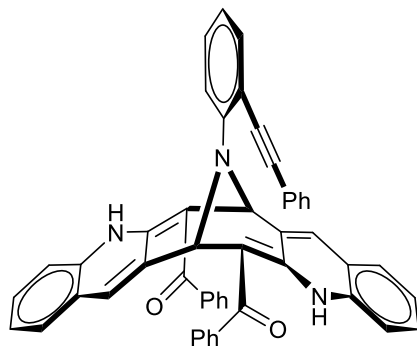

Yellow solid (53 mg, Yield 75%, m.p. 269-271 °C), (*n*-hexane/EtOAc = 3:1, R<sub>f</sub> = 0.3); <sup>1</sup>H NMR (300 MHz, CDCl<sub>3</sub>) δ 7.56 (d, *J* = 7.6 Hz, 1H), 7.49 – 7.41 (m, 7H), 7.40 – 7.31 (m, 8H), 7.23 – 7.02 (m, 9H), 6.99 – 6.94 (m, 3H), 6.89 (d, *J* = 8.2 Hz, 1H), 6.28 (s, 2H), 5.77 (s, 2H); <sup>13</sup>C NMR (75 MHz, CDCl<sub>3</sub>) δ 187.4, 151.1, 150.2, 141.7, 136.2, 134.5, 131.6, 131.4, 131.0, 130.4, 130.1, 129.6, 128.9, 128.8, 128.2, 128.1, 127.4, 127.3, 123.9, 123.2, 122.9, 122.2, 119.1, 118.0, 116.8, 99.8, 95.9, 88.1, 56.7; HRMS-ESI (*m/z*): [M + H]<sup>+</sup> calcd for C<sub>50</sub>H<sub>33</sub>N<sub>3</sub>O<sub>2</sub> 708.2645; found: 708.2646.

**((7R,15S)-17-(4-Chlorophenyl)-5,7,13,15-tetrahydro-7,15-epiminocycloocta[1,2-b:5,6-b']diquinoline-6,14-diyl)bis(phenylmethanone) (3f)**

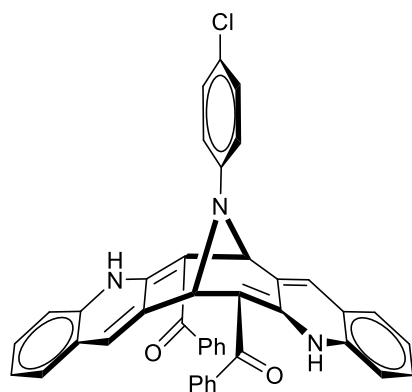

Yellow solid (58 mg, Yield 91%, m.p. 216-219 °C), (*n*-hexane/EtOAc = 3:1, R<sub>f</sub> = 0.3); <sup>1</sup>H NMR (300 MHz, CDCl<sub>3</sub>) δ 7.77 – 7.60 (m, 7H), 7.57 – 7.45 (m, 7H), 7.41 (d, *J* = 8.2 Hz, 2H), 7.31 – 7.22 (m, 4H), 7.18 (d, *J* = 7.8 Hz, 2H), 7.08 (d, *J* = 8.2 Hz, 2H), 6.08 (s, 2H), 6.01 (s, 2H); <sup>13</sup>C{<sup>1</sup>H} NMR (75 MHz, CDCl<sub>3</sub>) δ 187.7, 149.9, 147.3, 141.8, 136.1, 130.7, 130.5, 130.1, 129.4, 129.2, 129.1, 127.4, 127.2, 125.8, 124.1, 122.8, 119.4, 118.0, 99.1, 56.3; HRMS-ESI (*m/z*): [M + H]<sup>+</sup> calcd for C<sub>42</sub>H<sub>28</sub><sup>35</sup>ClN<sub>3</sub>O<sub>2</sub> 642.1947; found: 642.1947.

**((7R,15S)-17-(2-Bromophenyl)-5,7,13,15-tetrahydro-7,15-epiminocycloocta[1,2-b:5,6-b']diquinoline-6,14-diyl)bis(phenylmethanone) (3g)**

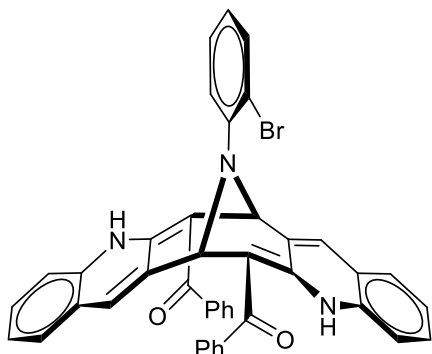

Yellow solid (52 mg, Yield 77%, m.p. 318-320 °C), (*n*-hexane/EtOAc = 3:1,  $R_f$  = 0.3);  $^1\text{H NMR}$  (400 MHz,  $\text{CDCl}_3$ )  $\delta$  7.67 (d,  $J$  = 8.0 Hz, 1H), 7.64-7.54 (m, 7H), 7.53 – 7.40 (m, 9H), 7.37 (d,  $J$  = 8.0 Hz, 1H), 7.23 (t,  $J$  = 8.1 Hz, 2H), 7.18 (t,  $J$  = 8.1 Hz, 1H), 7.12 (d,  $J$  = 8.4 Hz, 2H), 6.95 (t,  $J$  = 7.6 Hz, 1H), 5.92 (s, 2H), 5.84 (s, 2H);  $^{13}\text{C}\{^1\text{H}\}$  NMR (101 MHz,  $\text{CDCl}_3$ )  $\delta$  187.3, 162.7, 150.3, 147.9, 141.6, 136.1, 134.1, 130.5, 130.0, 129.0, 128.9, 128.5, 127.4, 127.3, 124.9, 124.0, 122.9, 122.5, 120.1, 118.0, 99.6, 57.2; HRMS-ESI ( $m/z$ ):  $[\text{M} + \text{H}]^+$  calcd for  $\text{C}_{42}\text{H}_{29}^{79}\text{BrN}_3\text{O}_2$  686.1563; found: 686.1563.

**((7R,15S)-17-(2-Methoxyphenyl)-5,7,13,15-tetrahydro-7,15-epiminocycloocta[1,2-b:5,6-b']diquinoline-6,14-diyl)bis(phenylmethanone) (3h)**

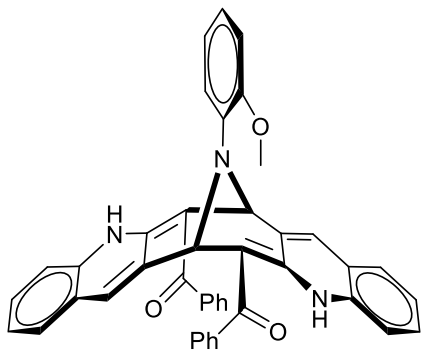

found: 638.2441.

Yellow solid (53 mg, Yield 84%, m.p. 307-309 °C), (*n*-hexane/EtOAc = 3:1,  $R_f$  = 0.3);  $^1\text{H NMR}$  (400 MHz,  $\text{CDCl}_3$ )  $\delta$  7.67 – 7.56 (m, 7H), 7.55 – 7.43 (m, 7H), 7.40 (d,  $J$  = 8.2 Hz, 2H), 7.32 (d,  $J$  = 7.9 Hz, 1H), 7.20 (t,  $J$  = 7.5 Hz, 2H), 7.11 (d,  $J$  = 8.0 Hz, 2H), 7.04 (t,  $J$  = 7.8 Hz, 1H), 6.97 (d,  $J$  = 8.1 Hz, 1H), 6.87 (t,  $J$  = 7.6 Hz, 1H), 6.13 (s, 2H), 5.88 (s, 2H), 4.06 (s, 3H);  $^{13}\text{C}\{^1\text{H}\}$  NMR (101 MHz,  $\text{CDCl}_3$ )  $\delta$  187.5, 152.0, 150.0, 141.9, 138.0, 136.1, 131.0, 130.3, 130.1, 129.0, 128.7, 127.4, 127.3, 123.8, 123.4, 123.0, 121.1, 119.8, 117.8, 111.1, 99.8, 55.9, 55.5; HRMS-ESI ( $m/z$ ):  $[\text{M} + \text{H}]^+$  calcd for  $\text{C}_{43}\text{H}_{32}\text{N}_3\text{O}_3$  638.2440;

**((7R,15S)-17-(4-Methoxyphenyl)-5,7,13,15-tetrahydro-7,15-epiminocycloocta[1,2-b:5,6-b']diquinoline-6,14-diyl)bis(phenylmethanone) (3i)**

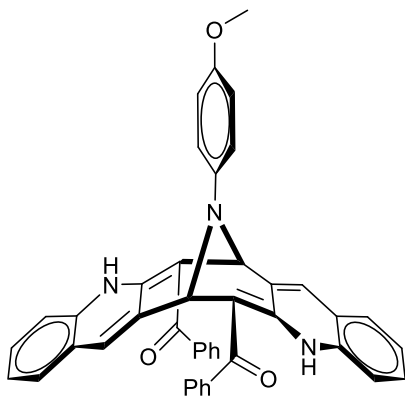

Yellow solid (55 mg, Yield 87%, m.p. 302-306 °C), (*n*-hexane/EtOAc = 3:1,  $R_f$  = 0.3);  $^1\text{H NMR}$  (250 MHz,  $\text{CDCl}_3$ )  $\delta$  7.66 – 7.55 (m, 7H), 7.54 – 7.37 (m, 8H), 7.22 – 7.05 (m, 7H), 6.84 (s, 1H), 6.81 (s, 1H), 5.96 (s, 4H), 3.73 (s, 3H);  $^{13}\text{C}\{^1\text{H}\}$  NMR (63 MHz,  $\text{CDCl}_3$ )  $\delta$  187.5, 150.1, 148.5, 142.5, 141.8, 136.2, 130.7, 130.4, 130.2, 129.0, 127.8, 127.2, 123.9, 122.9, 120.0, 118.0, 115.9, 114.6, 99.4, 56.9, 55.5; HRMS-ESI ( $m/z$ ):  $[\text{M} + \text{H}]^+$  calcd for  $\text{C}_{43}\text{H}_{31}\text{N}_3\text{O}_3$  638.2444; found: 638.2435.

**((7R,15S)-17-(4-Fluorophenyl)-5,7,13,15-tetrahydro-7,15-epiminocycloocta[1,2-b:5,6-b']diquinoline-6,14-diyl)bis(phenylmethanone) (3j)**

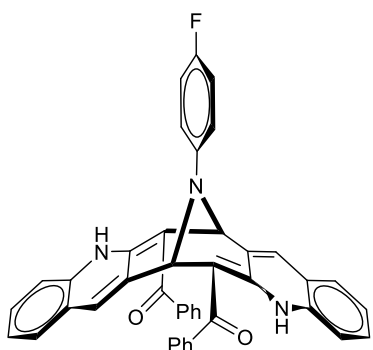

Yellow solid (50 mg, Yield 81%, m.p. 219-221 °C), (*n*-hexane/EtOAc = 3:1,  $R_f = 0.3$ );  $^1\text{H NMR}$  (300 MHz, DMSO- $d_6$ )  $\delta$  7.83-7.61 (m, 9H), 7.59-7.51 (m, 4H), 7.50-7.37 (m, 5H), 7.33-7.25 (m, 2H), 7.24-7.08 (m, 4H), 5.96 (s, 2H), 5.76 (s, 2H);  $^{13}\text{C}\{^1\text{H}\}$  NMR (76 MHz, DMSO- $d_6$ )  $\delta$  186.9, 158.6, 155.5 ( $^1J_{\text{C-F}} = 240.0$  Hz), 149.6, 145.2, 141.4, 136.3, 131.3, 130.2, 129.8, 129.7, 127.6, 127.4, 124.8, 122.4, 120.0, 119.9, 118.7, 116.6, 116.3 ( $^2J_{\text{C-F}} = 21.8$  Hz), 99.0, 56.2; **HRMS-ESI** ( $m/z$ ):  $[\text{M} + \text{H}]^+$  calcd for  $\text{C}_{42}\text{H}_{29}\text{FN}_3\text{O}_2$  626.5152; found: 626.5156.

**((7R,15S)-1,3,9,11-Tetramethyl-17-phenyl-5,7,13,15-tetrahydro-7,15-epiminocycloocta[1,2-b:5,6-b']diquinoline-6,14-diyl)bis(phenylmethanone) (3k)**

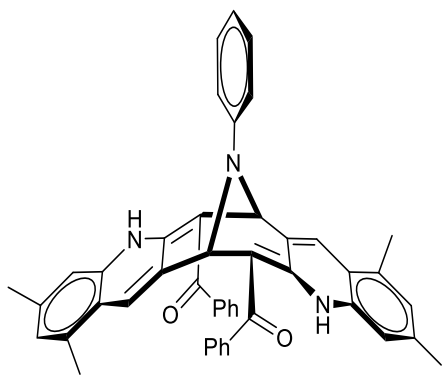

Yellow solid (61 mg, Yield 93%, m.p. 286-288 °C), (*n*-hexane/EtOAc = 3:1,  $R_f = 0.3$ );  $^1\text{H NMR}$  (400 MHz,  $\text{CDCl}_3$ )  $\delta$  7.70 – 7.52 (m, 11H), 7.33 (t,  $J = 8.7$  Hz, 2H), 7.14 (d,  $J = 8.2$  Hz, 2H), 7.07 (br s, 2H), 6.94 (d,  $J = 7.4$  Hz, 1H), 6.91 (br s, 2H), 6.69 (s, 2H), 6.24 (s, 2H), 2.39 (s, 6H), 2.24 (s, 6H);  $^{13}\text{C}\{^1\text{H}\}$  NMR (101 MHz,  $\text{CDCl}_3$ )  $\delta$  185.8, 149.9, 148.9, 142.0, 141.0, 136.6, 134.5, 130.1, 129.3, 129.1, 129.0, 127.4, 127.2, 127.1, 120.8, 120.3, 118.4, 116.0, 99.8, 56.3, 21.7, 18.3; **HRMS-ESI** ( $m/z$ ):  $[\text{M} + \text{H}]^+$  calcd for  $\text{C}_{46}\text{H}_{38}\text{N}_3\text{O}_2$  664.3248; found: 664.3248.

**((7R,15S)-1,3,9,11-Tetramethyl-17-(pyridin-2-yl)-5,7,13,15-tetrahydro-7,15-epiminocycloocta[1,2-b:5,6-b']diquinoline-6,14-diyl)bis(phenylmethanone) (3l)**

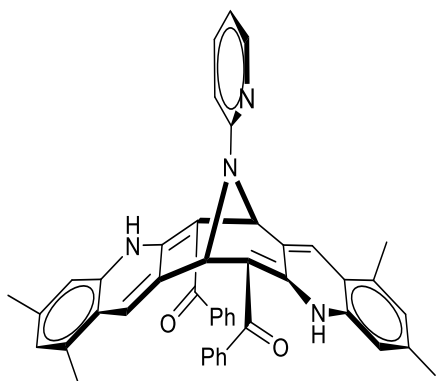

Yellow solid (45 mg, Yield 68%, m.p. 229-231 °C), (*n*-hexane/EtOAc = 3:1,  $R_f = 0.3$ );  $^1\text{H NMR}$  (300 MHz,  $\text{CDCl}_3$ )  $\delta$  8.43 (d,  $J = 6.0$  Hz, 1H), 7.96-7.77 (m, 5H), 7.74-7.65 (m, 5H), 7.63-7.54 (m, 3H), 7.07 (br s, 2H), 7.01 (s, 2H), 6.90 (br s, 2H), 6.81 (d,  $J = 8.5$  Hz, 1H), 6.74 (d,  $J = 8.4$  Hz, 1H), 6.72 (s, 2H), 2.39 (s, 6H), 2.23 (s, 6H);  $^{13}\text{C}\{^1\text{H}\}$  NMR (75 MHz,  $\text{CDCl}_3$ )  $\delta$  186.1, 162.9, 157.4, 150.1, 148.5, 142.0, 141.0, 137.9, 136.6, 134.6, 129.9, 129.1, 127.7, 127.5, 127.1, 120.2, 116.0, 114.4, 108.3, 100.1, 52.3, 21.7, 18.3; **HRMS-ESI** ( $m/z$ ):  $[\text{M} + \text{H}]^+$  calcd for  $\text{C}_{45}\text{H}_{37}\text{N}_4\text{O}_2$  665.2905; found: 665.2906.



**((7R,15S)-17-(3,5-Dimethylphenyl)-1,3,9,11-tetramethyl-5,7,13,15-tetrahydro-7,15-epiminocycloocta[1,2-b:5,6-b']diquinoline-6,14-diyl)bis(phenylmethanone) (3m)**

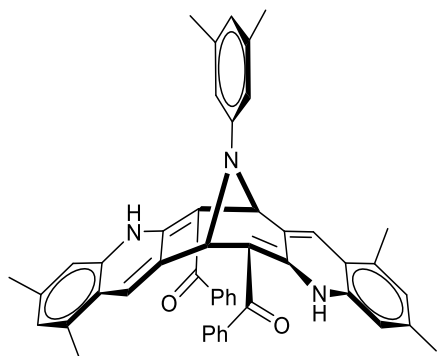

Yellow solid (65 mg, Yield 95%, m.p. 273-275 °C), (*n*-hexane/EtOAc = 4:1, R<sub>f</sub> = 0.3); <sup>1</sup>H NMR (300 MHz, CDCl<sub>3</sub>) δ 7.92-7.39 (m 12H), 7.08 (s, 2H), 6.92 (s, 2H), 6.79 (s, 2H), 6.73 (s, 2H), 6.61 (s, 1H), 6.24 (s, 2H), 2.41 (s, 6H), 2.34 (s, 6H), 2.27 (s, 6H); <sup>13</sup>C{<sup>1</sup>H} NMR (75 MHz, CDCl<sub>3</sub>) δ 185.66, 150.05, 148.9, 142.1, 140.8, 138.8, 136.7, 134.5, 130.4, 129.0 (2C), 127.3 (2C), 127.0, 122.6, 120.3, 116.2, 116.0, 100.1, 56.2, 21.8, 21.7, 18.3; HRMS-ESI (*m/z*): [M + H]<sup>+</sup> calcd for C<sub>48</sub>H<sub>42</sub>N<sub>3</sub>O<sub>2</sub> 692.2114; found: 692.2117.

**((7R,15S)-17-(4-Methoxyphenyl)-1,3,9,11-tetramethyl-5,7,13,15-tetrahydro-7,15-epiminocycloocta[1,2-b:5,6-b']diquinoline-6,14-diyl)bis(phenylmethanone) (3n)**

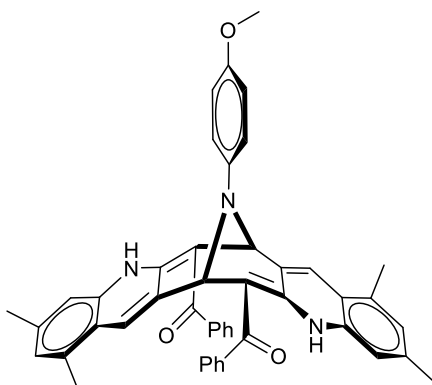

Yellow solid (62 mg, Yield 90%, m.p. 199-201 °C), (*n*-hexane/EtOAc = 3:1, R<sub>f</sub> = 0.3); <sup>1</sup>H NMR (300 MHz, CDCl<sub>3</sub>) δ 7.99 – 7.33 (m, 12H), 7.13 (d, *J* = 8.6 Hz, 2H), 7.08 (br s, 2H), 6.91 (br s, 2H), 6.89 (d, *J* = 8.4 Hz, 2H), 6.67 (s, 2H), 6.10 (s, 2H), 3.79 (s, 3H), 2.40 (s, 6H), 2.24 (s, 6H); <sup>13</sup>C{<sup>1</sup>H} NMR (75 MHz, CDCl<sub>3</sub>) δ 185.7, 154.3, 149.9, 142.9, 142.0, 140.8, 136.7, 134.5, 130.3, 129.0, 128.9, 127.3, 127.2, 127.0, 120.4, 120.3, 116.0, 114.5, 99.8, 57.1, 55.5, 21.7, 18.3; HRMS-ESI (*m/z*): [M + H]<sup>+</sup> calcd for C<sub>47</sub>H<sub>40</sub>N<sub>3</sub>O<sub>3</sub> 694.3060; found: 694.3062.

**((7R,15S)-17-(2-Methoxyphenyl)-1,3,9,11-tetramethyl-5,7,13,15-tetrahydro-7,15-epiminocycloocta[1,2-b:5,6-b']diquinoline-6,14-diyl)bis(phenylmethanone) (3o)**

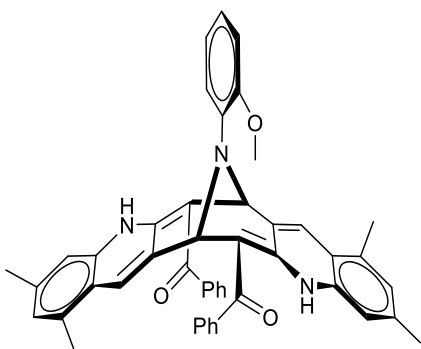

found: 694.3058.

Yellow solid (57 mg, Yield 83%, m.p. 308-310 °C), (*n*-hexane/EtOAc = 3:1, R<sub>f</sub> = 0.3); <sup>1</sup>H NMR (400 MHz, CDCl<sub>3</sub>) δ 7.65 – 7.47 (m, 12H), 7.31 (d, *J* = 7.9 Hz, 1H), 7.07 (br s, 2H), 7.03 (d, *J* = 7.9 Hz, 1H), 6.99 (d, *J* = 8.0 Hz, 1H), 6.87 (br s, 2H), 6.84 (d, *J* = 8.0 Hz, 1H), 6.51 (s, 2H), 6.19 (s, 2H), 4.05 (s, 3H), 2.38 (s, 6H), 2.16 (s, 6H); <sup>13</sup>C{<sup>1</sup>H} NMR (101 MHz, CDCl<sub>3</sub>) δ 185.7, 152.2, 149.8, 142.2, 140.6, 138.5, 136.6, 134.5, 130.5, 128.9, 128.8, 127.3, 127.0, 126.9, 123.3, 121.0, 120.3, 120.1, 115.9, 110.9, 100.2, 56.1, 55.5, 21.7, 18.2; HRMS-ESI (*m/z*): [M + H]<sup>+</sup> calcd for C<sub>47</sub>H<sub>40</sub>N<sub>3</sub>O<sub>3</sub> 694.3063;

**((7R,15S)-17-(4-Fluorophenyl)-1,3,9,11-tetramethyl-5,7,13,15-tetrahydro-7,15-epimino cycloocta[1,2-b:5,6-b']diquinoline-6,14-diyl)bis(phenylmethanone) (3p)**

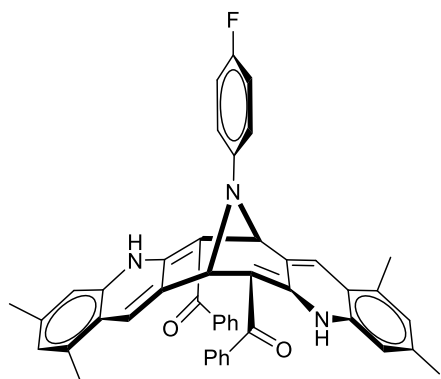

Yellow solid (53 mg, Yield 79%, m.p. 220-223 °C), (*n*-hexane/EtOAc = 3:1,  $R_f = 0.3$ );  $^1\text{H NMR}$  (300 MHz,  $\text{CDCl}_3$ )  $\delta$  7.72-7.51 (m, 10H), 7.19-6.97 (m, 6H), 6.92 (br s, 2H), 6.69 (br s, 2H), 6.12 (br s, 2H), 2.41 (br s, 6H), 2.25 (br s, 6H);  $^{13}\text{C}\{^1\text{H}\}$  NMR (75 MHz,  $\text{CDCl}_3$ )  $\delta$  185.7, 158.6, 155.9 ( $^1J_{\text{C-F}} = 244.0$  Hz), 149.8, 145.5, 141.9, 141.0, 136.7, 134.6, 130.0, 129.1, 129.0, 127.4, 127.2, 127.1, 120.3, 120.2, 120.1, 116.1, 116.0, 115.7 ( $^2J_{\text{C-F}} = 22.0$  Hz), 99.6, 57.0, 21.7, 18.3; **HRMS-ESI** ( $m/z$ ):  $[\text{M} + \text{H}]^+$  calcd for  $\text{C}_{46}\text{H}_{37}\text{FN}_3\text{O}_2$  682.2701; found: 682.2704.

**((7R,15S)-17-(2-Bromophenyl)-1,3,9,11-tetramethyl-5,7,13,15-tetrahydro-7,15-epiminocycloocta[1,2-b:5,6-b']diquinoline-6,14-diyl)bis(phenylmethanone) (3q)**

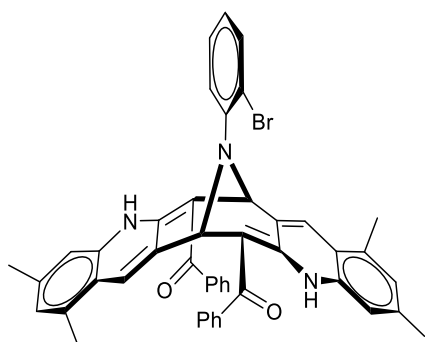

Yellow solid (62 mg, Yield 84%, m.p. 313-316 °C), (*n*-hexane/EtOAc = 3:1,  $R_f = 0.3$ );  $^1\text{H NMR}$  (300 MHz,  $\text{CDCl}_3$ )  $\delta$  7.71 (d,  $J = 7.9$  Hz, 1H), 7.65 – 7.48 (m, 12H), 7.35 (d,  $J = 7.9$  Hz, 1H), 7.19 (t,  $J = 7.6$  Hz, 1H), 7.11 (br s, 2H), 6.98 (t,  $J = 7.6$  Hz, 1H), 6.91 (br s, 2H), 6.52 (s, 2H), 6.04 (s, 2H), 2.41 (s, 6H), 2.19 (s, 6H);  $^{13}\text{C}\{^1\text{H}\}$  NMR (75 MHz,  $\text{CDCl}_3$ )  $\delta$  185.7, 150.1, 148.3, 141.9, 140.8, 136.7, 134.7, 134.1, 130.1, 128.9, 128.8, 128.5, 127.3, 127.0, 126.8, 124.8, 122.8, 120.4, 120.3, 116.0, 100.0, 57.4, 21.7, 18.3; **HRMS-ESI** ( $m/z$ ):  $[\text{M} + \text{H}]^+$  calcd for  $\text{C}_{46}\text{H}_{37}^{79}\text{BrN}_3\text{O}_2$  742.2055; found: 742.2054.

**((7R,15S)-1,3,9,11-Tetramethyl-17-(2-(phenylethynyl)phenyl)-5,7,13,15-tetrahydro-7,15-epiminocycloocta[1,2-b:5,6-b']diquinoline-6,14-diyl)bis(phenylmethanone) (3r)**

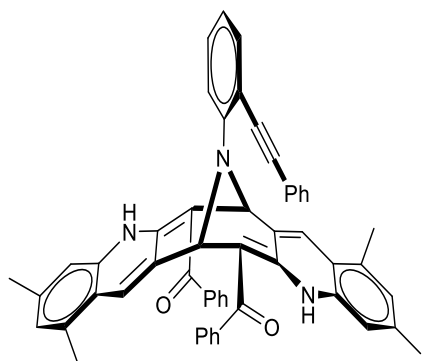

$\text{C}_{54}\text{H}_{41}\text{N}_3\text{O}_2$  764.3271; found: 764.3273.

Yellow solid (53 mg, Yield 70%, m.p. 314-318 °C), (*n*-hexane/EtOAc = 3:1,  $R_f = 0.3$ );  $^1\text{H NMR}$  (300 MHz,  $\text{CDCl}_3$ )  $\delta$  7.70 (d,  $J = 7.6$  Hz, 1H), 7.65 – 7.52 (m, 9H), 7.52 – 7.43 (m, 3H), 7.23 – 7.14 (m, 5H), 7.12-7.09 (m, 3H), 7.03 (t,  $J = 7.4$  Hz, 1H), 6.95 (d,  $J = 8.1$  Hz, 1H), 6.90 (s, 2H), 6.63 (s, 2H), 6.55 (s, 2H), 2.41 (s, 6H), 2.10 (s, 6H);  $^{13}\text{C}\{^1\text{H}\}$  NMR (75 MHz,  $\text{CDCl}_3$ )  $\delta$  185.6, 151.4, 150.0, 141.8, 140.8, 136.8, 134.6, 134.4, 131.4, 130.9, 129.6, 128.9, 128.8, 128.1, 128.0, 127.5, 127.1, 127.0, 123.2, 121.9, 120.3, 119.1, 116.7, 116.1, 100.3, 95.9, 88.1, 56.7, 21.8, 18.2; **HRMS-ESI** ( $m/z$ ):  $[\text{M} + \text{H}]^+$  calcd for

**((7R,15S)-17-(4-Chlorophenyl)-1,3,9,11-tetramethyl-5,7,13,15-tetrahydro-7,15-epiminocycloocta[1,2-b:5,6-b']diquinoline-6,14-diyl)bis(phenylmethanone) (3s)**

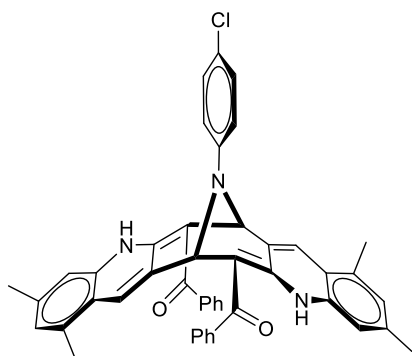

Yellow solid (62 mg, Yield 89%, m.p. 221-224 °C), (*n*-hexane/EtOAc = 4:1,  $R_f$  = 0.3);  $^1\text{H NMR}$  (300 MHz,  $\text{CDCl}_3$ ) 7.79 – 7.50 (m, 12H), 7.30 (s, 1H), 7.08 (br s, 4H), 6.92 (s, 2H), 6.69 (s, 2H), 6.18 (s, 2H), 2.41 (s, 6H), 2.26 (s, 6H);  $^{13}\text{C}\{^1\text{H}\}$  NMR (75 MHz,  $\text{CDCl}_3$ )  $\delta$  185.9, 149.7, 147.6, 141.9, 141.1, 136.7, 134.6, 129.8, 129.3, 129.2, 129.1, 127.5, 127.2, 127.1, 125.7, 120.2, 119.7, 116.0, 99.5, 56.5, 21.7, 18.3; HRMS-ESI ( $m/z$ ):  $[\text{M} + \text{H}]^+$  calcd for  $\text{C}_{46}\text{H}_{37}^{35}\text{ClN}_3\text{O}_2$  698.2566; found: 698.2568.

**((7R,15S)-17-(4-methoxy-2-nitrophenyl)-1,3,9,11-tetramethyl-5,7,13,15-tetrahydro-7,15-epiminocycloocta[1,2-b:5,6-b']diquinoline-6,14-diyl)bis(phenylmethanone) (3t)**

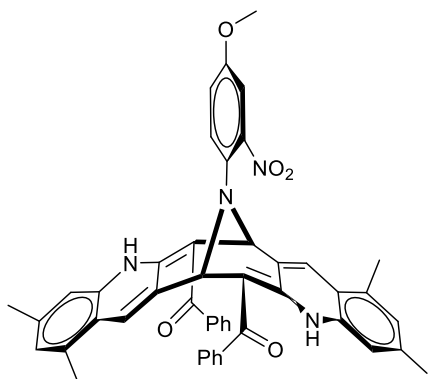

Yellow solid (46 mg, Yield 63%, m.p. 282-285 °C), (*n*-hexane/EtOAc = 3:1,  $R_f$  = 0.3);  $^1\text{H NMR}$  (300 MHz,  $\text{CDCl}_3$ )  $\delta$  7.72 – 7.41 (m, 13H), 7.40 (d,  $J$  = 3.1 Hz, 1H), 7.10 (s, 2H), 6.98 (dd,  $J$  = 8.9, 3.1 Hz, 1H), 6.90 (s, 2H), 6.43 (s, 2H), 5.78 (s, 2H), 3.84 (s, 3H), 2.41 (s, 6H), 2.17 (s, 6H);  $^{13}\text{C}\{^1\text{H}\}$  NMR (75 MHz,  $\text{CDCl}_3$ )  $\delta$  186.0, 155.7, 149.8, 146.4, 141.9, 140.9, 137.3, 136.6, 134.7, 129.7, 129.0, 128.9, 127.1, 127.0, 126.7, 125.2, 120.2, 119.5, 116.0, 110.1, 99.9, 58.9, 55.9, 21.7, 18.2; HRMS-ESI ( $m/z$ ):  $[\text{M} + \text{H}]^+$  calcd for  $\text{C}_{47}\text{H}_{39}\text{N}_4\text{O}_5$  739.1302; found: 739.1304.

**((7R,15S)-1,4,9,12-Tetramethyl-17-(pyridin-2-yl)-5,7,13,15-tetrahydro-7,15-epiminocycloocta[1,2-b:5,6-b']diquinoline-6,14-diyl)bis(phenylmethanone) (3u)**

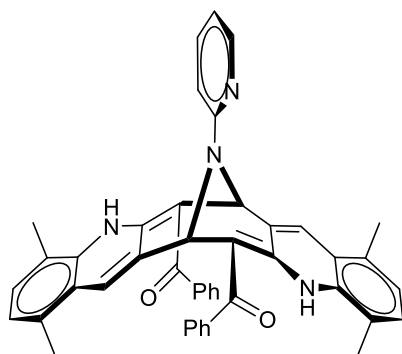

Yellow solid (46 mg, Yield 70%, m.p. 194-197 °C), (*n*-hexane/EtOAc = 3:1,  $R_f$  = 0.3);  $^1\text{H NMR}$  (300 MHz,  $\text{CDCl}_3$ )  $\delta$  8.32 (d,  $J$  = 6.9 Hz, 1H), 7.81-7.66 (m, 5H), 7.65 – 7.55 (m, 5H), 7.52 (d,  $J$  = 7.0 Hz, 2H), 7.45 (t,  $J$  = 6.9 Hz, 1H), 7.11 (d,  $J$  = 7.3 Hz, 2H), 6.98 (br s, 2H), 6.86 (d,  $J$  = 7.3 Hz, 2H), 6.73 (d,  $J$  = 8.6 Hz, 1H), 6.70 (br s, 2H), 6.62 (dd,  $J$  = 7.2, 4.9 Hz, 1H), 2.42 (s, 6H), 2.13 (s, 6H);  $^{13}\text{C}\{^1\text{H}\}$  NMR (75 MHz,  $\text{CDCl}_3$ ) 186.1, 157.4, 149.7, 148.4, 141.9, 138.0, 135.6, 132.4, 130.7, 130.5, 129.2, 129.1, 127.8, 127.5, 124.7, 123.9, 122.1, 114.4, 108.3, 100.3, 52.3, 18.2, 17.0; HRMS-ESI ( $m/z$ ):  $[\text{M} + \text{H}]^+$  calcd for  $\text{C}_{45}\text{H}_{37}\text{N}_4\text{O}_2$  665.2906; found: 665.2908.

665.2906; found: 665.2908.

**((7R,15S)-3,11-Dimethoxy-17-(2-methoxyphenyl)-5,7,13,15-tetrahydro-7,15-epiminocycloocta[1,2-b:5,6-b']diquinoline-6,14-diyl)bis(phenylmethanone) (3v)**

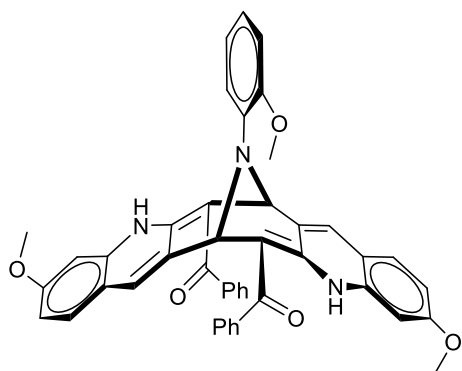

Yellow solid (59 mg, Yield 86%, m.p. 310-311 °C), (*n*-hexane/EtOAc = 3:1, R<sub>f</sub> = 0.3); <sup>1</sup>H NMR (300 MHz, CDCl<sub>3</sub>) δ 7.51 – 7.41 (m, 7H), 7.40 – 7.35 (m, 4H), 7.14 (d, *J* = 8.4 Hz, 1H), 6.97 – 6.75 (m, 5H), 6.73 – 6.66 (m, 5H), 5.96 (s, 2H), 5.76 (s, 2H), 3.91 (s, 3H), 3.71 (s, 6H); <sup>13</sup>C{<sup>1</sup>H} NMR (75 MHz, CDCl<sub>3</sub>) δ 185.8, 161.5, 152.0, 150.4, 141.9, 138.3, 137.9, 130.4, 128.9, 128.8, 128.7, 128.5, 127.5, 123.3, 121.1, 119.8, 117.7, 114.8, 111.0, 100.3, 99.3, 55.8, 55.6, 55.5; HRMS-ESI (*m/z*): [M + H]<sup>+</sup> calcd for C<sub>45</sub>H<sub>36</sub>N<sub>3</sub>O<sub>5</sub> 698.2650; found: 698.2651.

**((7R,15S)-17-(3,5-Dimethylphenyl)-2,10-dimethoxy-5,7,13,15-tetrahydro-7,15-epiminocycloocta[1,2-b:5,6-b']diquinoline-6,14-diyl)bis(phenylmethanone) (3w)**

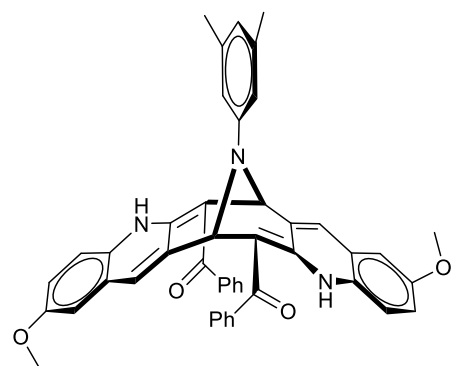

Yellow solid (62 mg, Yield 90%, m.p. 206-207 °C), (*n*-hexane/EtOAc = 3:1, R<sub>f</sub> = 0.3); <sup>1</sup>H NMR (250 MHz, CDCl<sub>3</sub>) δ 7.68 – 7.48 (m, 12H), 7.39 (d, *J* = 9.2 Hz, 2H), 7.12 (d, *J* = 9.4 Hz, 2H), 6.71 (s, 2H), 6.61 – 6.50 (m, 3H), 6.19 (s, 2H), 6.12 (s, 2H), 3.84 (s, 6H), 2.28 (s, 6H). <sup>13</sup>C{<sup>1</sup>H} NMR (63 MHz, CDCl<sub>3</sub>) δ 181.5, 156.4, 149.8, 148.7, 141.1, 138.8, 132.5, 131.5, 130.3, 129.0, 128.9, 127.7, 124.5, 122.7, 120.9, 120.7, 116.1, 107.4, 100.2, 56.1, 55.6, 21.8.; HRMS-ESI (*m/z*): [M + H]<sup>+</sup> calcd for C<sub>46</sub>H<sub>38</sub>N<sub>3</sub>O<sub>4</sub> 696.2863; found: 696.2867.

**((7R,15S)-17-(4-Fluorophenyl)-2,10-diisopropyl-5,7,13,15-tetrahydro-7,15-epiminocycloocta[1,2-b:5,6-b']diquinoline-6,14-diyl)bis(phenylmethanone) (3x)**

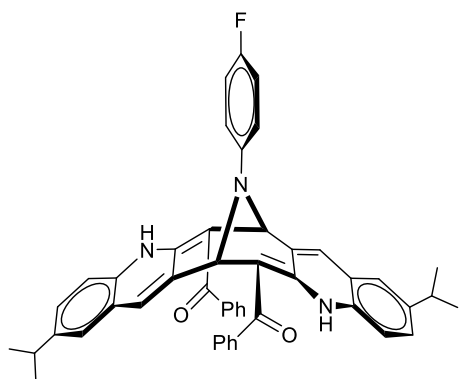

Yellow solid (51 mg, Yield 73%, m.p. 212-215 °C), (*n*-hexane/EtOAc = 3:1, R<sub>f</sub> = 0.3); <sup>1</sup>H NMR (300 MHz, CDCl<sub>3</sub>) δ 7.83 – 7.62 (m, 7H), 7.55 – 7.47 (m, 4H), 7.44 – 7.34 (m, 4H), 7.20 – 6.85 (m, 7H), 6.06 (br s, 2H), 6.03 (br s, 2H), 3.16-2.83 (m, 2H), 1.33 (s, 6H), 1.31 (s, 6H); <sup>13</sup>C{<sup>1</sup>H} NMR (75 MHz, CDCl<sub>3</sub>) δ 186.3, 159.5, 156.3 (<sup>1</sup>J<sub>C-F</sub> = 242.2 Hz), 149.8, 145.0, 141.8, 139.2, 134.7, 130.6, 130.4, 129.8, 129.1, 129.0, 127.3, 124.2, 123.0, 120.0, 119.9, 118.2, 116.0, 115.7 (<sup>2</sup>J<sub>C-F</sub> = 22.5 Hz), 99.1, 56.9, 33.7, 23.9; HRMS-ESI (*m/z*): [M + H]<sup>+</sup> calcd for C<sub>48</sub>H<sub>41</sub>FN<sub>3</sub>O<sub>2</sub> 710.3178; found: 710.3179.

**((7R,15S)-17-(3,4-Dimethylphenyl)-2,10-diisopropyl-5,7,13,15-tetrahydro-7,15-epiminocycloocta[1,2-b:5,6-b']diquinoline-6,14-diyl)bis(phenylmethanone) (3y)**

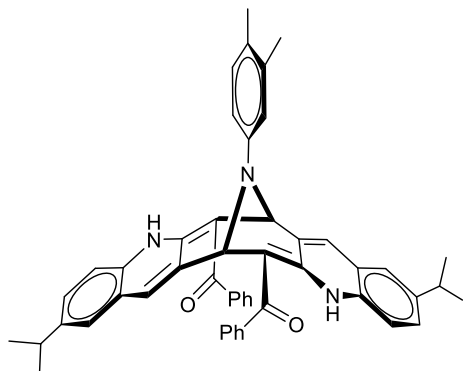

Yellow solid (63 mg, Yield 89%, m.p. 277-280 °C), (*n*-hexane/EtOAc = 3:1, R<sub>f</sub> = 0.3); <sup>1</sup>H NMR (300 MHz, CDCl<sub>3</sub>) δ 7.70 – 7.47 (m, 8H), 7.46 – 7.36 (m, 4H), 7.32 – 7.20 (m, 4H), 6.91 (d, *J* = 8.4 Hz, 1H), 6.90 – 6.83 (br s, 3H), 6.73 (d, *J* = 8.2 Hz, 1H), 5.98 (br s, 2H), 5.97 (br s, 2H), 2.98-2.80 (m, 2H), 2.17 (s, 3H), 2.07 (s, 3H), 1.20 (s, 6H), 1.18 (s, 6H); <sup>13</sup>C{<sup>1</sup>H} NMR (75 MHz, CDCl<sub>3</sub>) δ 186.1, 150.0, 146.7, 144.8, 141.9, 137.3, 134.7, 130.8, 130.5, 130.3, 129.6, 129.1, 129.0, 128.9, 127.4, 124.1, 123.1, 120.1, 118.1, 115.5, 99.5, 56.3, 33.7, 23.9, 20.4, 18.8; HRMS-ESI (*m/z*): [M + H]<sup>+</sup> calcd for C<sub>50</sub>H<sub>46</sub>N<sub>3</sub>O<sub>2</sub> 720.3580; found: 720.3582.

**((7R,15S)-2,10-Dichloro-17-phenyl-5,7,13,15-tetrahydro-7,15-epiminocycloocta[1,2-b:5,6-b']diquinoline-6,14-diyl)bis(phenylmethanone) (3z)**

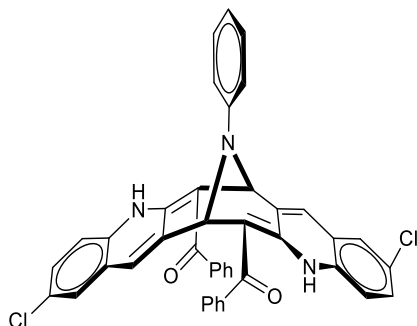

Yellow solid (62 mg, Yield 92%, m.p. 206-209 °C), (*n*-hexane/EtOAc = 3:1, R<sub>f</sub> = 0.3); <sup>1</sup>H NMR (300 MHz, CDCl<sub>3</sub>) δ 7.99 – 7.92 (m, 3H), 7.89 – 7.78 (m, 8H), 7.74 – 7.74 (m, 2H), 7.45 (s, 5H), 7.32 (s, 2H), 7.08 (s, 3H), 6.09 (s, 2H), 5.87 (s, 2H). <sup>13</sup>C{<sup>1</sup>H} NMR (75 MHz, CDCl<sub>3</sub>) δ 186.7, 150.1, 148.4, 141.2, 135.1, 131.5, 130.9, 129.6, 129.5, 129.4, 129.2, 129.1, 127.3, 126.2, 125.8, 123.8, 119.8, 118.2, 99.8, 77.5, 77.1, 76.7, 56.0; HRMS-ESI (*m/z*): [M + H]<sup>+</sup> calcd for C<sub>42</sub>H<sub>27</sub><sup>37</sup>Cl<sub>2</sub>N<sub>3</sub>O<sub>2</sub> 676.1559; found: 676.1558.

**((7R,15S)-17-(3,5-Dimethylphenyl)-5,7,13,15-tetrahydro-7,15-epiminocycloocta[1,2-b:5,6-b']diquinoline-6,14-diyl)bis((4-methoxyphenyl)methanone) (3aa)**

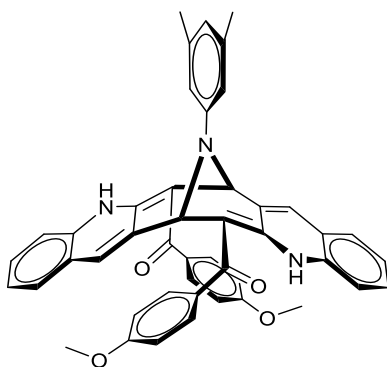

Yellow solid (56 mg, Yield 82%, m.p. 291-293 °C), (*n*-hexane/EtOAc = 3:1, R<sub>f</sub> = 0.4); <sup>1</sup>H NMR (300 MHz, CDCl<sub>3</sub>) δ 7.80 – 7.46 (m, 7H), 7.44 – 7.32 (m, 3H), 7.31 – 7.05 (m, 8H), 6.77 (br s, 2H), 6.60 (br s, 1H), 6.28 (br s, 2H), 6.19 (br s, 2H), 4.03 (br s, 6H), 2.34 (br s, 6H); <sup>13</sup>C{<sup>1</sup>H} NMR (75 MHz, CDCl<sub>3</sub>) δ 186.8, 160.3, 150.1, 148.7, 138.9, 136.4, 134.4, 131.2, 130.4, 130.0, 128.9, 127.2, 123.8, 123.0, 122.8, 118.0, 116.1, 114.1, 100.2, 56.2, 55.5, 21.8; HRMS-ESI (*m/z*): [M + H]<sup>+</sup> calcd for C<sub>46</sub>H<sub>38</sub>N<sub>3</sub>O<sub>4</sub> 696.2808; found: 696.2809.

**((7R,15S)-17-(4-Fluorophenyl)-5,7,13,15-tetrahydro-7,15-epiminocycloocta[1,2-b:5,6-b']diquinoline-6,14-diyl)bis((4-methoxyphenyl)methanone) (3ab)**

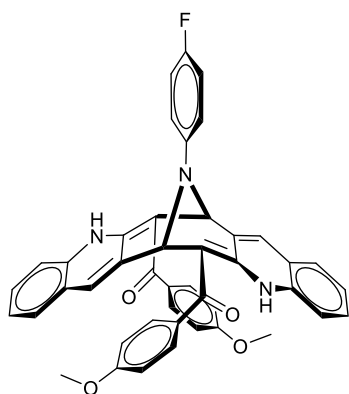

Yellow solid (51 mg, Yield 75%, m.p. 269-271 °C), (*n*-hexane/EtOAc = 3:1, R<sub>f</sub> = 0.3); <sup>1</sup>H NMR (300 MHz, DMSO-*d*<sub>6</sub>) (mixture of two rotamers (66:34)) δ 8.72 (s, 1H, minor rotamer), 8.72 (s, 1H, major rotamer), 8.41-8.22 (m, 1H, mixture of two rotamers), 8.21 – 8.04 (m, 2H, major rotamer), 8.02 – 7.92 (m, 2H, minor rotamer), 7.86 – 7.60 (m, 4H, mixture of two rotamers), 7.58 – 7.38 (m, 4H, mixture of two rotamers), 7.34 – 6.96 (m, 9H, mixture of two rotamers), 6.84 – 6.57 (m, 1H, mixture of two rotamers), 6.32-6.18 (m, 2H, minor rotamer), 6.05 (d, *J* = 11.0 Hz, 2H, major rotamer), 5.59 (s, 1H, major rotamer), 5.47 (s, 1H, minor rotamer), 3.97 (s, 4H, major rotamer), 3.92 (s, 2H, minor rotamer); <sup>13</sup>C{<sup>1</sup>H} NMR (75 MHz, DMSO-*d*<sub>6</sub>) (mixture of two rotamers (66:34)) δ 185.9, 185.8, 163.9, 163.8, 160.6, 160.5 (<sup>1</sup>*J*<sub>C-F</sub> = 247.2 Hz), 149.7, 147.2, 146.8, 136.7, 133.7, 131.9, 131.7, 131.5, 131.3, 131.2, 130.3, 130.2, 129.7, 129.1, 128.7, 128.5, 128.3, 127.6, 127.0, 124.8, 122.6, 121.4, 120.2, 120.1, 119.0, 117.2, 116.6, 116.4, 116.1, 114.8 (<sup>2</sup>*J*<sub>C-F</sub> = 23.2 Hz), 101.6, 99.7, 99.2, 56.4, 56.1, 55.9, 55.8; HRMS-ESI (*m/z*): [M + H]<sup>+</sup> calcd for C<sub>44</sub>H<sub>33</sub>FN<sub>3</sub>O<sub>4</sub> 686.2446; found: 686.2449.

**((7R,15S)-17-(Naphthalen-1-yl)-5,7,13,15-tetrahydro-7,15-epiminocycloocta[1,2-b:5,6-b']diquinoline-6,14-diyl)bis((4-bromophenyl)methanone) (3ac)**

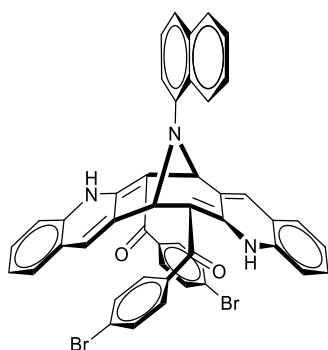

Yellow solid (71 mg, Yield 88%, m.p. 229-231 °C), (*n*-hexane/EtOAc = 3:1, R<sub>f</sub> = 0.3); <sup>1</sup>H NMR (300 MHz, CDCl<sub>3</sub>) δ 8.26 (d, *J* = 8.4, 2.8 Hz, 1H), 8.04 – 7.82 (m, 2H), 7.79 – 7.36 (m, 14H), 7.36 -7.22 (M, 5H), 7.22 – 6.92 (m, 3H), 6.17 (s, 1H), 6.09 (s, 1H), 6.01 (s, 1H), 5.89 (s, 1H); <sup>13</sup>C{<sup>1</sup>H} NMR (75 MHz, CDCl<sub>3</sub>) δ 187.8, 185.8, 146.2, 140.3, 136.3, 134.8, 133.1, 132.0, 130.7, 129.0, 128.9, 128.8, 127.4, 126.3, 126.0, 125.9, 124.4, 124.2, 123.5, 123.2, 123.1, 118.2, 116.5, 102.1, 98.1, 58.7, 58.0; HRMS-ESI (*m/z*): [M + H]<sup>+</sup> calcd for C<sub>46</sub>H<sub>30</sub><sup>79</sup>Br<sub>2</sub>N<sub>3</sub>O<sub>2</sub> 814.0692; found: 814.0693.

**((7R,15S)-17-(3,5-Dimethylphenyl)-5,7,13,15-tetrahydro-7,15-epiminocycloocta[1,2-b:5,6-b']diquinoline-6,14-diyl)bis((4-bromophenyl)methanone) (3ad)**

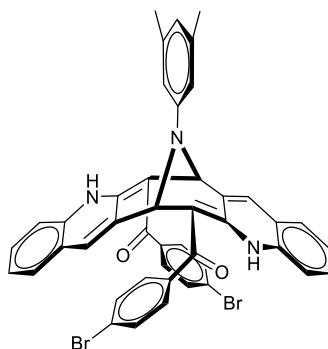

Yellow solid (71 mg, Yield 90%, m.p. 203-206 °C), (*n*-hexane/EtOAc = 3:1, R<sub>f</sub> = 0.3); <sup>1</sup>H NMR (300 MHz, CDCl<sub>3</sub>) δ 7.90 – 7.70 (m, 5H), 7.58 – 7.47 (m, 3H), 7.46-7.37 (m, 6H), 7.36 – 7.23 (m, 4H), 6.71 (s, 2H), 6.62 (s, 1H), 6.29 (s, 2H), 6.07 (s, 2H), 2.33 (s, 6H); <sup>13</sup>C{<sup>1</sup>H} NMR (75 MHz, CDCl<sub>3</sub>) δ 185.6, 150.2, 148.5, 140.6, 139.0, 136.1, 132.1, 130.9, 130.7, 130.4, 129.1, 127.4, 124.4, 123.3, 123.1, 123.0, 118.1, 116.1, 99.8, 56.2, 21.8; HRMS-ESI (*m/z*): [M + H]<sup>+</sup> calcd for C<sub>44</sub>H<sub>32</sub><sup>79</sup>Br<sub>2</sub>N<sub>3</sub>O<sub>2</sub> 792.0587; found: 792.0586.

**((7R,15S)-17-(4-Fluorophenyl)-5,7,13,15-tetrahydro-7,15-epiminocycloocta[1,2-b:5,6-b']diquinoline-6,14-diyl)bis((4-bromophenyl)methanone) (3ae)**

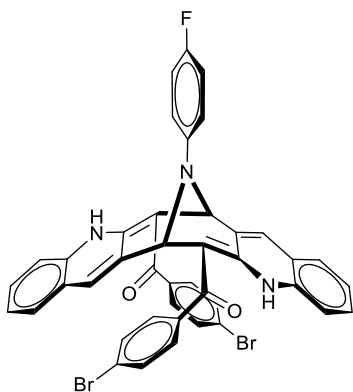

Yellow solid (57 mg, Yield 74%, m.p. 238-240 °C), (*n*-hexane/EtOAc = 3:1, R<sub>f</sub> = 0.3); <sup>1</sup>H NMR (300 MHz, CDCl<sub>3</sub>) δ 7.82 – 7.69 (m, 5H), 7.50 – 7.29 (m, 10H), 7.25 – 7.20 (m, 3H), 7.02 (s, 4H), 6.16 (s, 2H), 5.90 (s, 2H); <sup>13</sup>C{<sup>1</sup>H} NMR (75 MHz, CDCl<sub>3</sub>) δ 185.8, 159.5, 156.3 (<sup>1</sup>J<sub>C-F</sub> = 241.8 Hz), 149.9, 145.0, 140.5, 136.1, 132.2, 130.8, 130.4, 129.0, 127.4, 124.4, 123.3, 122.9, 120.6, 112.0, 118.1, 116.2, 115.9 (<sup>2</sup>J<sub>C-F</sub> = 21.3 Hz), 99.3, 57.0.; HRMS-ESI (*m/z*): [M + H]<sup>+</sup> calcd for C<sub>42</sub>H<sub>26</sub><sup>79</sup>Br<sub>2</sub>FN<sub>3</sub>O<sub>2</sub> 782.0455; found: 782.0442.

**((7R,15S)-17-Phenyl-5,7,13,15-tetrahydro-7,15-epiminocycloocta[1,2-b:5,6-b']diquinoline-6,14-diyl)bis((4-bromophenyl)methanone) (3af)**

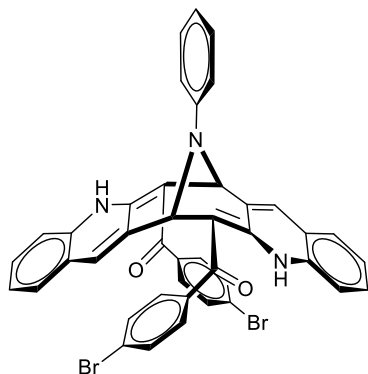

Yellow solid (70 mg, Yield 93%, m.p. 278-281 °C), (*n*-hexane/EtOAc = 3:1, R<sub>f</sub> = 0.3); <sup>1</sup>H NMR (300 MHz, CDCl<sub>3</sub>) δ 7.75 (s, 5H), 7.58 – 7.34 (m, 10H), 7.26 – 6.89 (m, 8H), 6.17 (s, 2H), 6.02 (s, 2H); <sup>13</sup>C{<sup>1</sup>H} NMR (75 MHz, CDCl<sub>3</sub>) δ 186.0, 150.1, 148.5, 140.6, 136.1, 132.2, 130.9, 130.6, 130.5, 129.6, 129.1, 127.4, 124.5, 123.3, 122.9, 121.3, 118.2, 118.1, 99.5, 77.5, 77.1, 76.7, 56.3.; HRMS-ESI (*m/z*): [M + H]<sup>+</sup> calcd for C<sub>42</sub>H<sub>27</sub><sup>79</sup>Br<sub>2</sub>N<sub>3</sub>O<sub>2</sub> 764.0549; found: 764.0540.

**((7R,7'R,15S,15'S)-1,4-Phenylenebis(5,7,13,15-tetrahydro-7,15-epiminocycloocta[1,2-b:5,6-b']diquinoline-17,6,14-triyl))tetrakis(phenylmethanone) (3ag)**

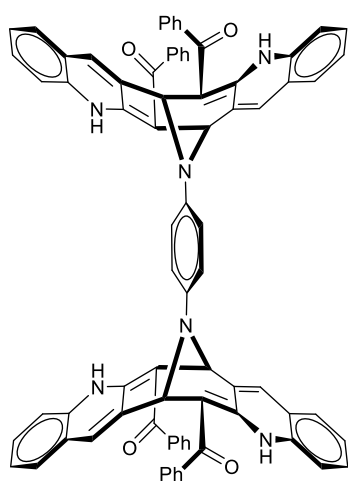

Yellow solid (60 mg, Yield 53%, m.p. 235-237 °C), (*n*-hexane/EtOAc = 3:1, R<sub>f</sub> = 0.3); <sup>1</sup>H NMR (300 MHz, CDCl<sub>3</sub>) δ 7.85-7.58 (m, 15H), 7.56 – 7.34 (m, 11H), 7.21-6.93 (m, 18H), 6.18-5.88 (m, 8H); <sup>13</sup>C{<sup>1</sup>H} NMR (75 MHz, CDCl<sub>3</sub>) δ 187.1, 149.8, 142.8, 141.8, 141.7, 135.8, 130.6, 130.4, 130.3, 129.2, 129.0, 127.2, 127.1, 124.0, 123.9, 122.6, 119.5, 117.6, 99.4, 56.3; HRMS-ESI (*m/z*): [M + H]<sup>+</sup> calcd for C<sub>78</sub>H<sub>53</sub>N<sub>6</sub>O<sub>4</sub> 1137.4115; found: 1137.4119.

## Supporting Information

### ((7S,15R)-17-(4-fluorophenyl)-2-isopropyl-5,7,13,15-tetrahydro-7,15-epiminocycloocta[1,2-b:5,6-b']diquinoline-6,14-diyl)bis(phenylmethanone) (3ah)

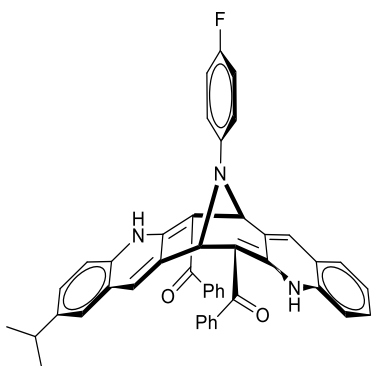

Yellow solid (Yield 37%, m.p. 229-231 °C), (*n*-hexane/EtOAc = 3:1, R<sub>f</sub> = 0.3); <sup>1</sup>H NMR (300 MHz, CDCl<sub>3</sub>) δ 8.20-7.99 (m, 1H), 7.82-7.70 (m, 1H), 7.69-7.56 (m, 6H), 7.51 – 7.41 (m, 5H), 7.39 – 7.32 (m, 2H), 7.24-7.12 (m, 4H), 7.11-7.03 (m, 1H), 7.02 – 6.94 (m, 3H), 6.92 – 6.73 (m, 2H), 5.99 (br s, 2H), 3.10-2.95 (m, 1H), 1.22 (d, *J* = 6.7 Hz, 6H); <sup>13</sup>C{<sup>1</sup>H} NMR (75 MHz, CDCl<sub>3</sub>) δ 196.8, 159.0, 155.8 (<sup>1</sup>J<sub>C-F</sub> = 241.0 Hz), 149.5, 145.0, 141.2, 135.6, 134.1, 132.1, 131.3, 130.3, 129.6, 129.3, 128.5, 128.3, 127.7, 127.3, 127.1, 126.7, 123.6, 122.9, 120.5, 119.4, 119.3, 118.1, 117.6, 115.6, 115.5, 115.3 (<sup>2</sup>J<sub>C-F</sub> = 21.1 Hz), 115.2, 56.4, 33.2,

23.4.; HRMS-ESI (*m/z*): [M + H]<sup>+</sup> calcd for C<sub>45</sub>H<sub>35</sub>FN<sub>3</sub>O<sub>2</sub> 668.7071; found: 668.7078.



Supporting Information

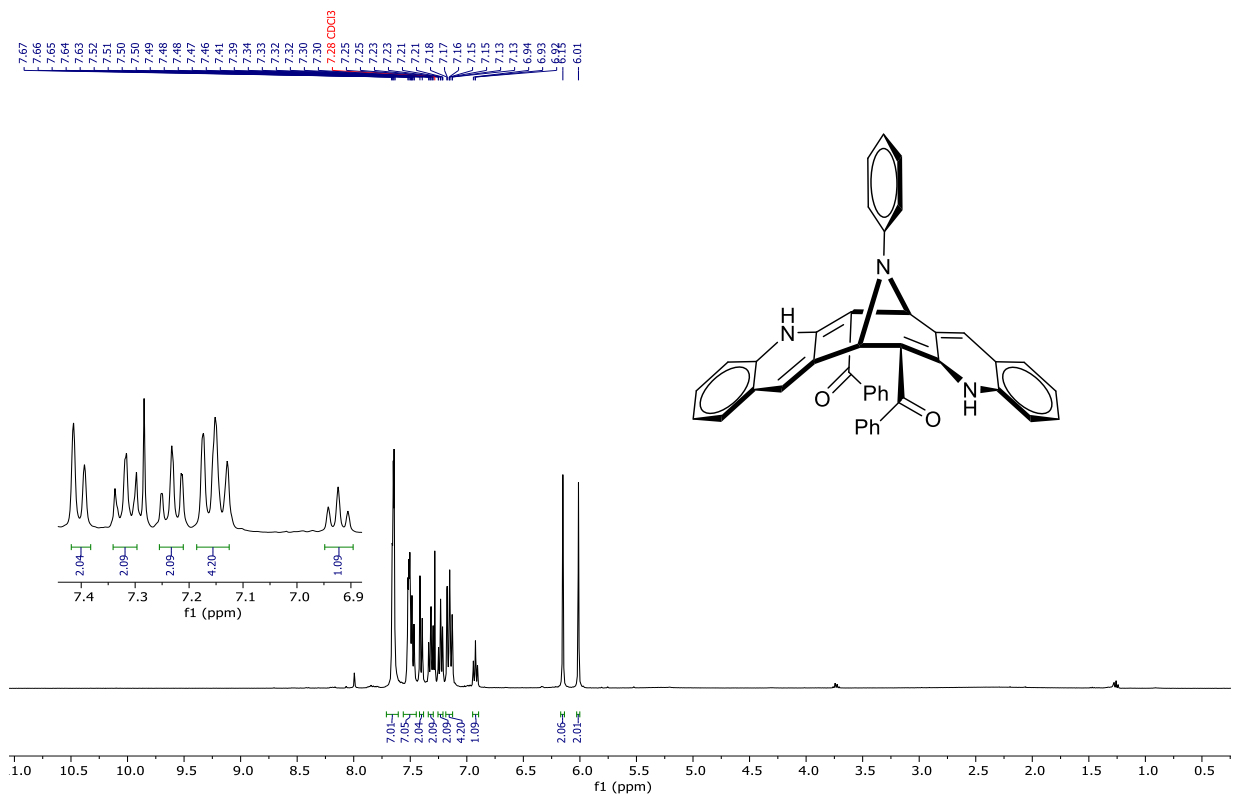

Figure S1:  $^1\text{H NMR}$  Compound 3a (400 MHz,  $\text{CDCl}_3$ )

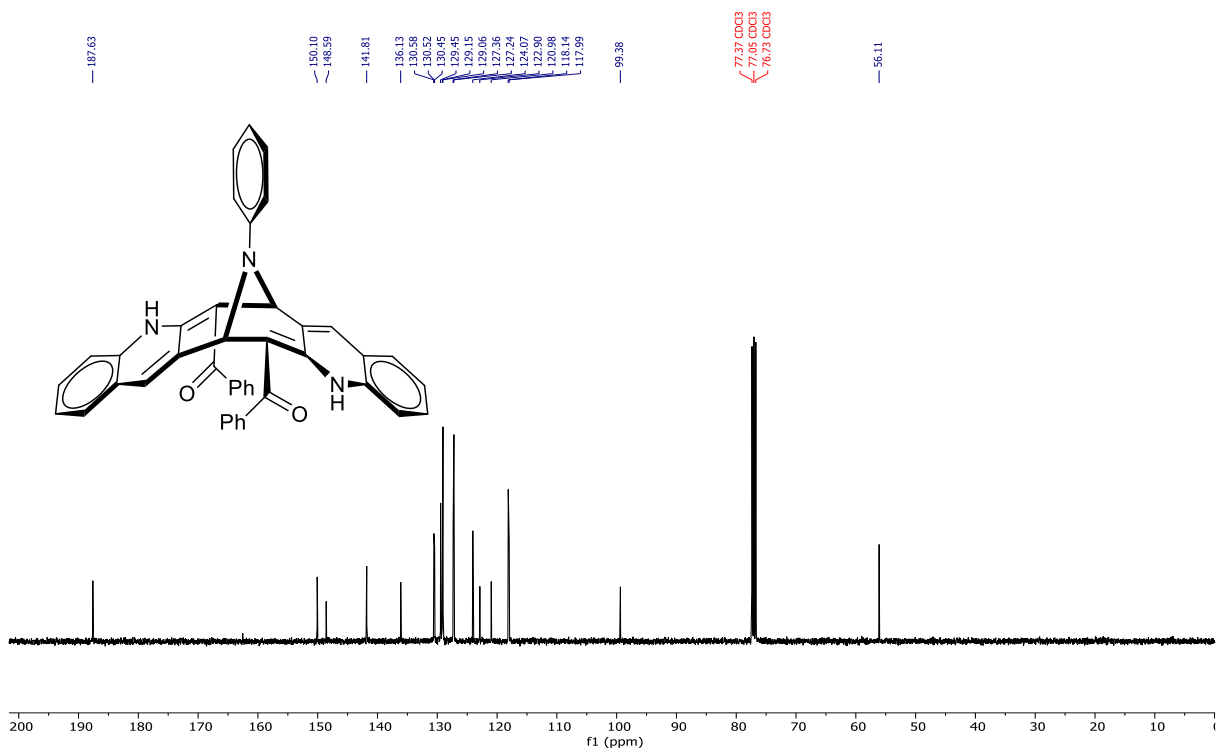

Figure S2:  $^{13}\text{C}\{^1\text{H}\}$  NMR Compound 3a (101 MHz,  $\text{CDCl}_3$ )

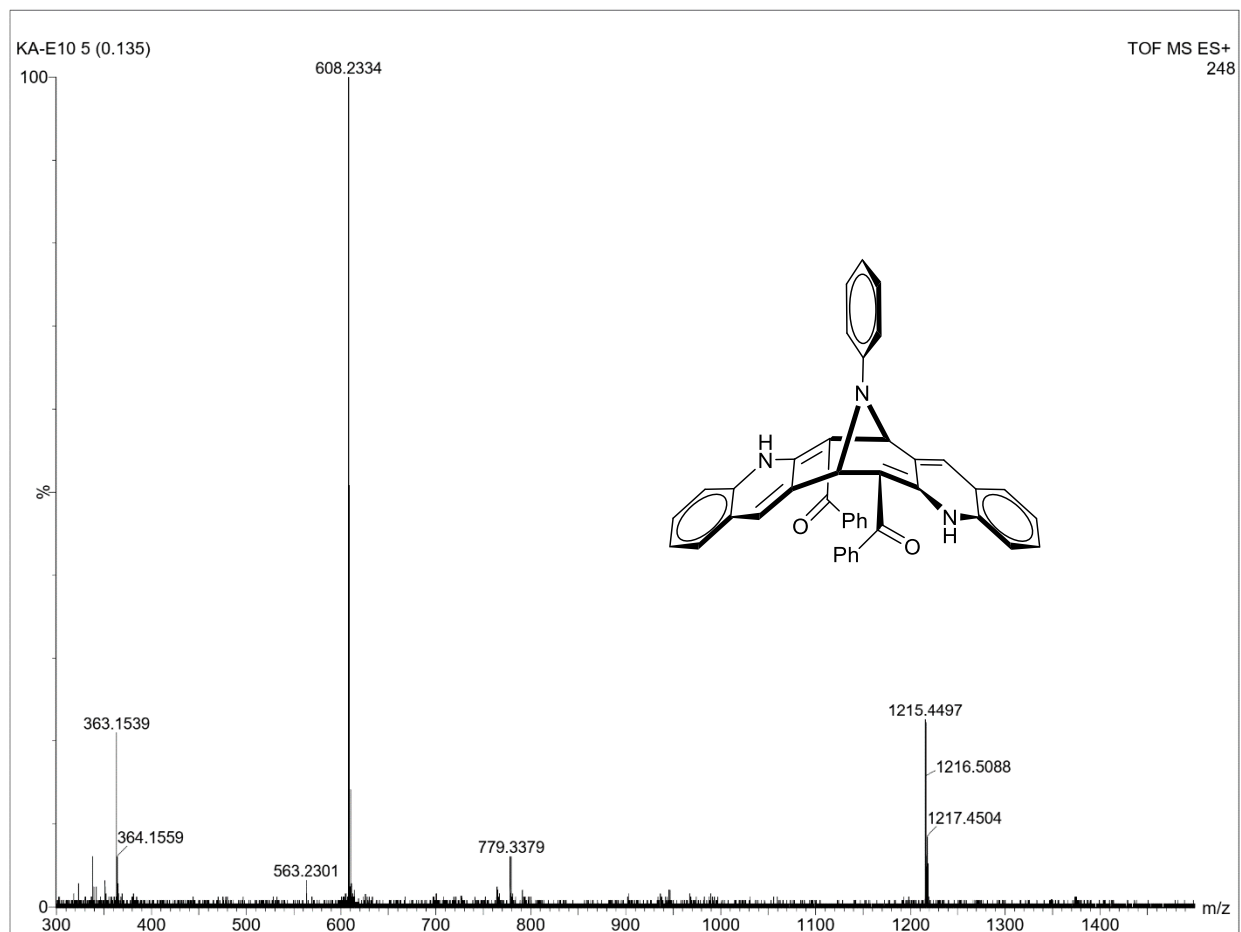Figure S3: HRMS (ESI) of **3a**

Supporting Information

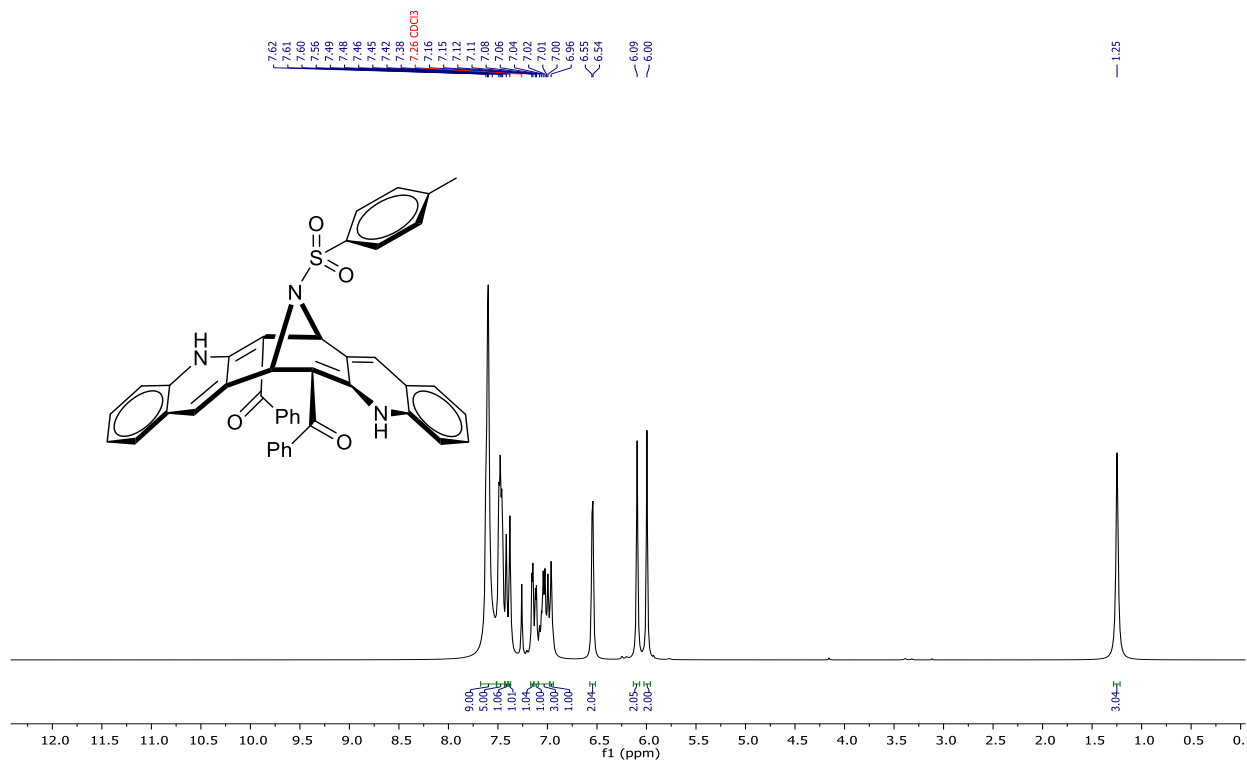

Figure S4: <sup>1</sup>H NMR Compound **3b** (250 MHz, CDCl<sub>3</sub>)

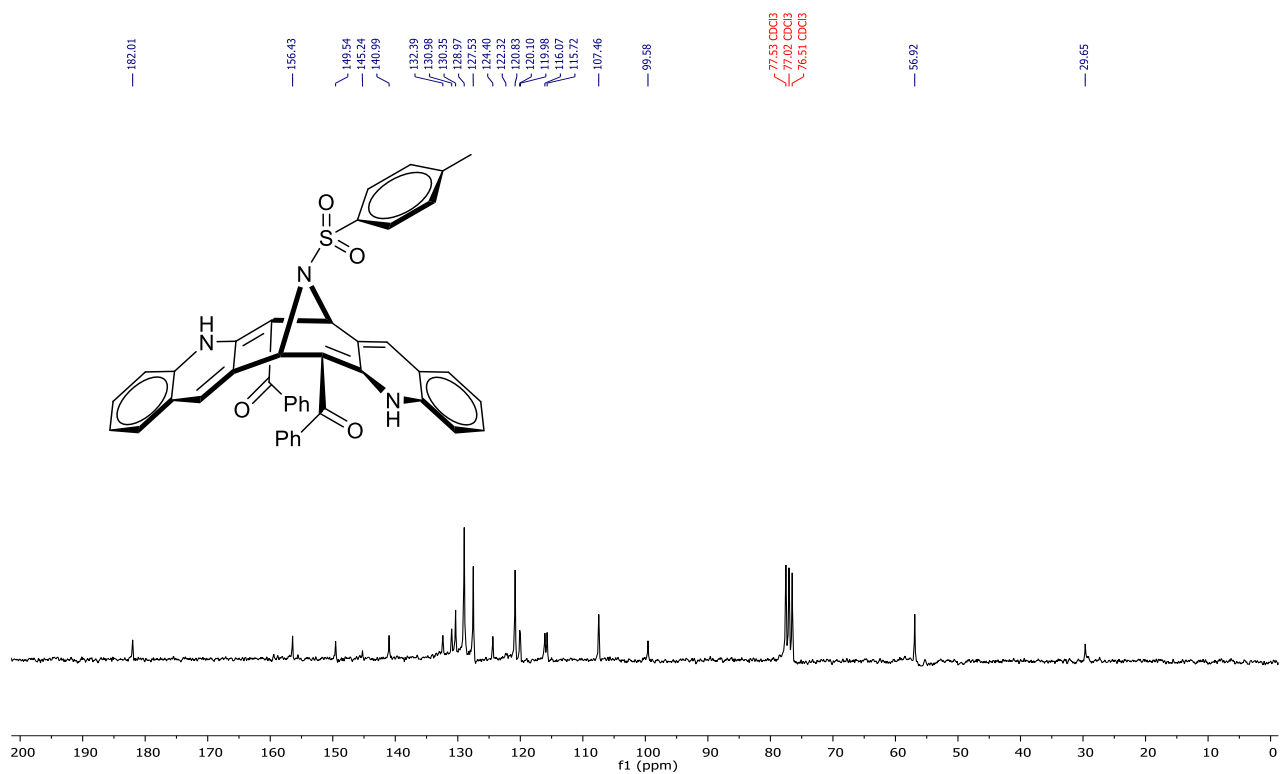

Figure S5: <sup>13</sup>C{<sup>1</sup>H}NMR Compound **3b** (63 MHz, CDCl<sub>3</sub>)

## Supporting Information

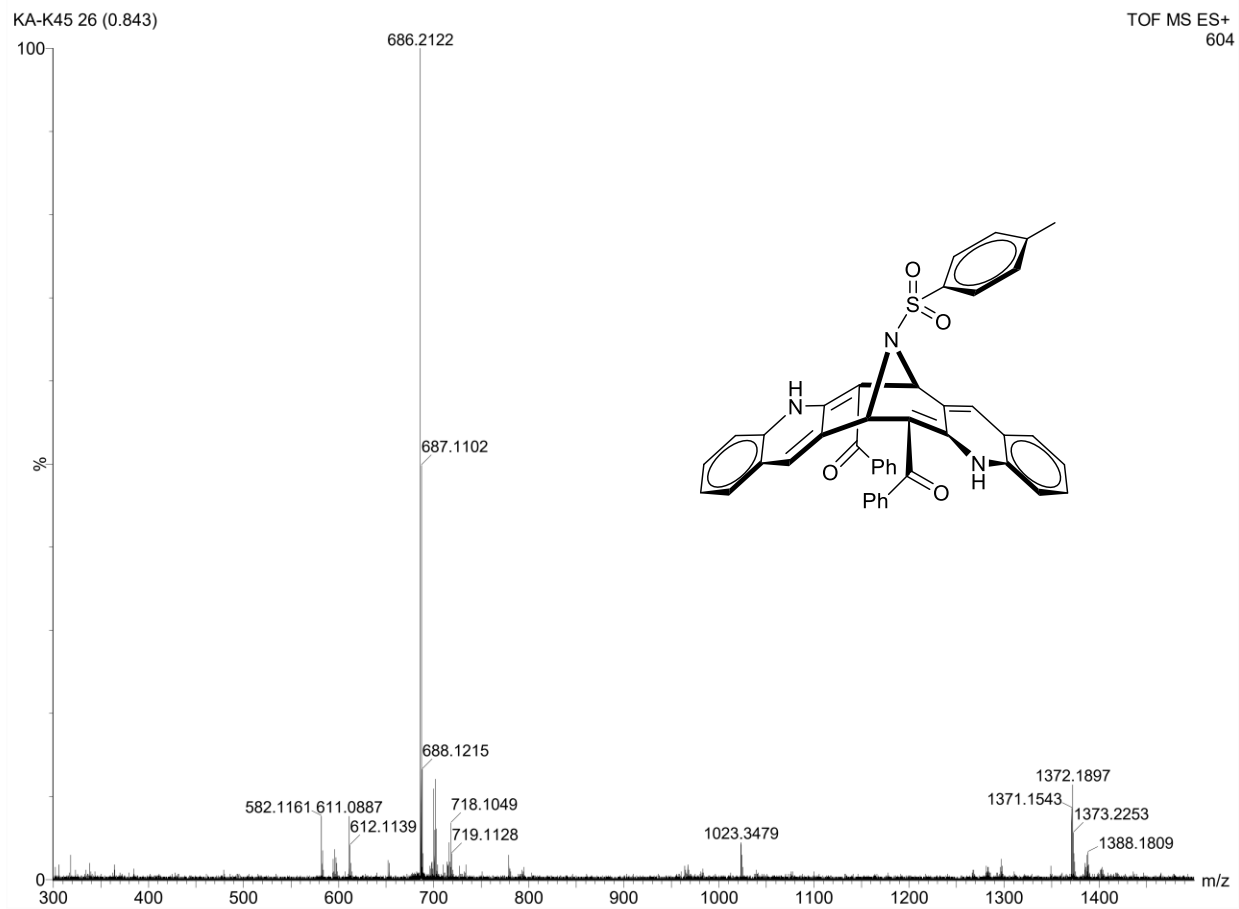

Figure S6: HRMS (ESI) of **3b**

Supporting Information

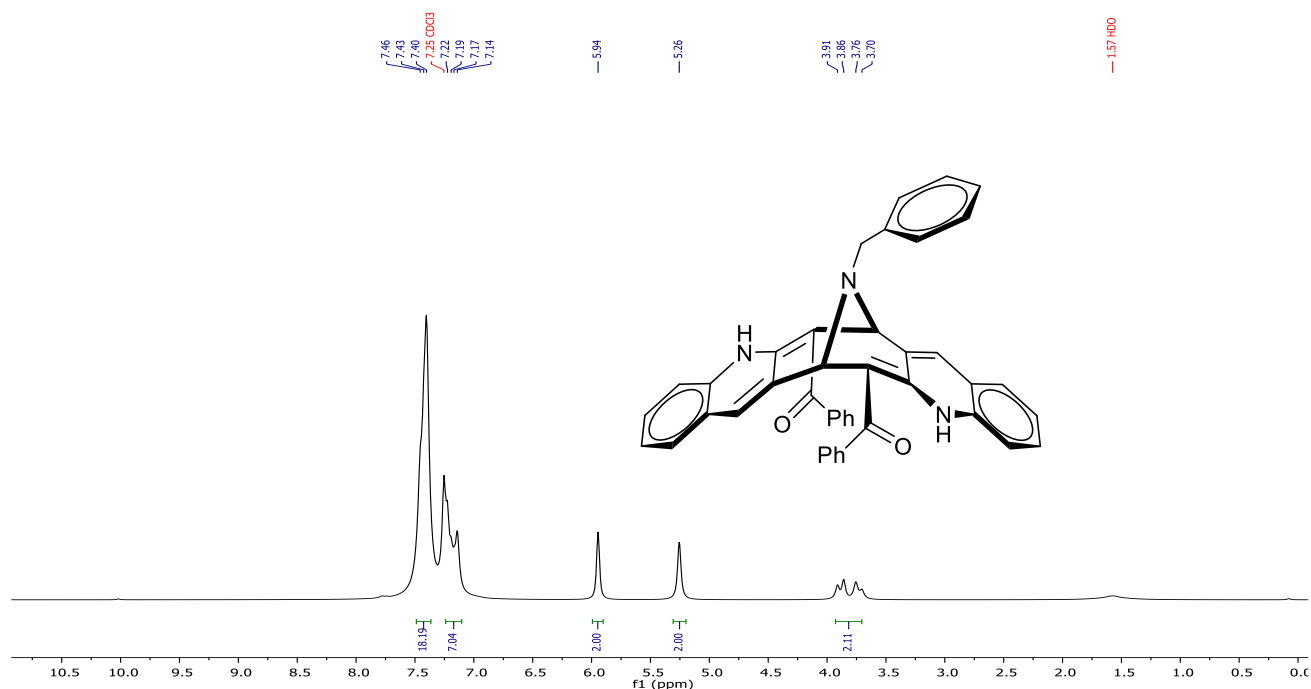

Figure S7:  $^1\text{H}$  NMR Compound 3c (250 MHz, CDCl<sub>3</sub>)

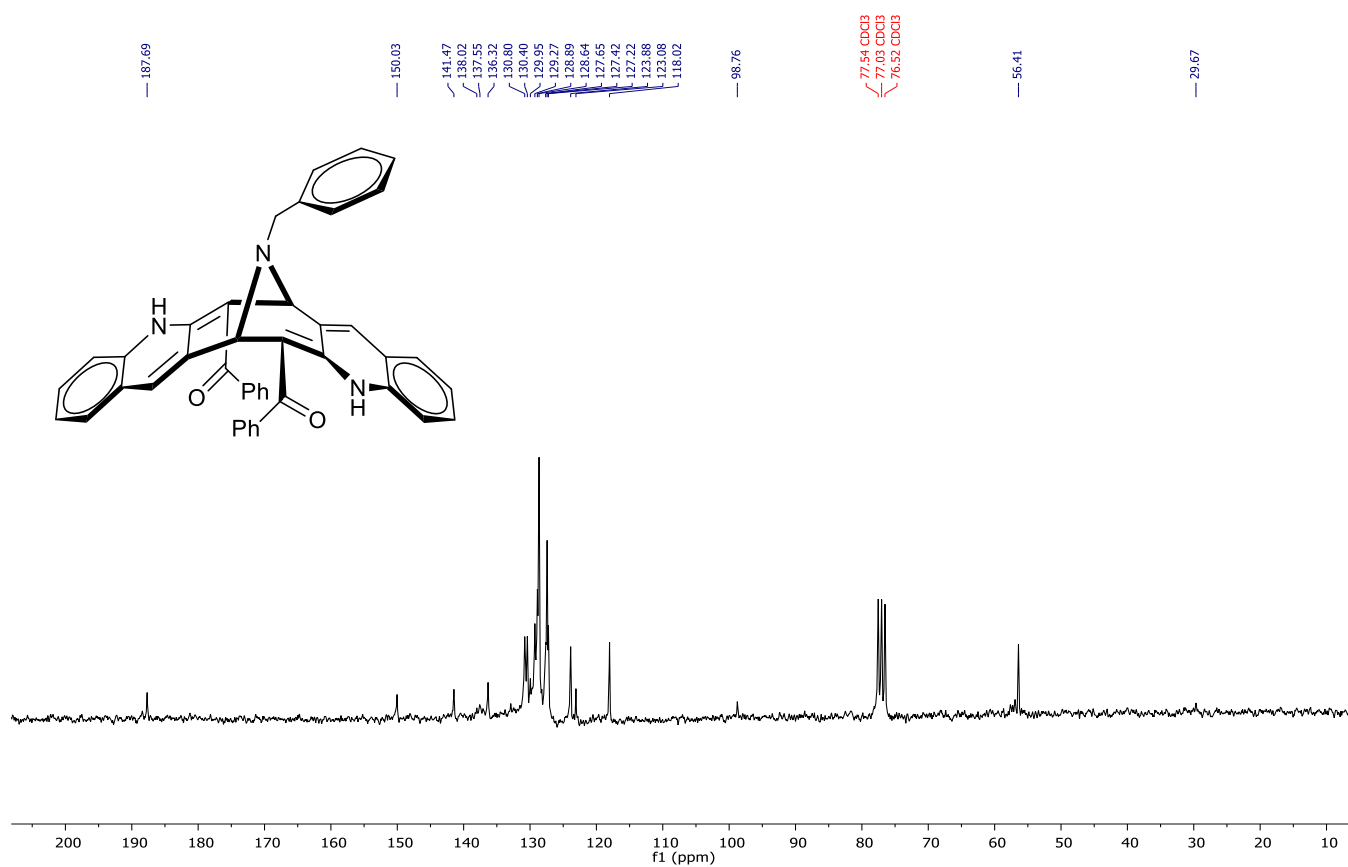

Figure S8:  $^{13}\text{C}\{^1\text{H}\}$  NMR Compound 3c (63 MHz, CDCl<sub>3</sub>)

## Supporting Information

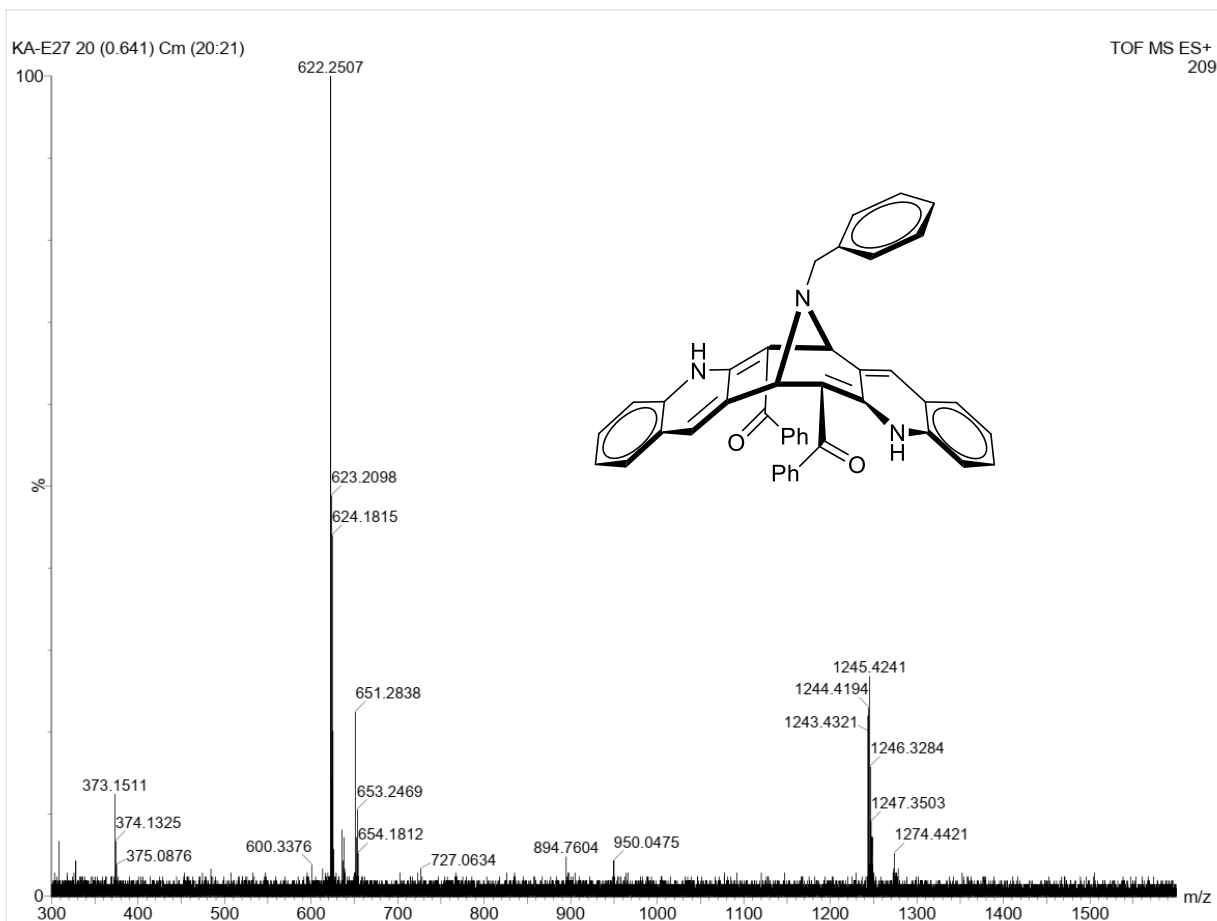

Figure S9: HRMS (ESI) of 3c

Supporting Information

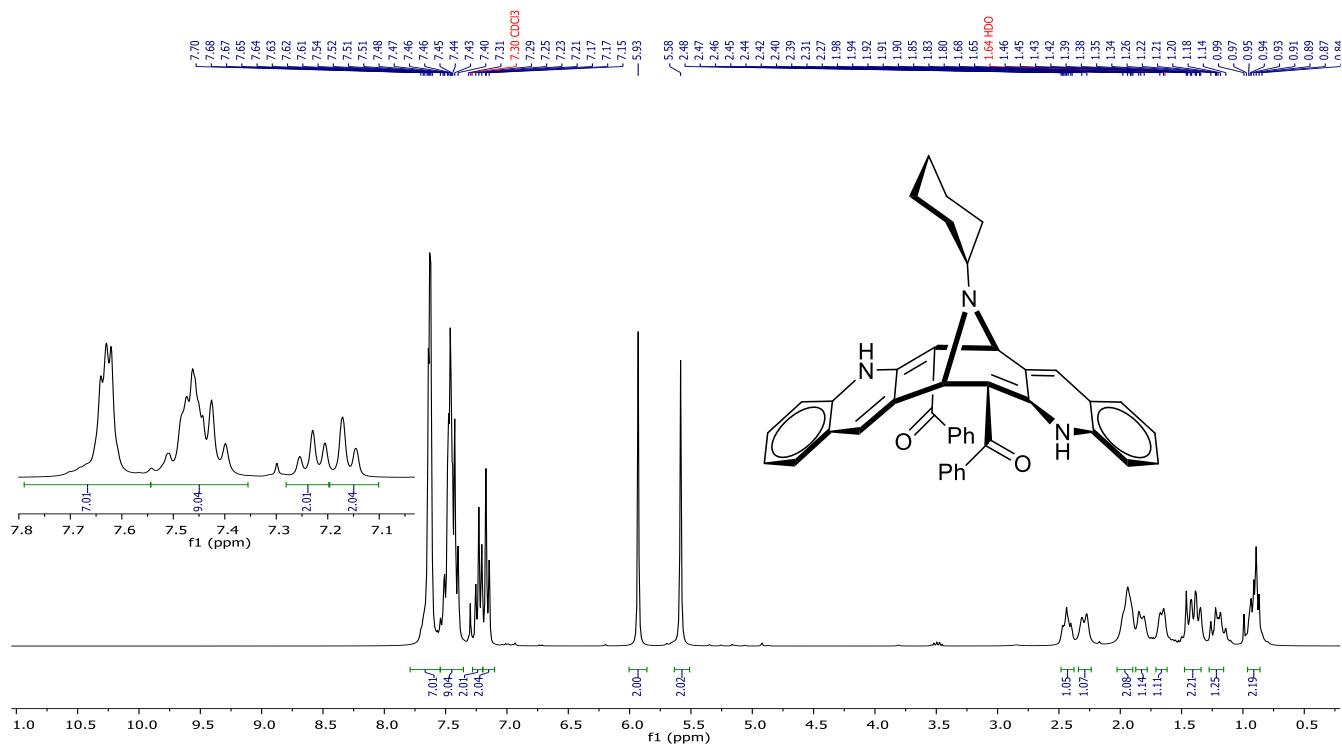

Figure S10:  $^1\text{H}$  NMR Compound 3d (300 MHz,  $\text{CDCl}_3$ )

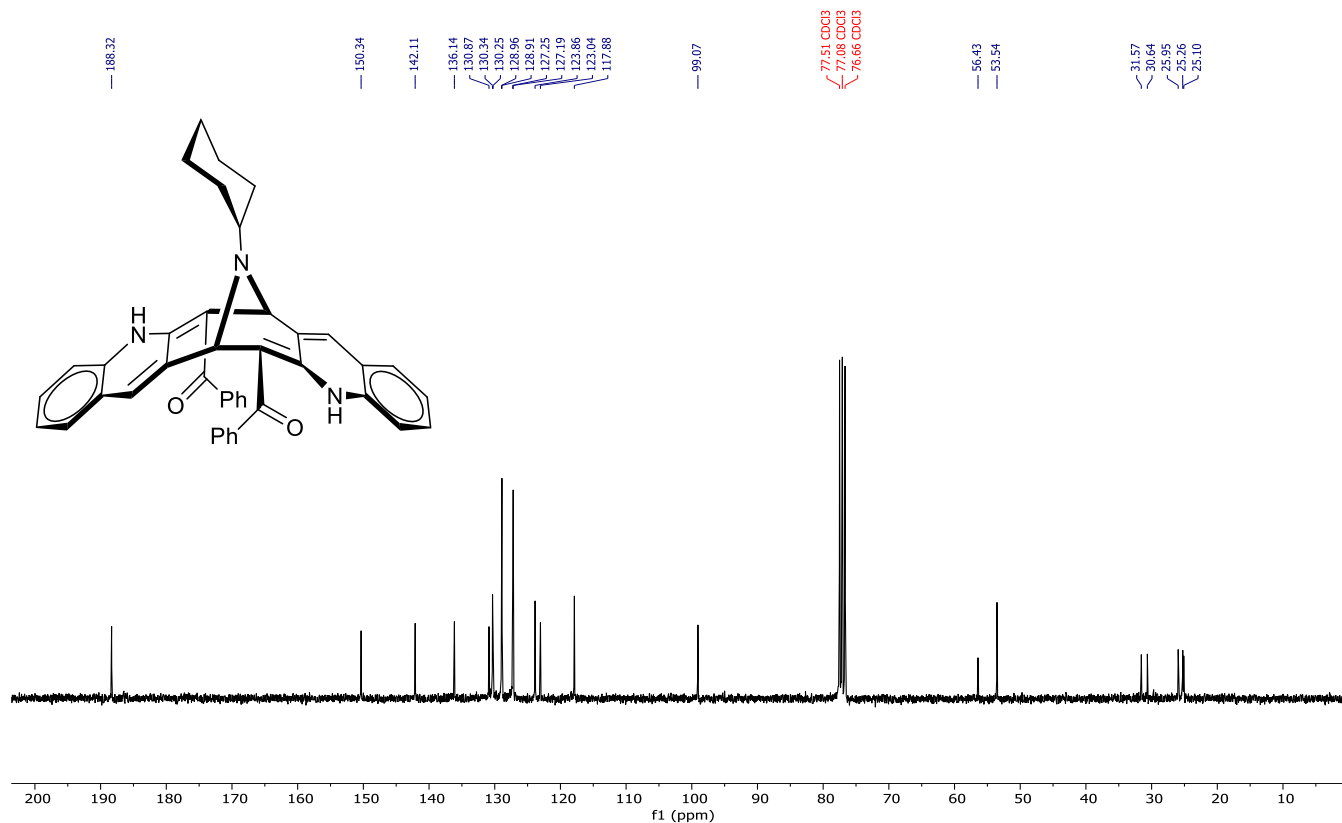

Figure S11:  $^{13}\text{C}\{^1\text{H}\}$  NMR Compound 3d (75 MHz,  $\text{CDCl}_3$ )

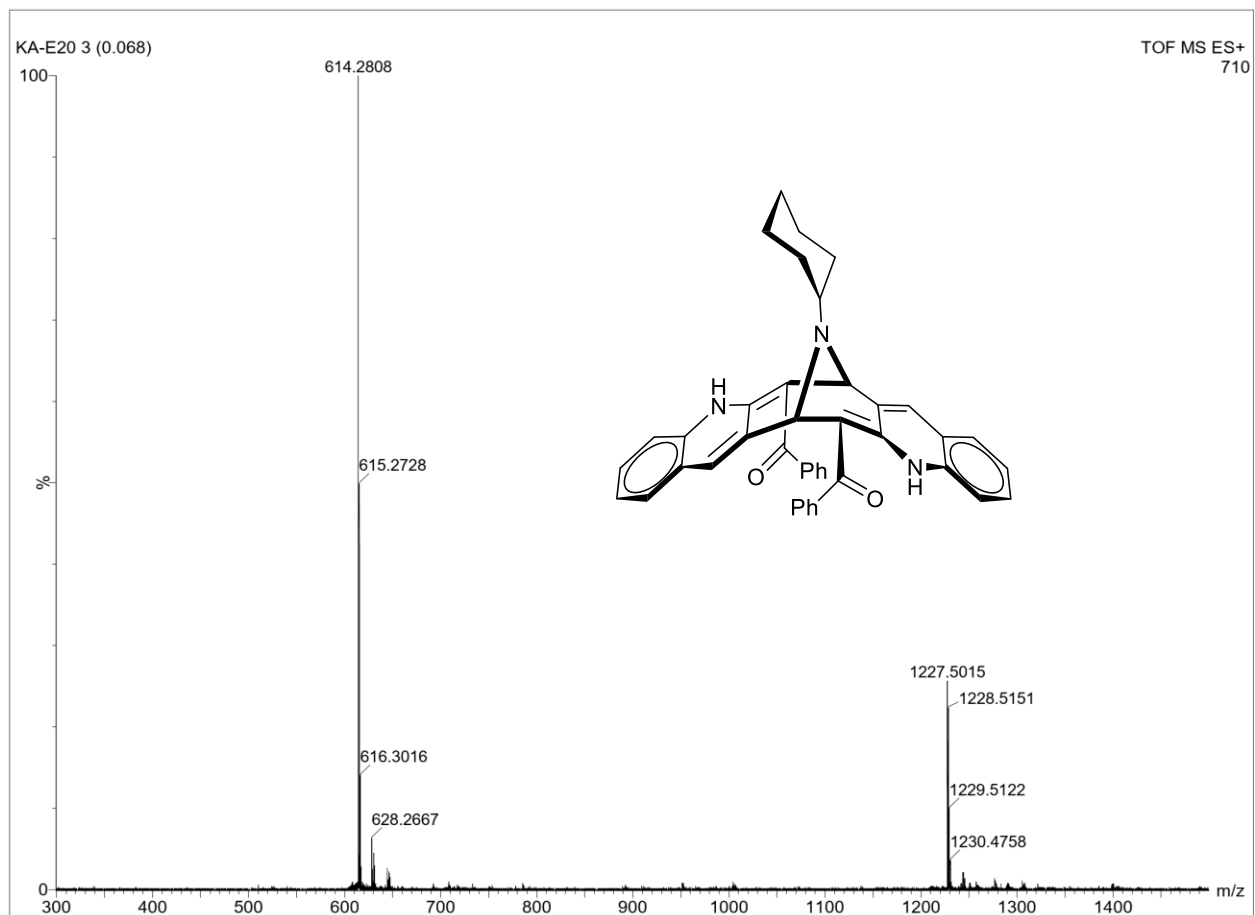Figure S12: HRMS (ESI) of **3d**



Supporting Information

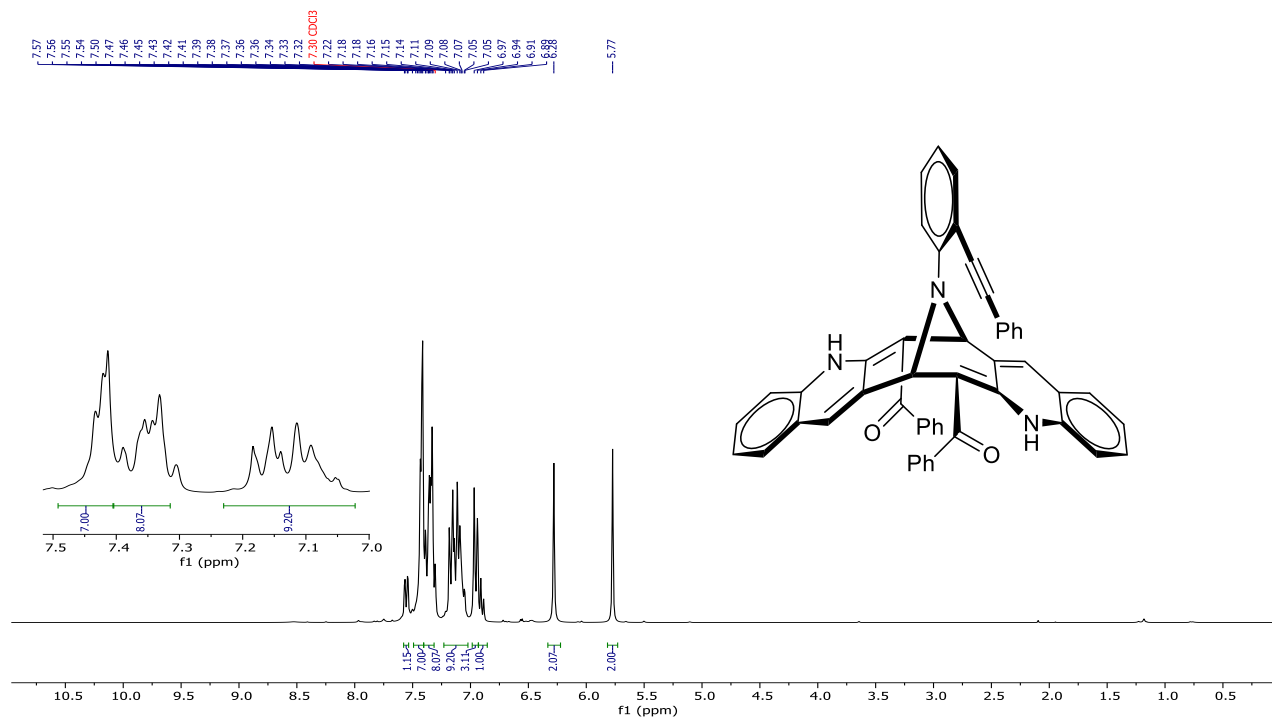

Figure S13:  $^1\text{H}$  NMR Compound **3e** (300 MHz,  $\text{CDCl}_3$ )

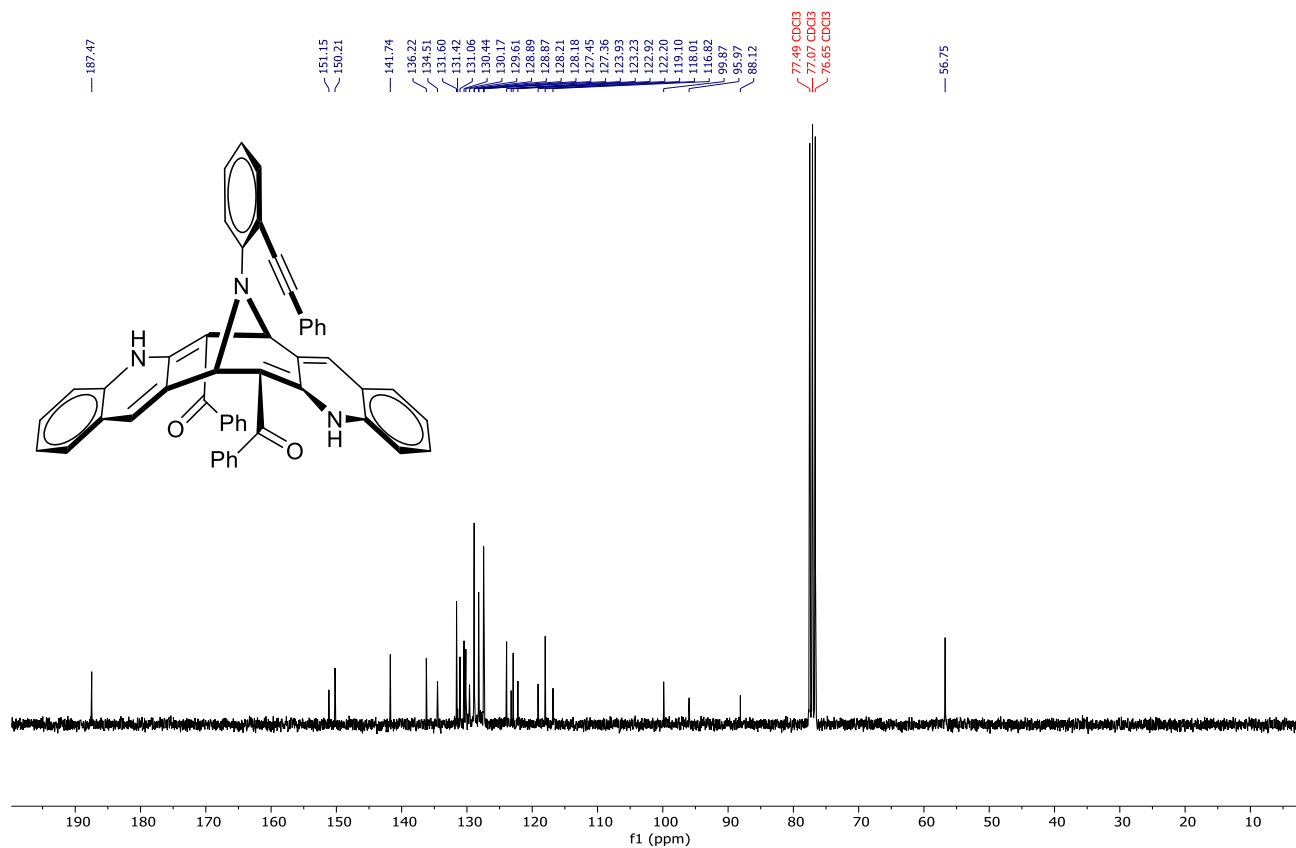

Figure S14:  $^{13}\text{C}\{^1\text{H}\}$  NMR Compound **3e** (75 MHz,  $\text{CDCl}_3$ )

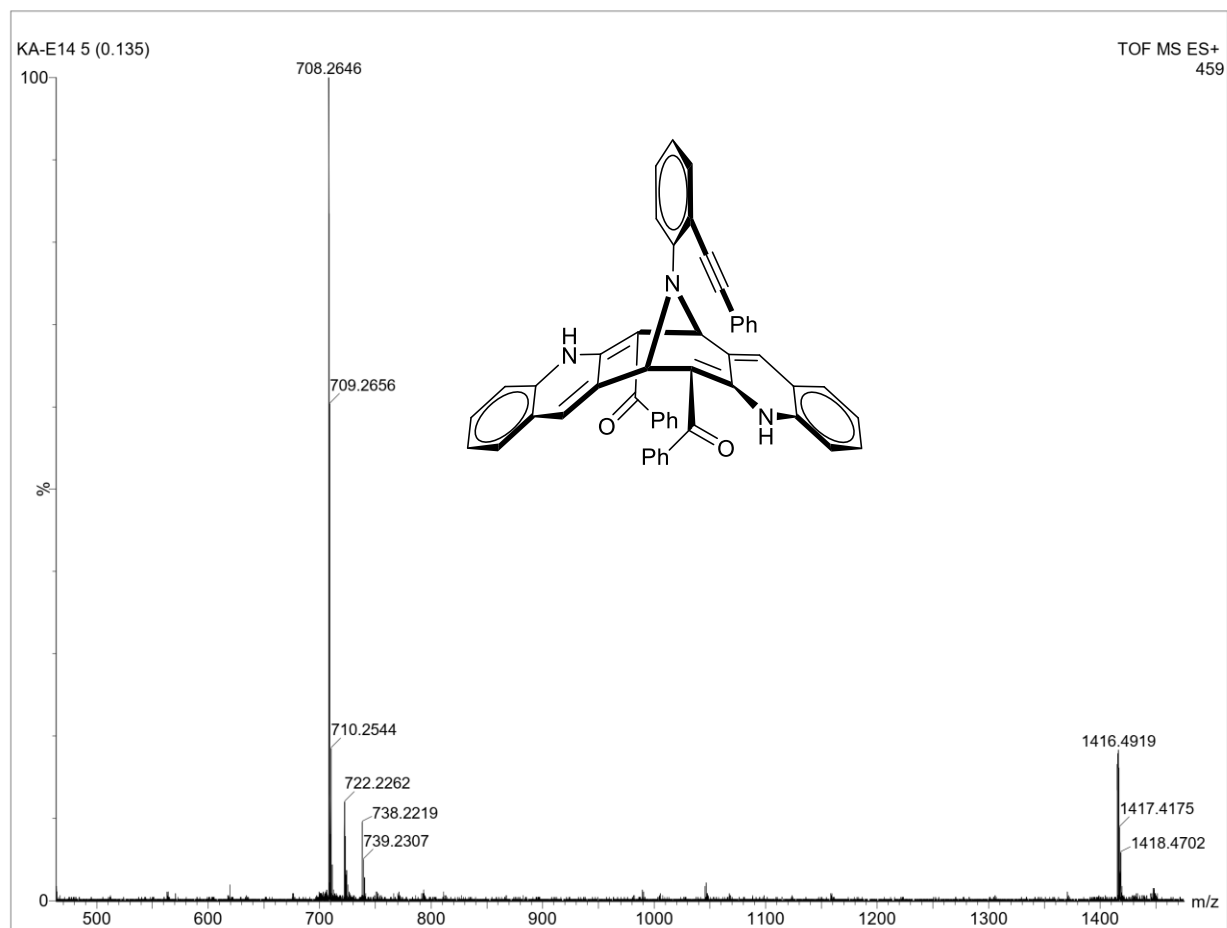Figure S15: HRMS (ESI) of **3e**

Supporting Information

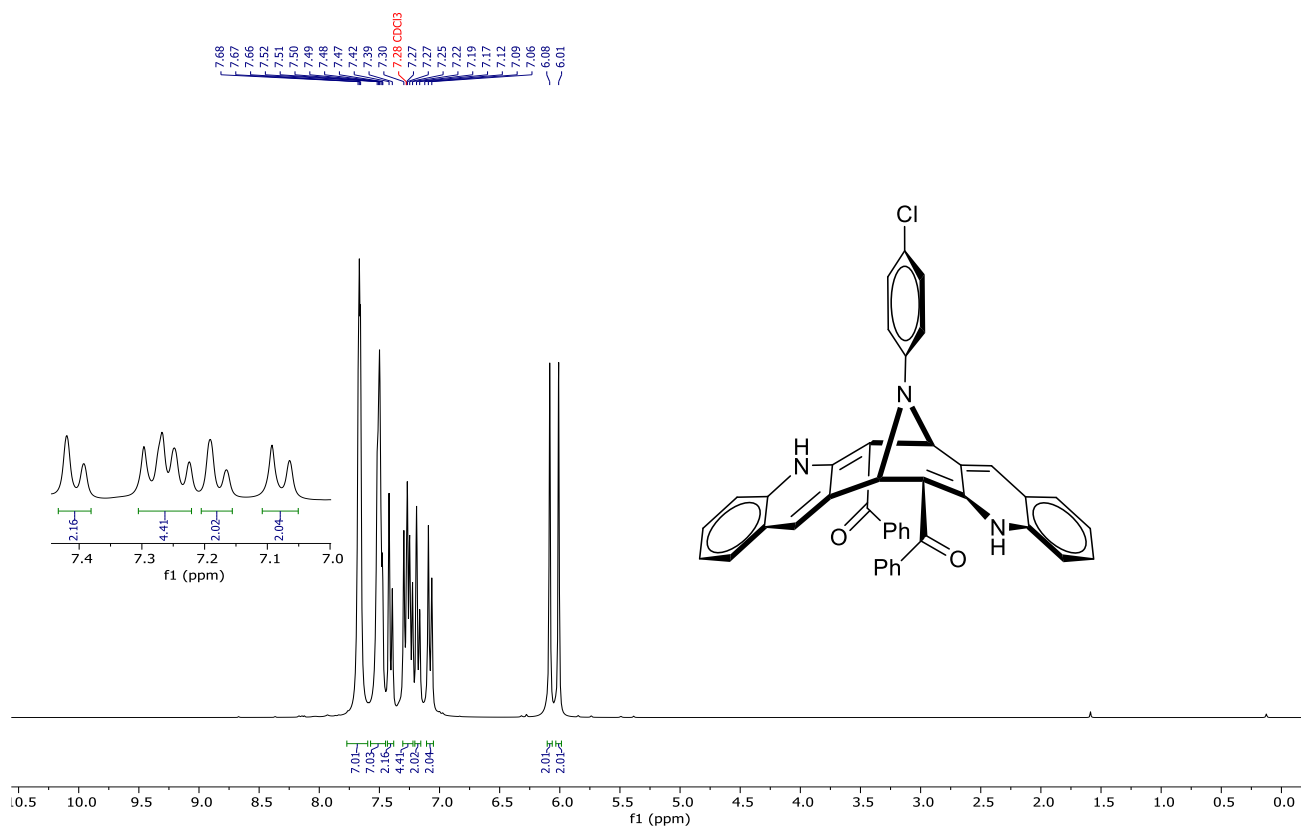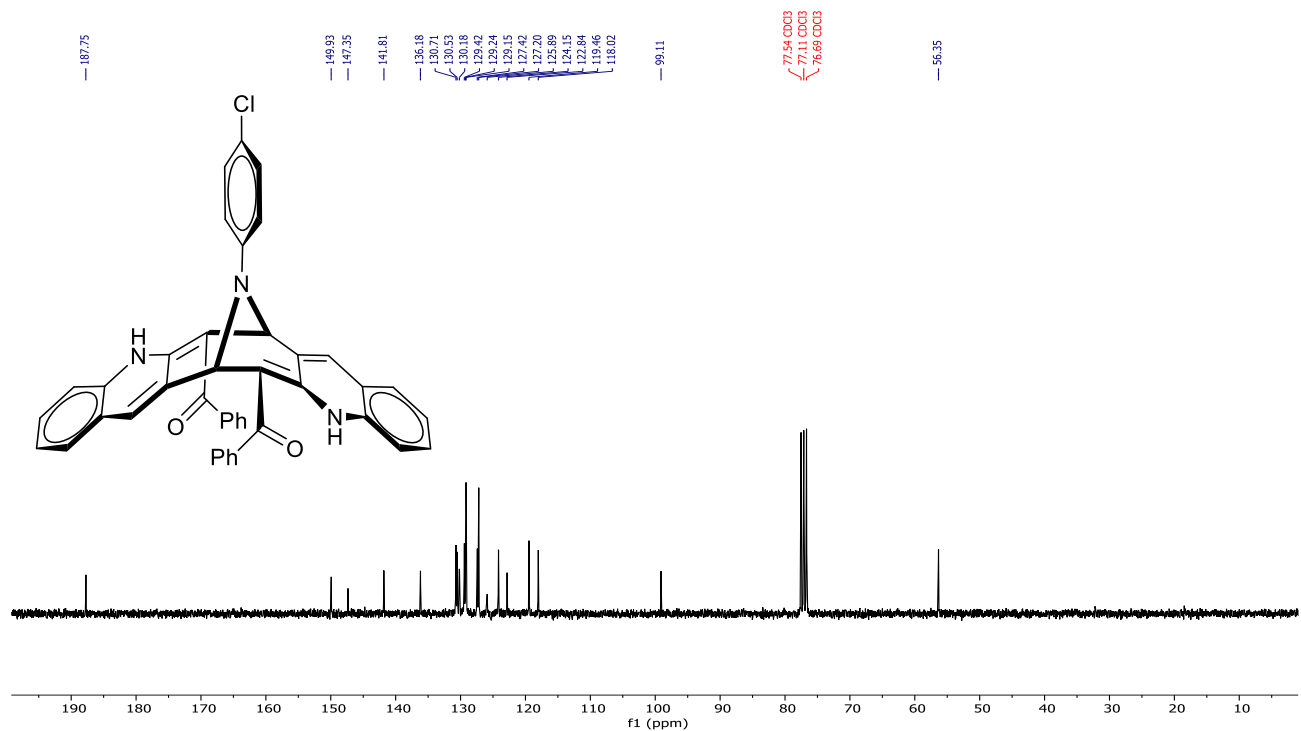

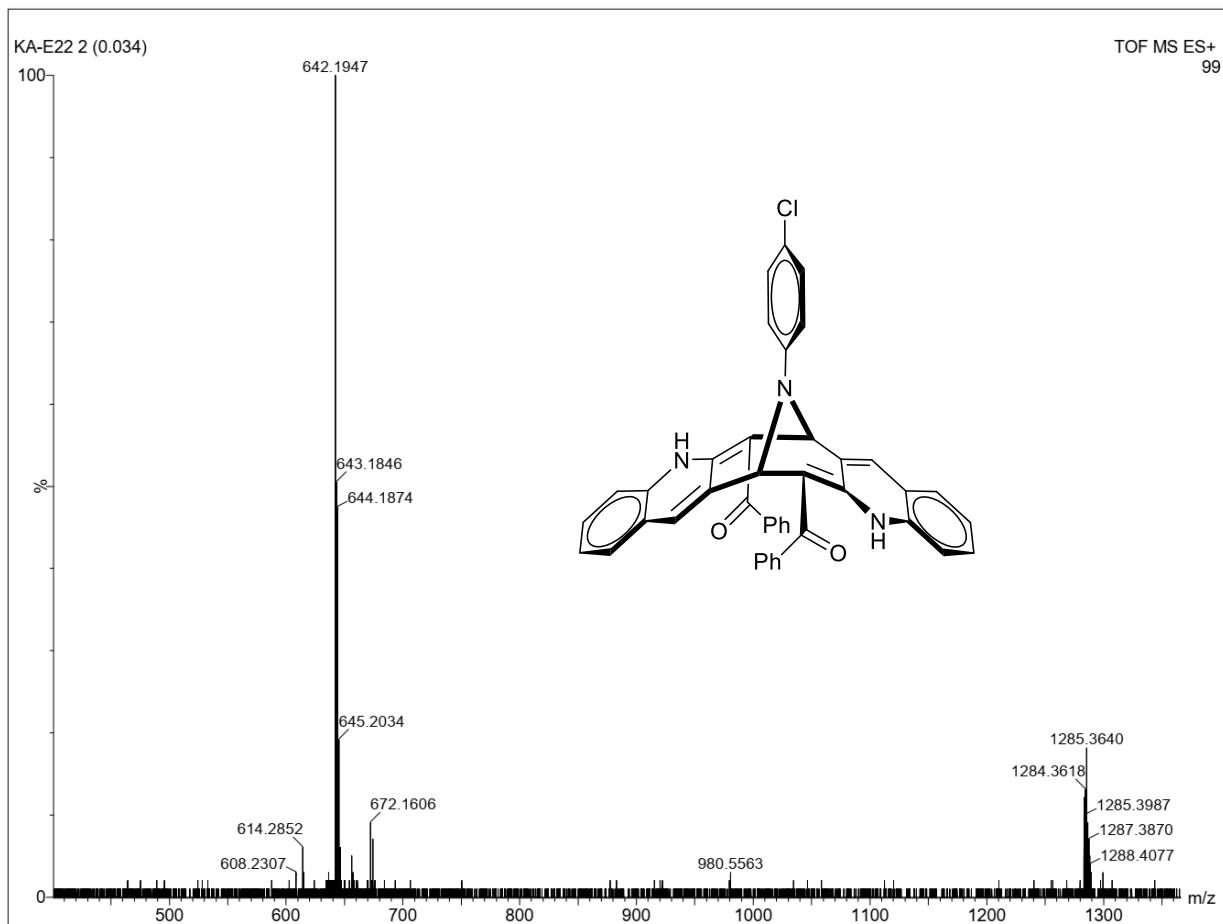

Figure S18: HRMS (ESI) of 3f

Supporting Information

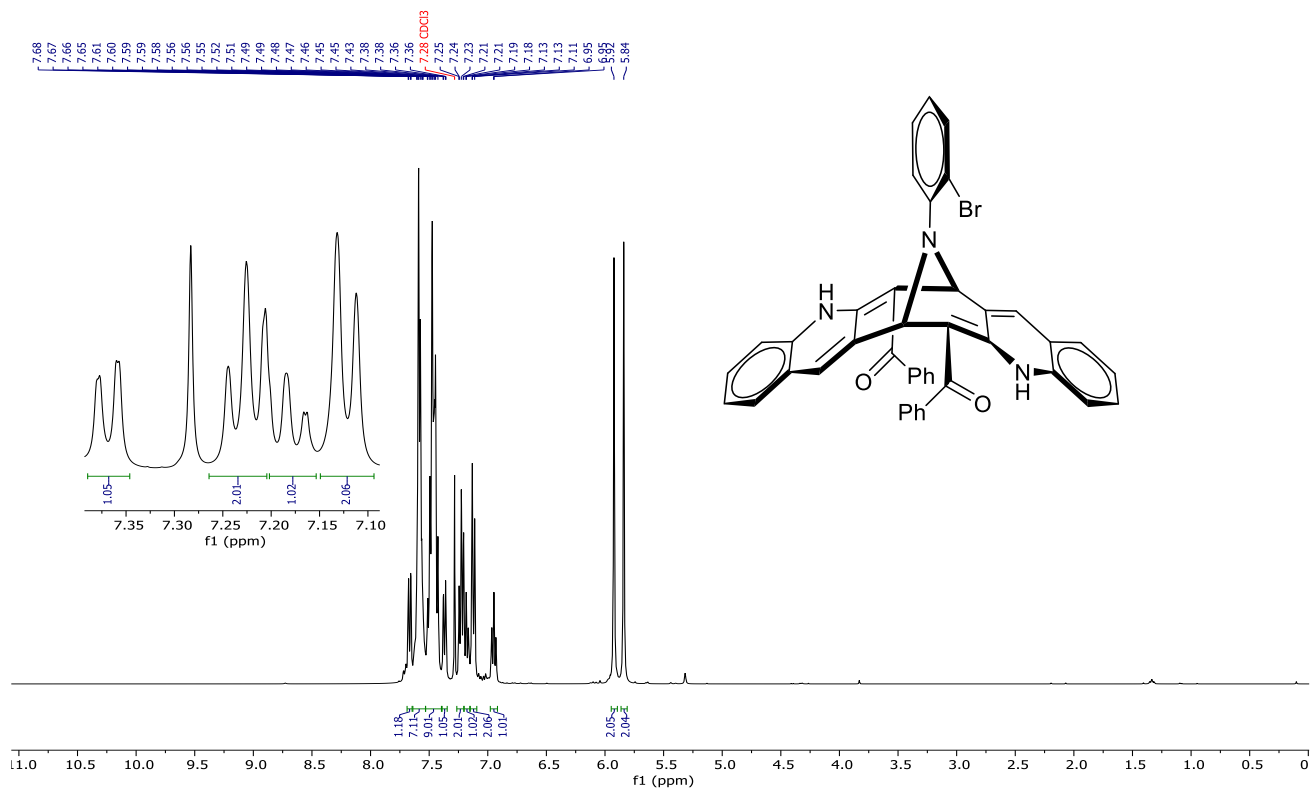

Figure S19:  $^1\text{H NMR}$  Compound **3g** (400 MHz,  $\text{CDCl}_3$ )

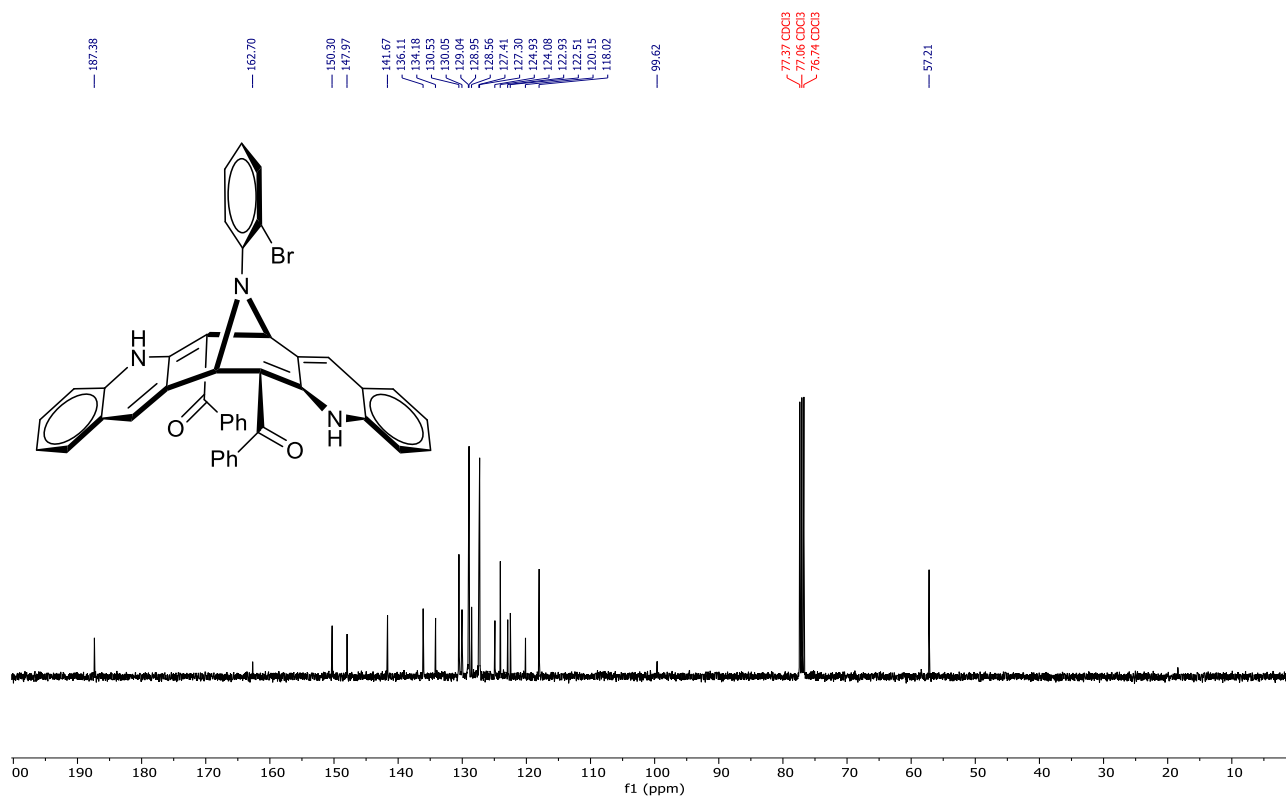

Figure S20:  $^{13}\text{C}\{^1\text{H}\}$  NMR Compound **3g** (101 MHz,  $\text{CDCl}_3$ )

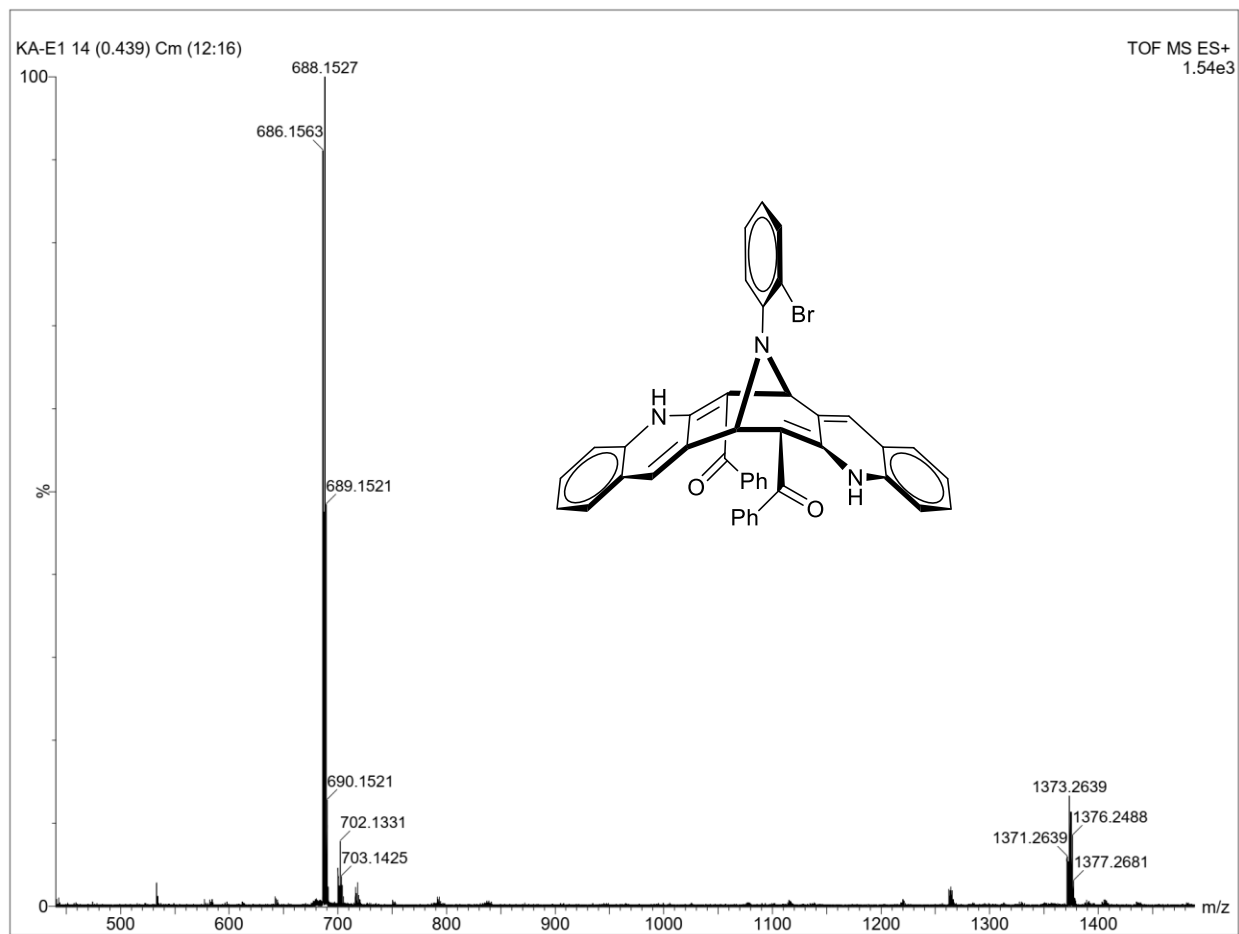Figure S21: HRMS (ESI) of **3g**

Supporting Information

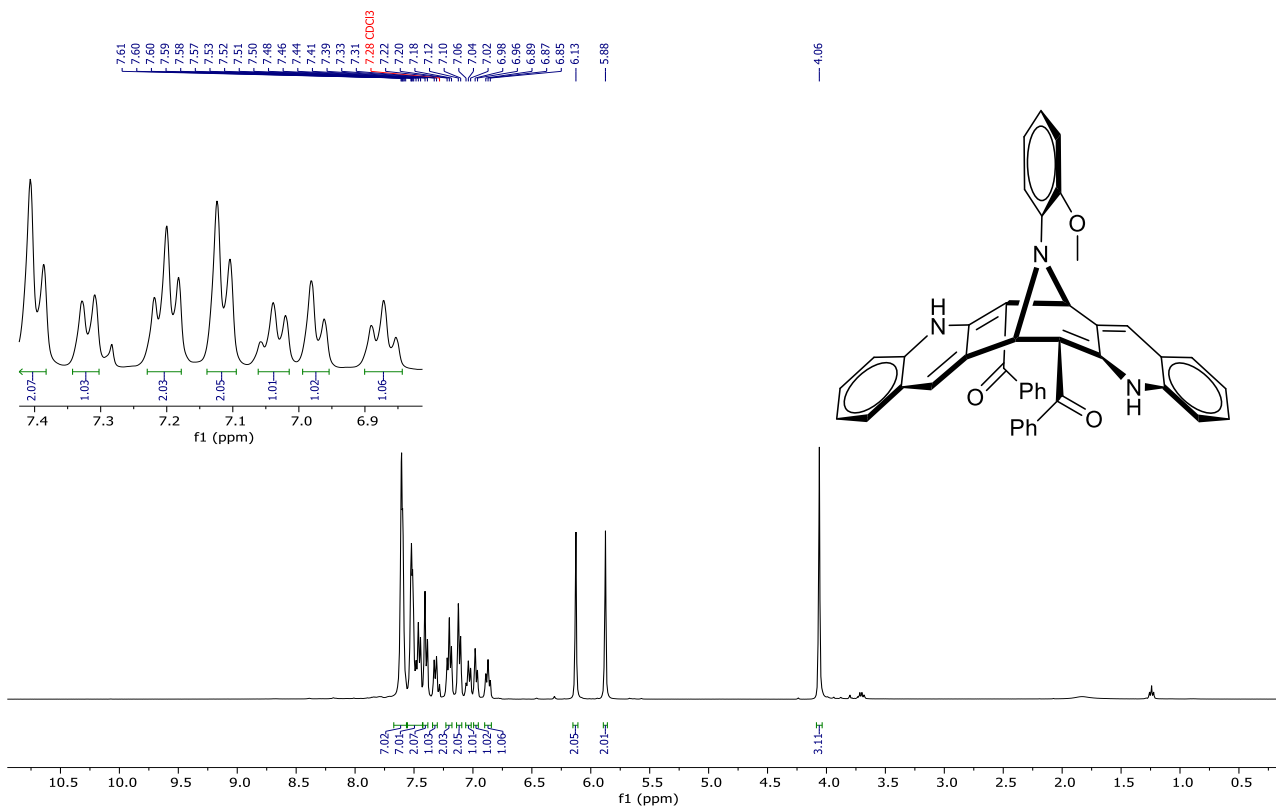

Figure S22:  $^1\text{H NMR}$  Compound 3h (400 MHz,  $\text{CDCl}_3$ )

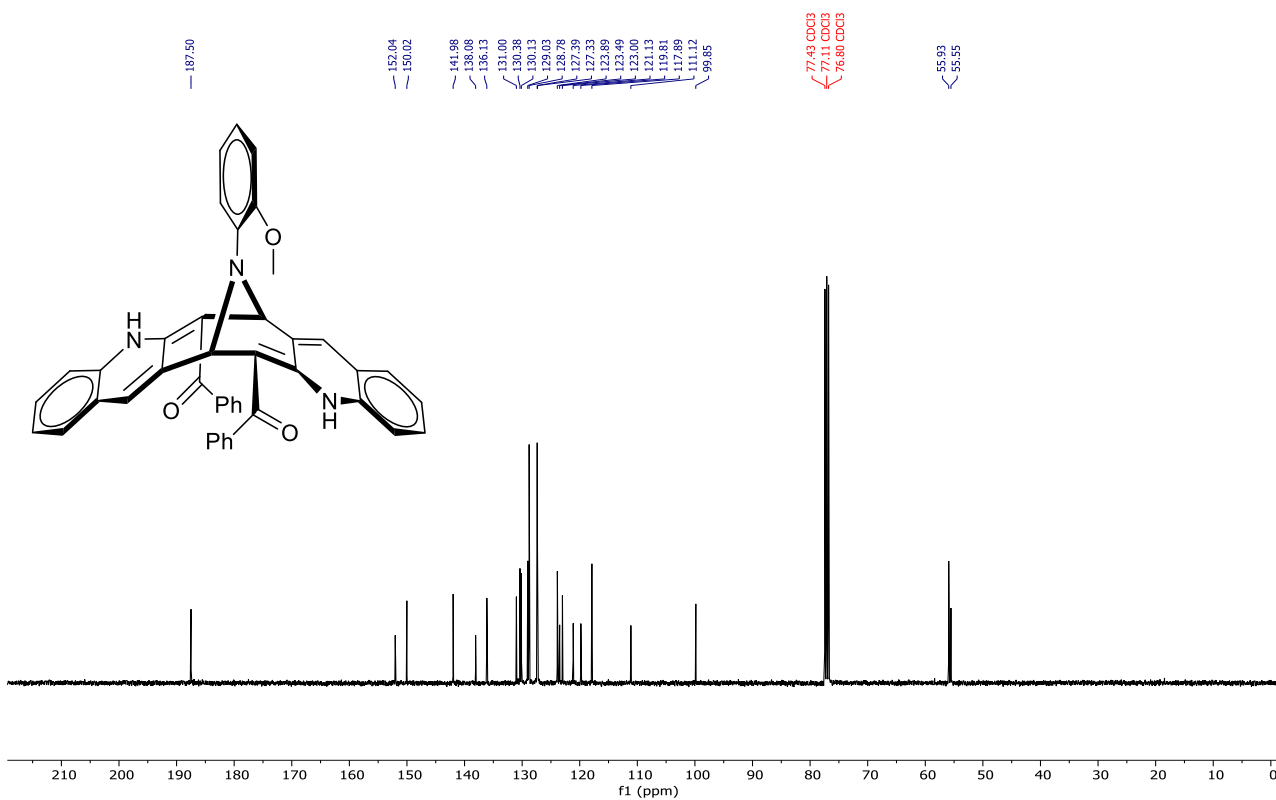

Figure S23:  $^{13}\text{C}\{^1\text{H}\}$  NMR Compound 3h (101 MHz,  $\text{CDCl}_3$ )

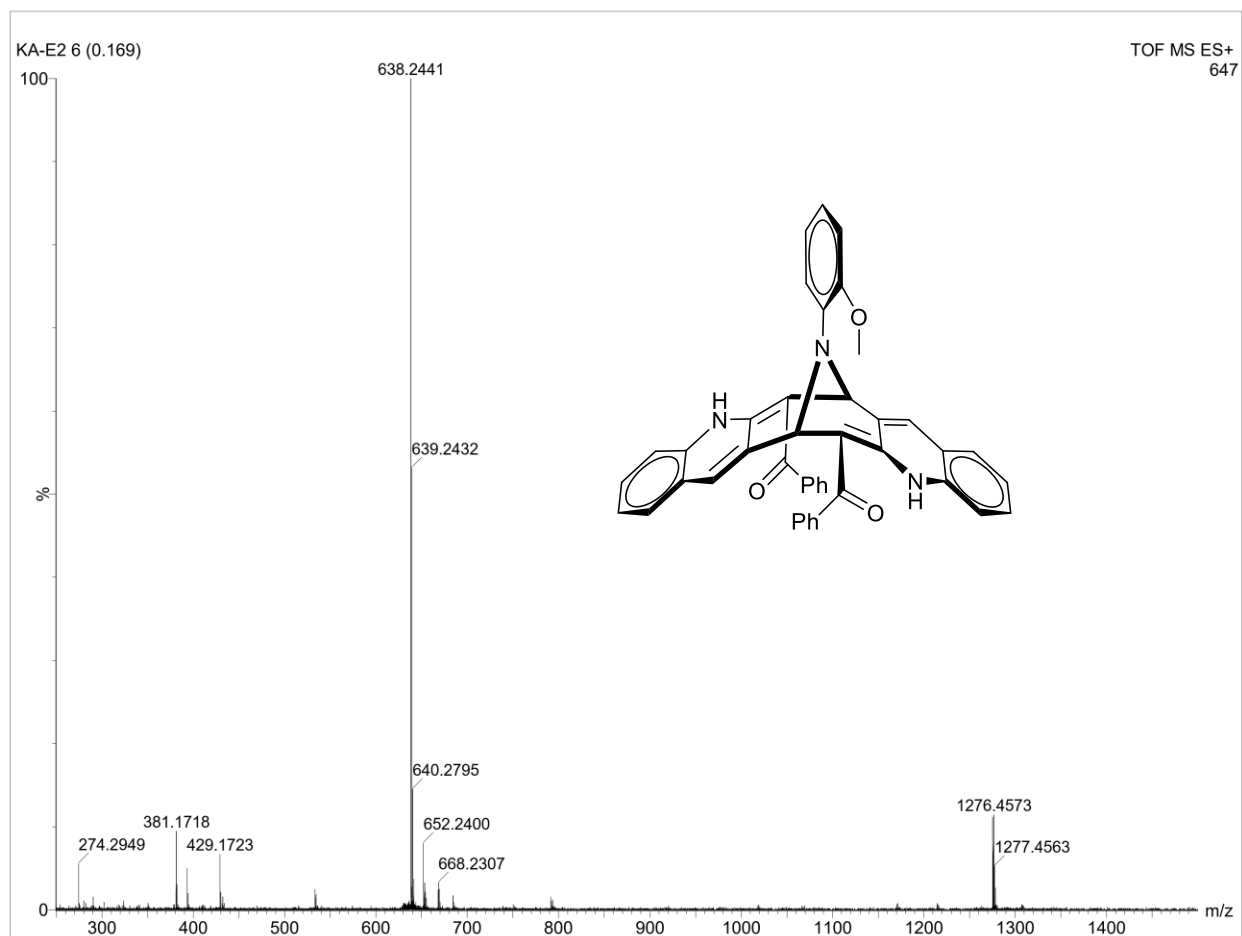Figure S24: HRMS (ESI) of **3h**



Supporting Information

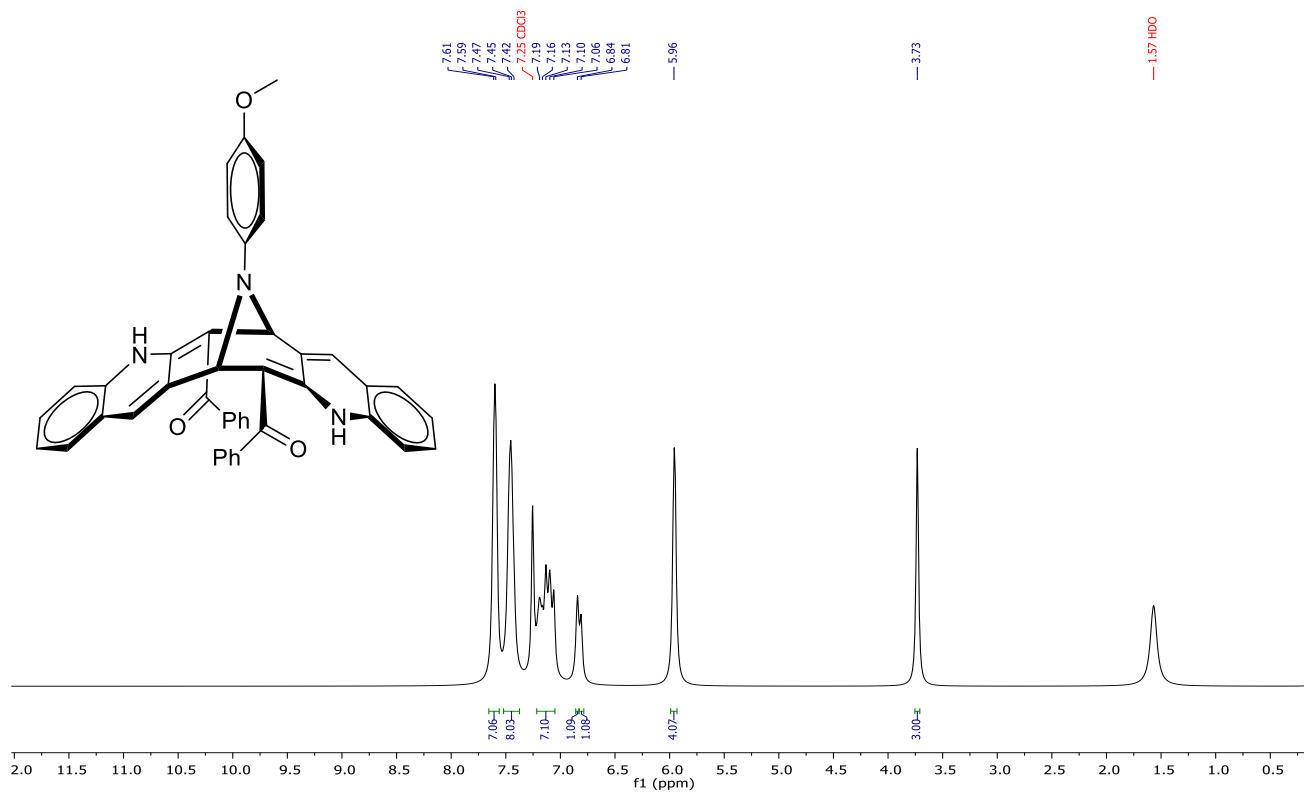

Figure S25: <sup>1</sup>H NMR Compound **3i** (250 MHz, CDCl<sub>3</sub>)

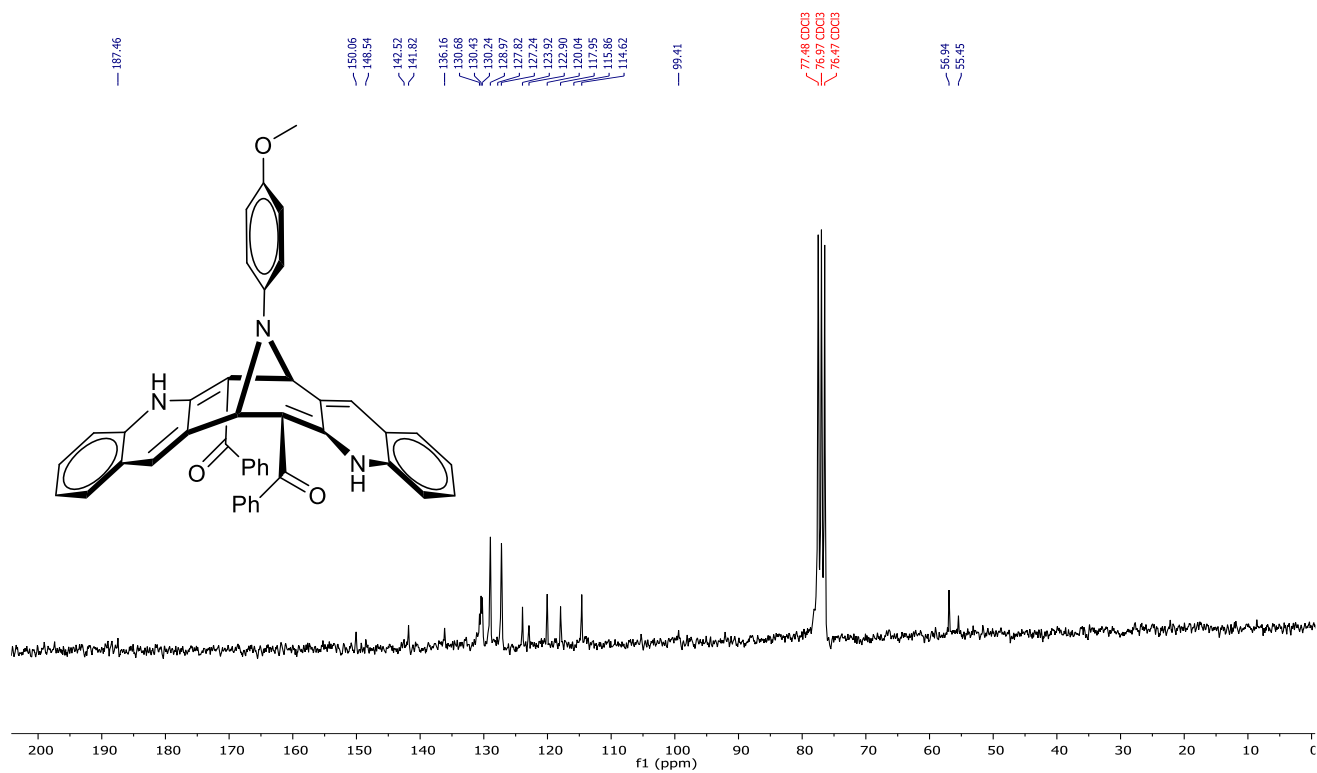

Figure S26: <sup>13</sup>C{<sup>1</sup>H}NMR Compound **3i** (63 MHz, CDCl<sub>3</sub>)

## Supporting Information

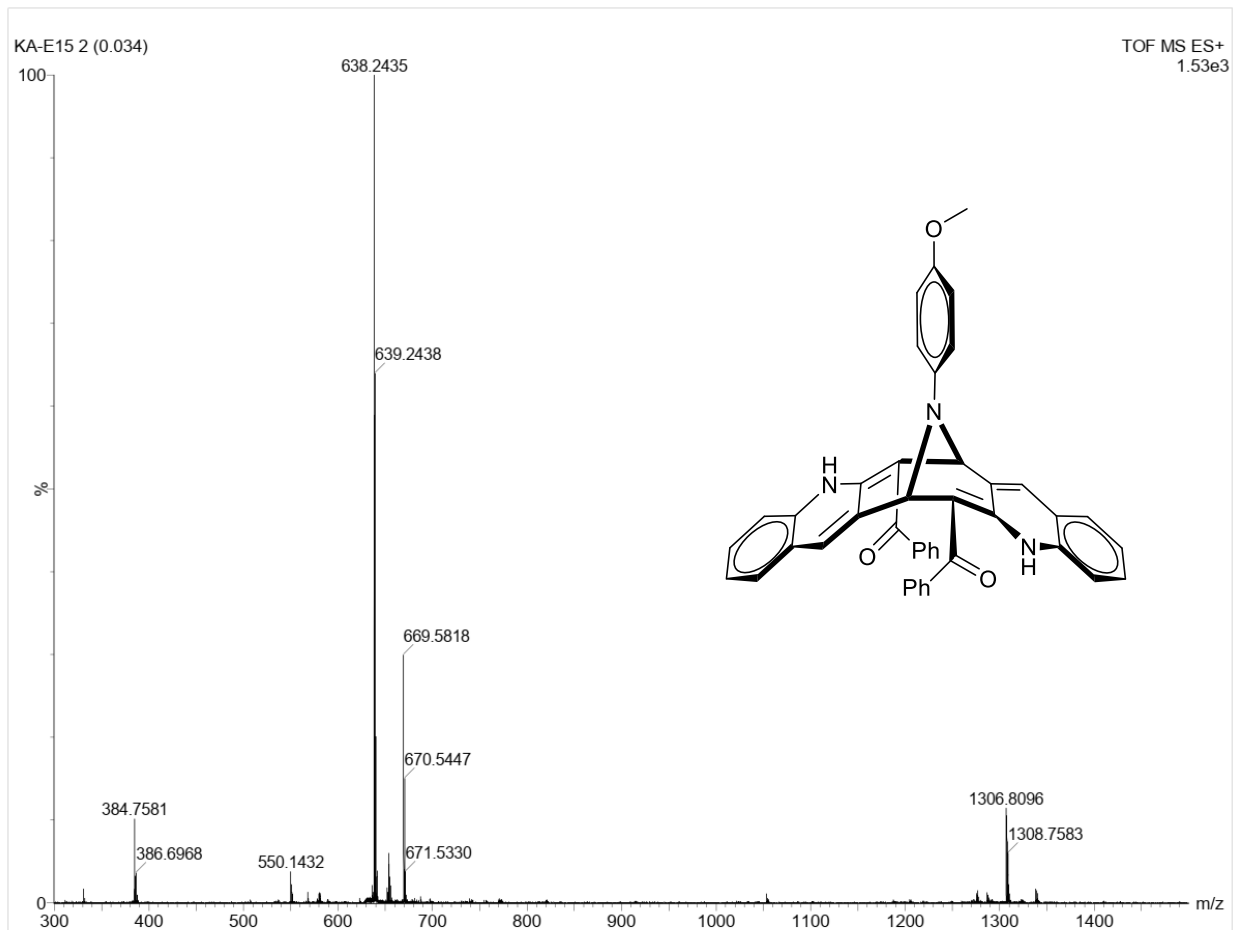

Figure S27: HRMS (ESI) of **3i**

Supporting Information

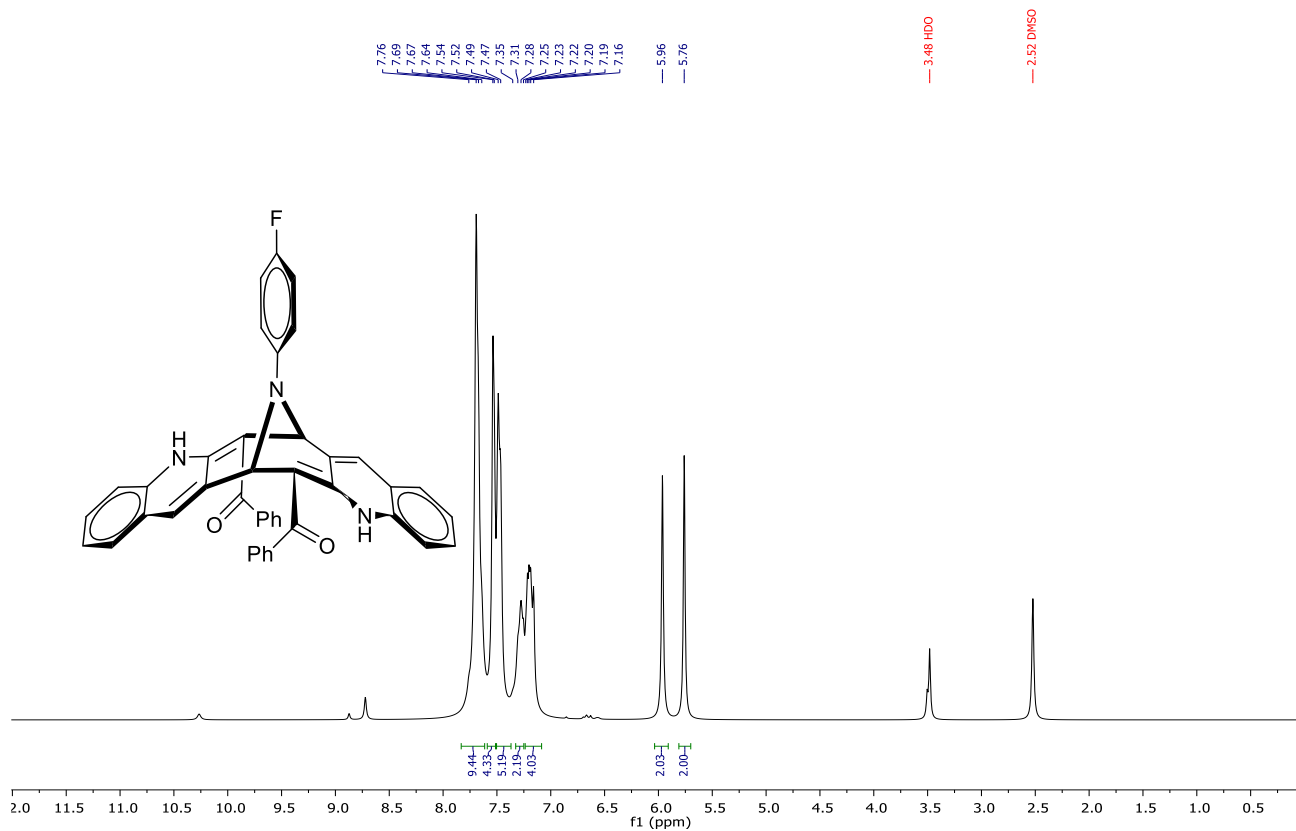

Figure S28: <sup>1</sup>H NMR Compound 3j (300 MHz, DMSO-*d*<sub>6</sub>)

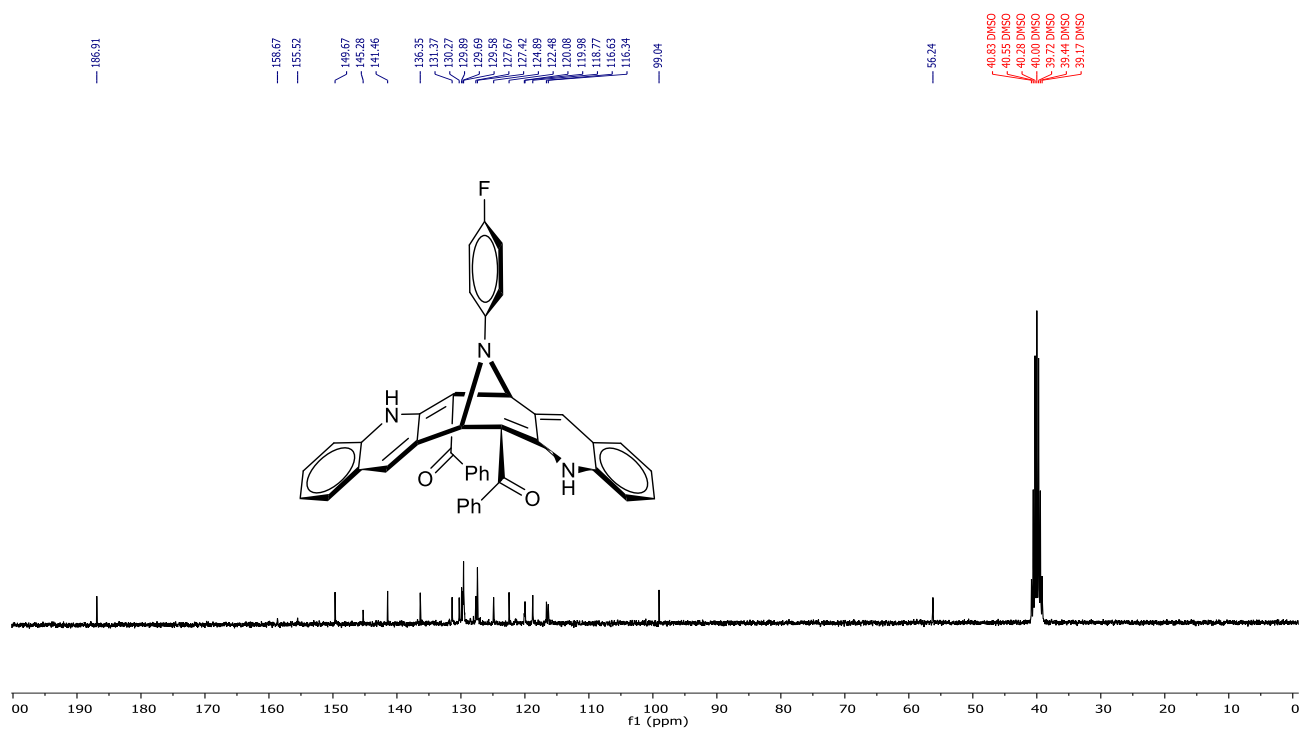

Figure S29: <sup>13</sup>C{<sup>1</sup>H} NMR Compound 3j (76 MHz, DMSO-*d*<sub>6</sub>)

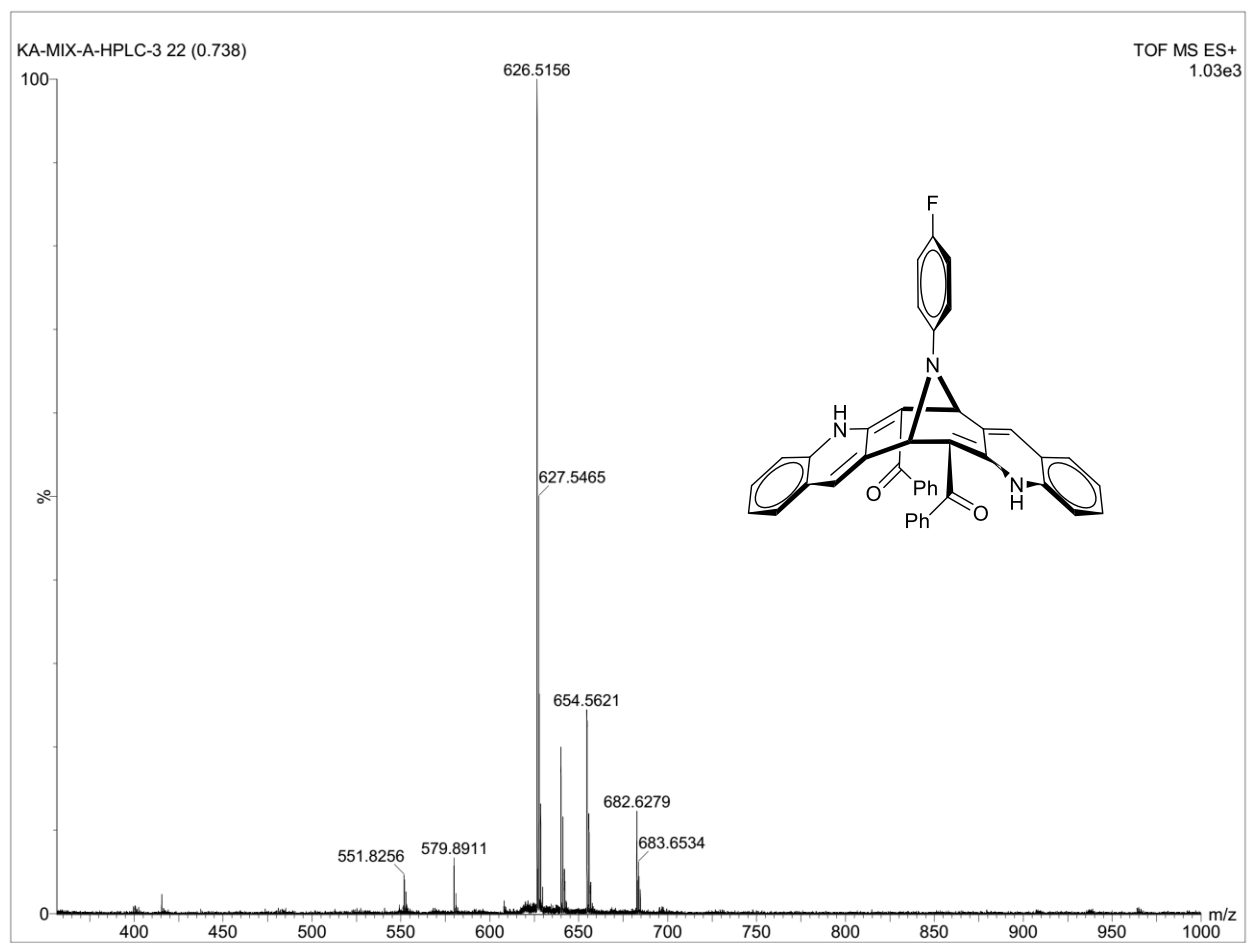Figure S30: HRMS (ESI) of **3j**

Supporting Information

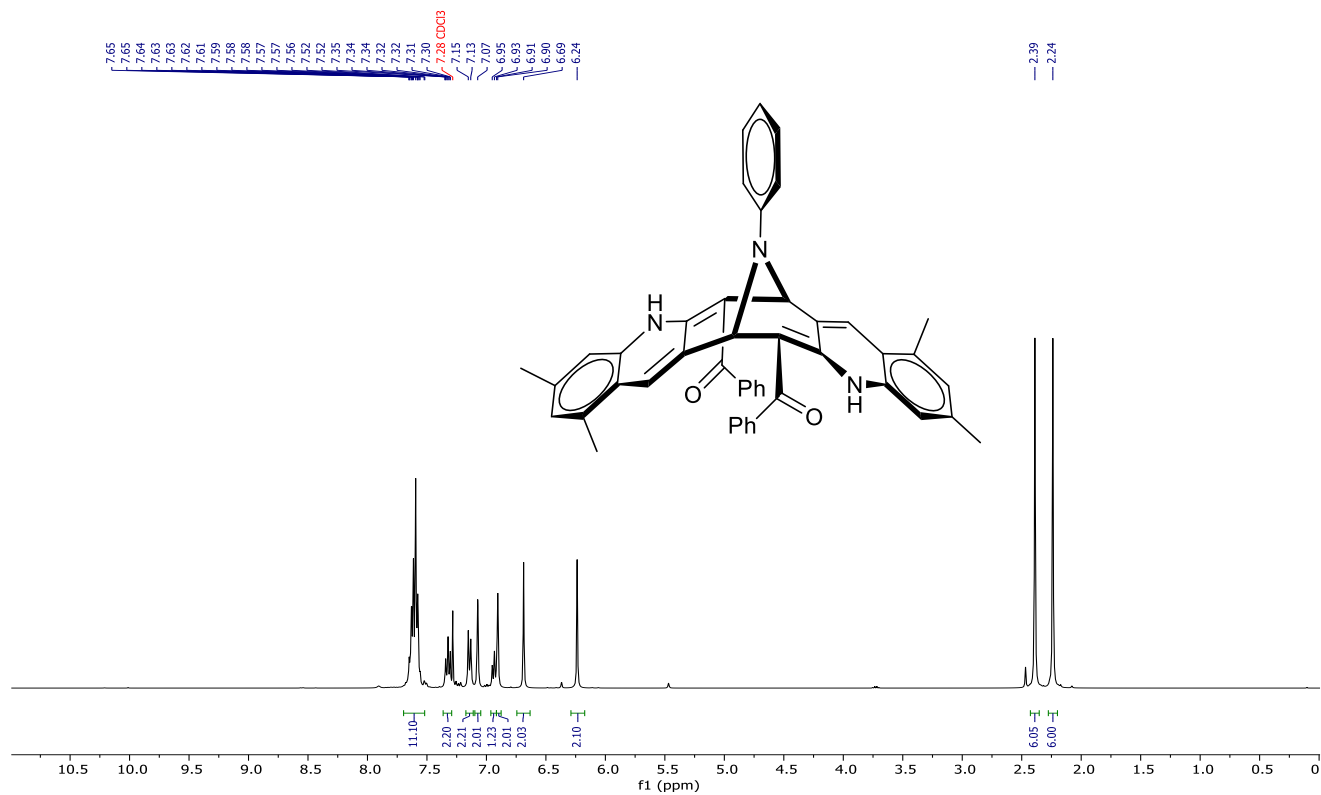

Figure S31:  $^1\text{H}$  NMR Compound 3k (400 MHz,  $\text{CDCl}_3$ )

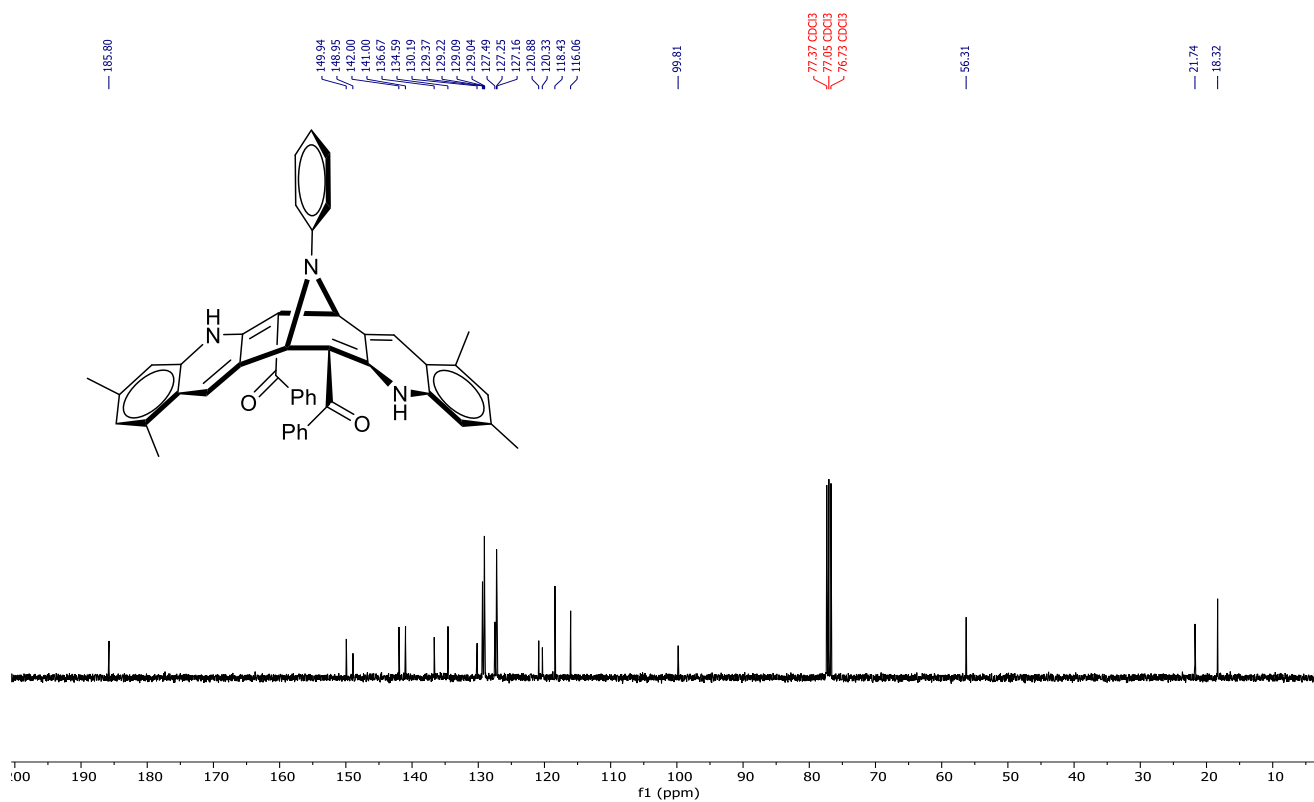

Figure S32:  $^{13}\text{C}\{^1\text{H}\}$  NMR Compound 3k (101 MHz,  $\text{CDCl}_3$ )

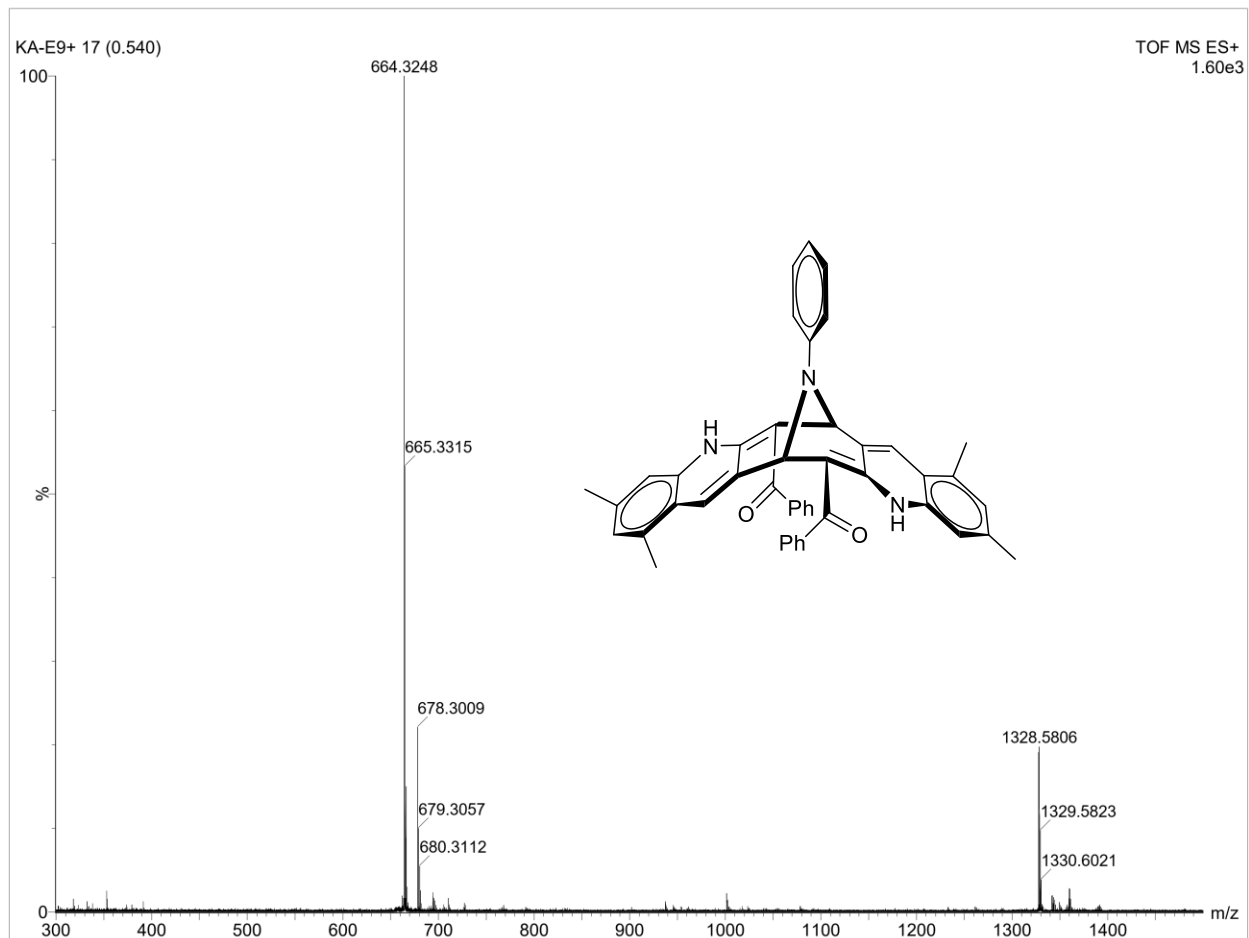Figure S33: HRMS (ESI) of **3k**

Supporting Information

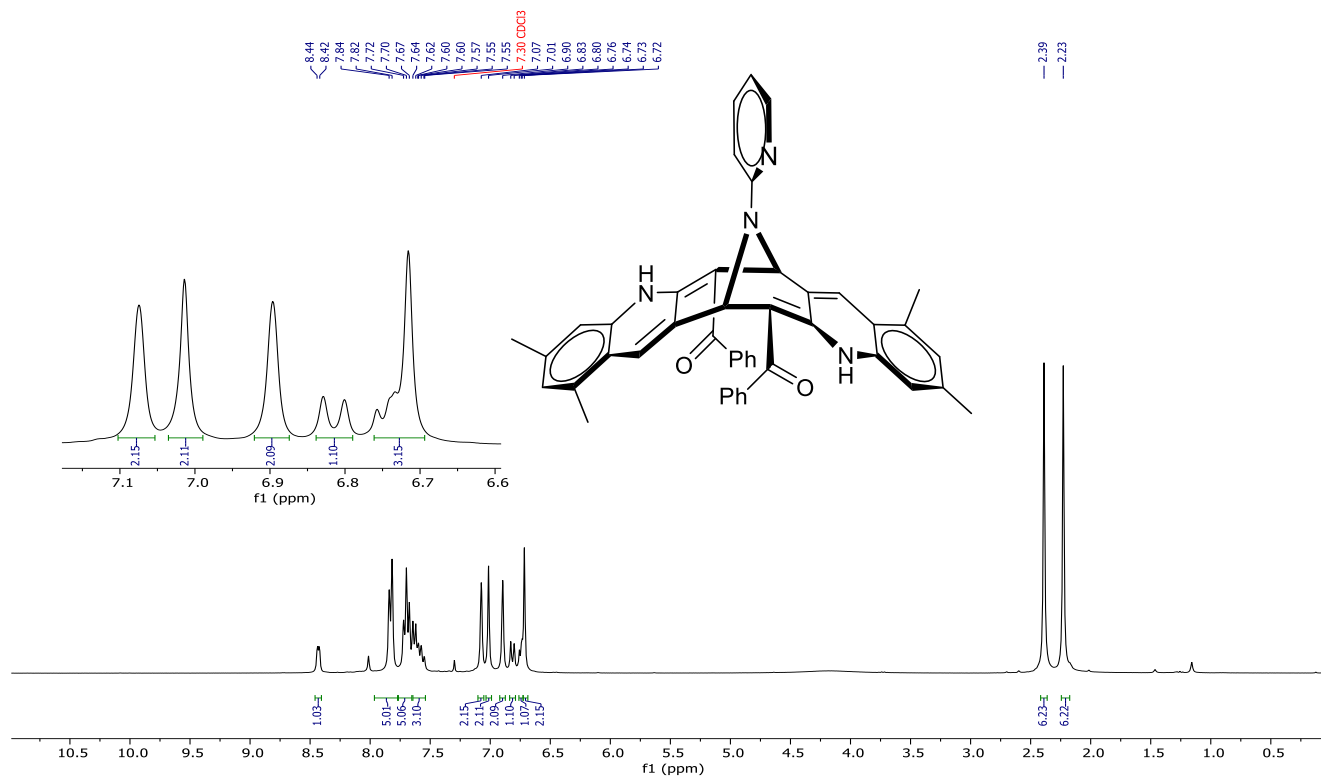

Figure S34:  $^1\text{H}$  NMR Compound 31 (300 MHz,  $\text{CDCl}_3$ )

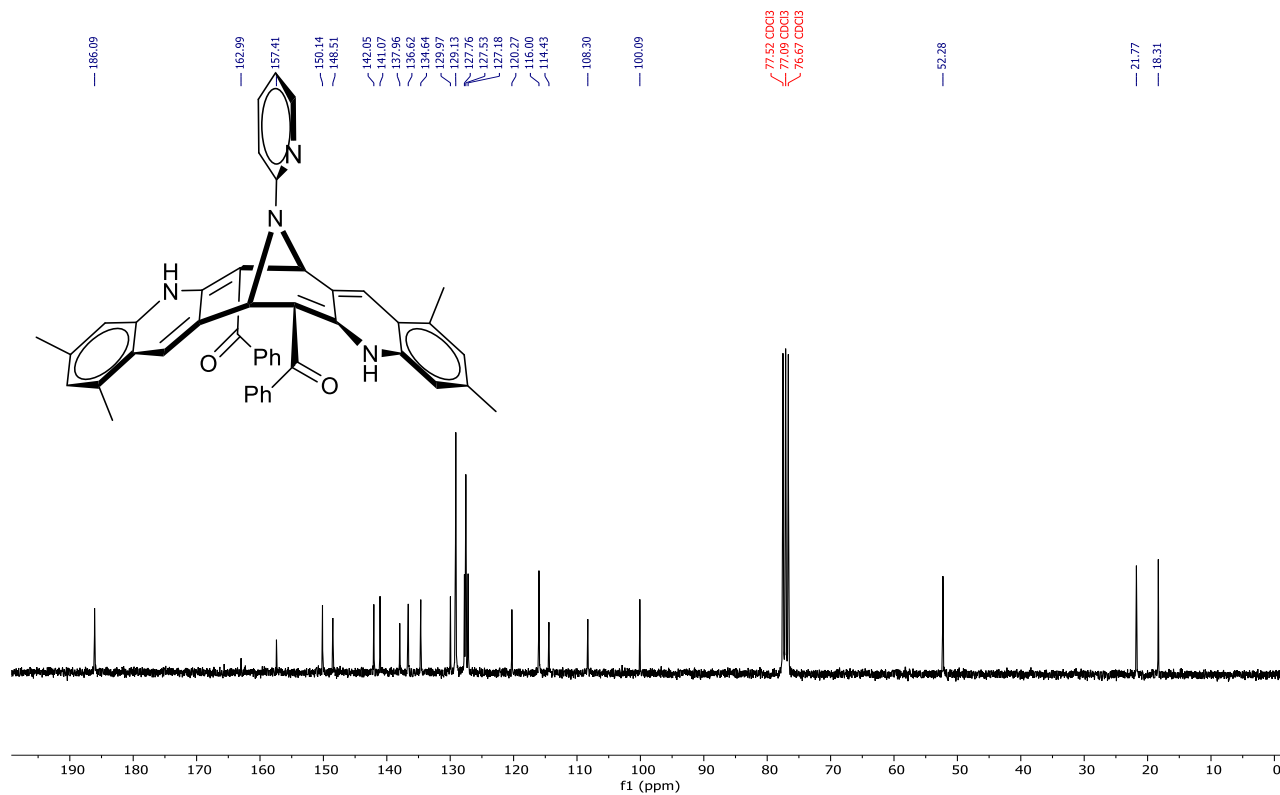

Figure S35:  $^{13}\text{C}\{^1\text{H}\}$  NMR Compound 31 (75 MHz,  $\text{CDCl}_3$ )

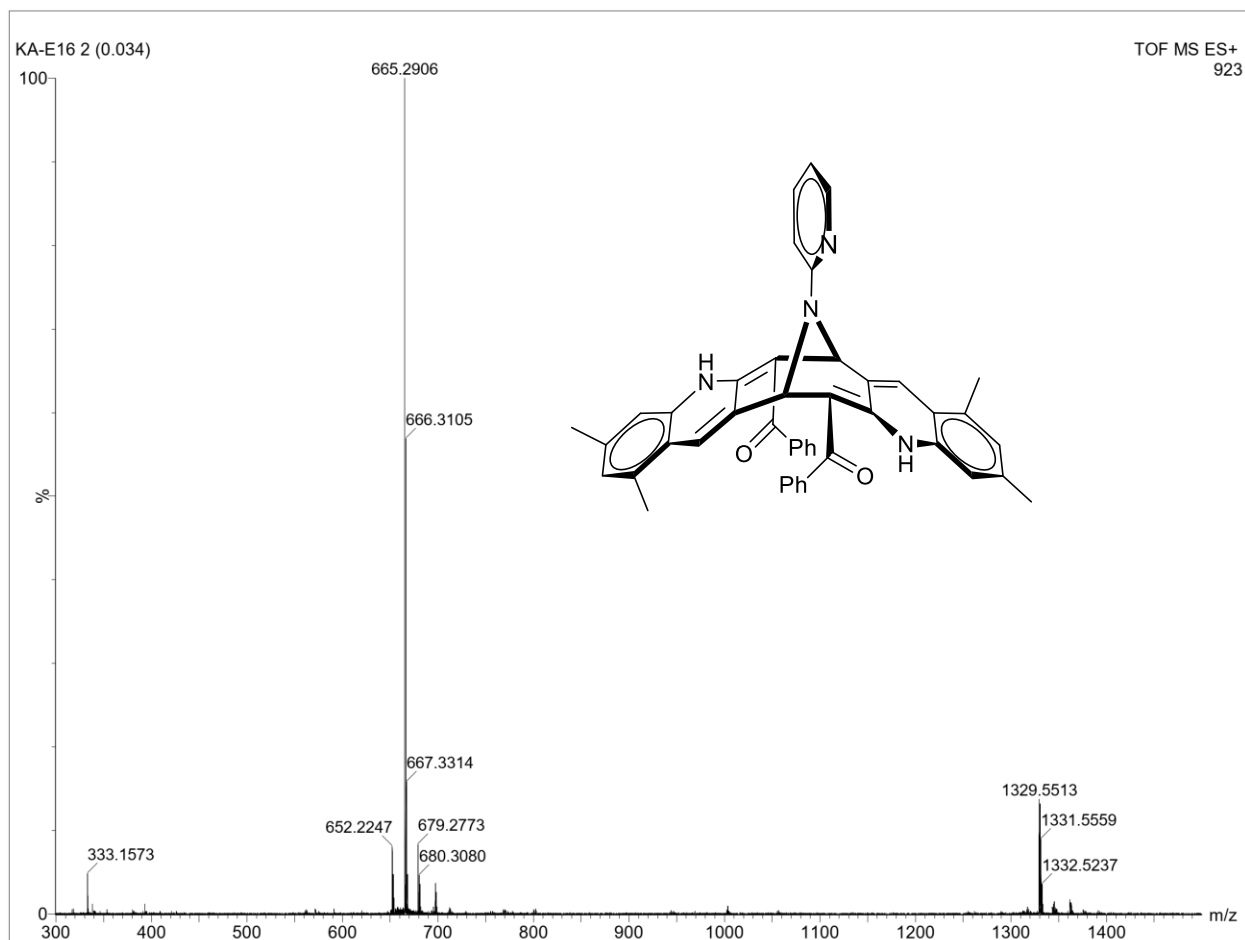Figure S36: HRMS (ESI) of **31**



Supporting Information

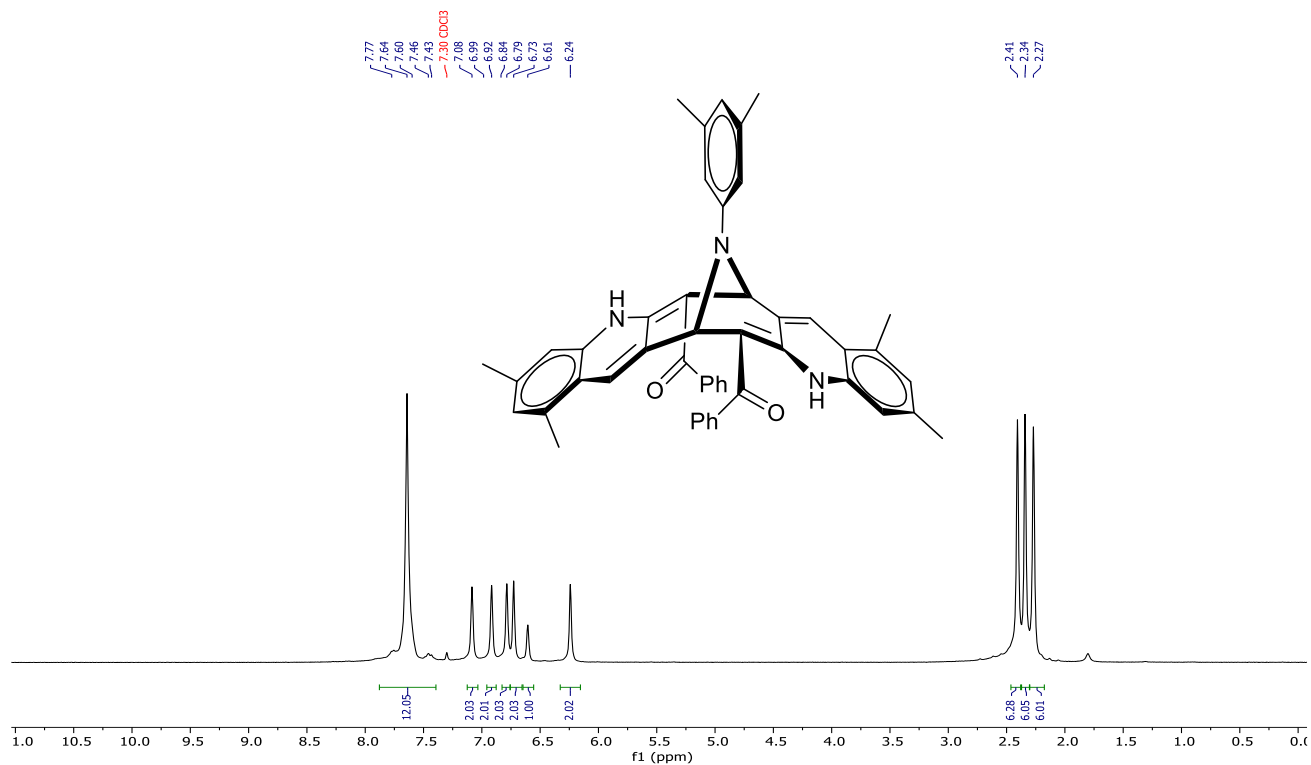

Figure S37:  $^1\text{H}$  NMR Compound **3m** (300 MHz,  $\text{CDCl}_3$ )

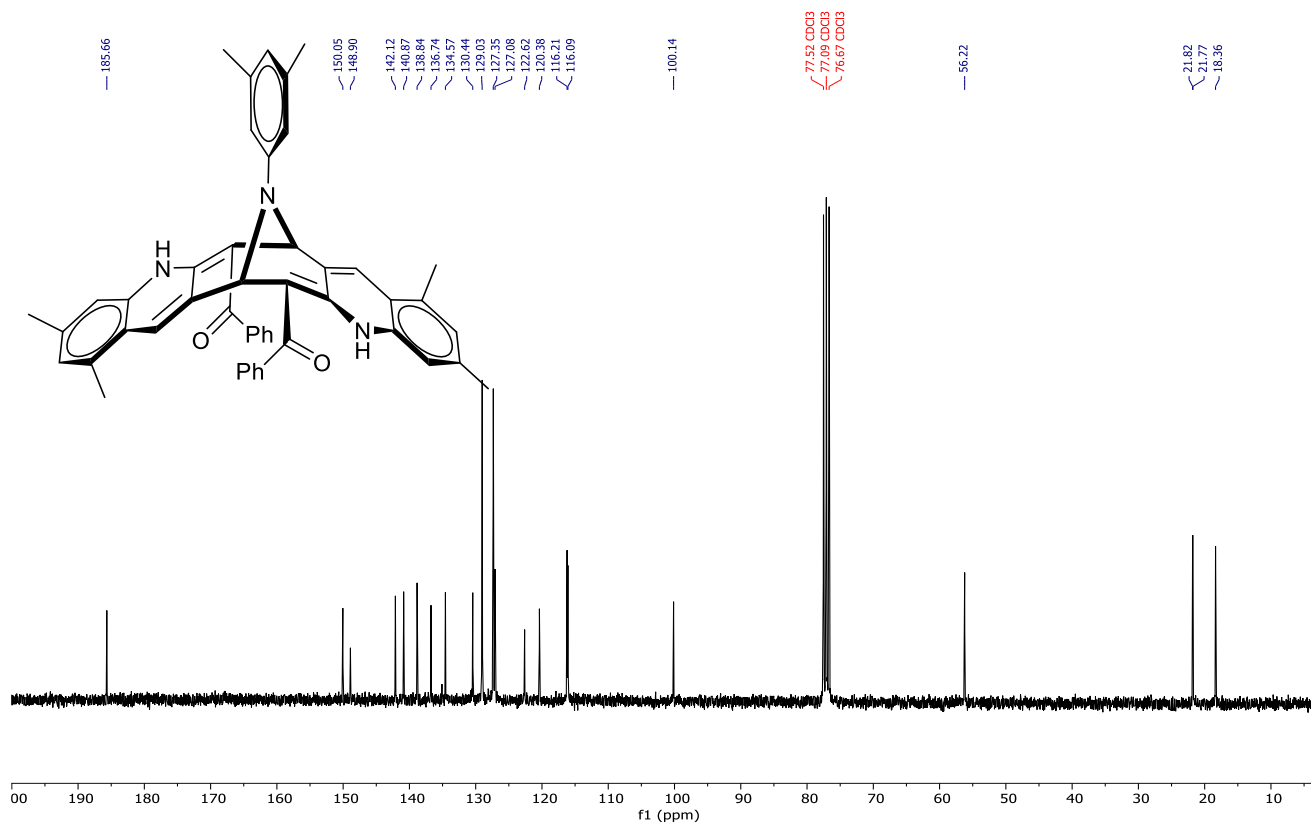

Figure S38:  $^{13}\text{C}\{^1\text{H}\}$  NMR Compound **3m** (75 MHz,  $\text{CDCl}_3$ )

## Supporting Information

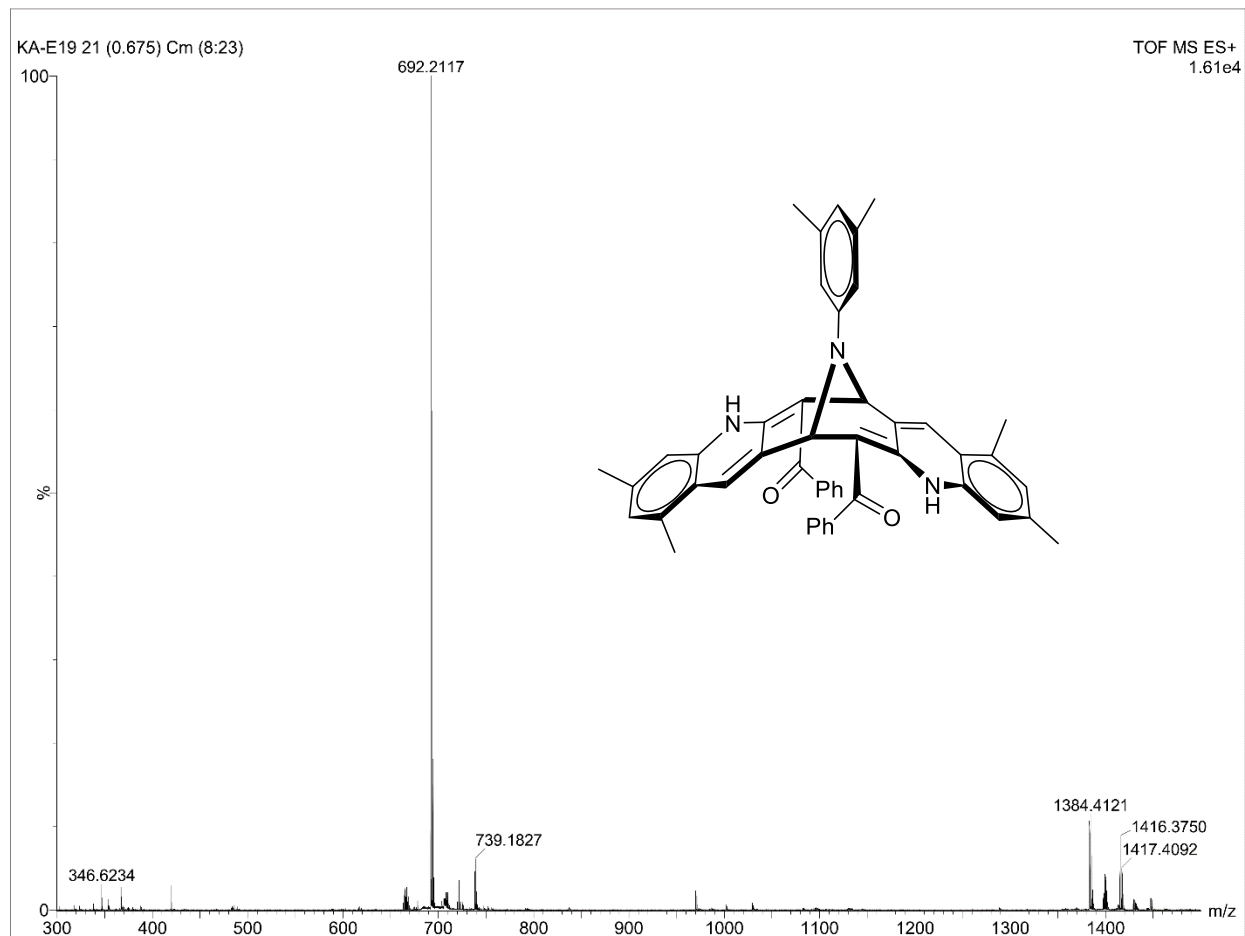

Figure S39 : HRMS (ESI) of **3m**

Supporting Information

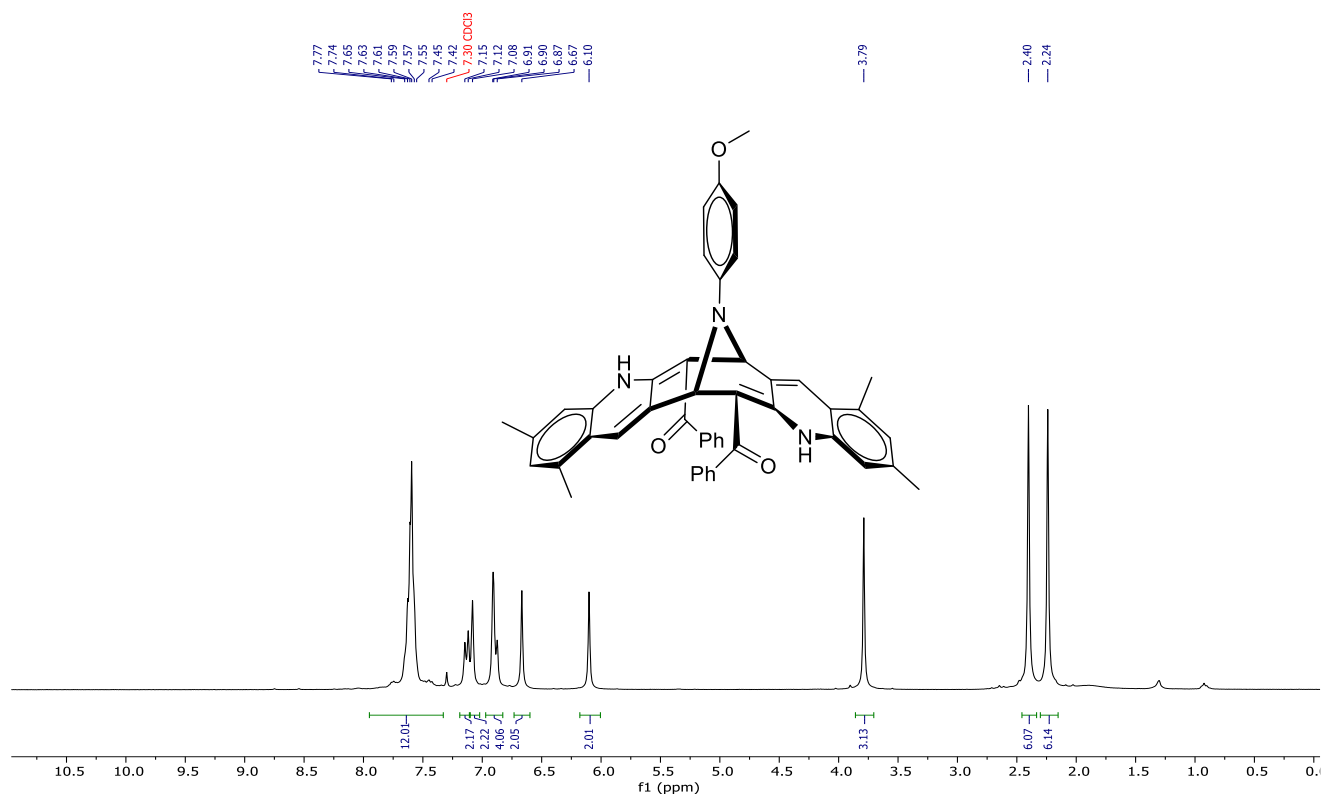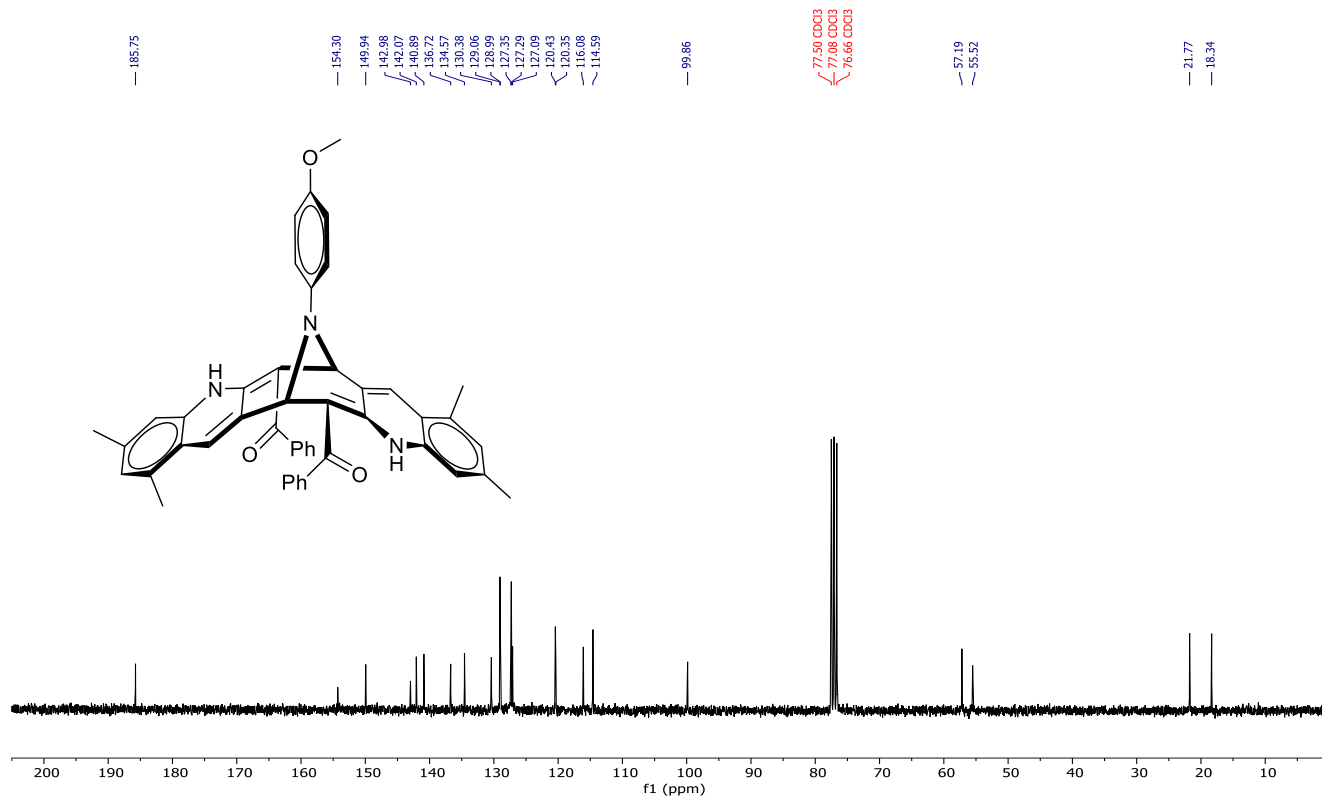

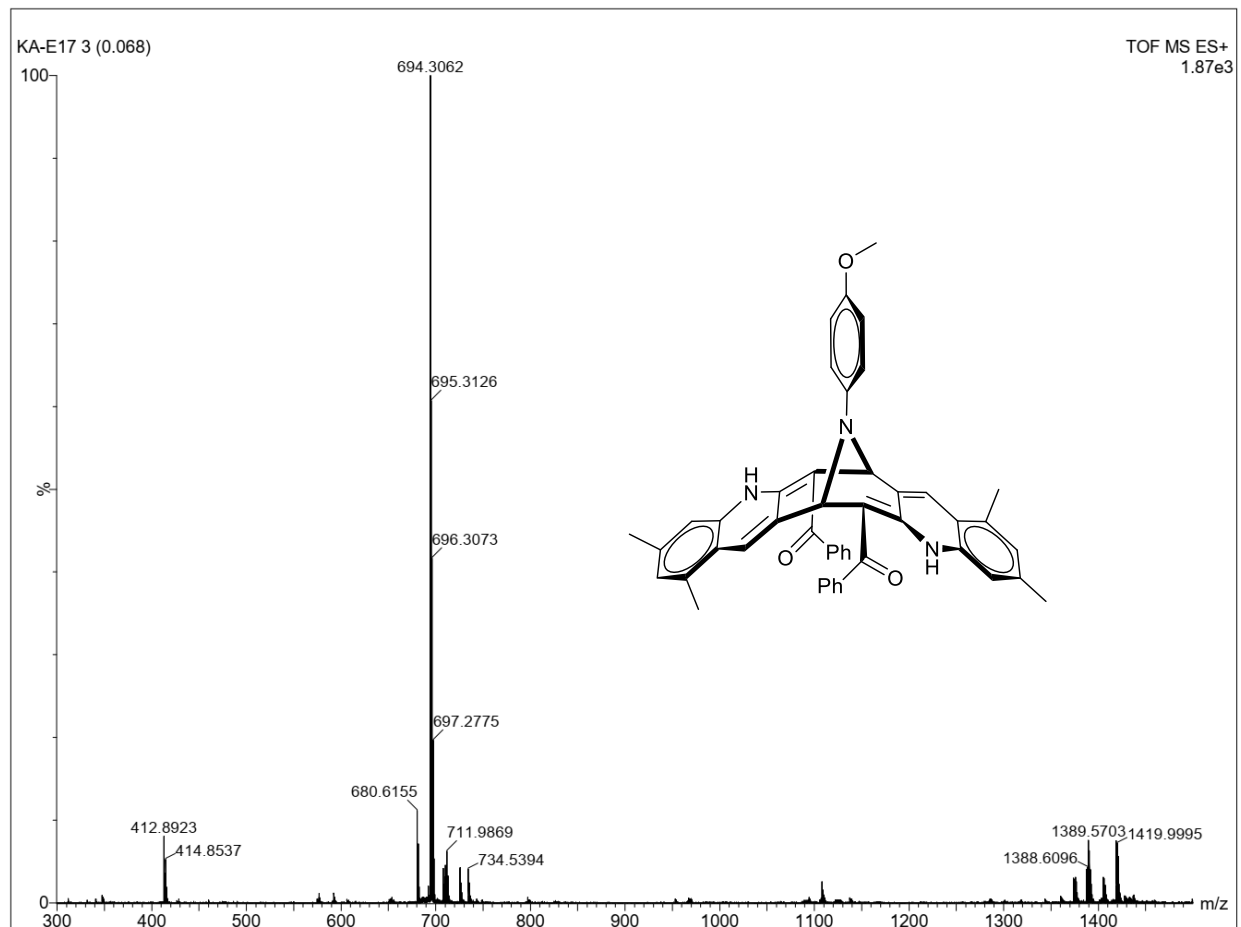Figure S42: HRMS (ESI) of **3n**

Supporting Information

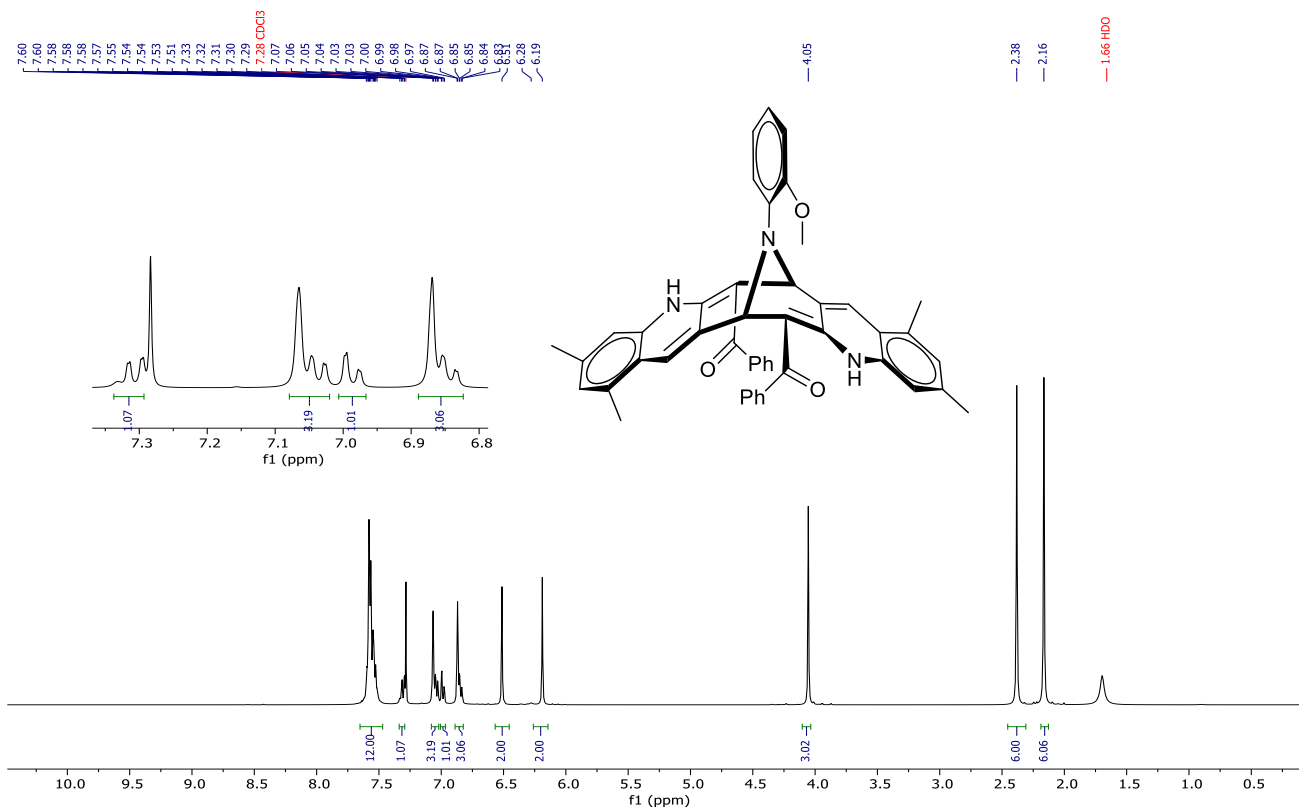

Figure S43:  $^1\text{H}$  NMR Compound **3o** (400 MHz,  $\text{CDCl}_3$ )

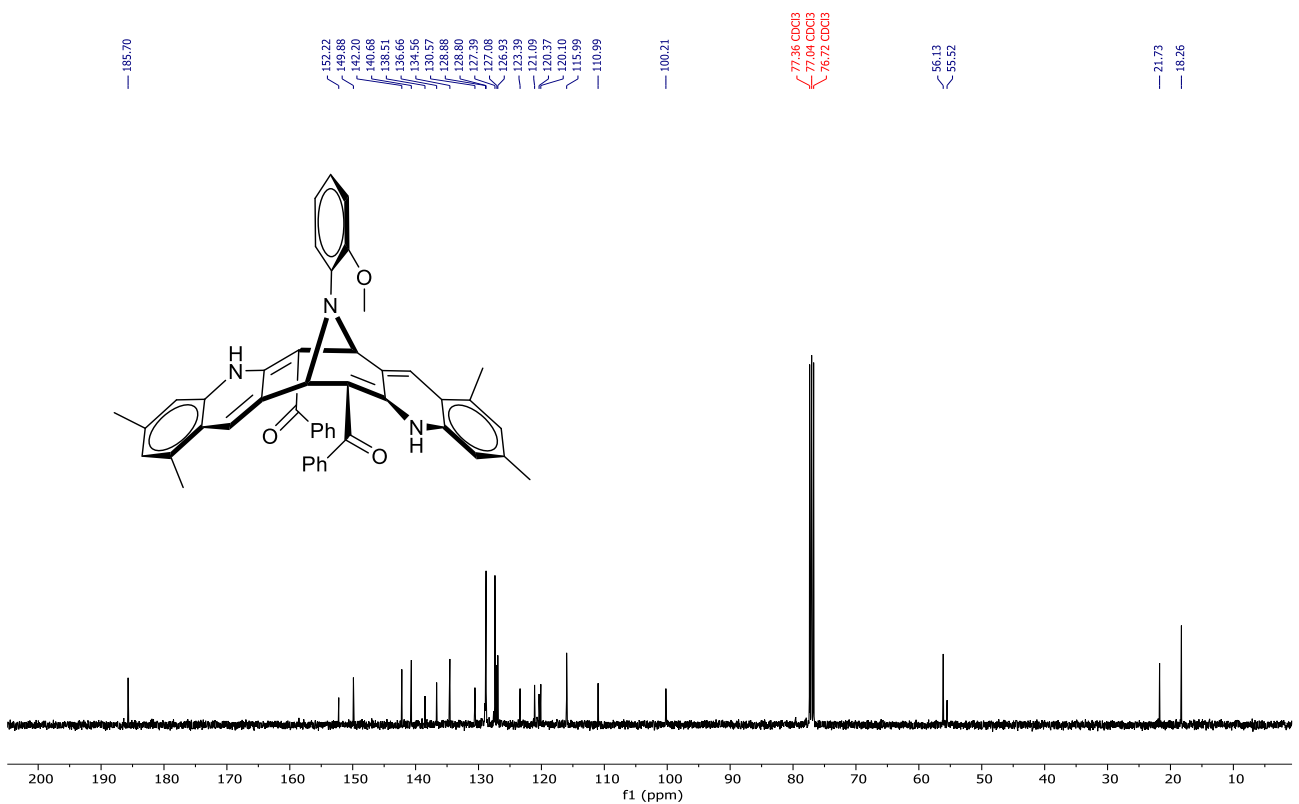

Figure S44:  $^{13}\text{C}\{^1\text{H}\}$  NMR Compound **3o** (101 MHz,  $\text{CDCl}_3$ )

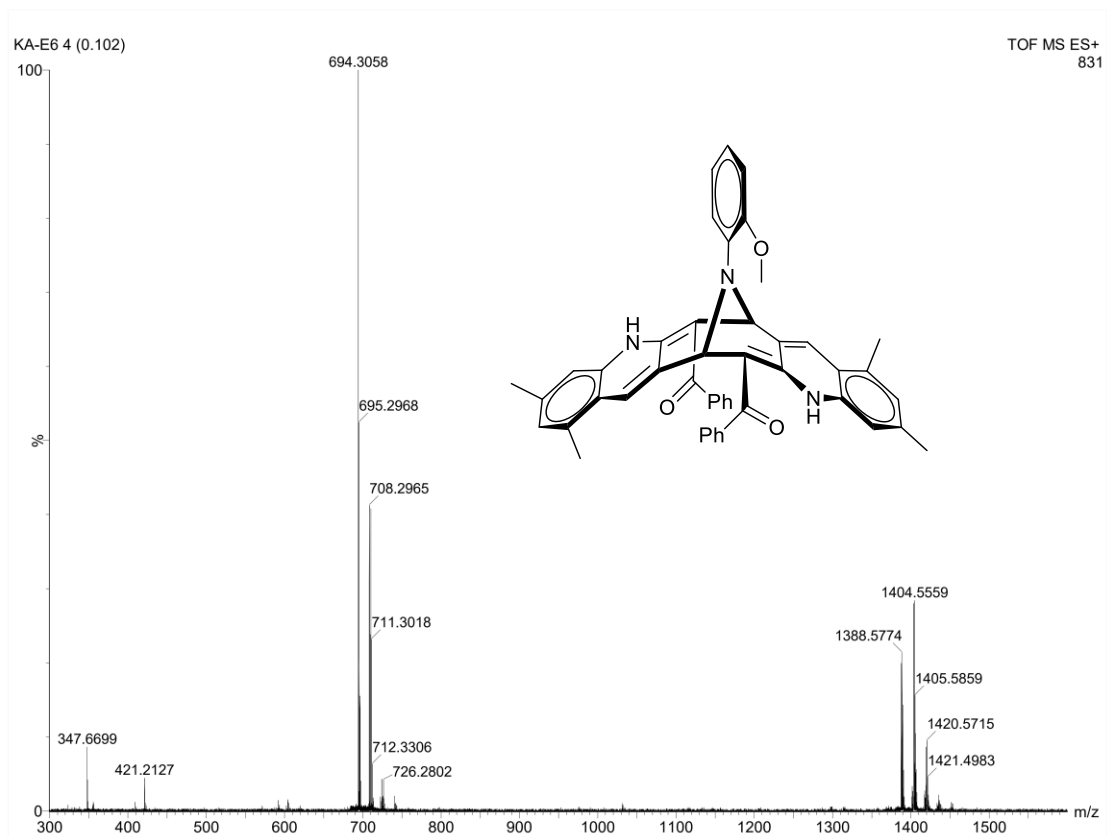Figure S45: HRMS (ESI) of **3o**

Supporting Information

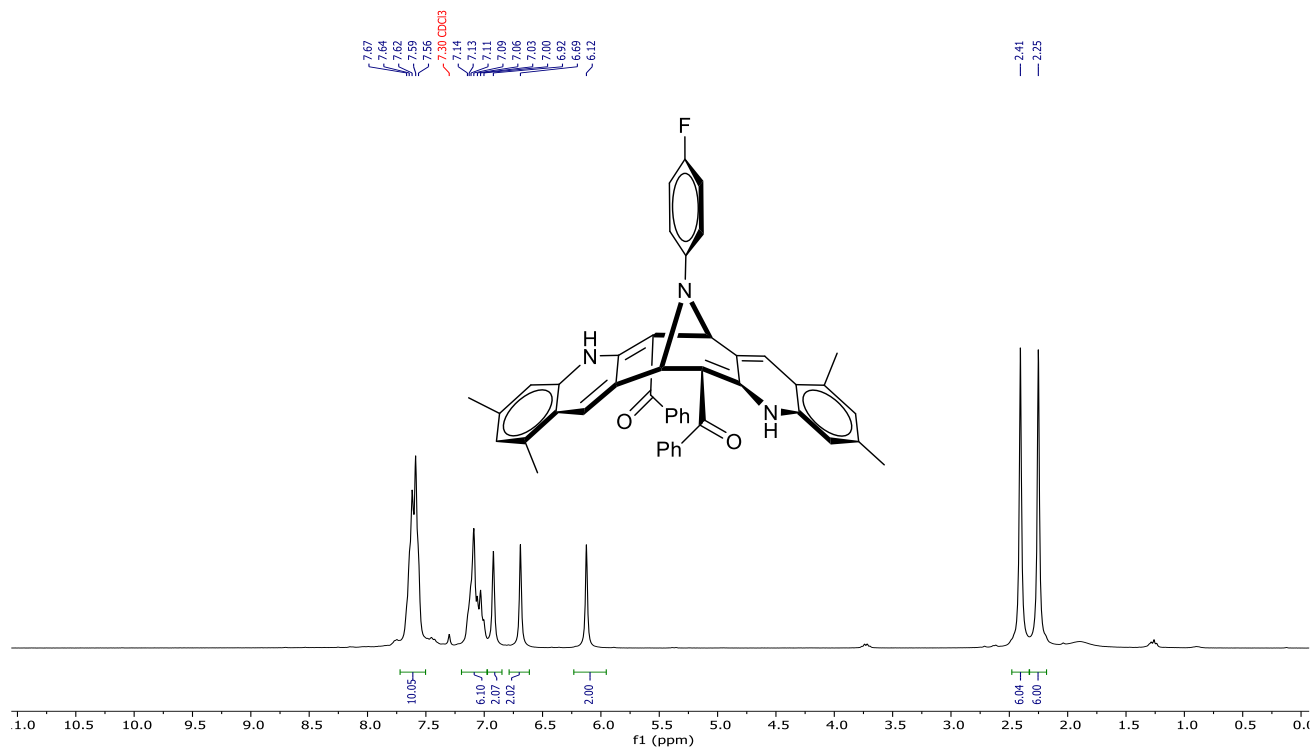

Figure S46: <sup>1</sup>H NMR Compound 3p (300 MHz, CDCl<sub>3</sub>)

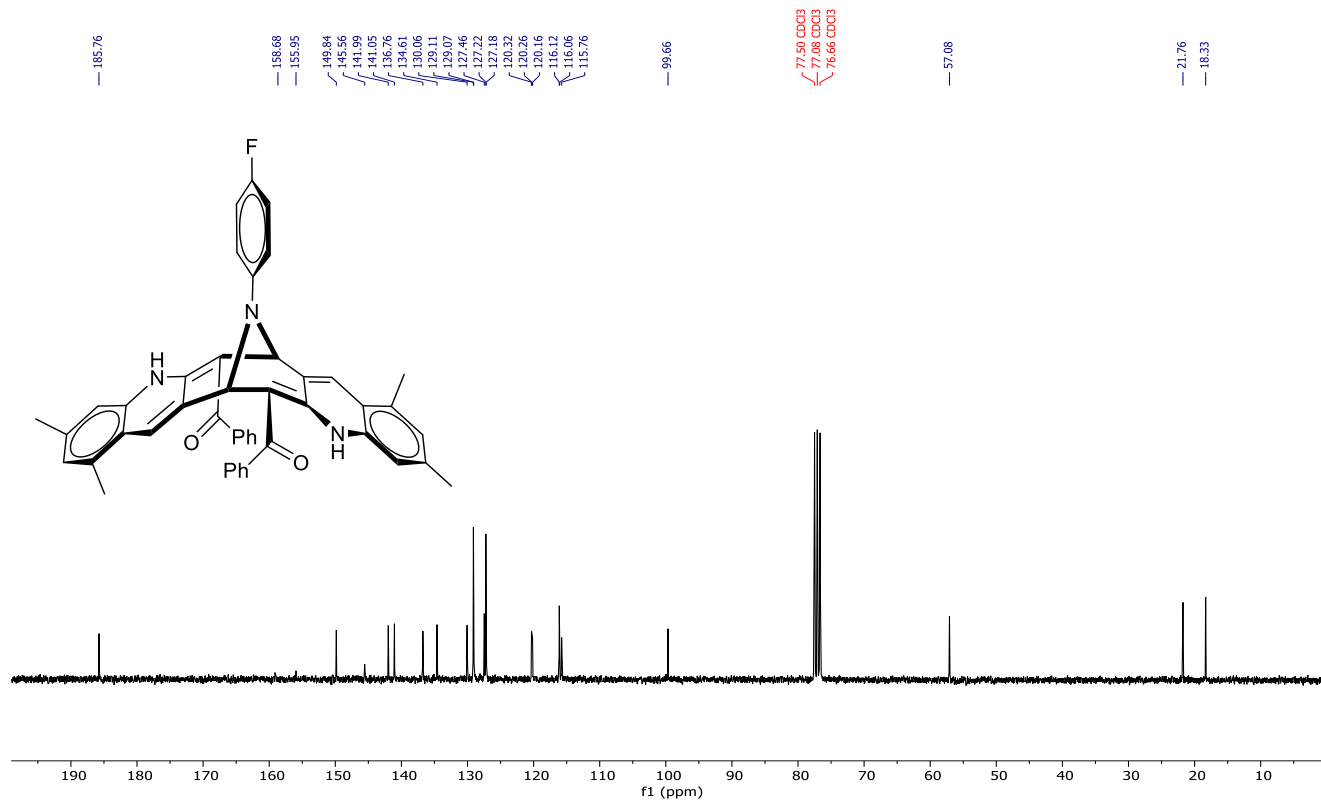

Figure S47: <sup>13</sup>C {<sup>1</sup>H} NMR Compound 3p (75 MHz, CDCl<sub>3</sub>)

## Supporting Information

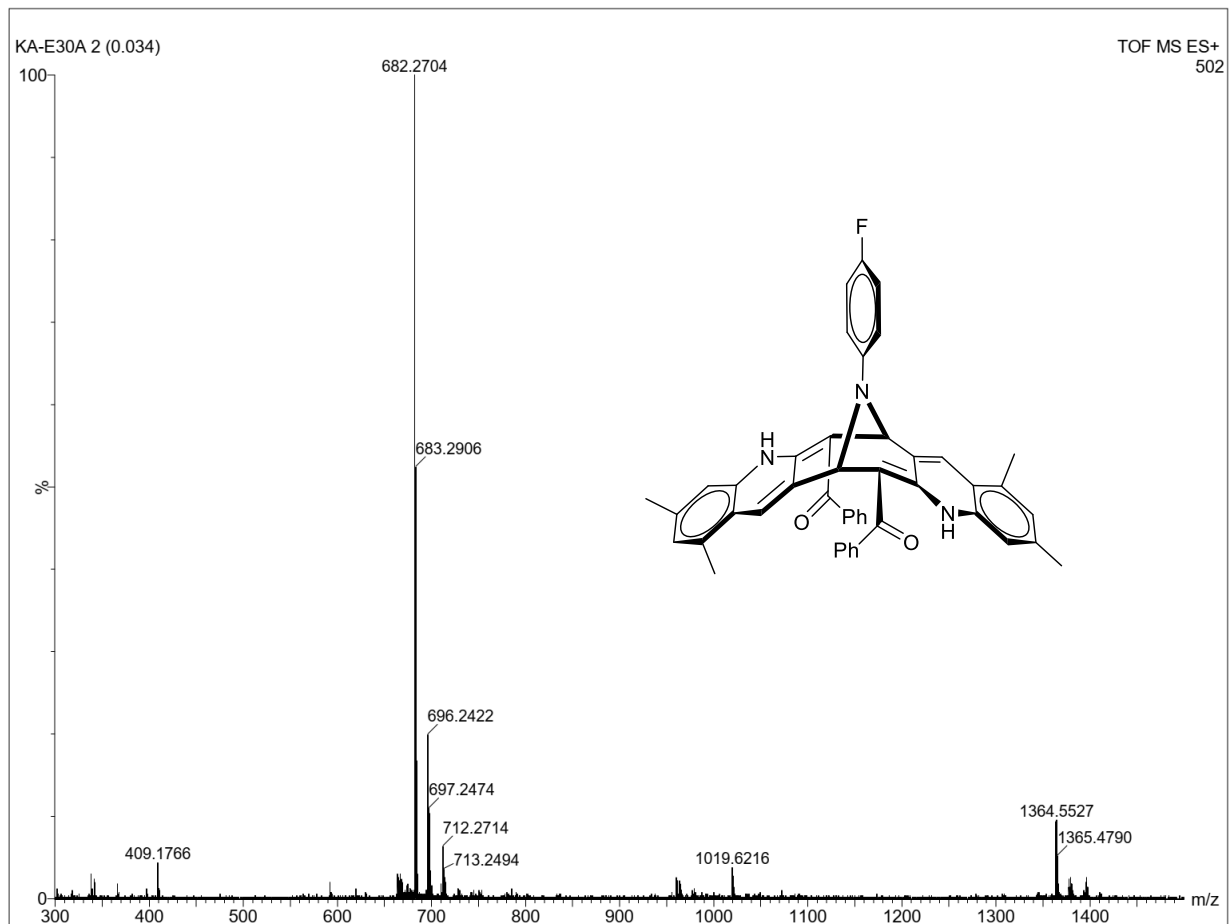

Figure S48: HRMS (ESI) of **3p**



Supporting Information

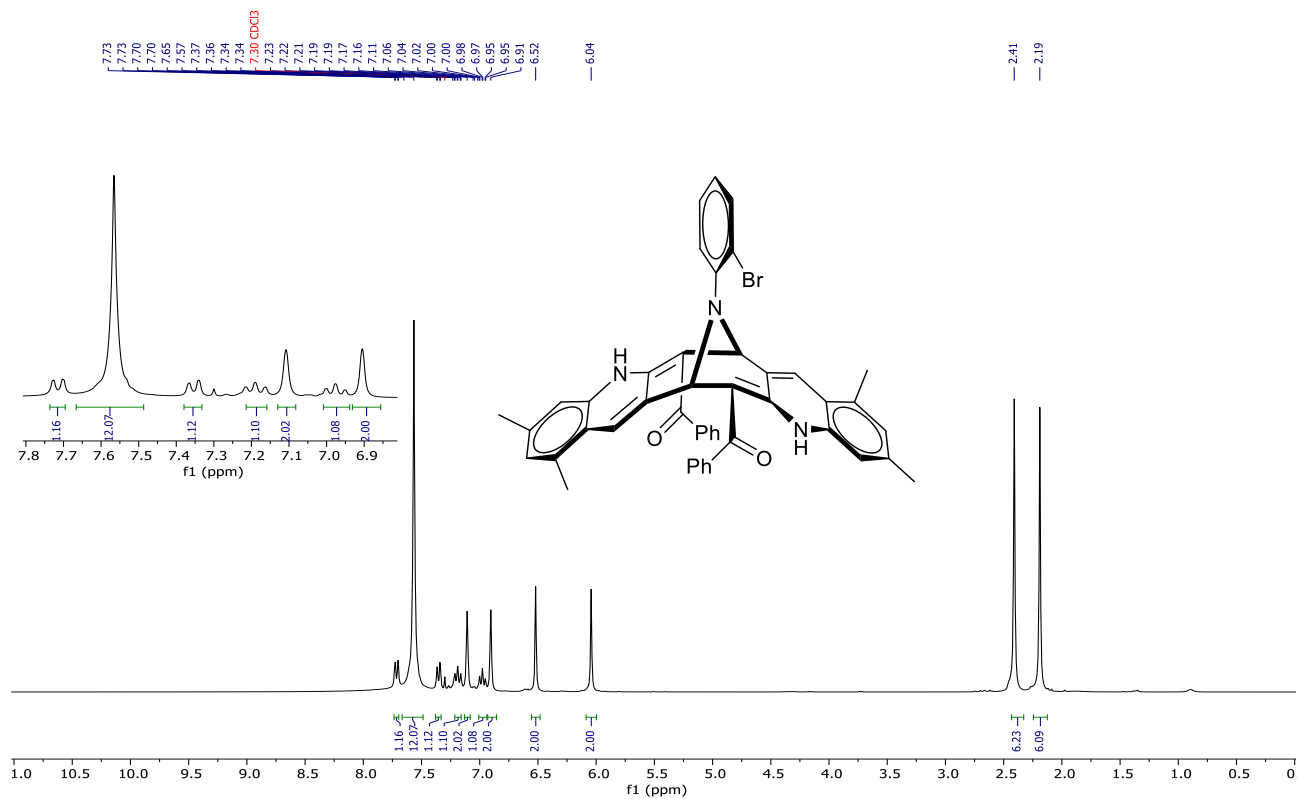

Figure S49:  $^1\text{H}$  NMR Compound **3q** (300 MHz,  $\text{CDCl}_3$ )

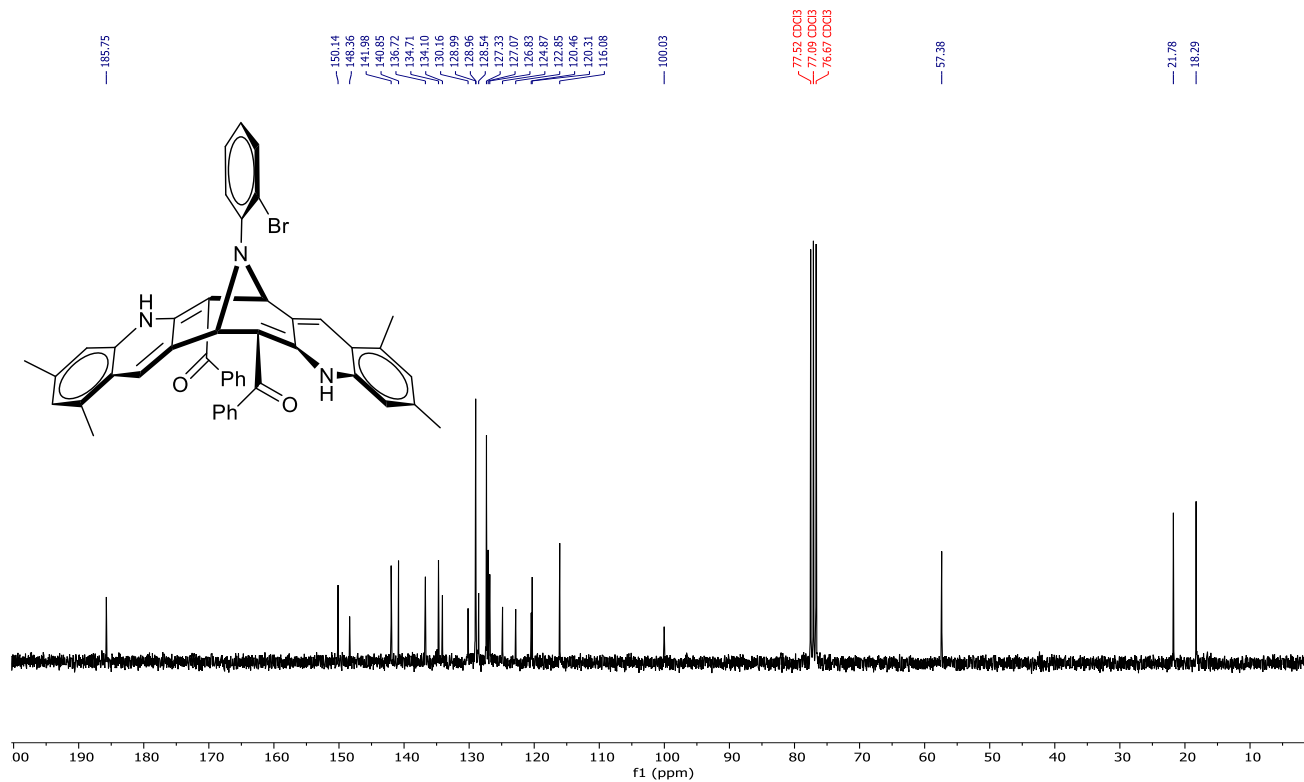

Figure S50:  $^{13}\text{C}\{^1\text{H}\}$  NMR Compound **3q** (75 MHz,  $\text{CDCl}_3$ )

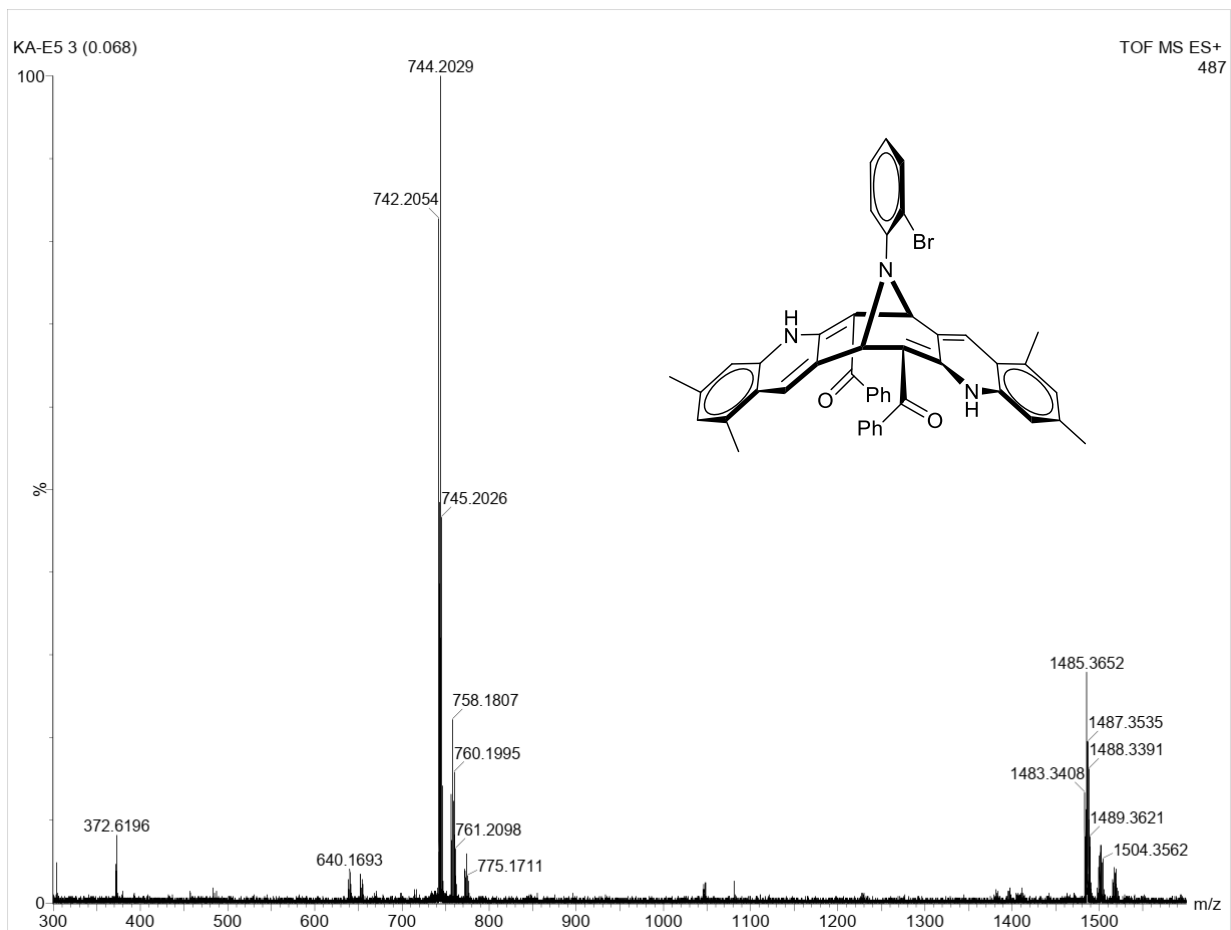Figure S51: HRMS (ESI) of **3q**

Supporting Information

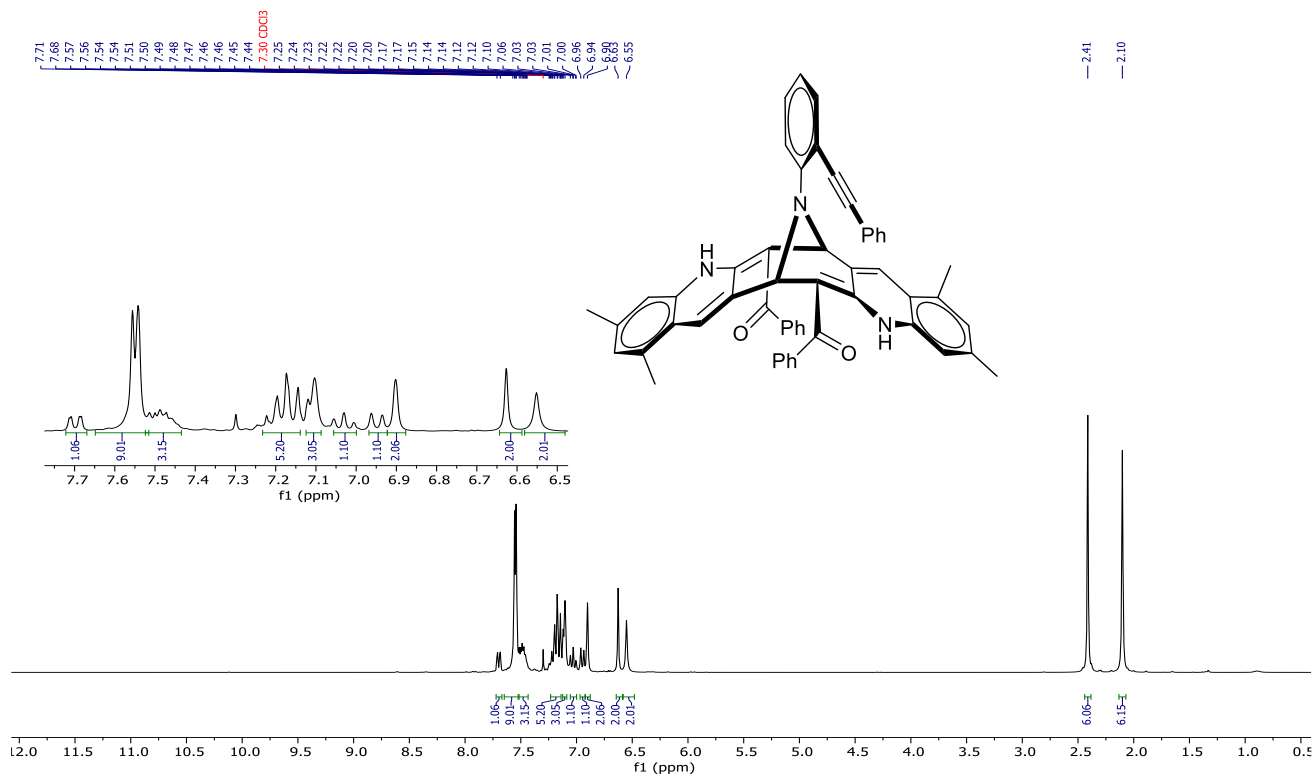

Figure S52: <sup>1</sup>H NMR Compound 3r (300 MHz, CDCl<sub>3</sub>)

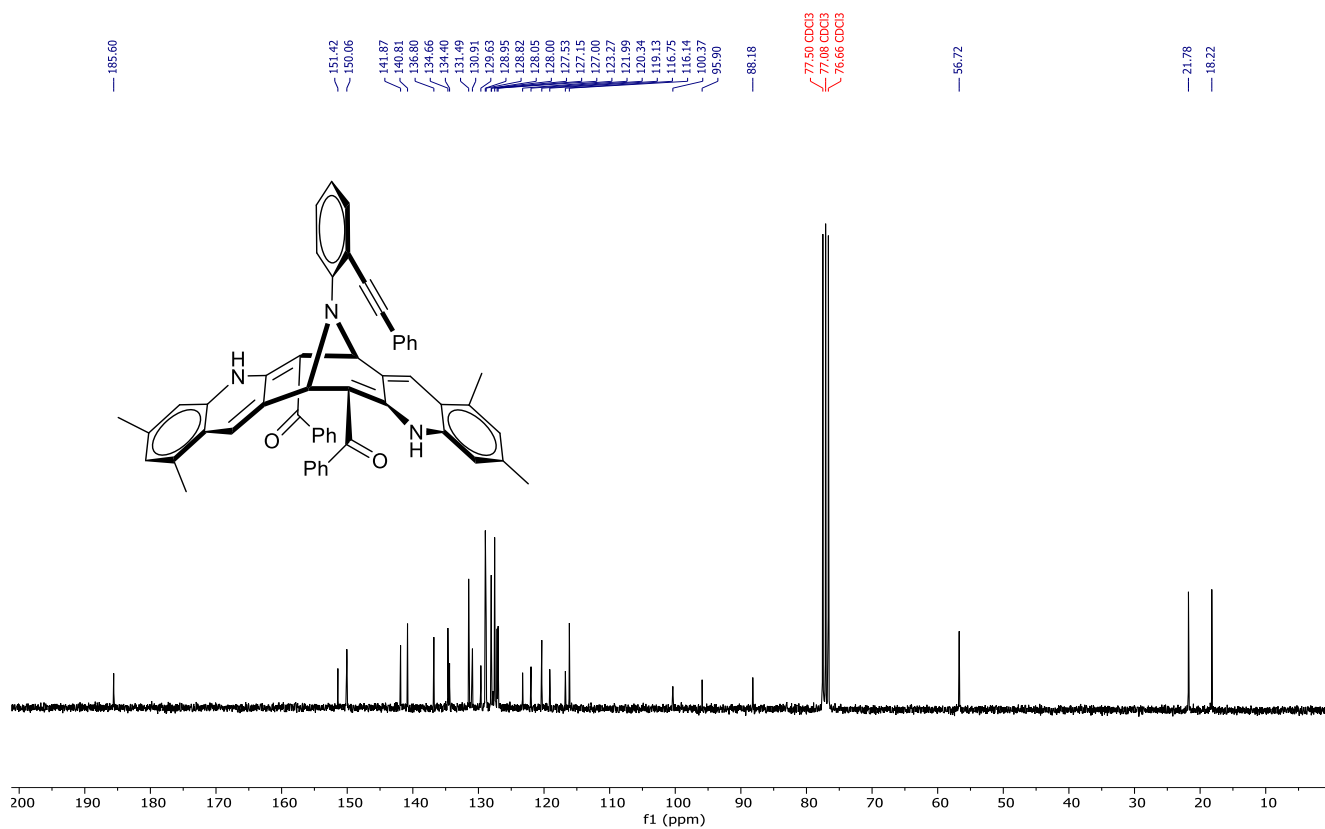

Figure S53: <sup>13</sup>C{<sup>1</sup>H}NMR Compound 3r (75 MHz, CDCl<sub>3</sub>)

## Supporting Information

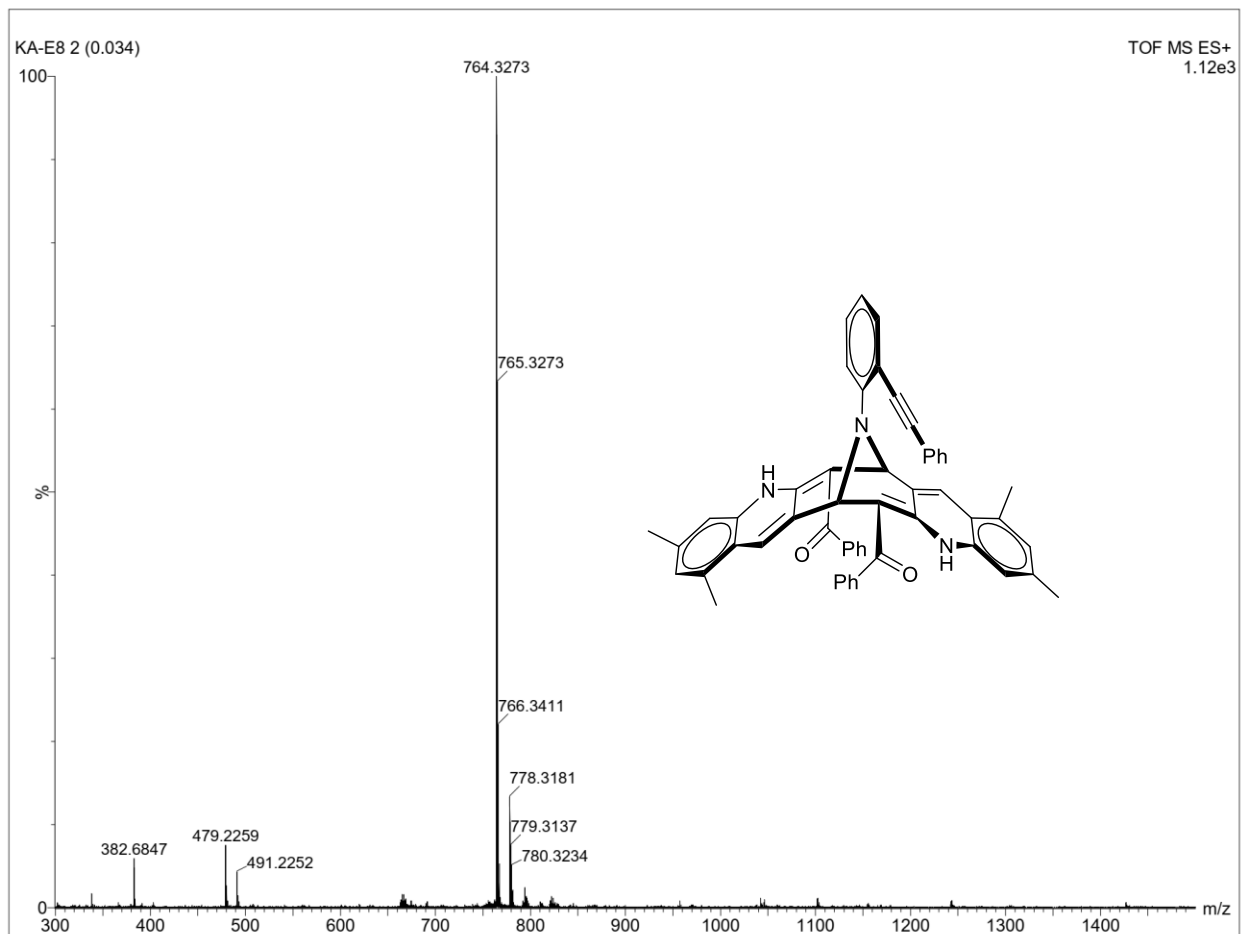

Figure S54: HRMS (ESI) of **3r**

Supporting Information

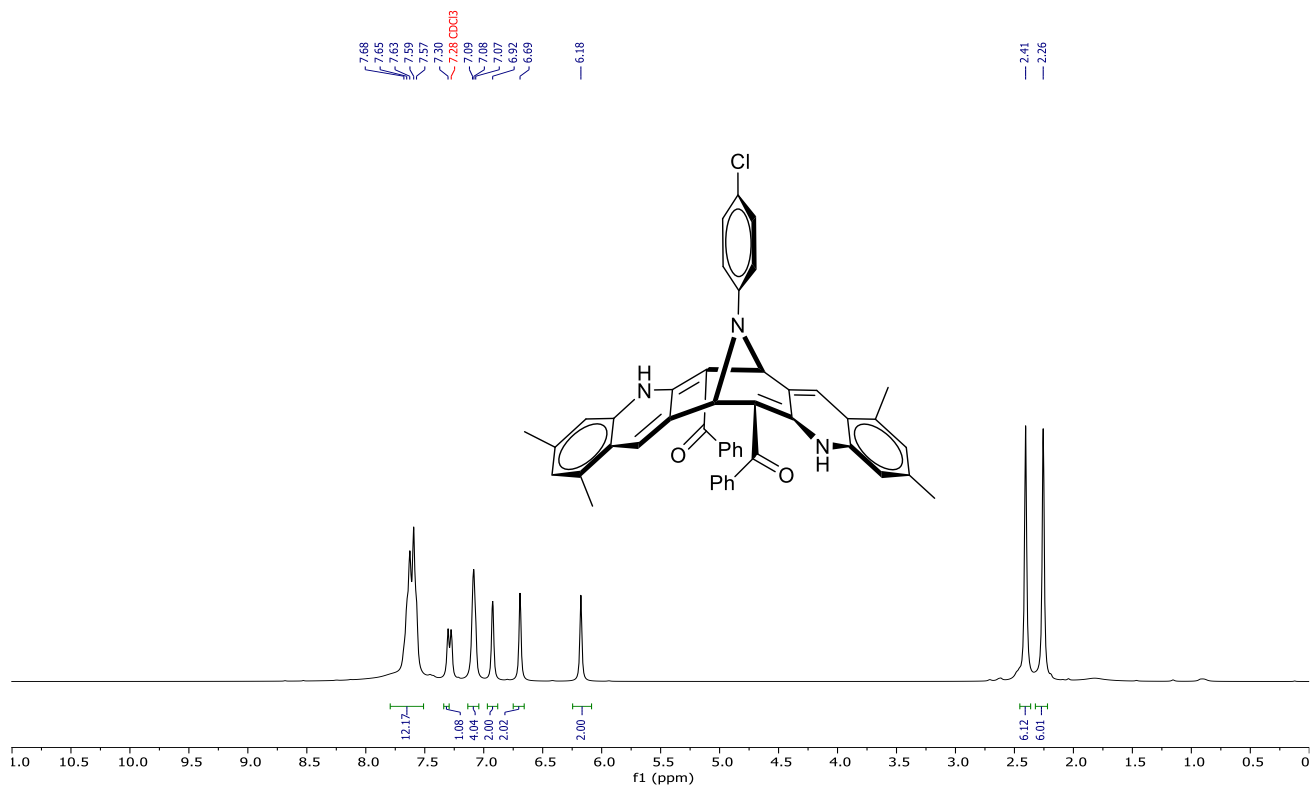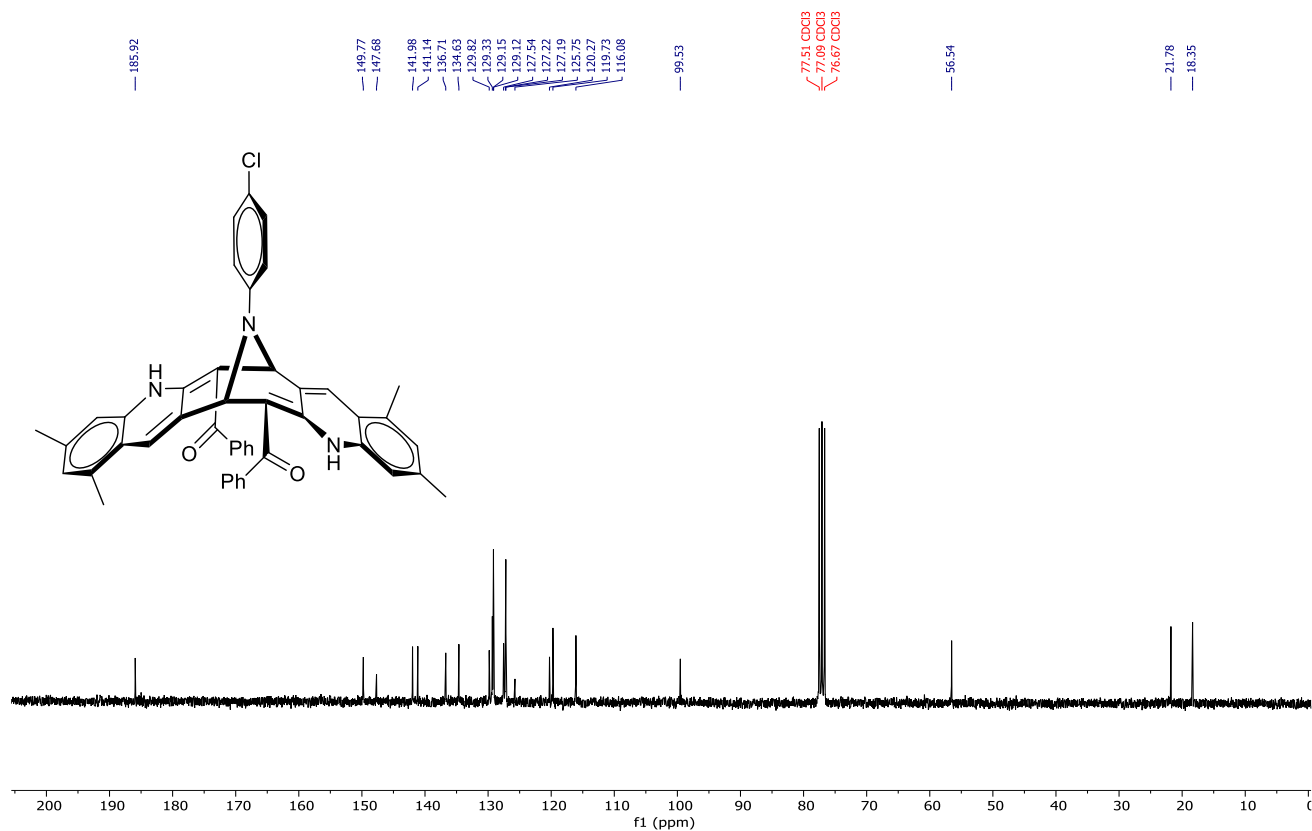

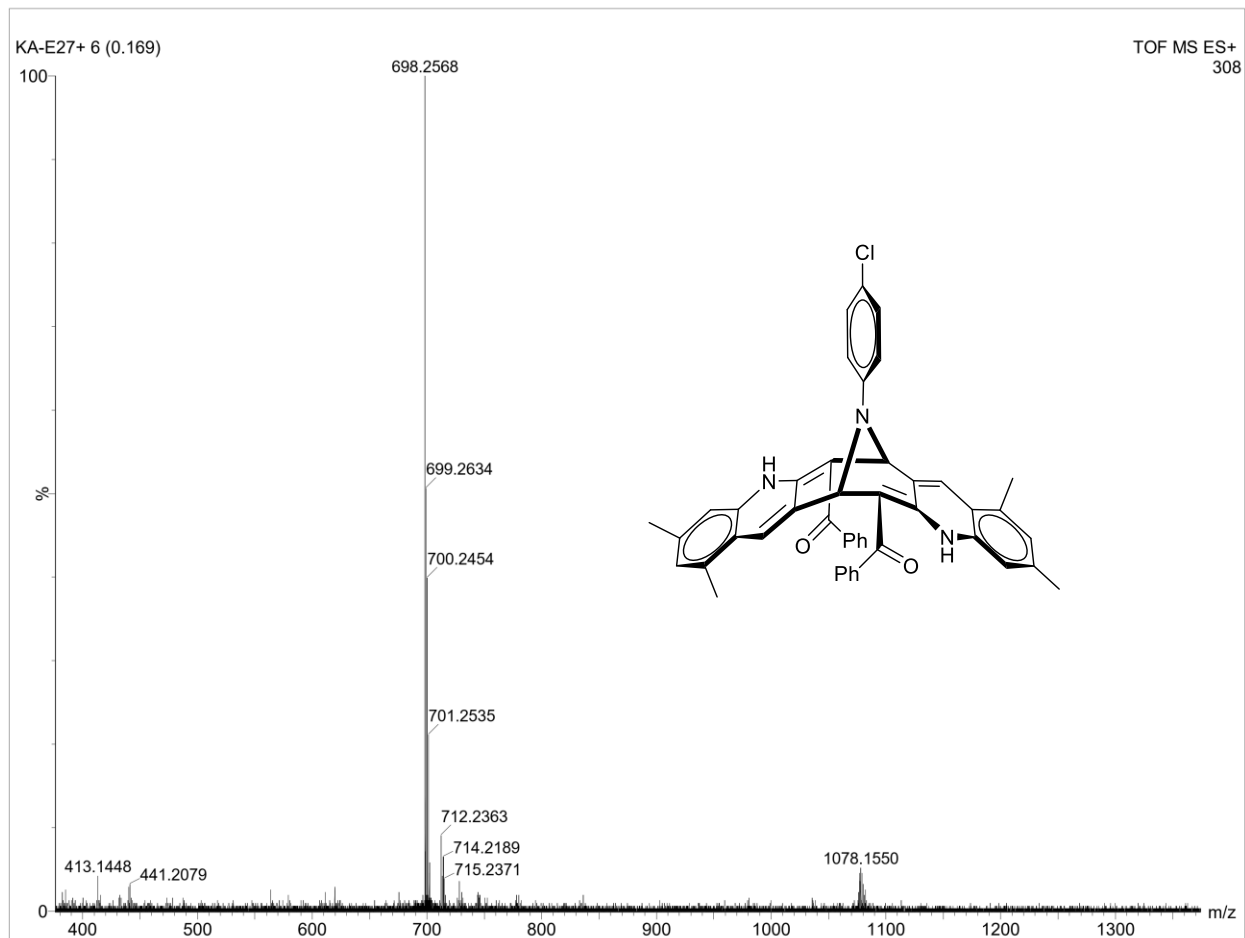Figure S57: HRMS (ESI) of **3s**

Supporting Information

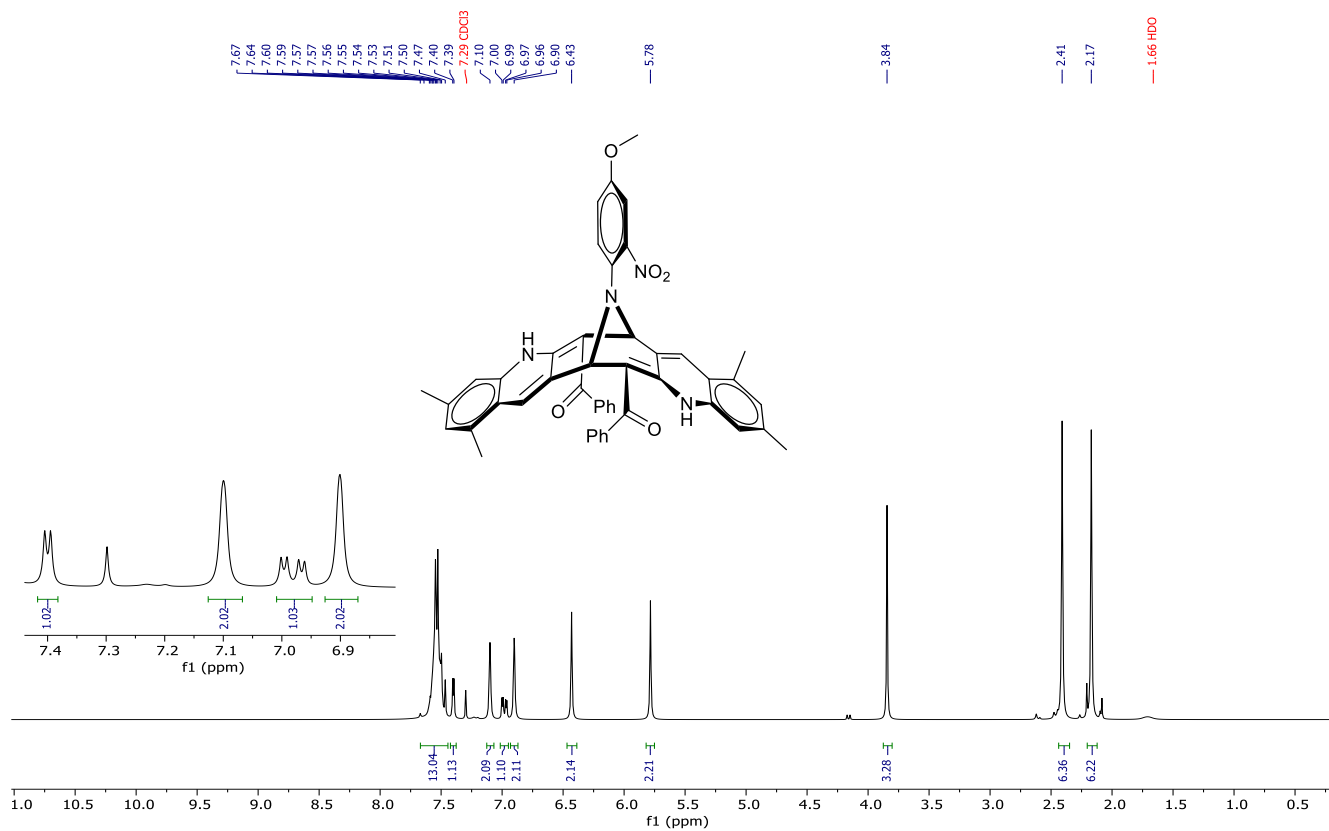

Figure S58: <sup>1</sup>H NMR Compound 3t (300 MHz, CDCl<sub>3</sub>)

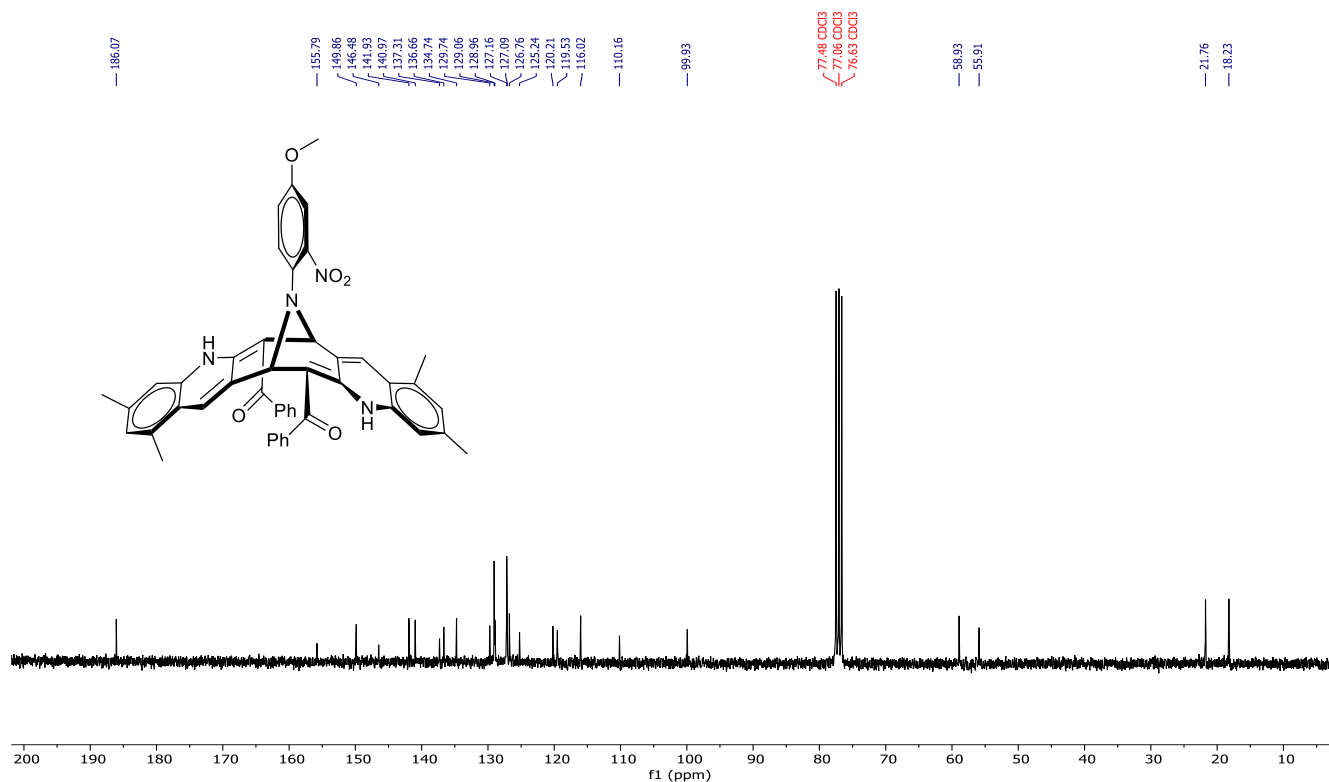

Figure S59: <sup>13</sup>C{<sup>1</sup>H}NMR Compound 3t (75 MHz, CDCl<sub>3</sub>)

## Supporting Information

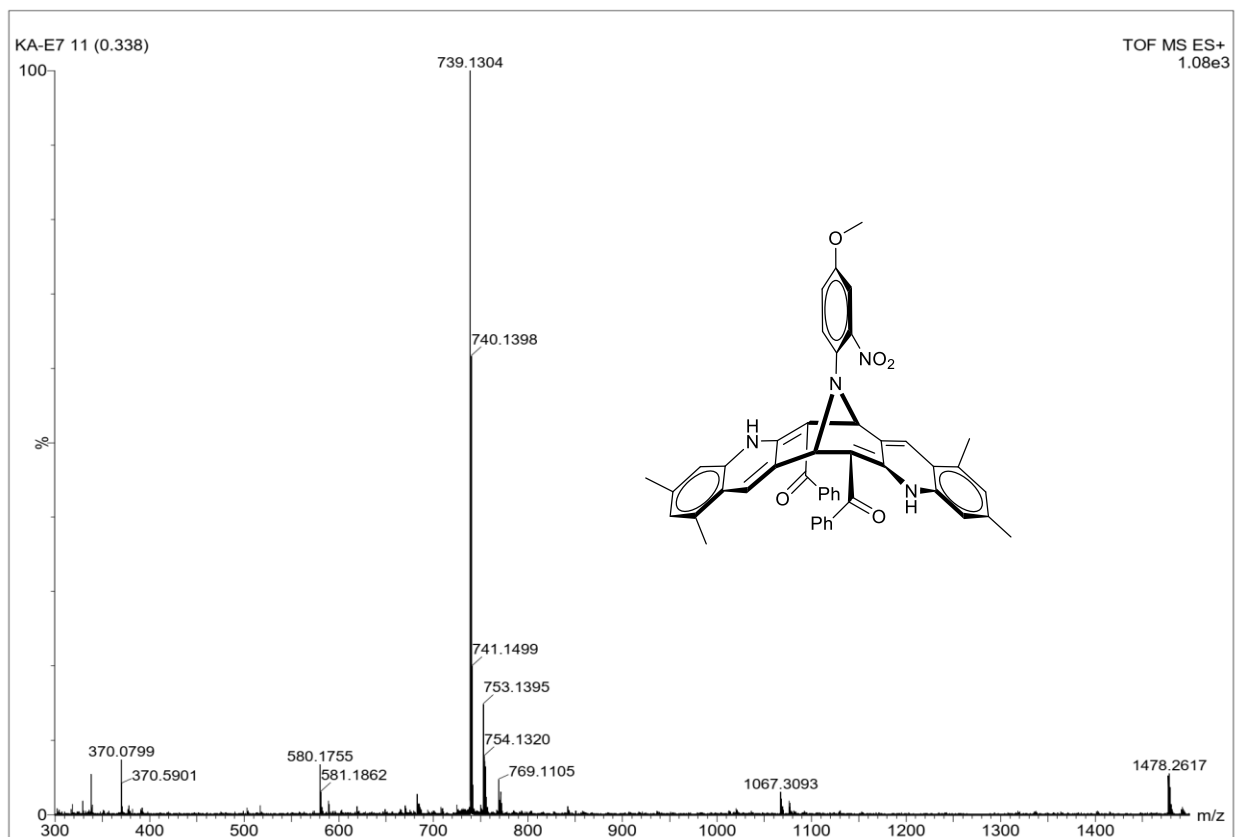

Figure S60: HRMS (ESI) of **3t**



Supporting Information

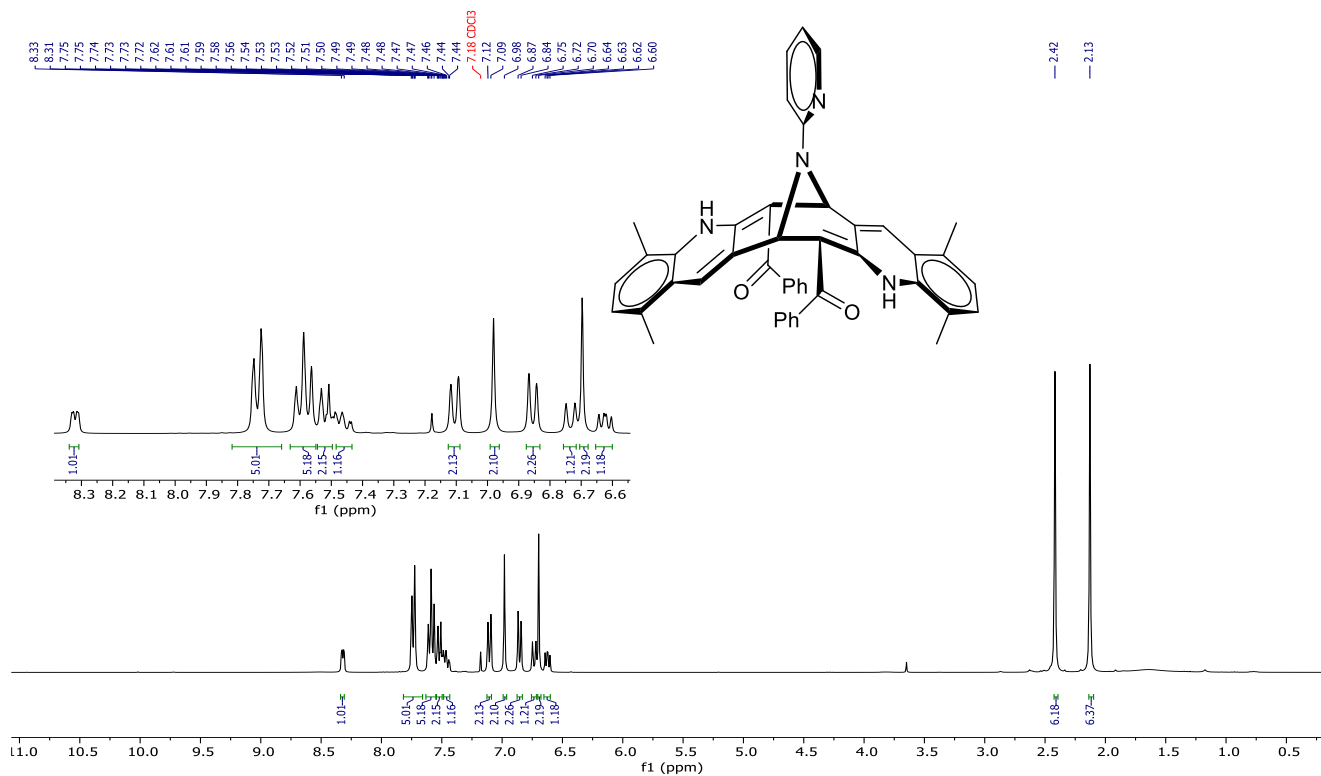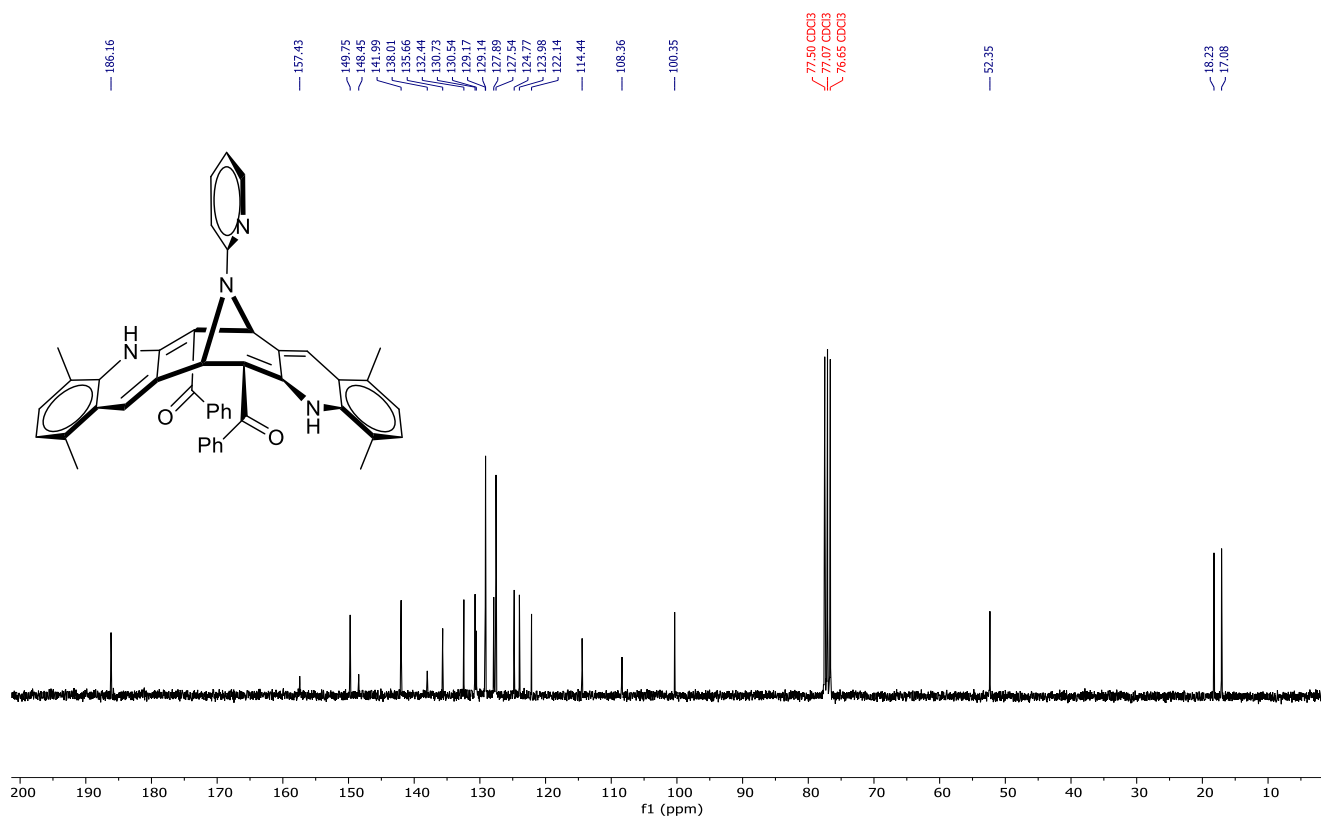

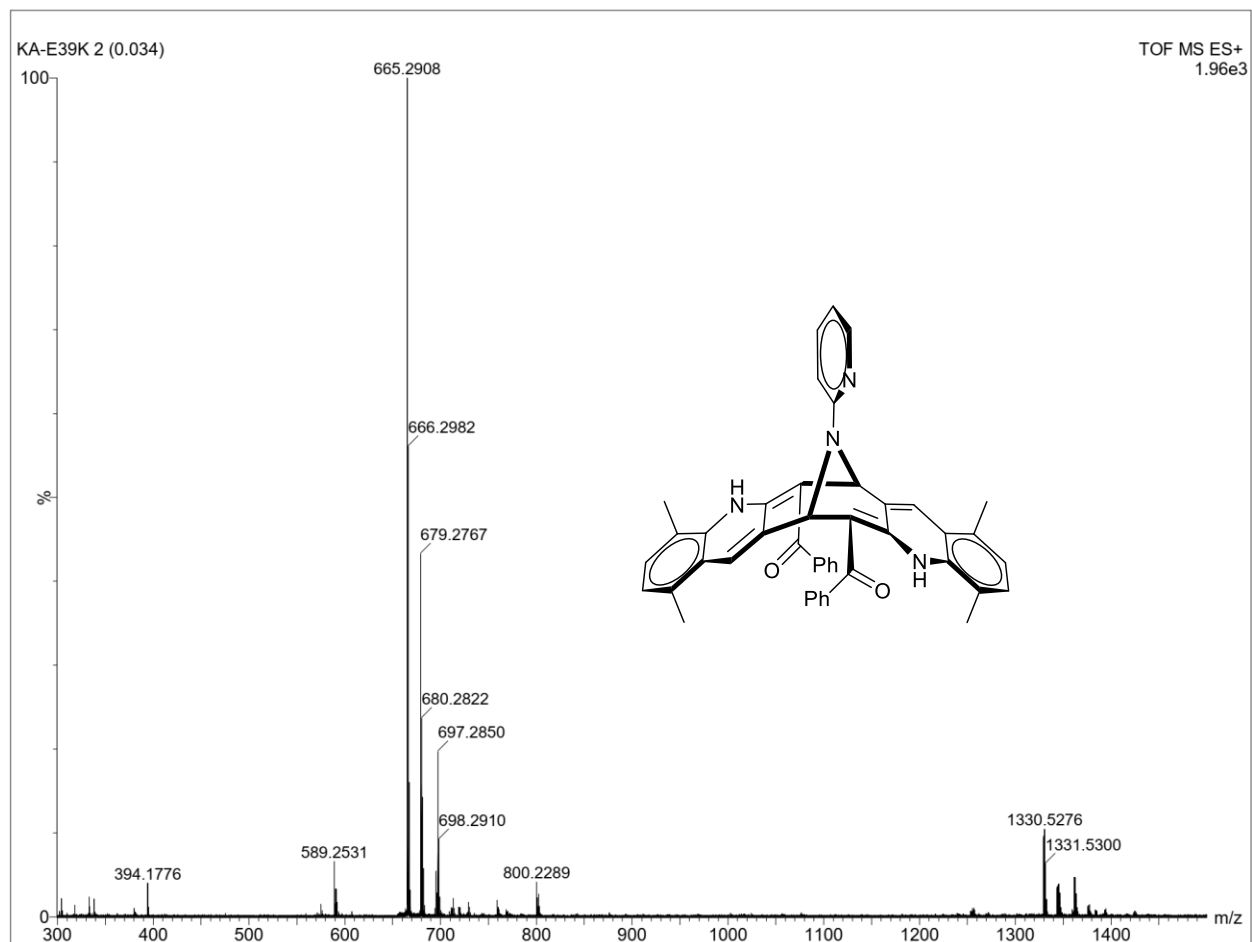Figure S63: HRMS (ESI) of **3u**

Supporting Information

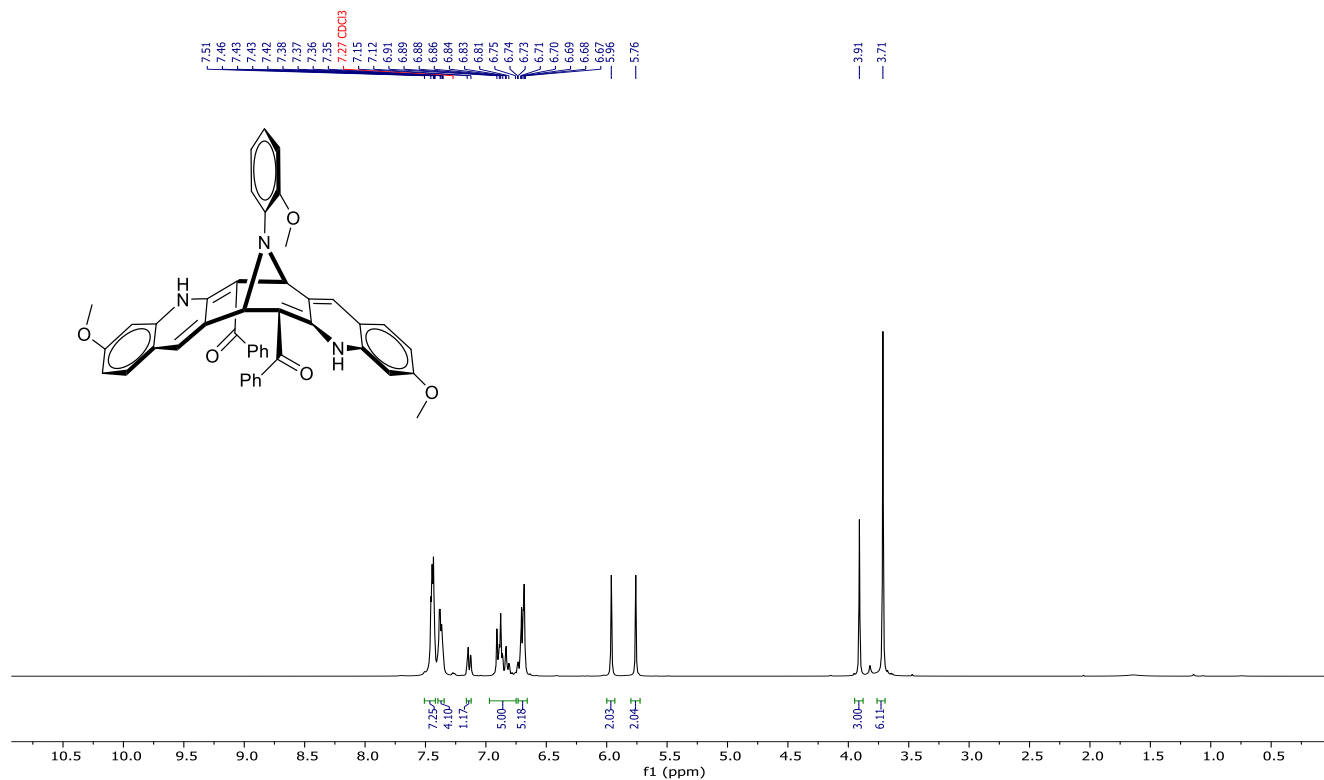

Figure S64:  $^1\text{H}$  NMR Compound 3v (300 MHz,  $\text{CDCl}_3$ )

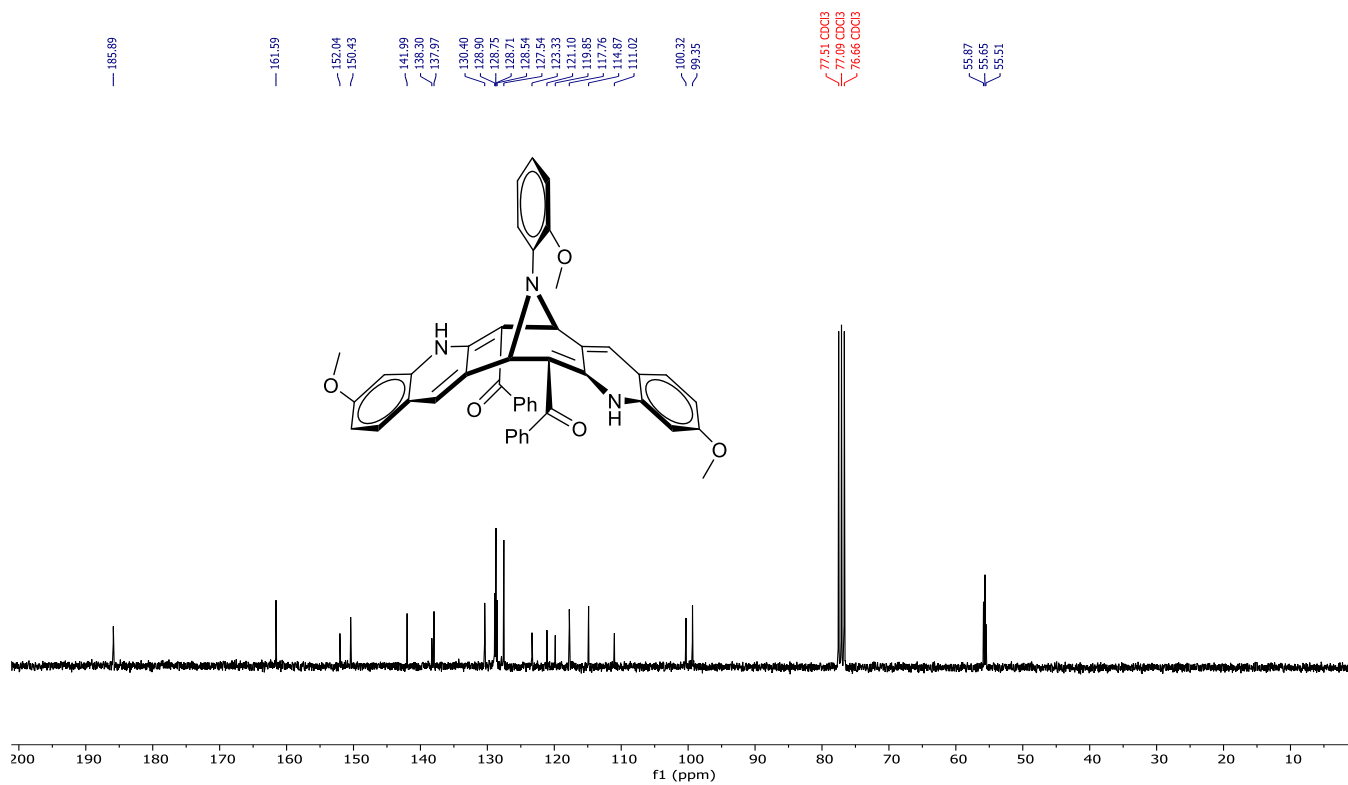

Figure S65:  $^{13}\text{C}\{^1\text{H}\}$  NMR Compound 3v (75 MHz,  $\text{CDCl}_3$ )

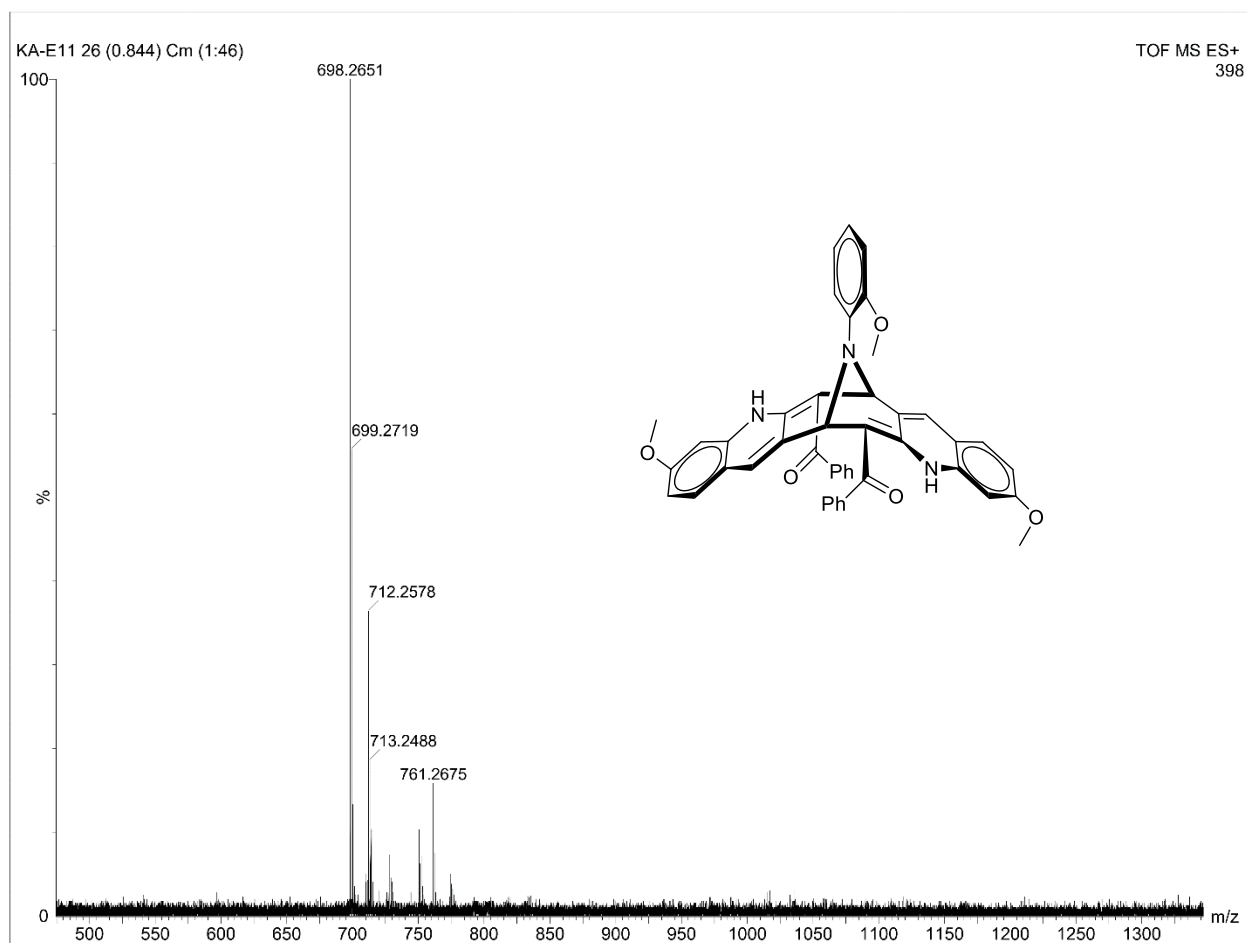Figure S66: HRMS (ESI) of **3v**

Supporting Information

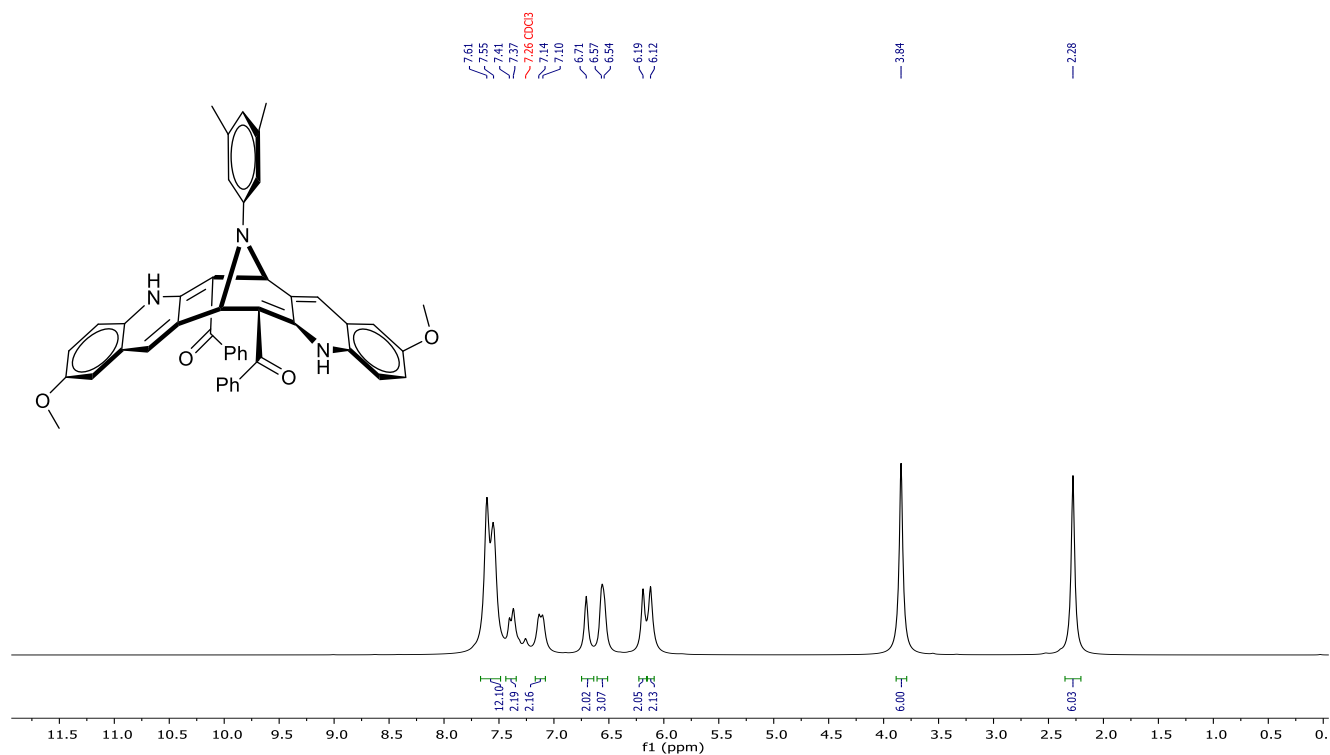

Figure S67: <sup>1</sup>H NMR Compound 3w (250 MHz, CDCl<sub>3</sub>)

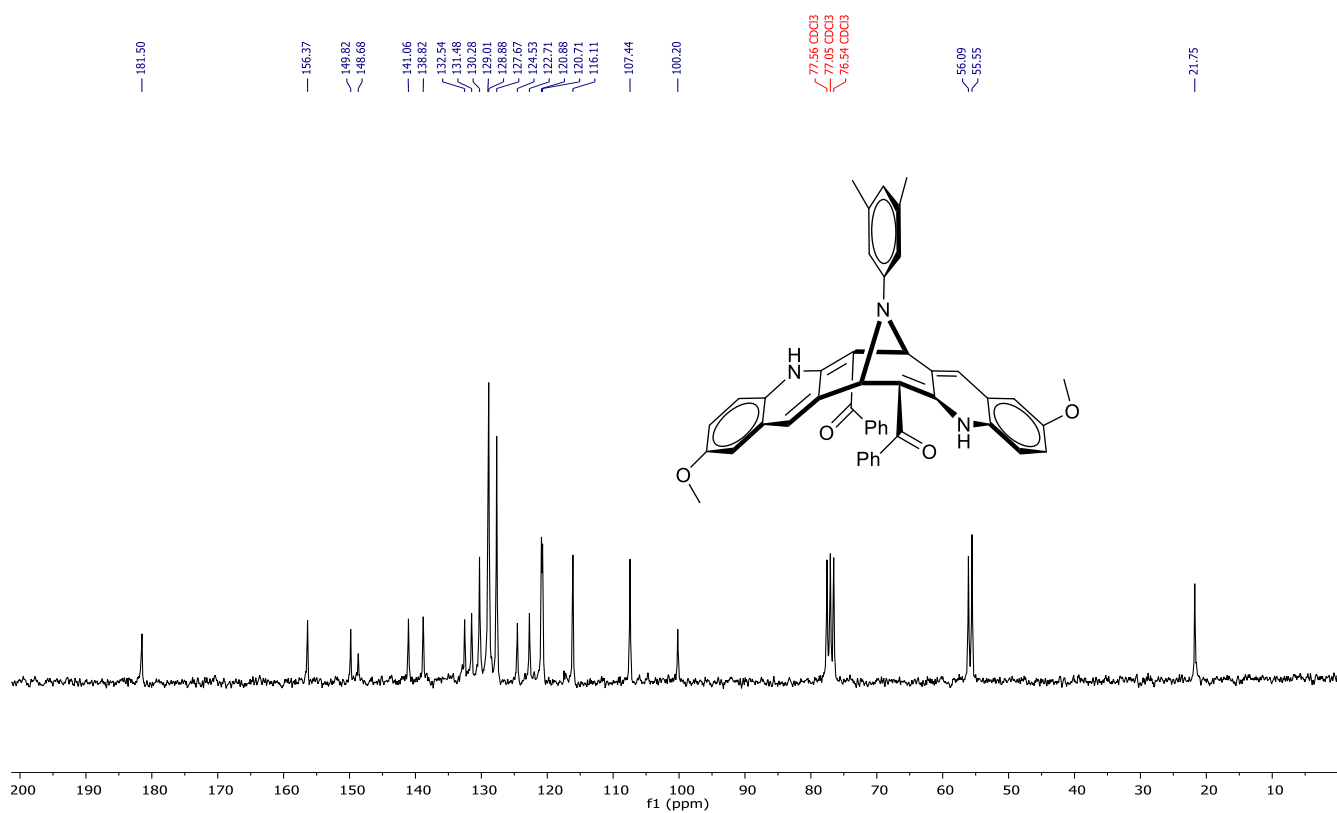

Figure S68: <sup>13</sup>C{<sup>1</sup>H}NMR Compound 3w (63 MHz, CDCl<sub>3</sub>)

## Supporting Information

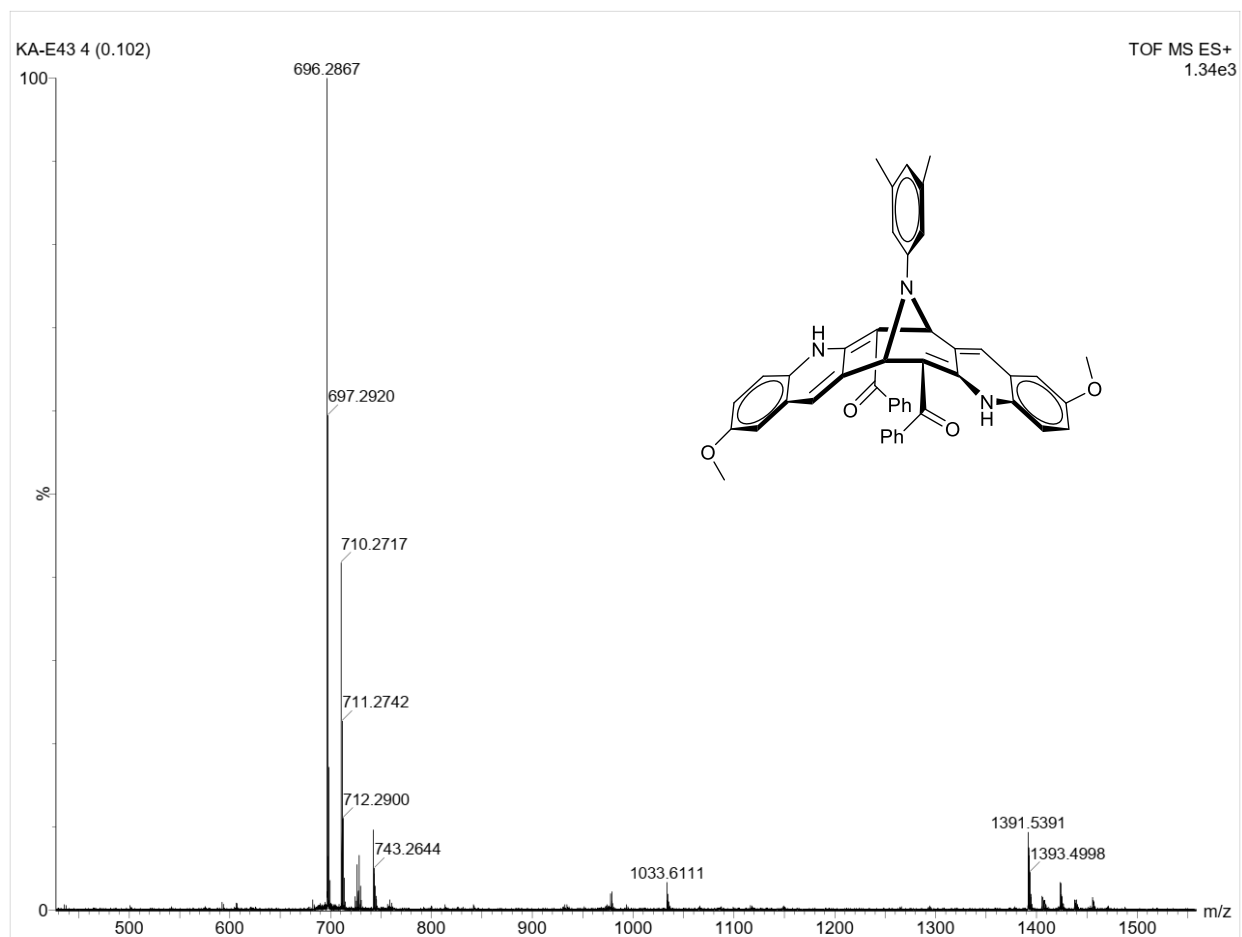

Figure S69: HRMS (ESI) of **3w**

Supporting Information

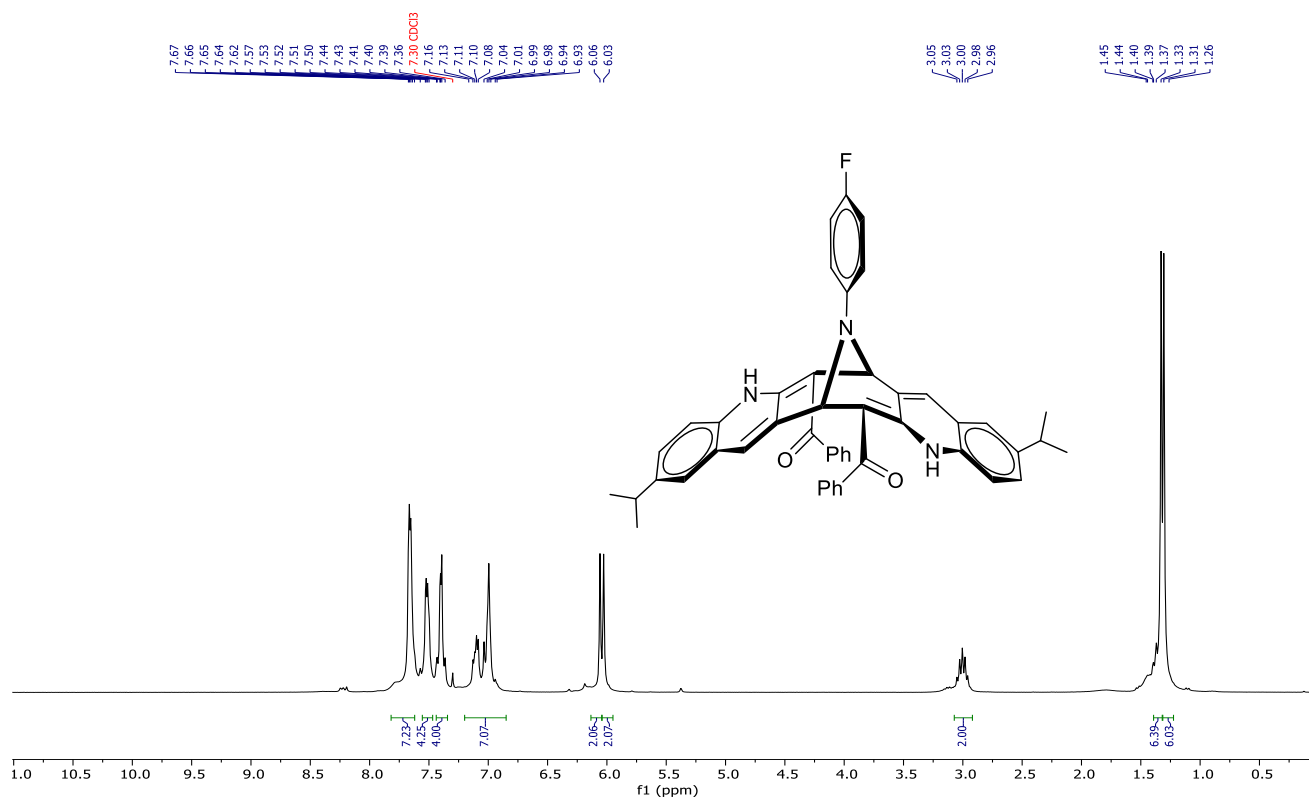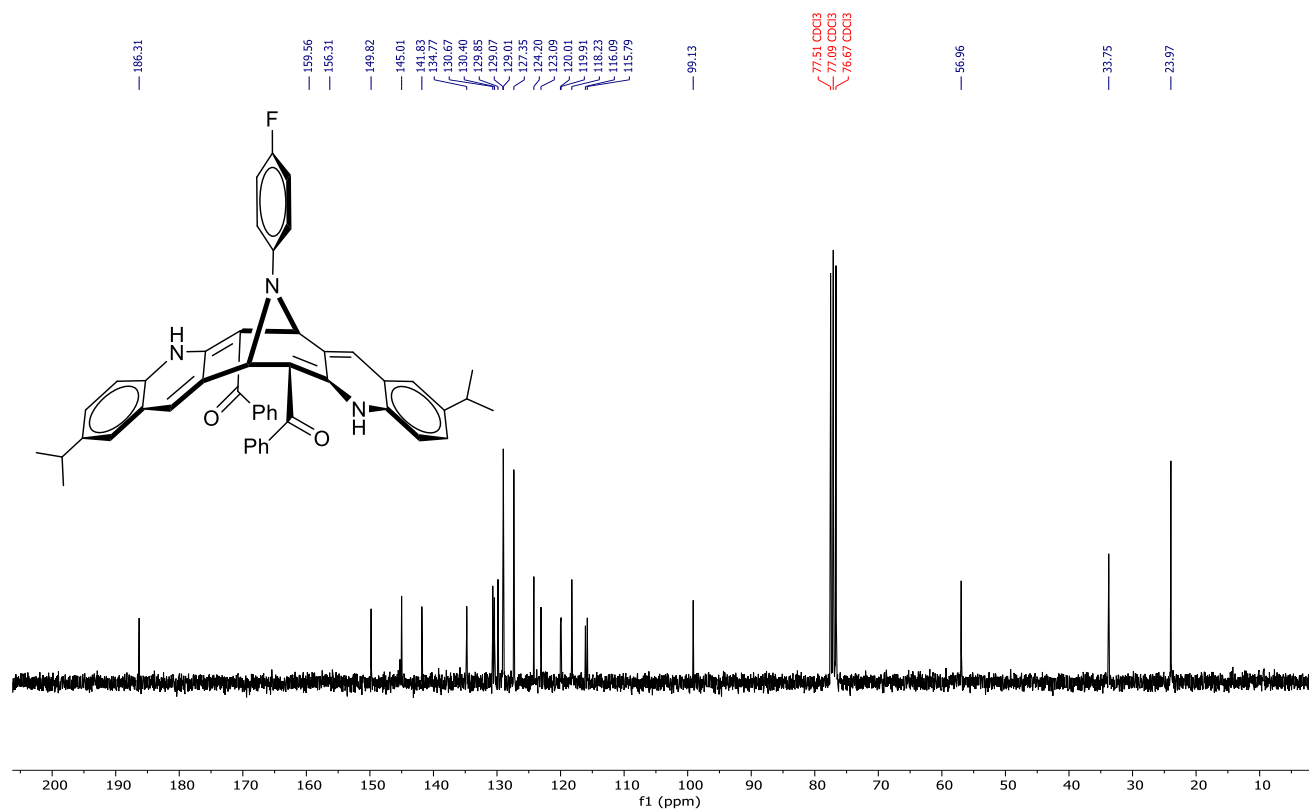

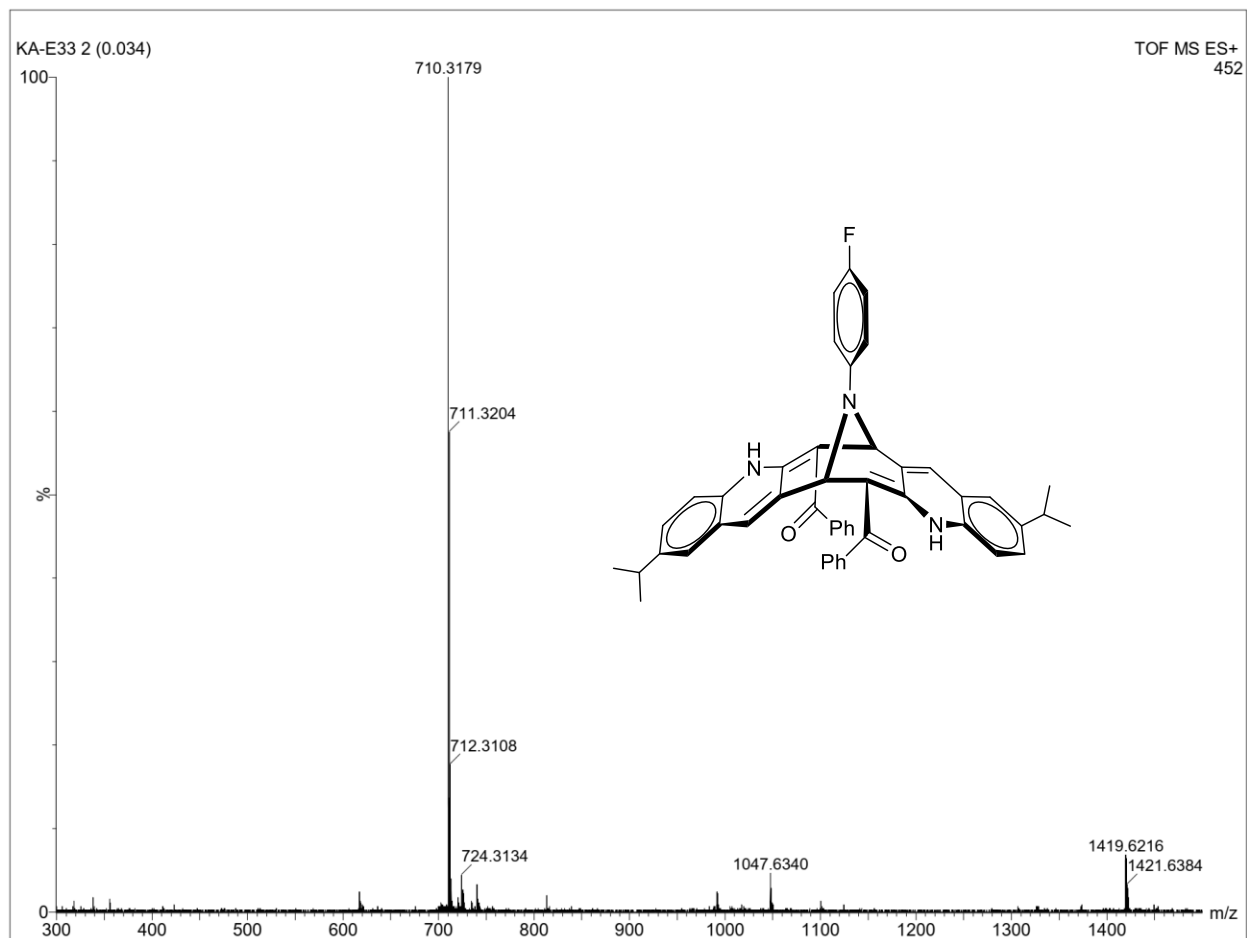Figure S72: HRMS (ESI) of **3x**



Supporting Information

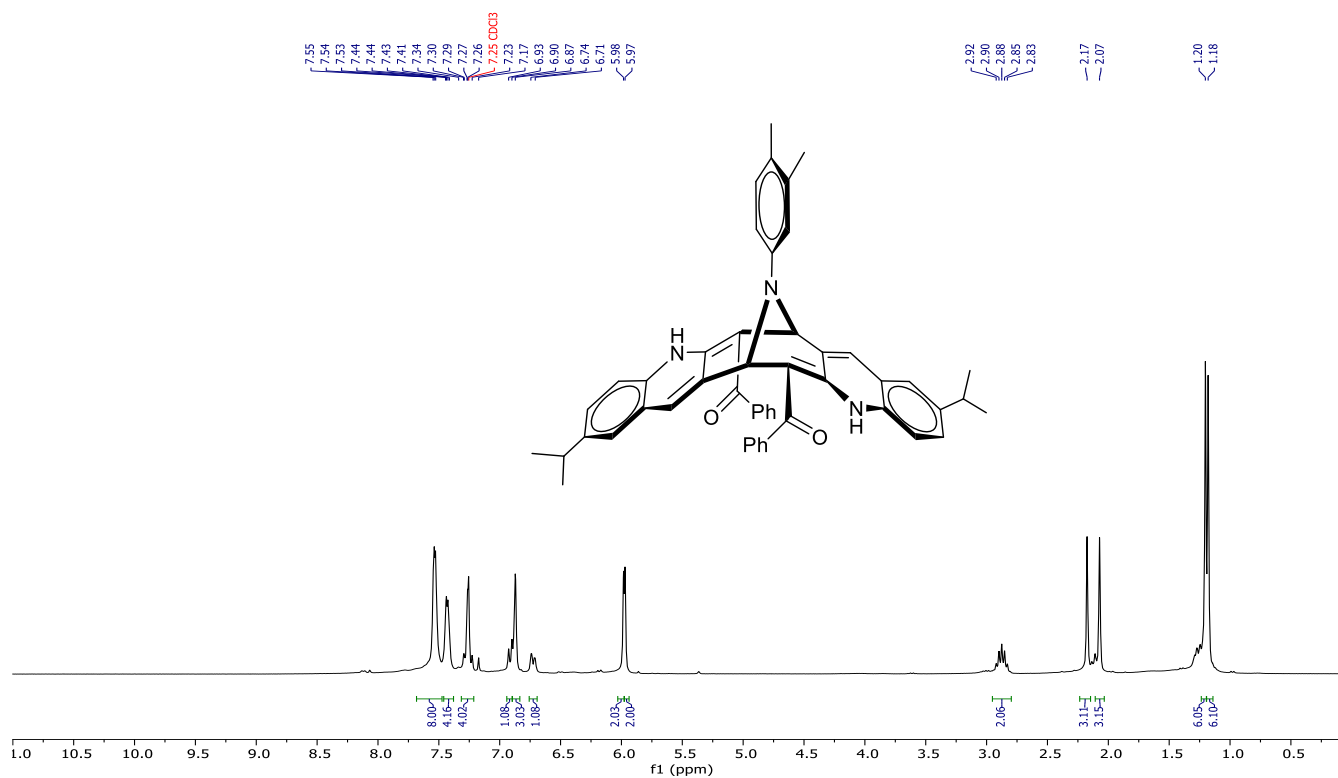

Figure S73:  $^1\text{H}$  NMR Compound **3y** (300 MHz,  $\text{CDCl}_3$ )

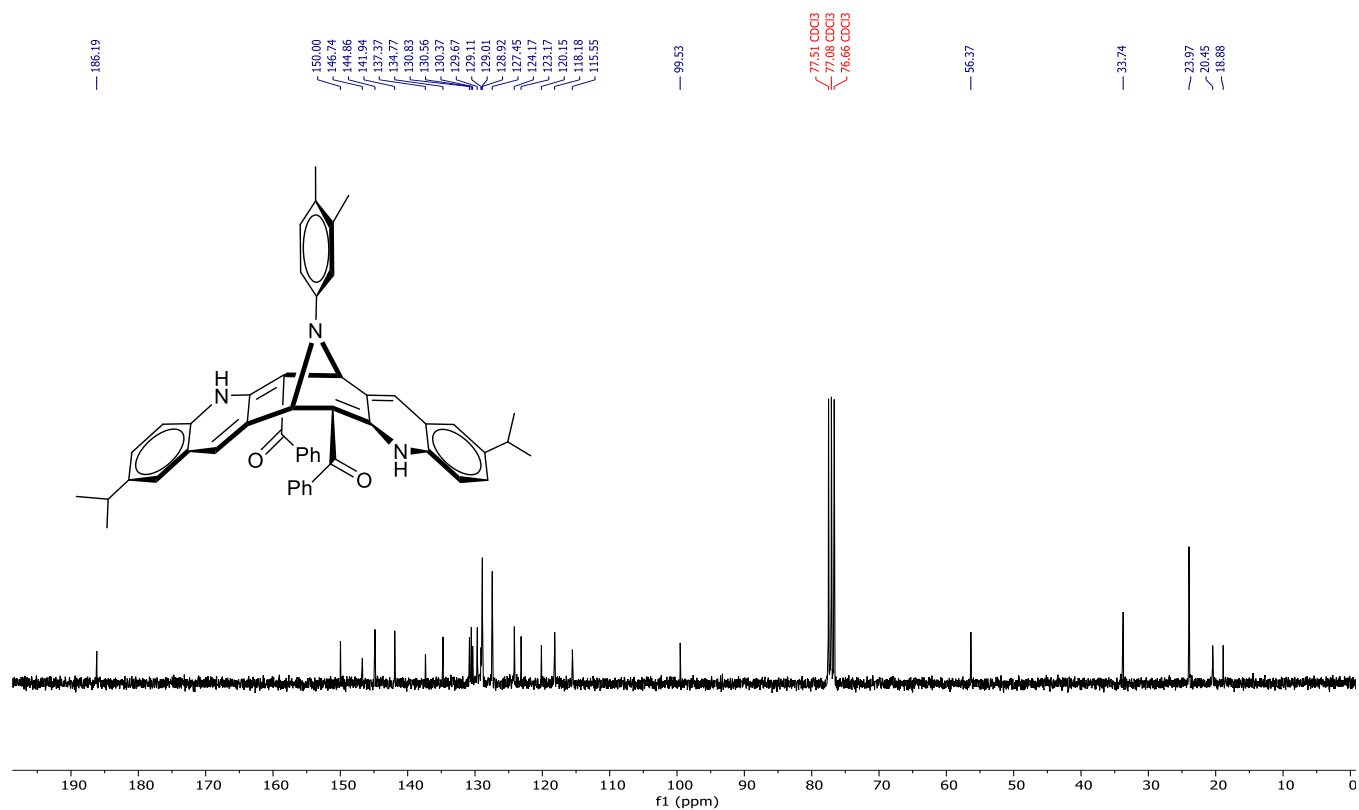

Figure S74:  $^{13}\text{C}\{^1\text{H}\}$  NMR Compound **3y** (75 MHz,  $\text{CDCl}_3$ )

## Supporting Information

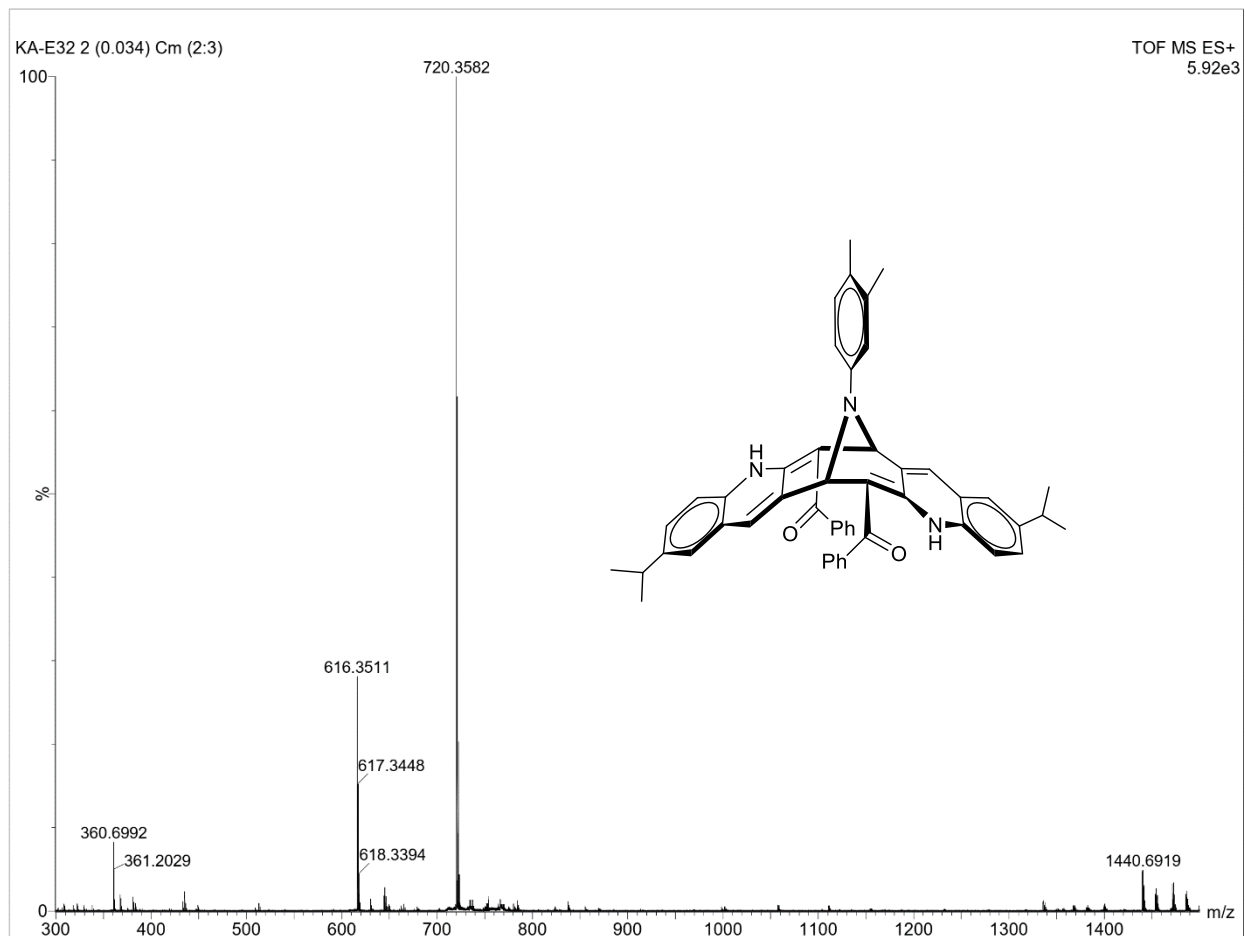

Figure S75: HRMS (ESI) of **3y**

Supporting Information

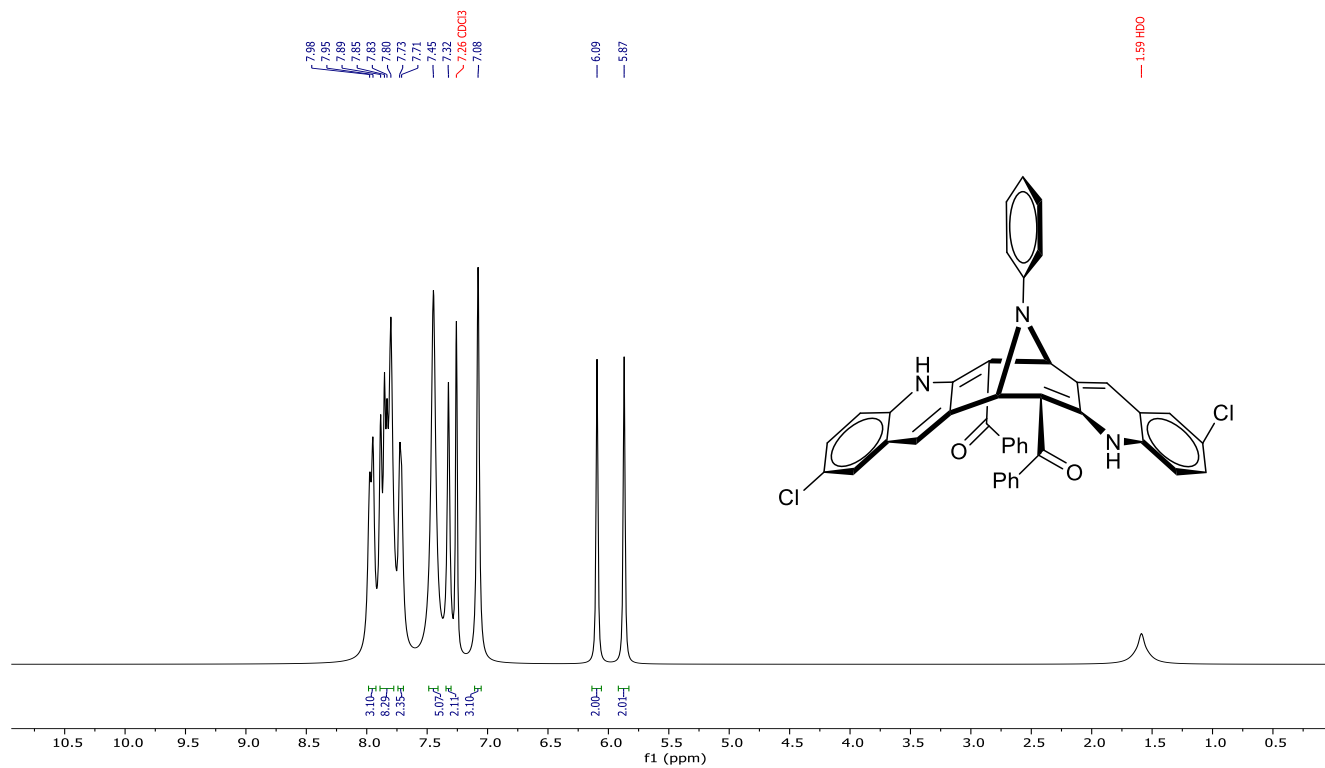

Figure S76:  $^1\text{H}$  NMR Compound **3z** (300 MHz,  $\text{CDCl}_3$ )

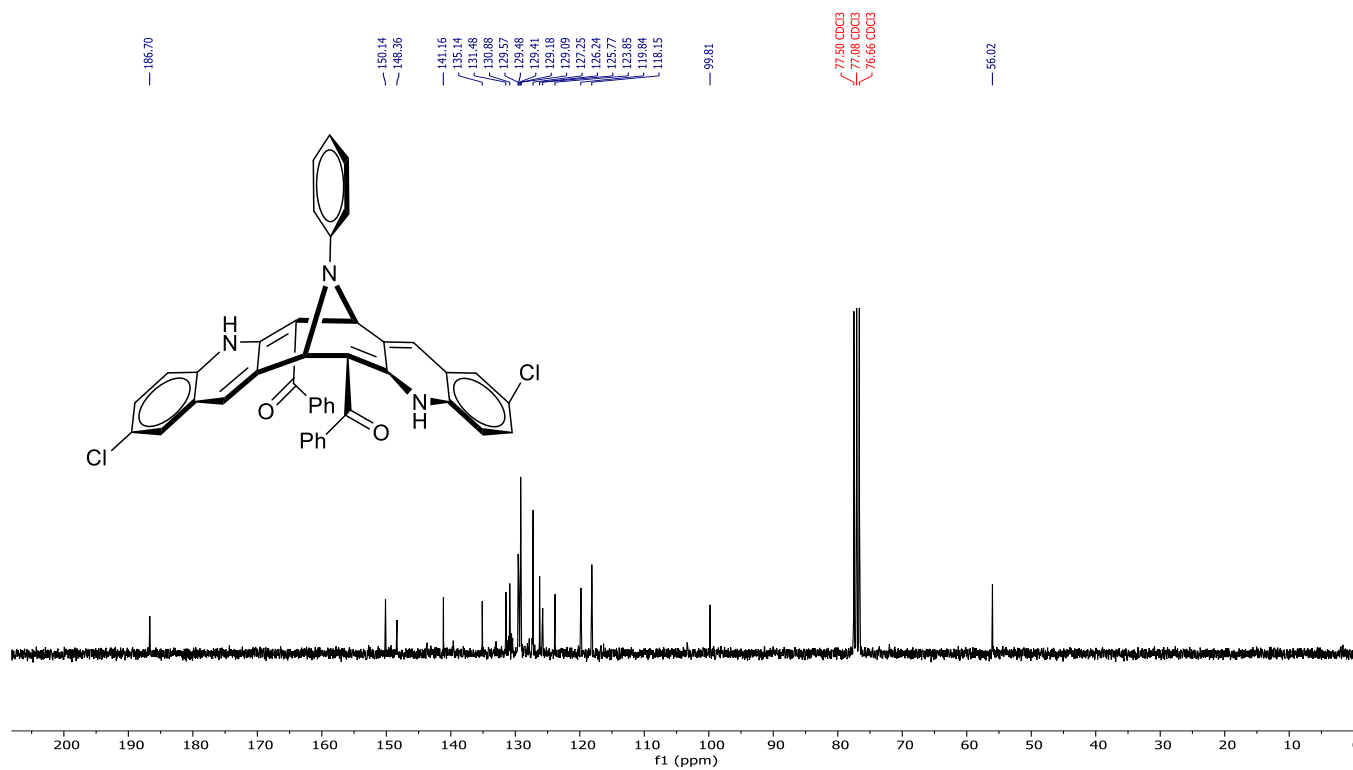

Figure S77:  $^{13}\text{C}\{^1\text{H}\}$  NMR Compound **3z** (75 MHz,  $\text{CDCl}_3$ )

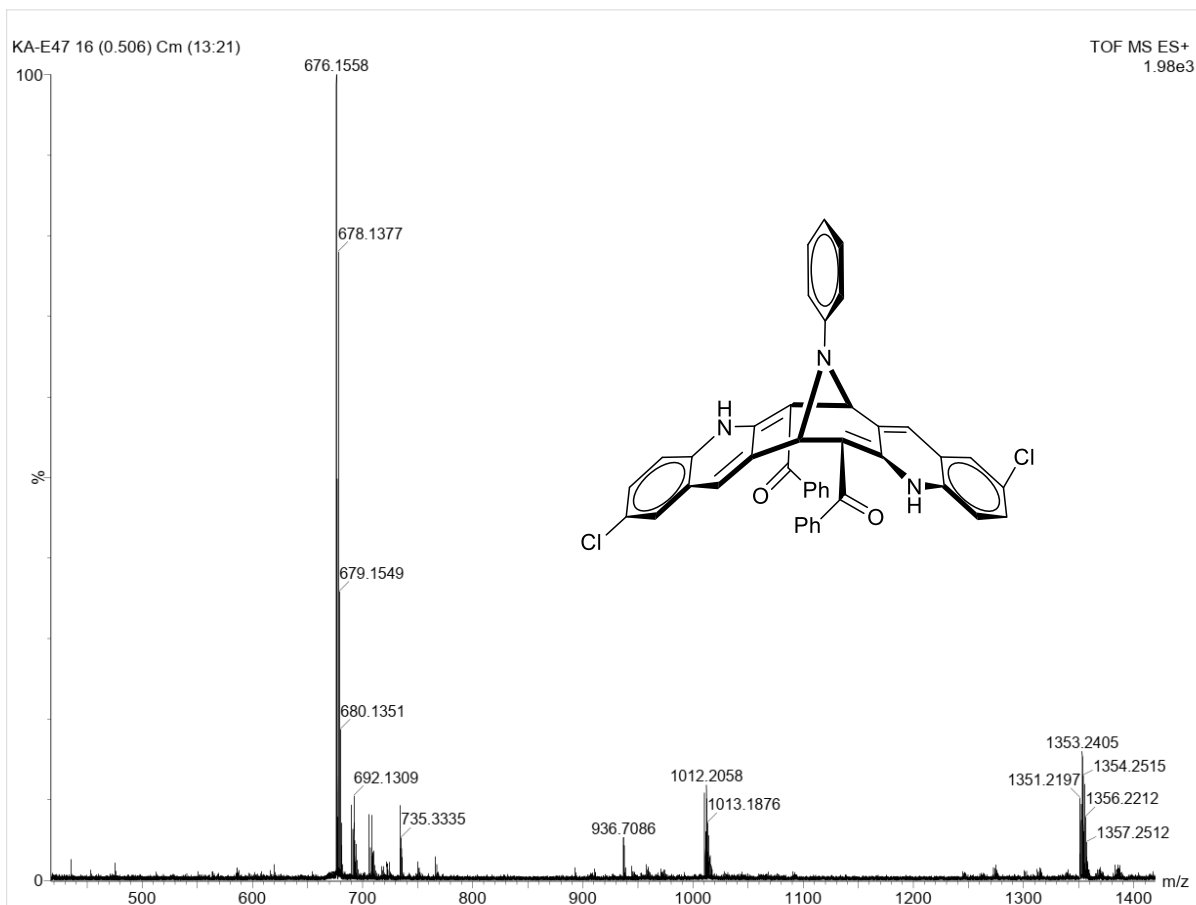Figure S78: HRMS (ESI) of **3z**

Supporting Information

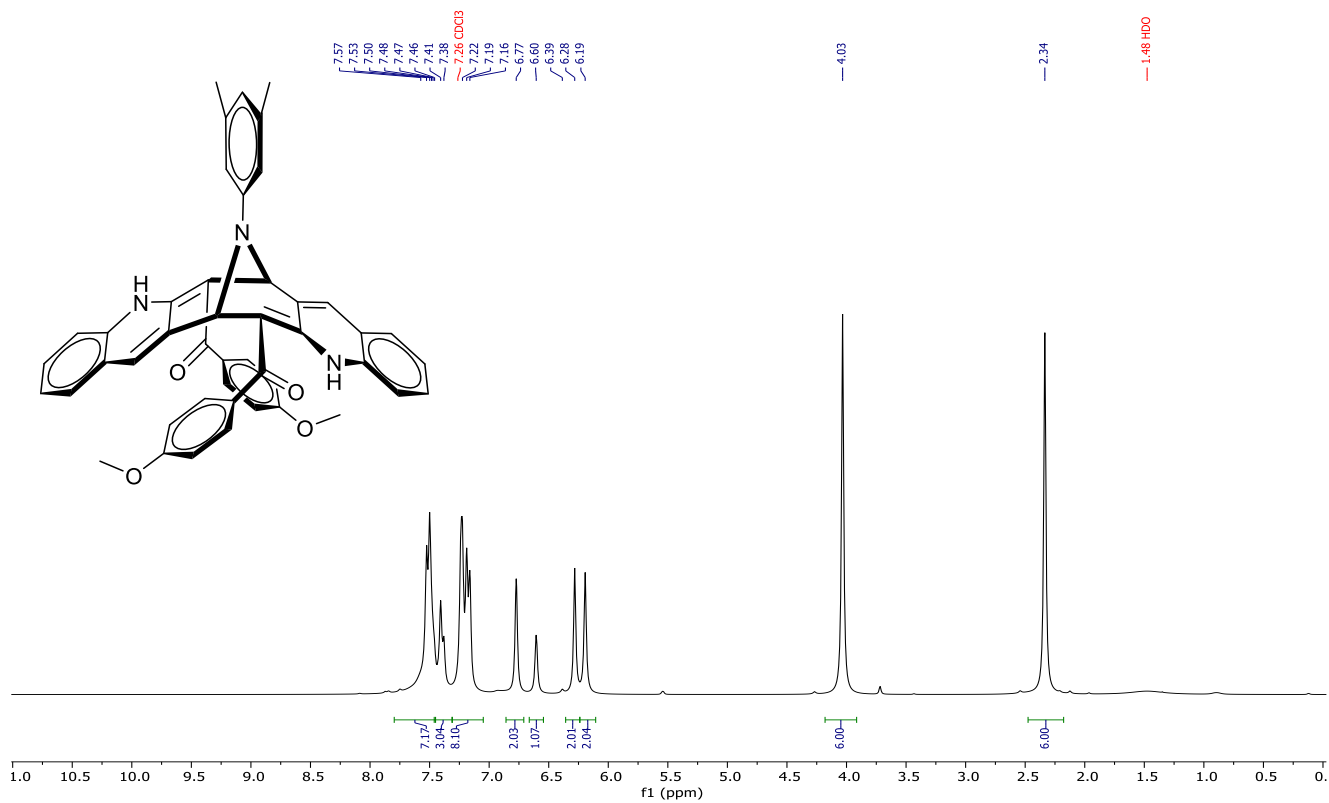

Figure S79:  $^1\text{H}$  NMR Compound 3aa (300 MHz,  $\text{CDCl}_3$ )

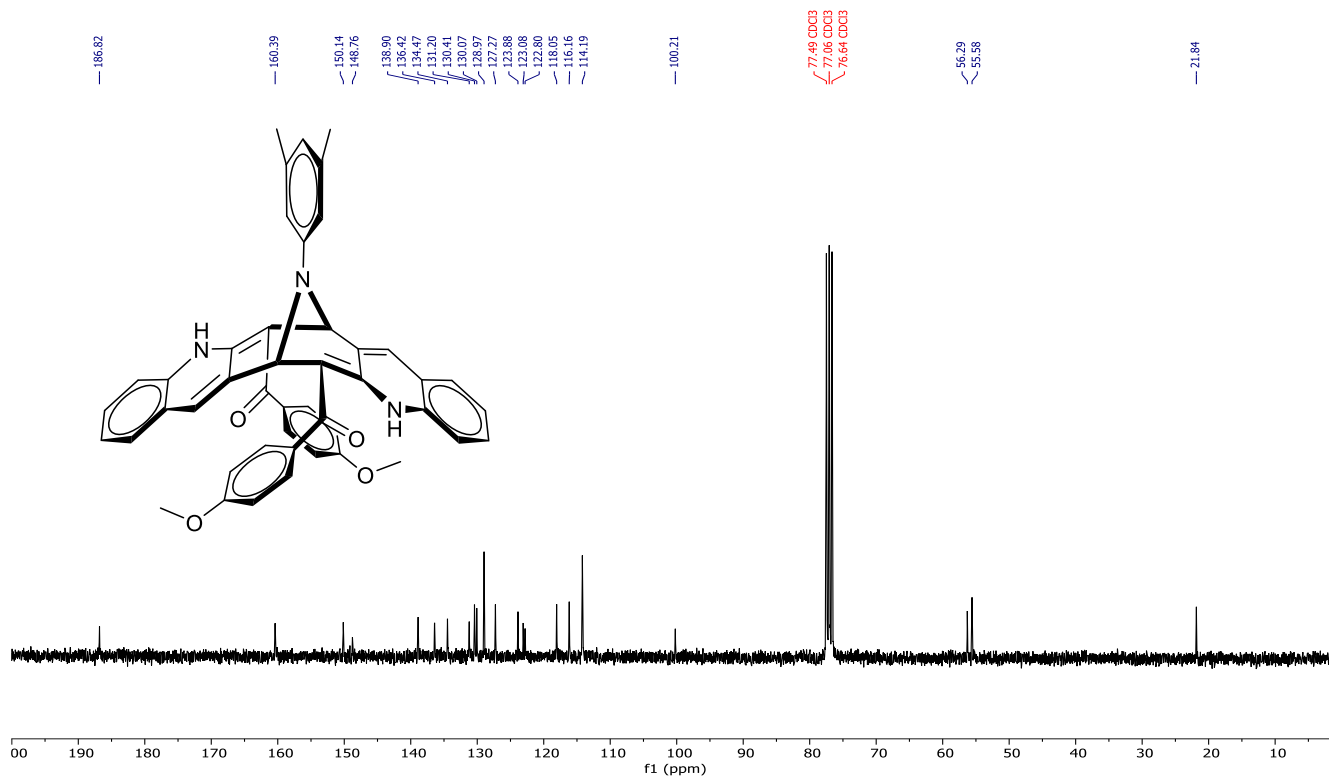

Figure S80:  $^{13}\text{C}\{^1\text{H}\}$  NMR Compound 3aa (75 MHz,  $\text{CDCl}_3$ )

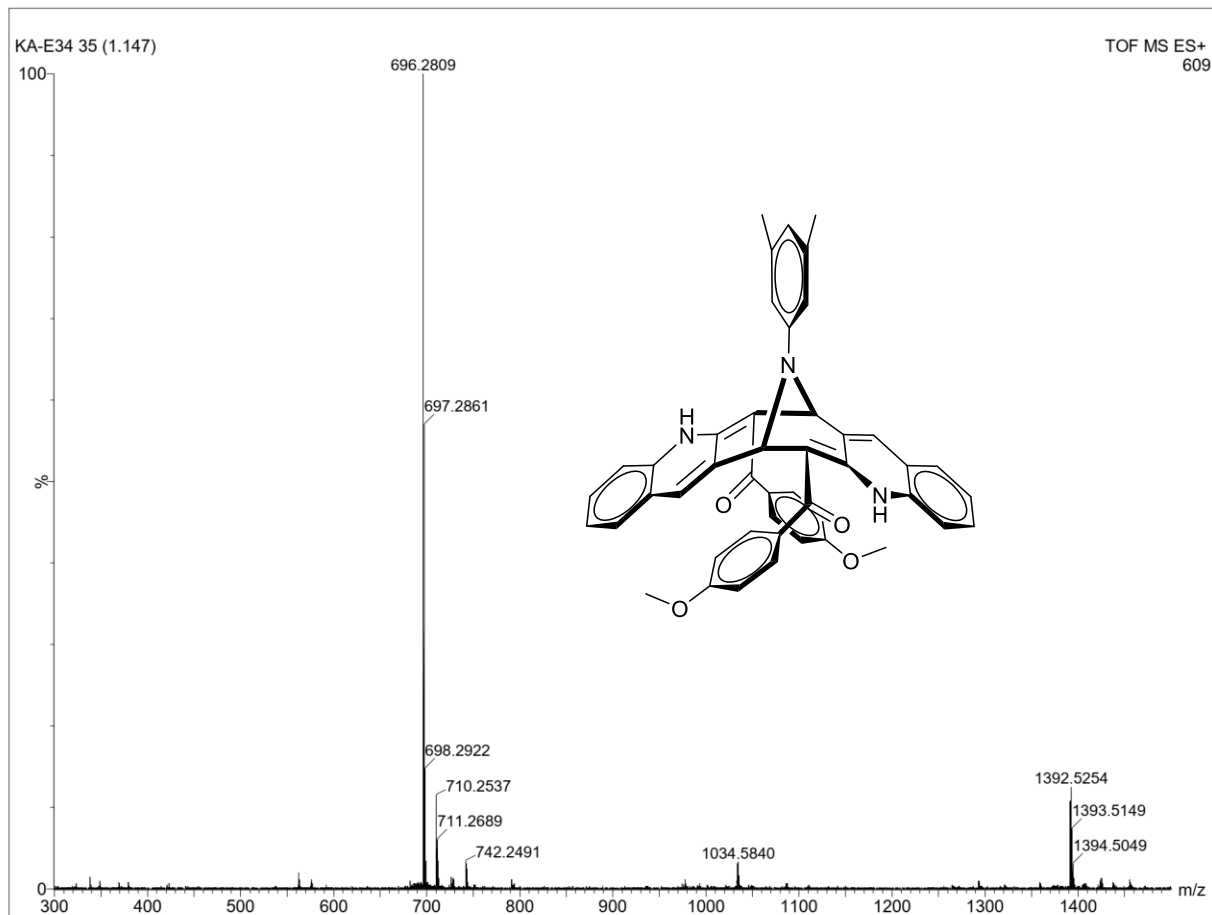Figure S81: HRMS (ESI) of **3aa**

Supporting Information

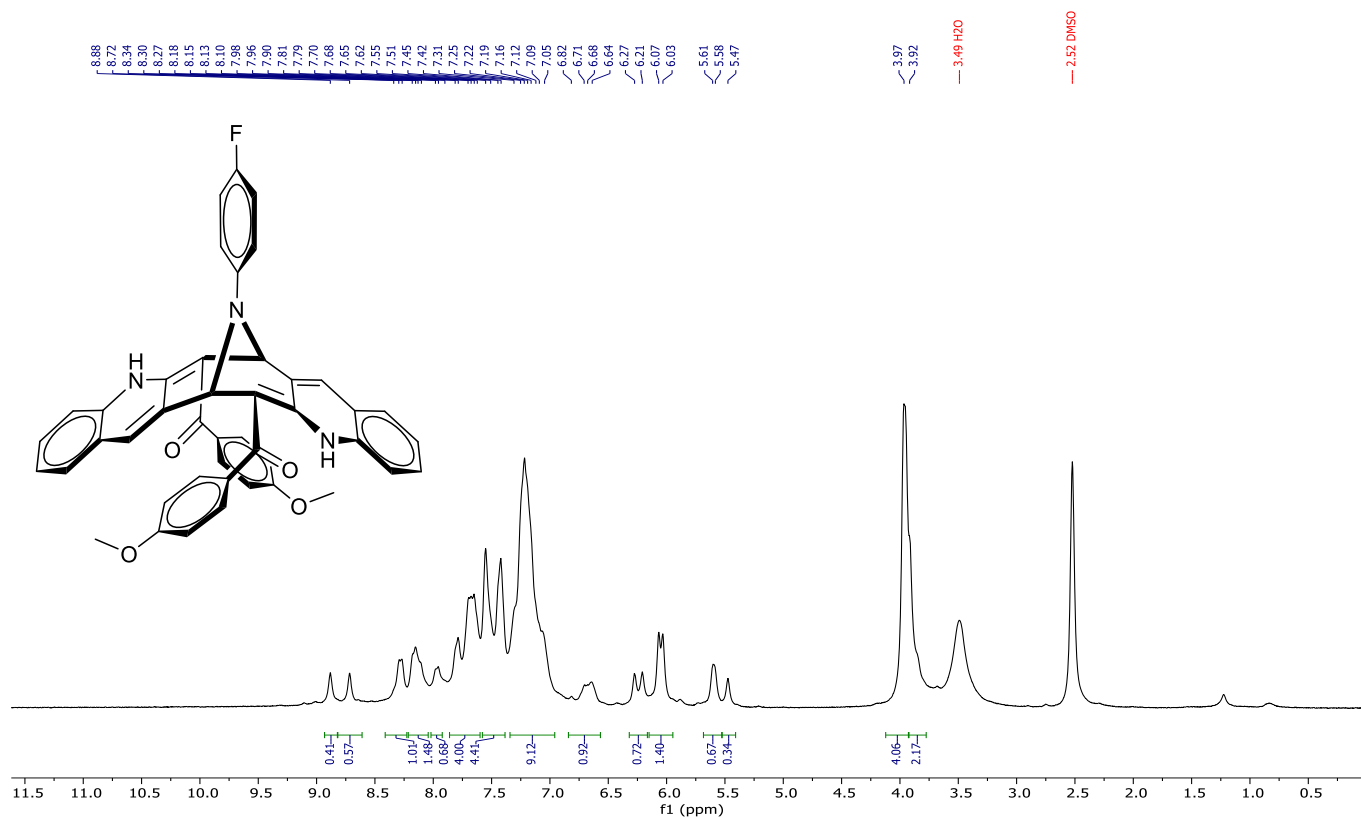

Figure S82:  $^1\text{H}$  NMR Compound **3ab** (300 MHz,  $\text{CDCl}_3$ )

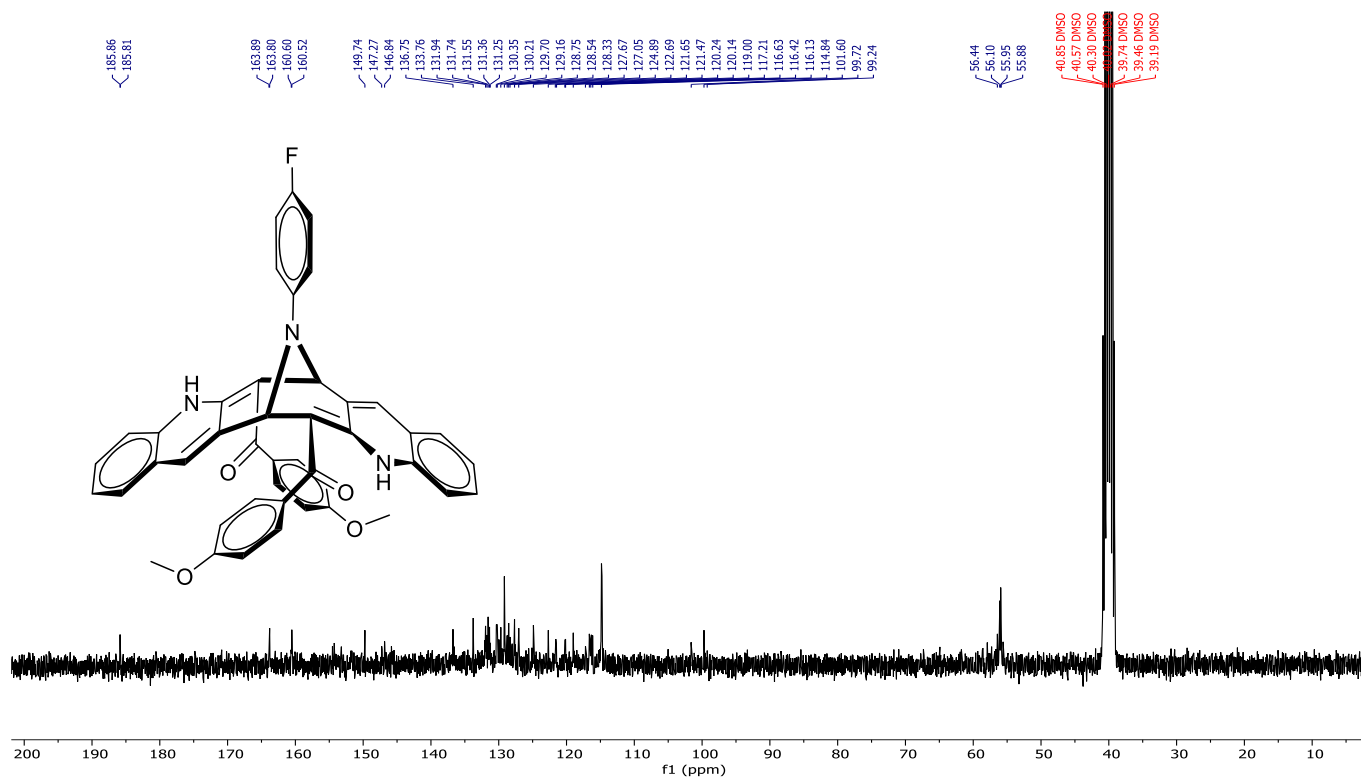

Figure S83:  $^{13}\text{C}\{^1\text{H}\}$  NMR Compound **3ab** (75 MHz,  $\text{CDCl}_3$ )

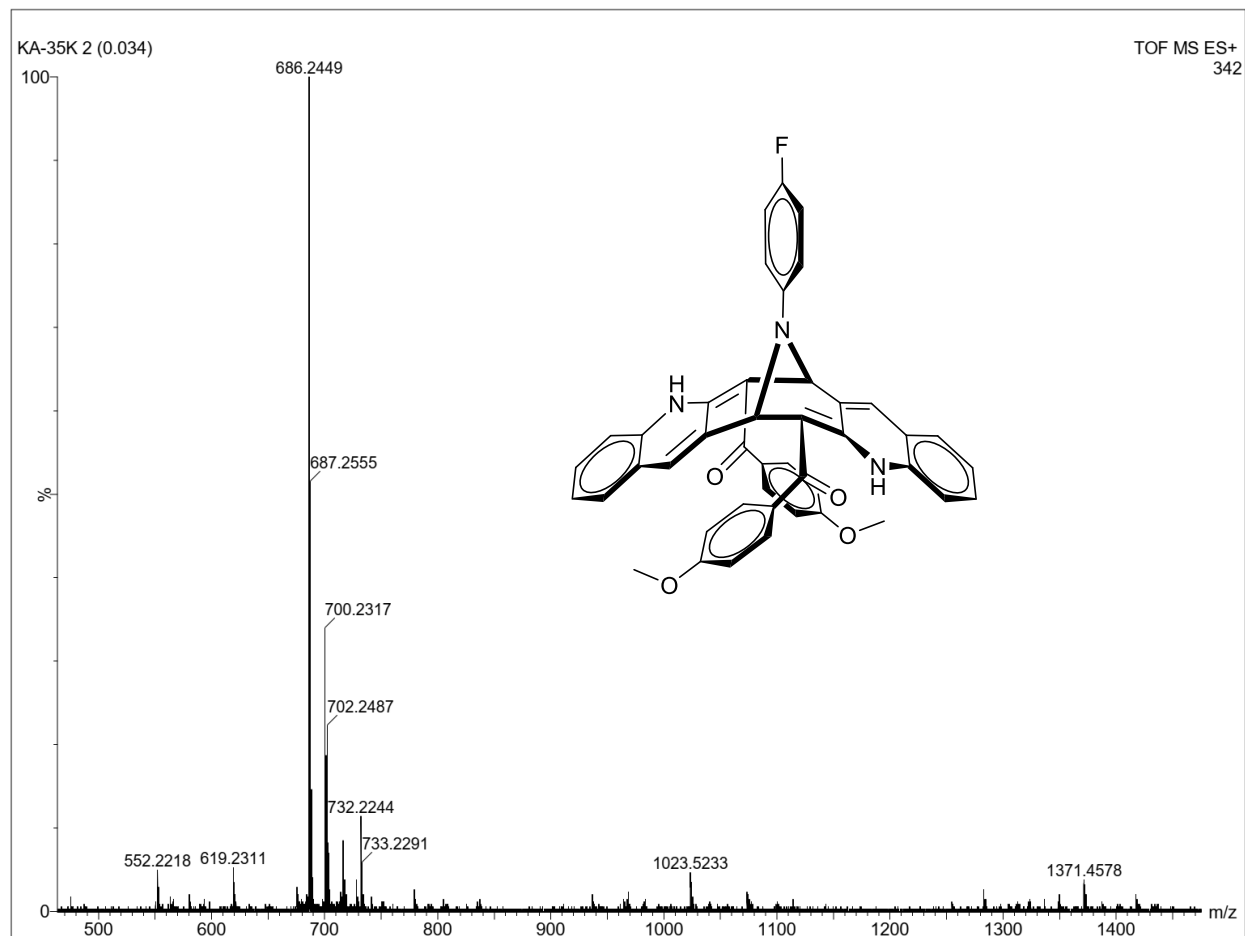Figure S84: HRMS (ESI) of **3ab**



Supporting Information

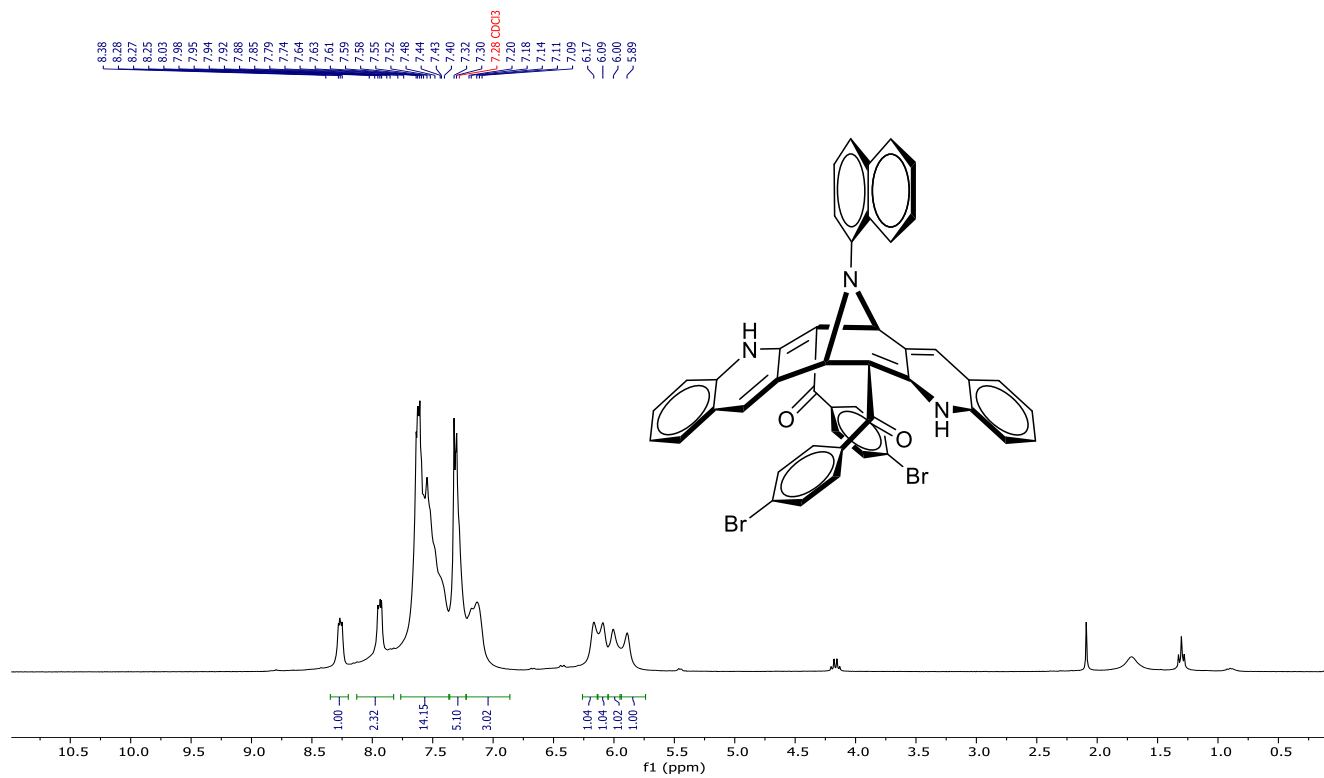

Figure S85: <sup>1</sup>H NMR Compound 3ac (300 MHz, CDCl<sub>3</sub>)

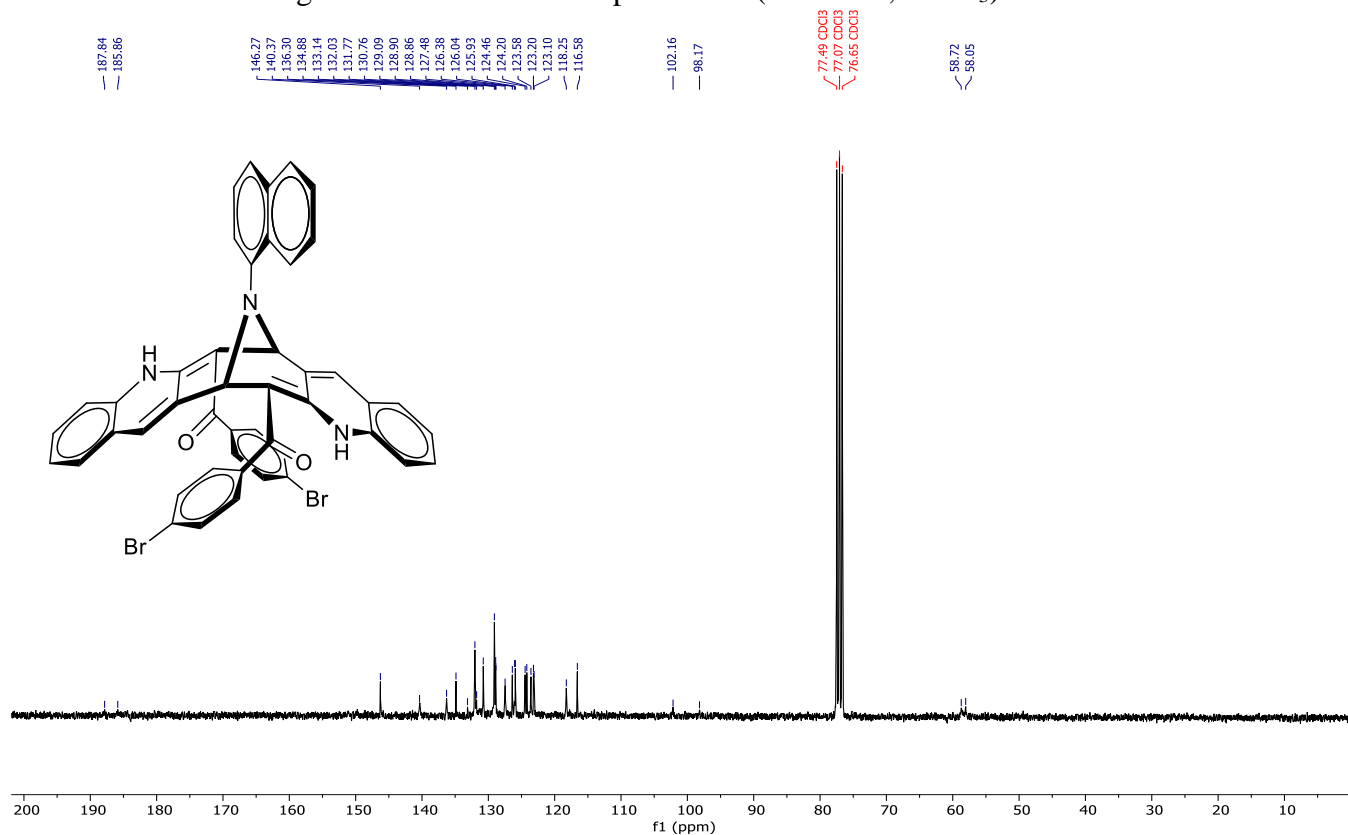

Figure S86: <sup>13</sup>C{<sup>1</sup>H}NMR Compound 3ac (75 MHz, CDCl<sub>3</sub>)

## Supporting Information

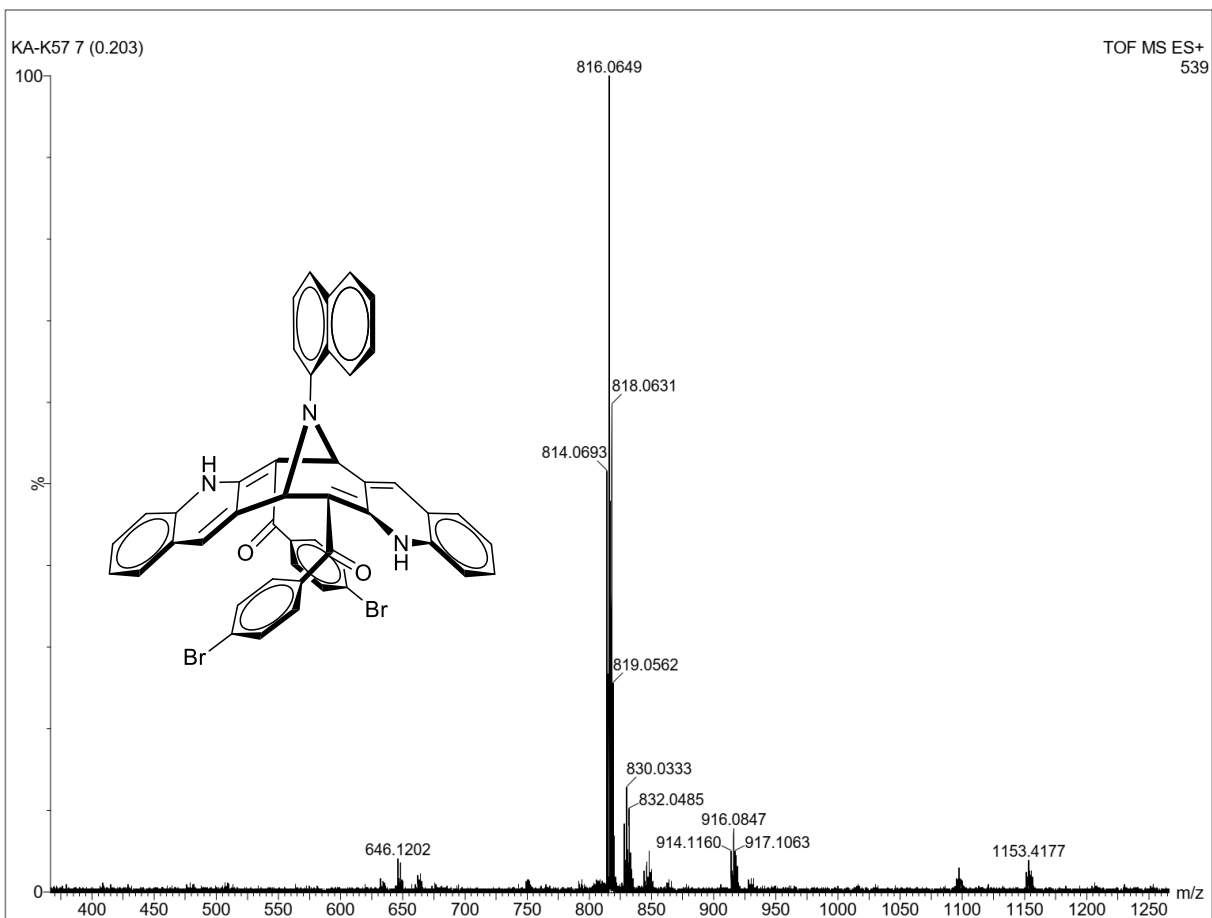

Figure S87: HRMS (ESI) of **3ac**

## Supporting Information

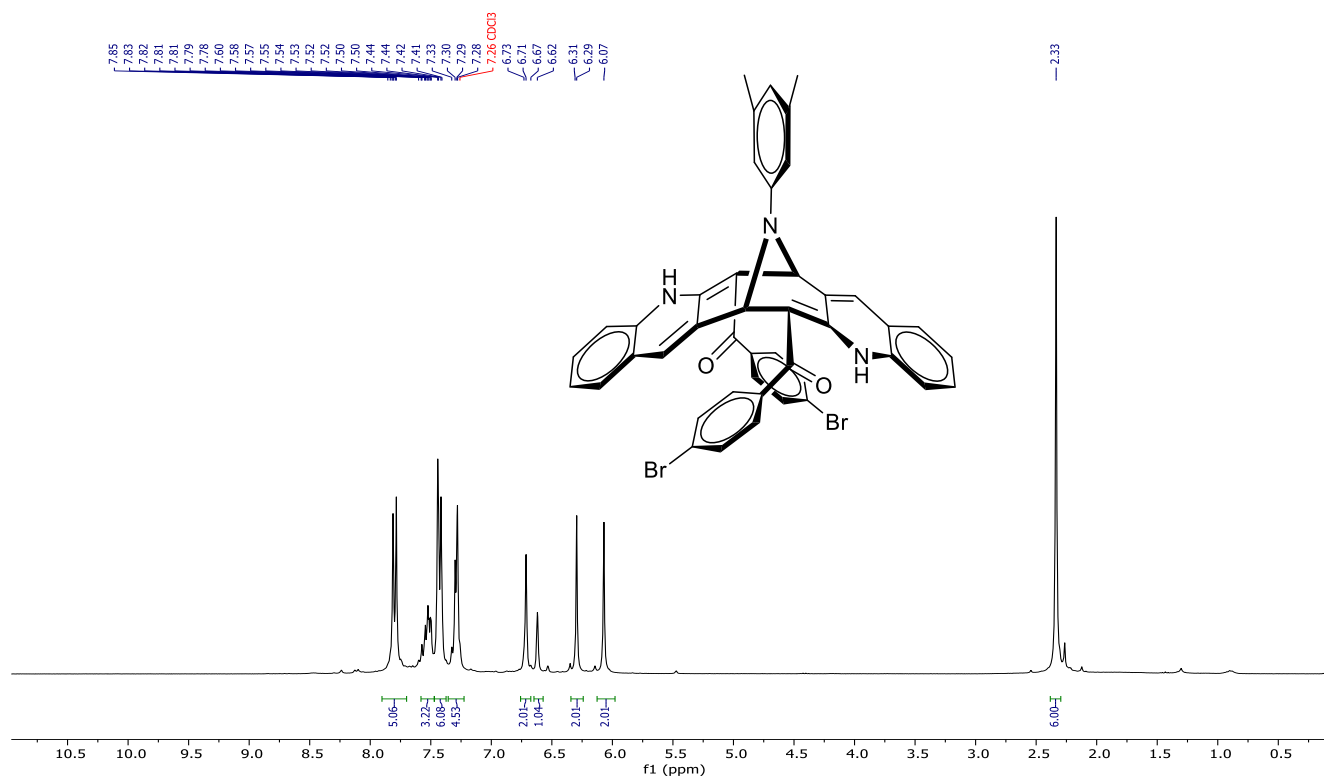

Figure S88:  $^1\text{H}$  NMR Compound **3ad** (300 MHz,  $\text{CDCl}_3$ )

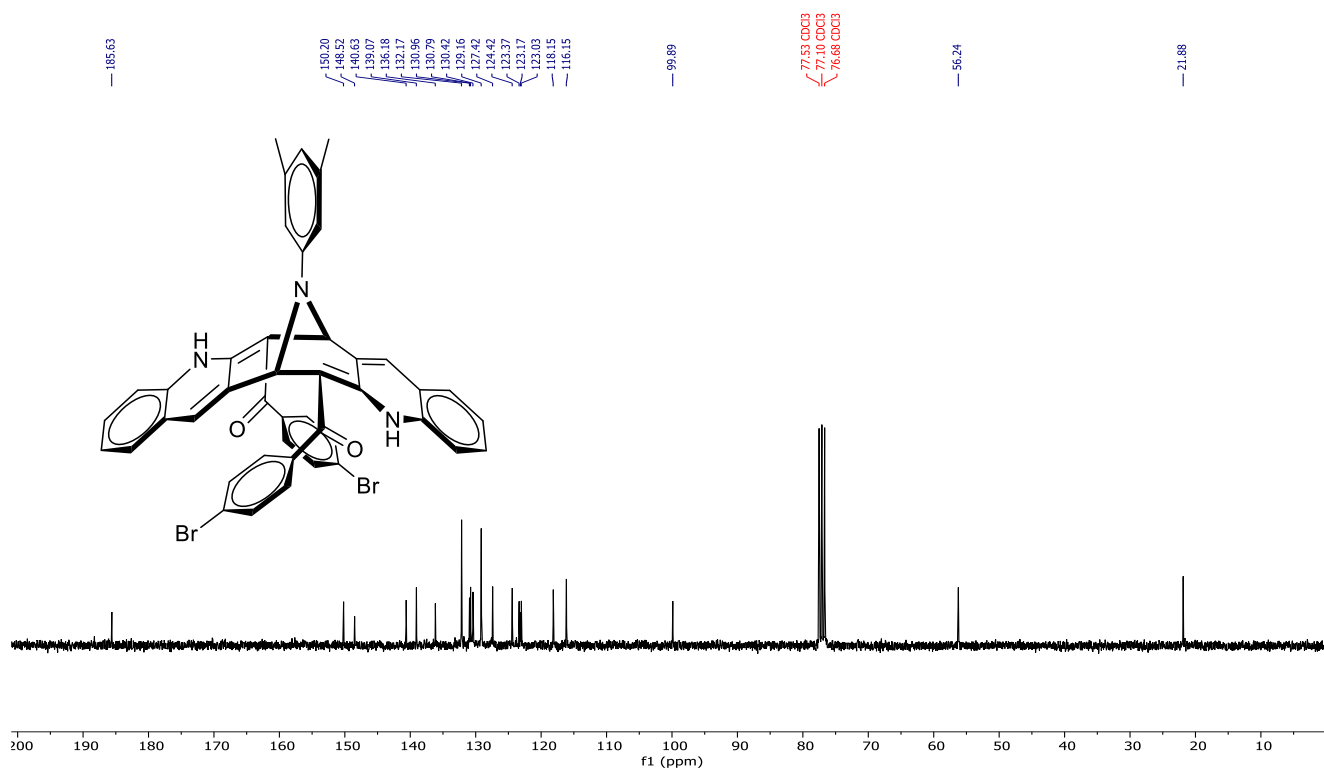

Figure S89:  $^{13}\text{C}\{^1\text{H}\}$  NMR Compound **3ad** (75 MHz,  $\text{CDCl}_3$ )

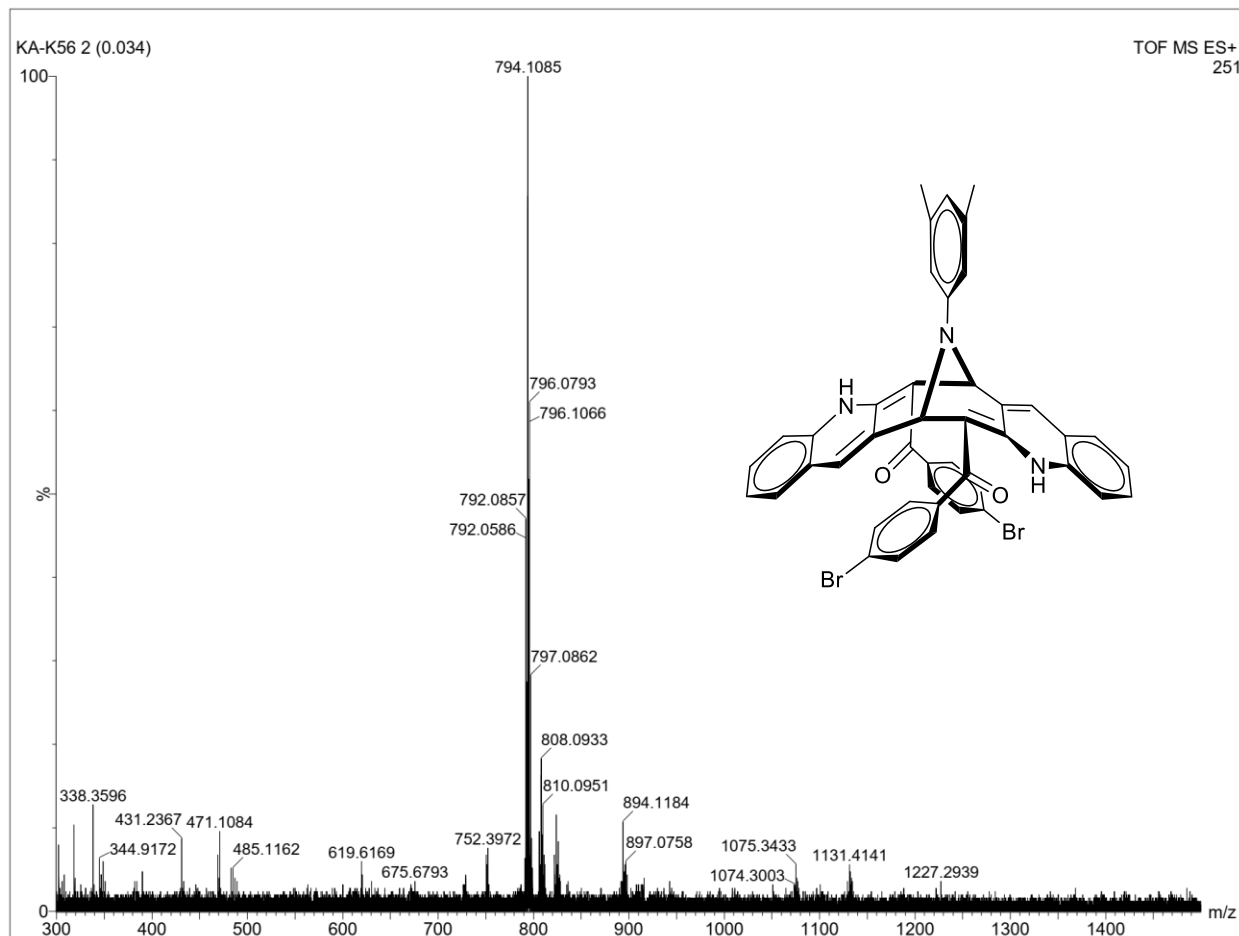Figure S90: HRMS (ESI) of **3ad**

Supporting Information

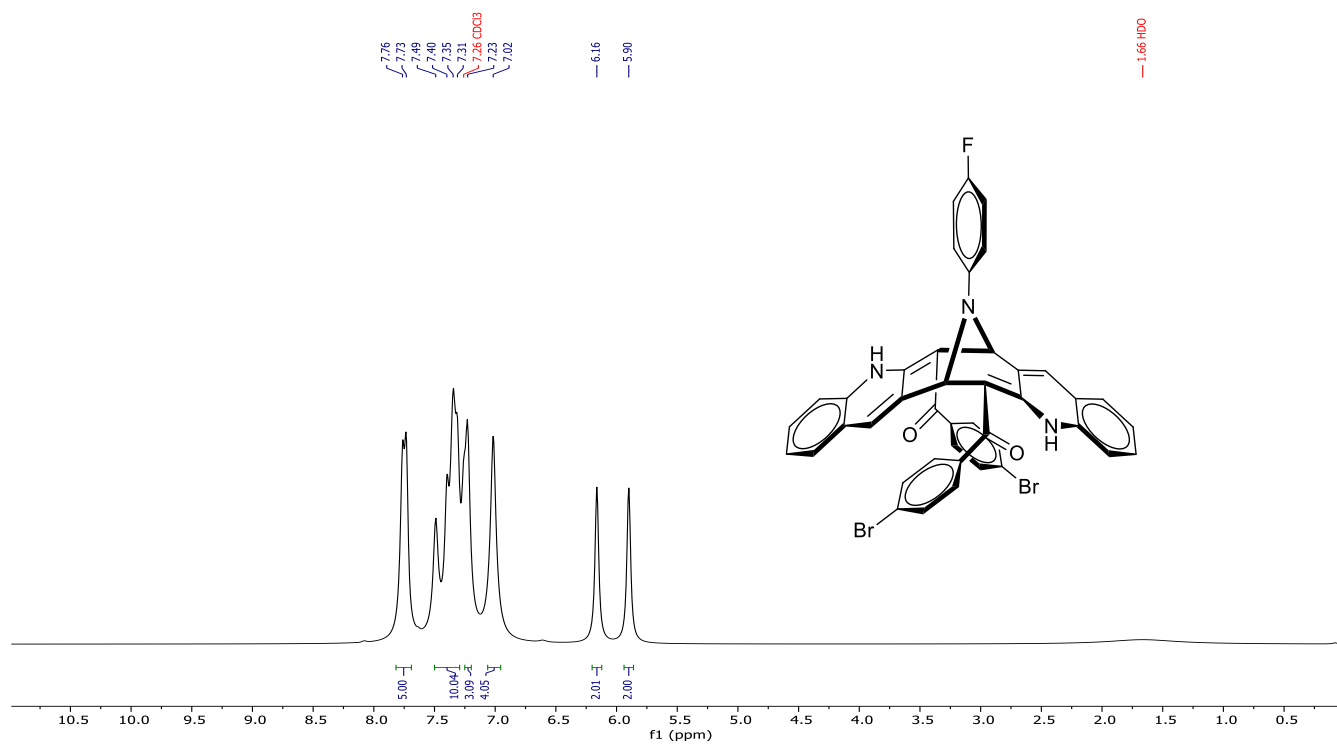

Figure S91:  $^1\text{H}$  NMR Compound 3ae (300 MHz, CDCl<sub>3</sub>)

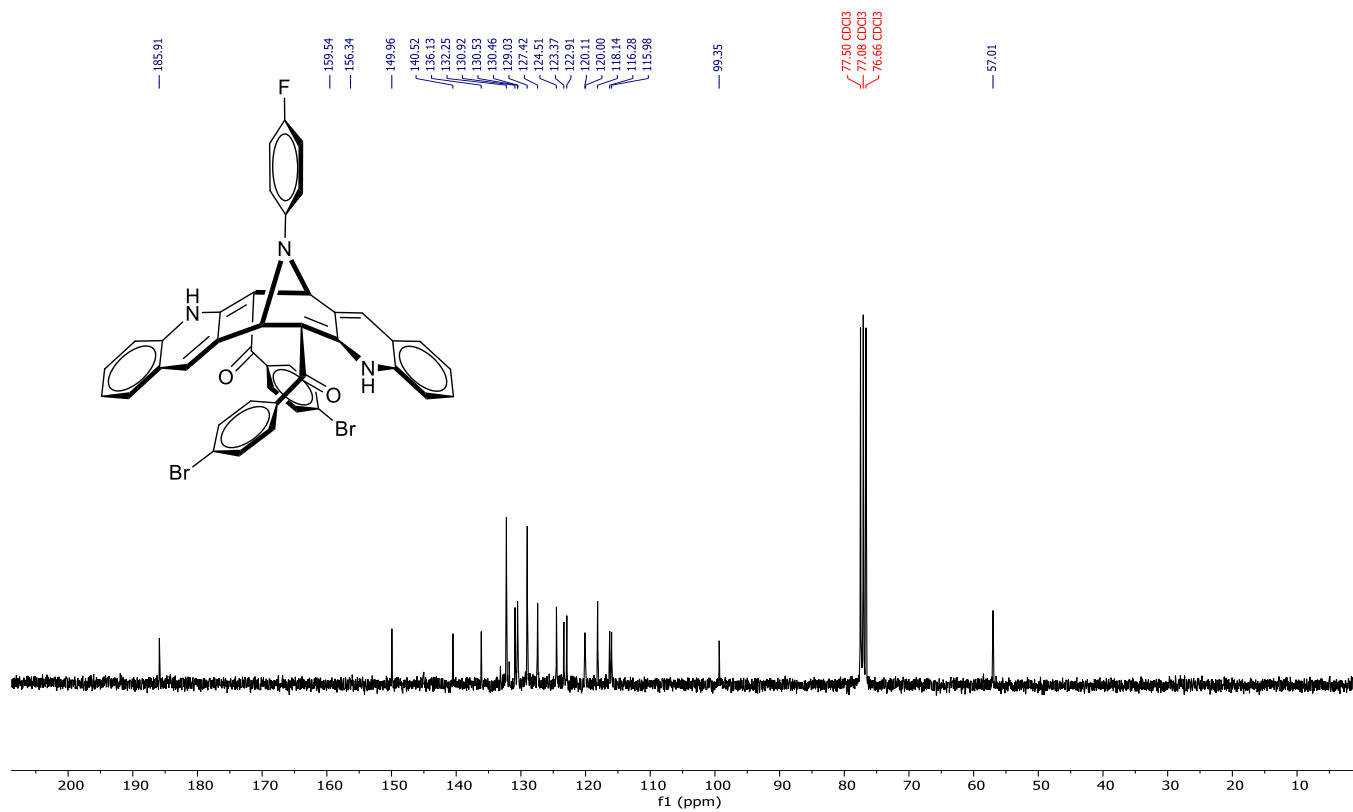

Figure S92:  $^{13}\text{C}\{^1\text{H}\}$  NMR Compound 3ae (75 MHz, CDCl<sub>3</sub>)

## Supporting Information

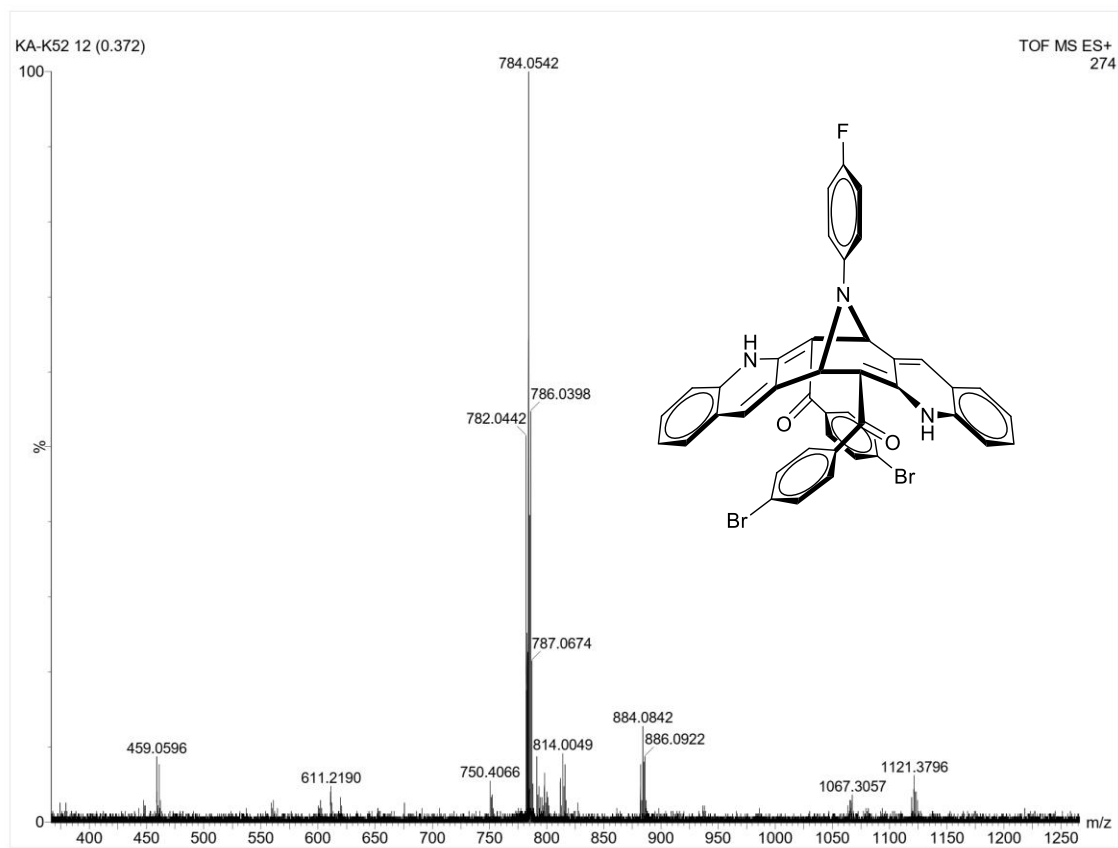

Figure S93: HRMS (ESI) of **3ae**

Supporting Information

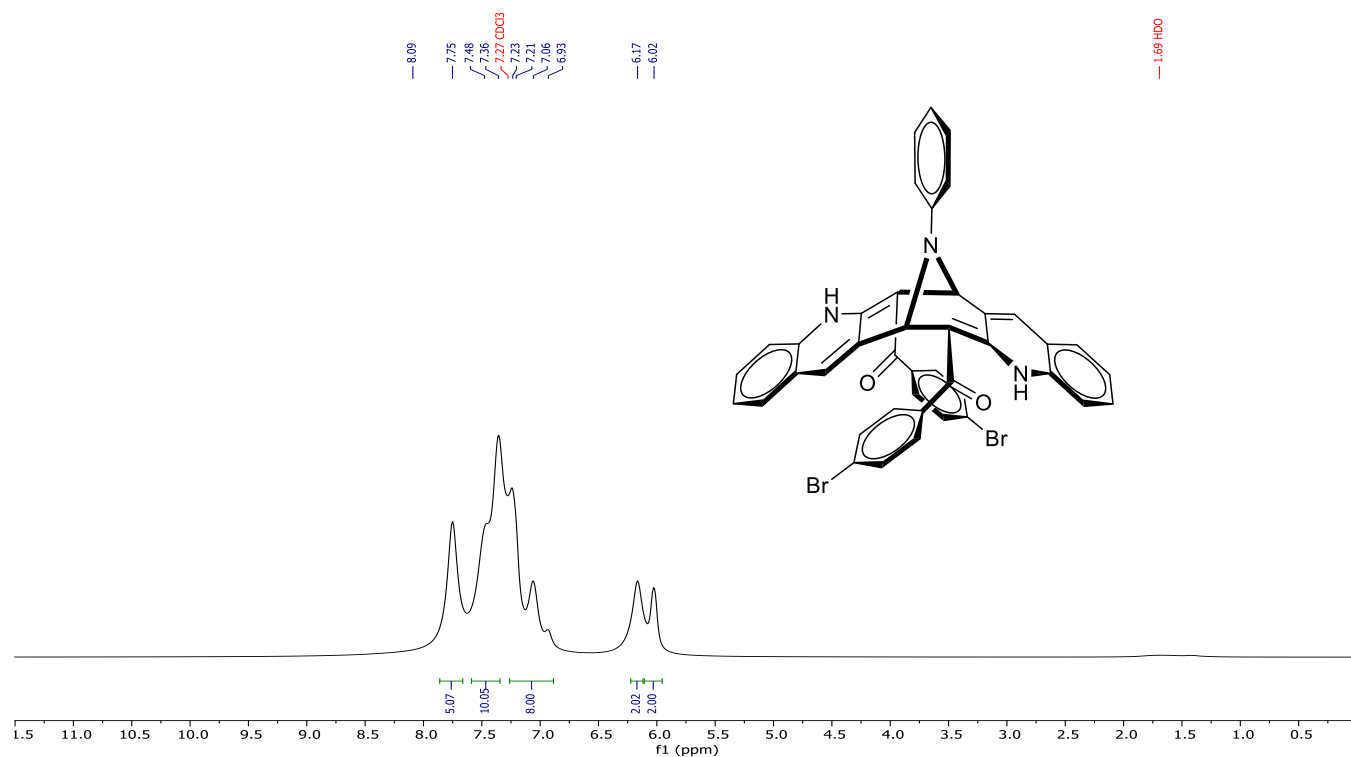

Figure S94:  $^1\text{H}$  NMR Compound **3af** (300 MHz,  $\text{CDCl}_3$ )

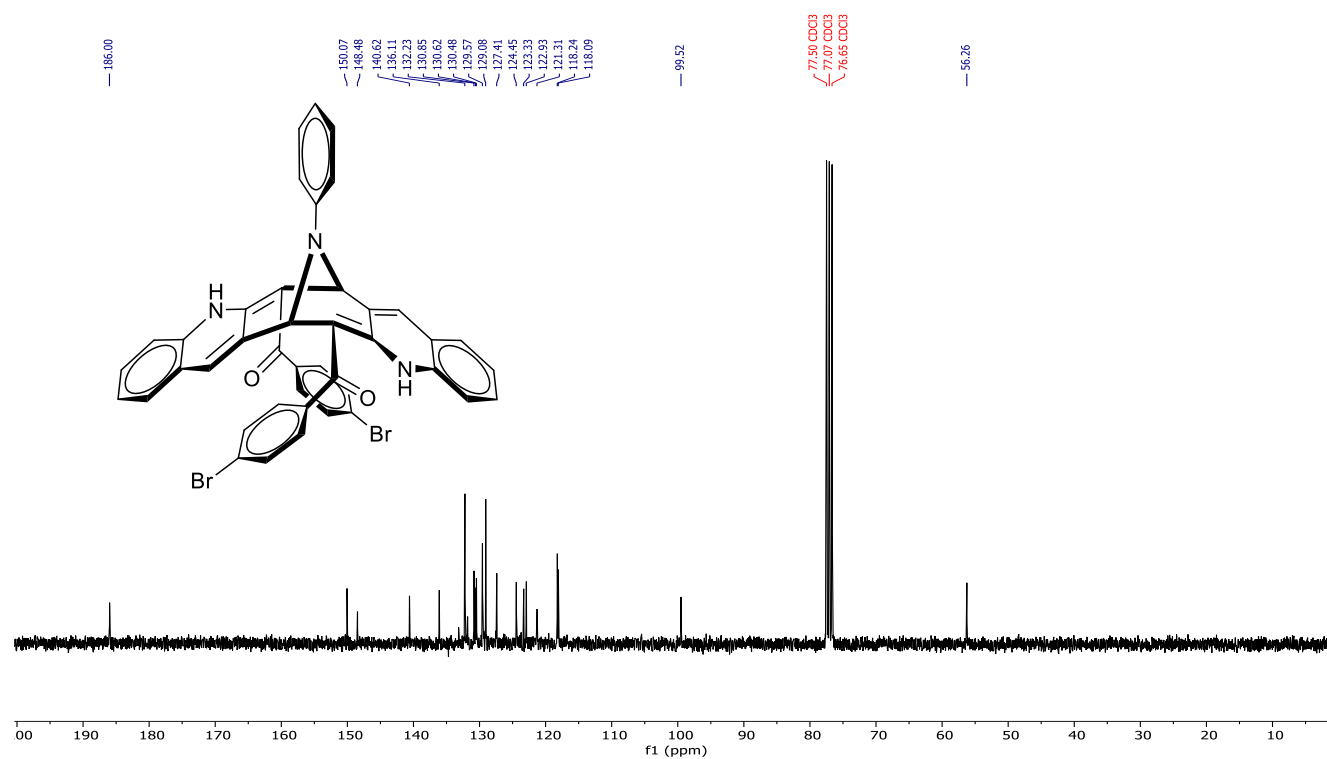

Figure S95:  $^{13}\text{C}\{^1\text{H}\}$  NMR Compound **3af** (75 MHz,  $\text{CDCl}_3$ )

## Supporting Information

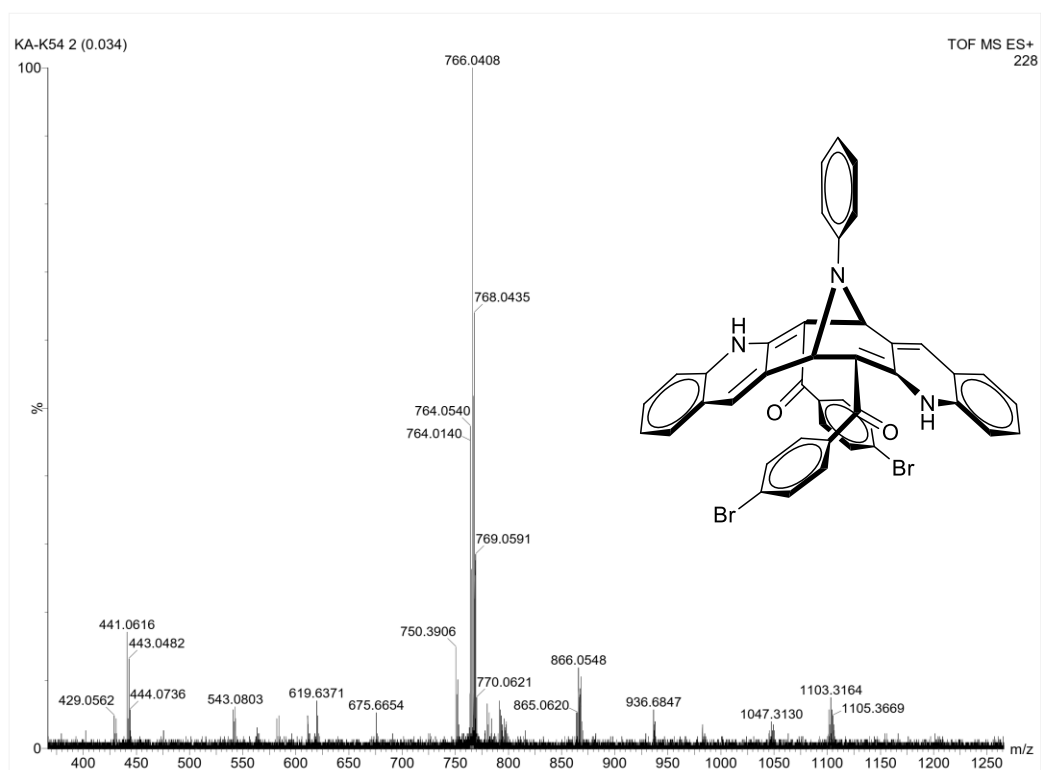

Figure S96: HRMS (ESI) of 3af



Supporting Information

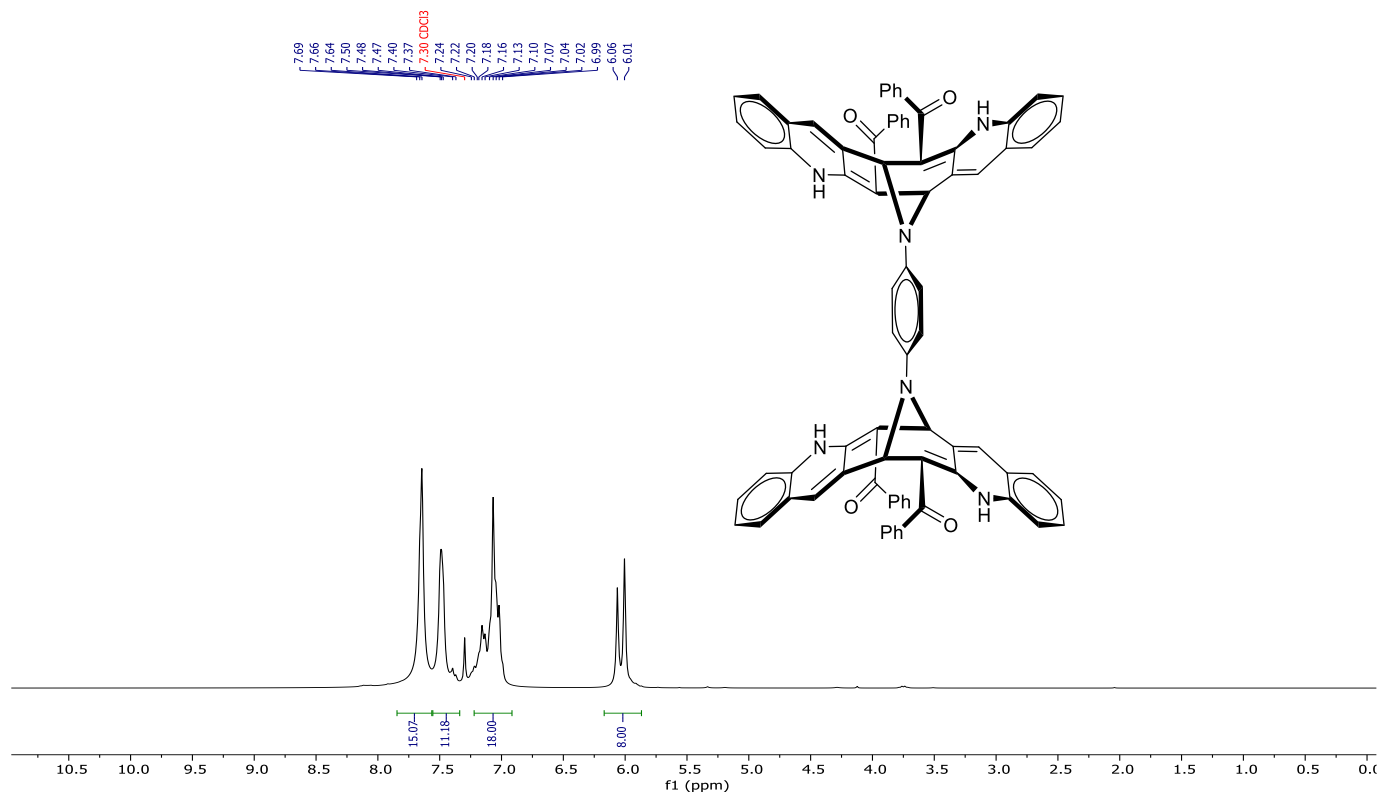

Figure S97:  $^1\text{H NMR}$  Compound **3ag** (300 MHz,  $\text{CDCl}_3$ )

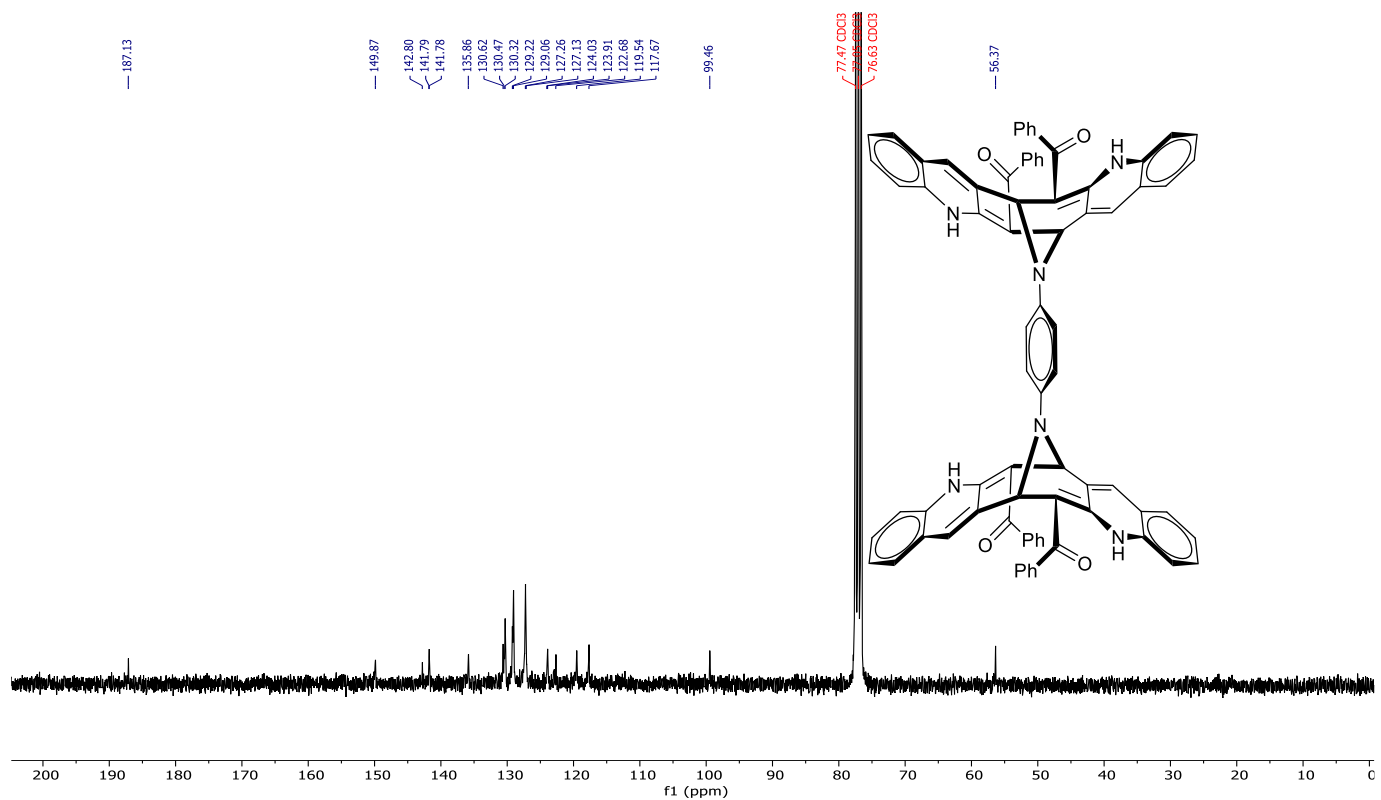

Figure S98:  $^{13}\text{C}\{^1\text{H}\}$  NMR Compound **3ag** (75 MHz,  $\text{CDCl}_3$ )

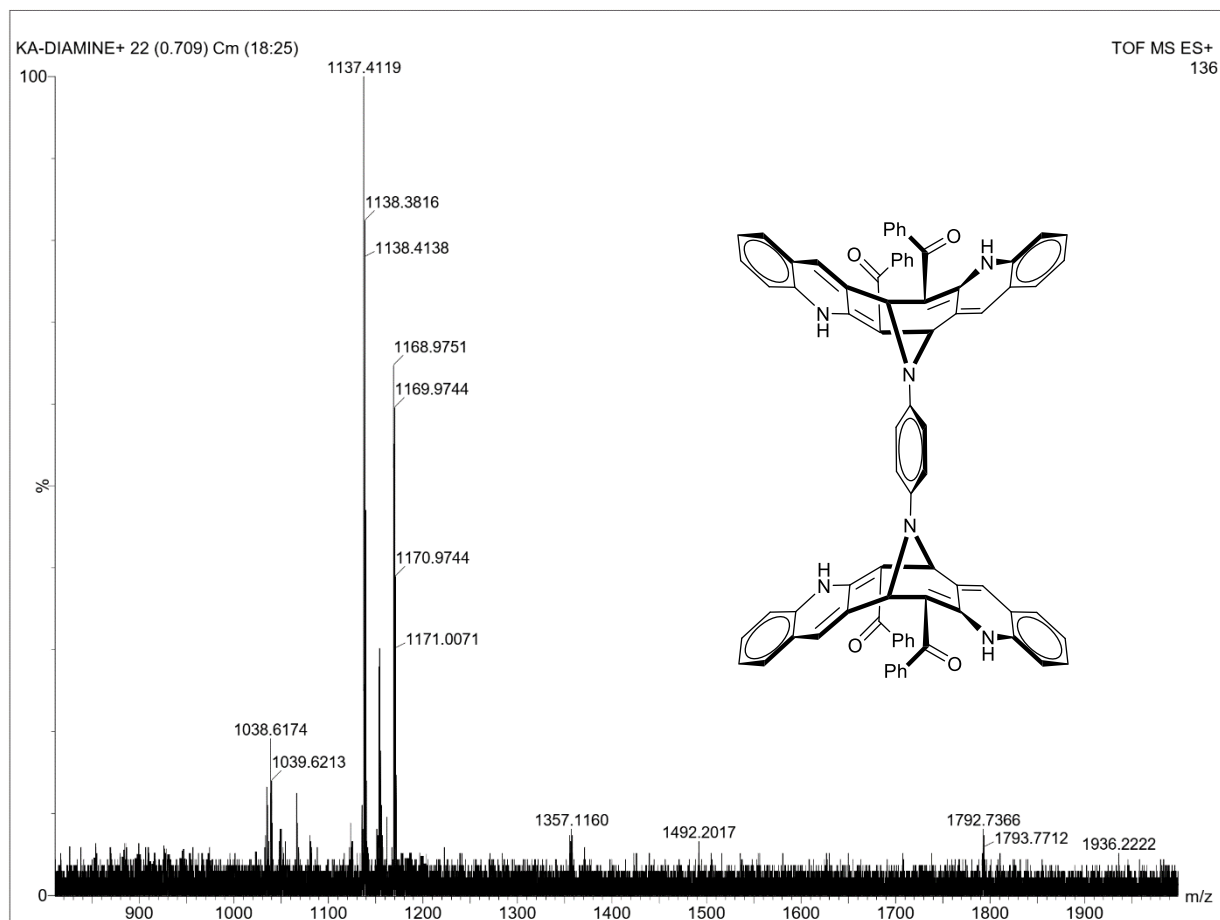Figure S99: HRMS (ESI) of **3ag**

Supporting Information

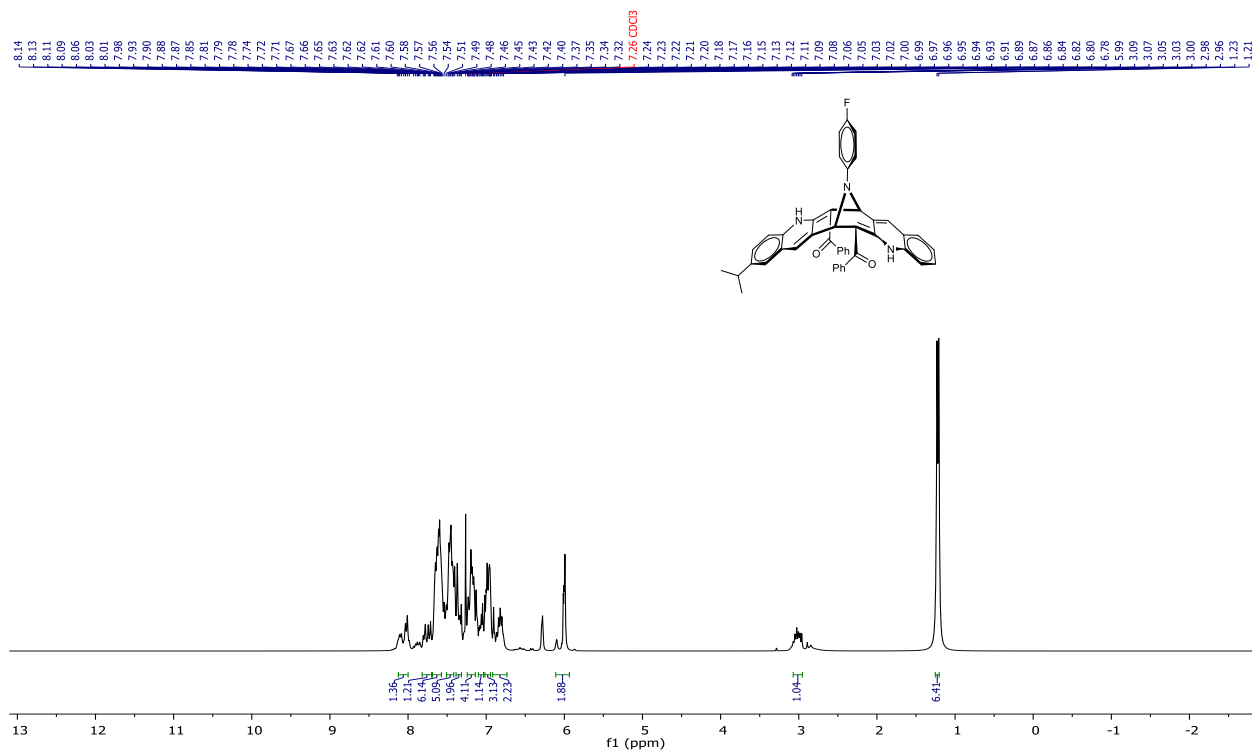

Figure S100:  $^1\text{H NMR}$  Compound 3ah (300 MHz,  $\text{CDCl}_3$ )

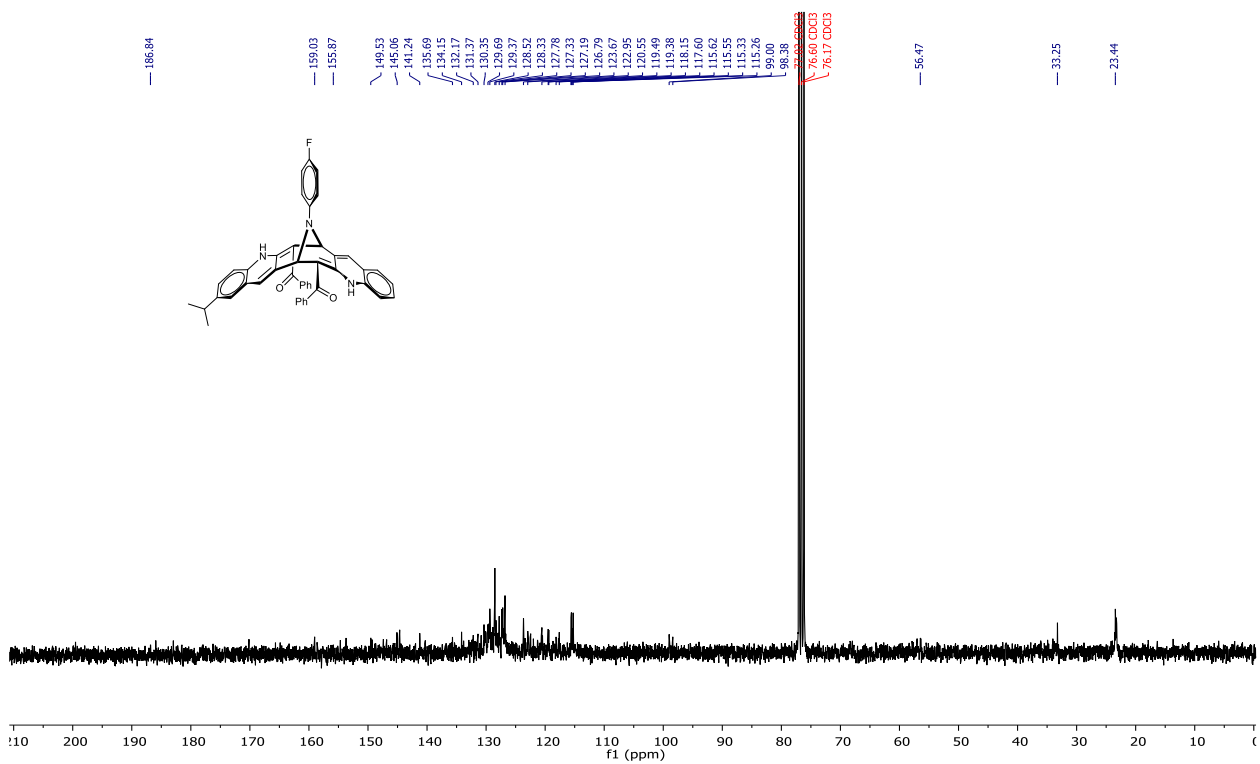

Figure S101:  $^{13}\text{C}\{^1\text{H}\}$  NMR Compound 3ah (75 MHz,  $\text{CDCl}_3$ )

# Supporting Information

07/22/2023 02:05 طاب

Chromatogram D:\RIGOL HPLC Data\1402\Nayebzadeh\QC-02123.0000.PRM

Page 1 of 1



**Clarity - Chromatography SW**

DataApex

www.dataapex.com

**Chromatogram Info:**

|           |                                                         |               |                           |
|-----------|---------------------------------------------------------|---------------|---------------------------|
| File Name | : D:\RIGOL HPLC Data\1402\Nayebzadeh\QC-02123.0000.PRM  | File Created  | : 07/15/2023 04:44:55 طاب |
| Origin    | : Acquired, Acquisition started 07/15/2023 03:26:33 طاب | Acquired Date | : 07/15/2023 04:44:55 طاب |
| Project   | : D:\RIGOL HPLC Data\Projects\sohbatl.PRJ               | By            | : GLA                     |

**Sample Info:**

|                  |                  |             |     |
|------------------|------------------|-------------|-----|
| Sample ID        | : QC-02123-2     | Amount      | : 0 |
| Sample           | : enol-min-04-24 | ISTD Amount | : 0 |
| Inj. Volume [mL] | : 0              | Dilution    | : 1 |

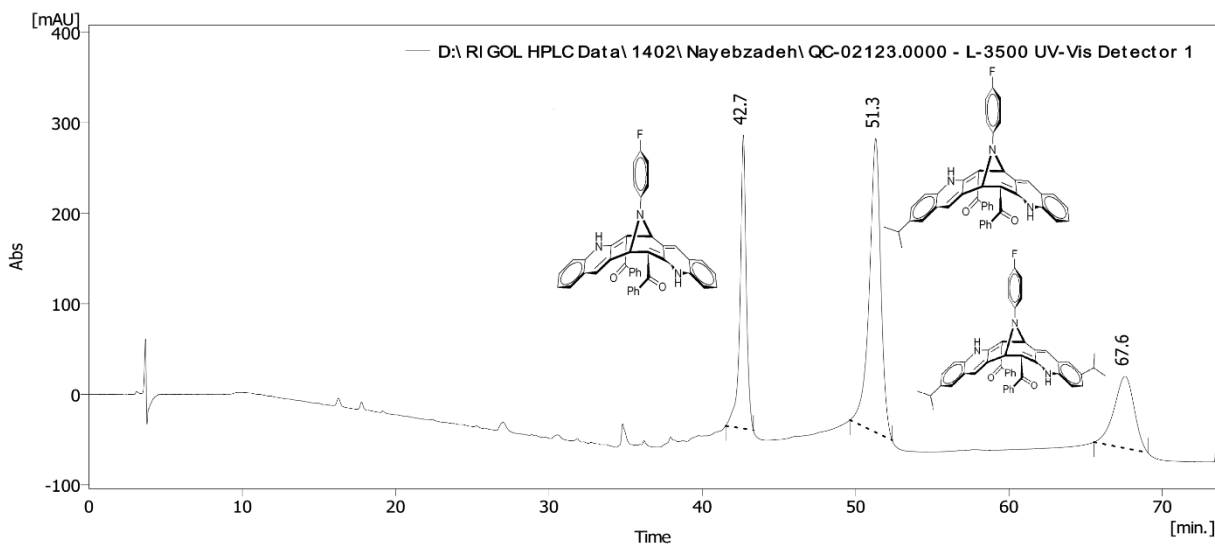

Result Table (Uncal - D:\RIGOL HPLC Data\1402\Nayebzadeh\QC-02123.0000 - L-3500 UV-Vis Detector 1)

|   | Reten. Time [min] | Area [mAU.s] | Height [mAU] | Area [%] | Height [%] | W05 [min] | Compound Name |
|---|-------------------|--------------|--------------|----------|------------|-----------|---------------|
| 1 | 42.677            | 9191.350     | 323.847      | 27.5     | 44.5       | 0.39      |               |
| 2 | 51.307            | 17010.090    | 324.535      | 50.9     | 44.6       | 0.76      |               |
| 3 | 67.563            | 7217.435     | 79.399       | 21.6     | 10.9       | 1.43      |               |
|   | Total             | 33418.876    | 727.781      | 100.0    | 100.0      |           |               |

Figure S102: Analytical HPLC of crude compound (3ah)

Supporting Information

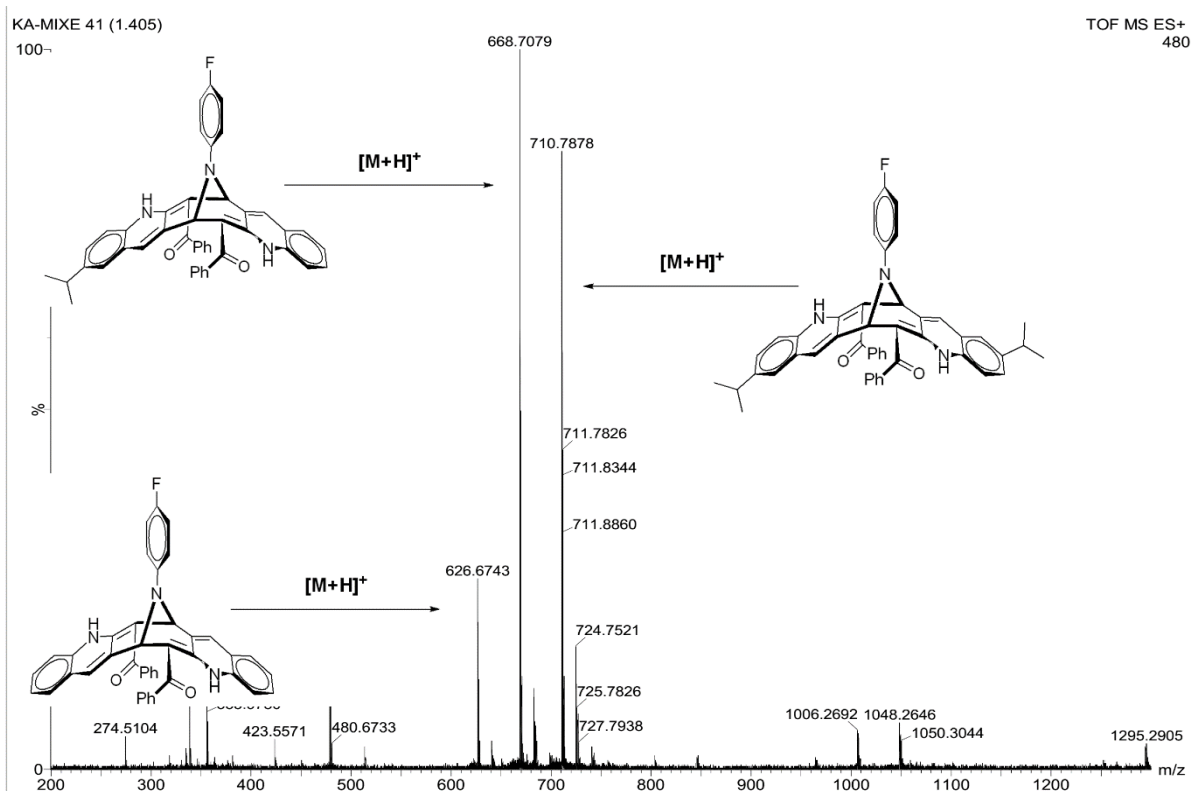

Figure S103: Mass of crude compound (3ah)

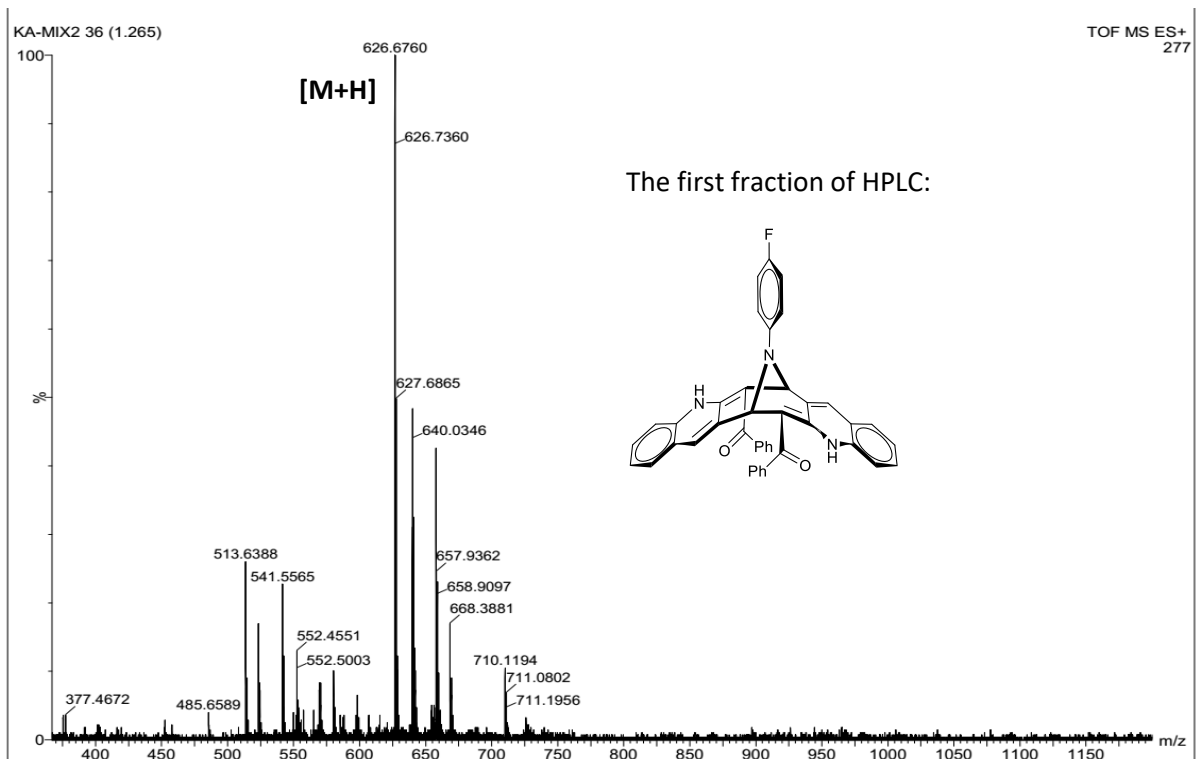

Supporting Information

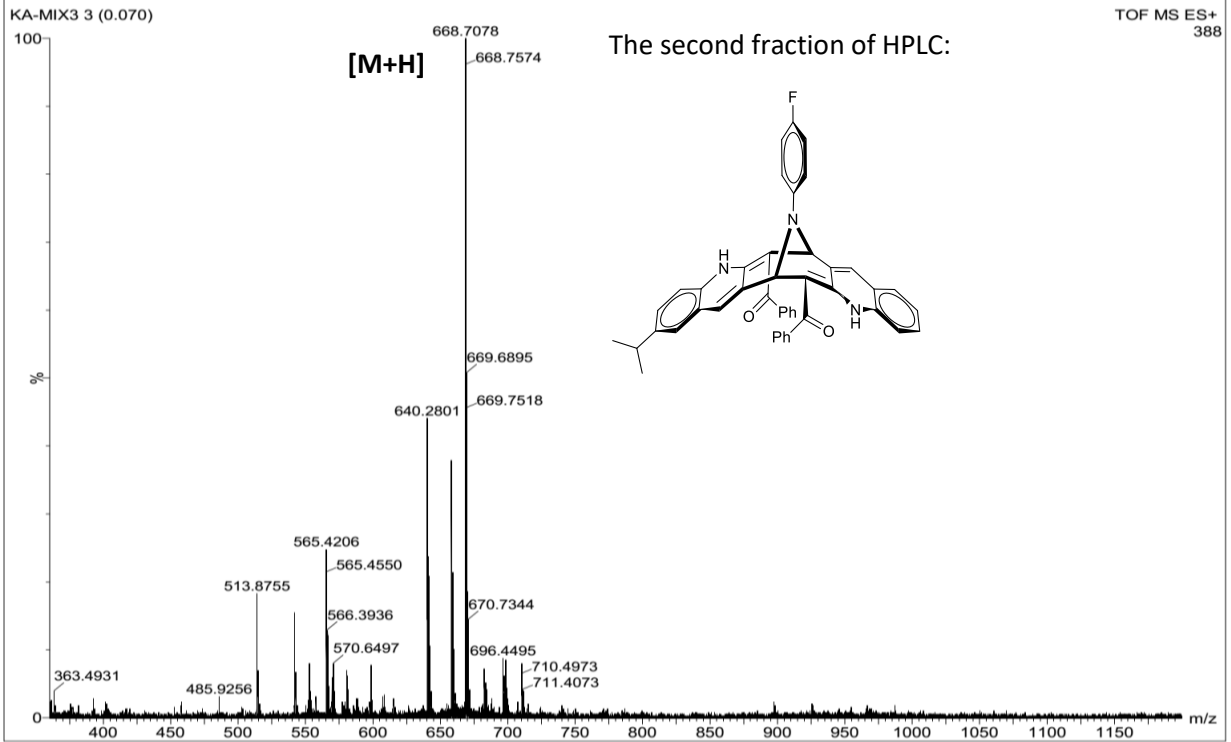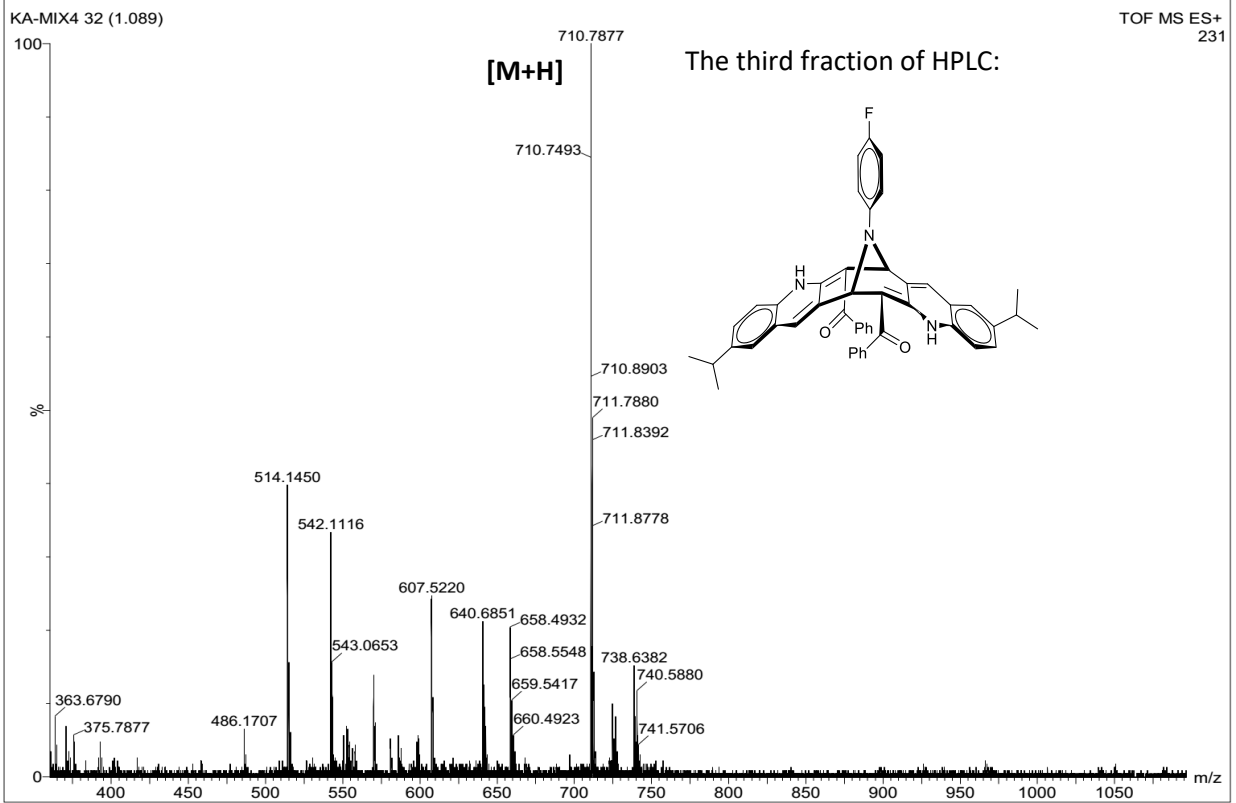

## Supporting Information

Chemie : Saeed Balalaie  
 Probe : KA4000  
 Dateinamen : **3e**  
 Operateur : F. Rominger  
 Gerät : Bruker APEX-II Quazar area detector

Table S1: Crystal data and structure refinement for **3e**.

|                                   |                                                               |                     |
|-----------------------------------|---------------------------------------------------------------|---------------------|
| Identification code               | 3e                                                            |                     |
| Empirical formula                 | C <sub>50</sub> H <sub>33</sub> N <sub>3</sub> O <sub>2</sub> |                     |
| Formula weight                    | 707.79                                                        |                     |
| Temperature                       | 200(2) K                                                      |                     |
| Wavelength                        | 0.71073 Å                                                     |                     |
| Crystal system                    | trigonal                                                      |                     |
| Space group                       | R $\bar{3}$                                                   |                     |
| Z                                 | 18                                                            |                     |
| Unit cell dimensions              | a = 39.4459(15) Å                                             | $\alpha = 90$ deg.  |
|                                   | b = 39.4459(15) Å                                             | $\beta = 90$ deg.   |
|                                   | c = 12.5093(8) Å                                              | $\gamma = 120$ deg. |
| Volume                            | 16856.5(17) Å <sup>3</sup>                                    |                     |
| Density (calculated)              | 1.25 g/cm <sup>3</sup>                                        |                     |
| Absorption coefficient            | 0.08 mm <sup>-1</sup>                                         |                     |
| Crystal shape                     | hexagonal                                                     |                     |
| Crystal size                      | 0.157 x 0.082 x 0.066 mm <sup>3</sup>                         |                     |
| Crystal colour                    | yellow                                                        |                     |
| Theta range for data collection   | 2.0 to 24.1 deg.                                              |                     |
| Index ranges                      | -45 ≤ h ≤ 39, -38 ≤ k ≤ 45, -14 ≤ l ≤ 14                      |                     |
| Reflections collected             | 34031                                                         |                     |
| Independent reflections           | 5968 (R(int) = 0.0717)                                        |                     |
| Observed reflections              | 3507 (I > 2σ(I))                                              |                     |
| Absorption correction             | Semi-empirical from equivalents                               |                     |
| Max. and min. transmission        | 0.96 and 0.93                                                 |                     |
| Refinement method                 | Full-matrix least-squares on F <sup>2</sup>                   |                     |
| Data/restraints/parameters        | 5968 / 0 / 502                                                |                     |
| Goodness-of-fit on F <sup>2</sup> | 1.04                                                          |                     |
| Final R indices (I > 2σ(I))       | R1 = 0.053, wR2 = 0.113                                       |                     |
| Largest diff. peak and hole       | 0.22 and -0.20 eÅ <sup>-3</sup>                               |                     |

Table S2: Atomic coordinates and equivalent isotropic displacement parameters (Å<sup>2</sup>) for 3e. U<sub>eq</sub> is defined as one third of the trace of the orthogonalized U<sub>ij</sub> tensor.

| Atom | x         | y         | z         | U <sub>eq</sub> |
|------|-----------|-----------|-----------|-----------------|
| N1   | 0.5637(1) | 0.7394(1) | 0.6842(2) | 0.0323(6)       |
| C11  | 0.5707(1) | 0.7745(1) | 0.7427(2) | 0.0332(7)       |
| H11  | 0.5766    | 0.7717    | 0.8189    | 0.040           |
| C12  | 0.5360(1) | 0.7817(1) | 0.7404(2) | 0.0331(7)       |
| C13  | 0.5096(1) | 0.7654(1) | 0.6554(2) | 0.0333(7)       |
| N14  | 0.4776(1) | 0.7699(1) | 0.6496(2) | 0.0365(6)       |
| H14  | 0.4780(8) | 0.7868(8) | 0.706(2)  | 0.044           |
| C15  | 0.4493(1) | 0.7534(1) | 0.5720(2) | 0.0384(7)       |
| C16  | 0.4178(1) | 0.7603(1) | 0.5719(3) | 0.0520(9)       |
| H16  | 0.4157    | 0.7761    | 0.6260    | 0.062           |
| C17  | 0.3901(1) | 0.7442(1) | 0.4935(3) | 0.0668(11)      |
| H17  | 0.3688    | 0.7491    | 0.4930    | 0.080           |

## Supporting Information

|     |           |           |           |            |
|-----|-----------|-----------|-----------|------------|
| C18 | 0.3928(1) | 0.7209(1) | 0.4144(3) | 0.0676(11) |
| H18 | 0.3734    | 0.7100    | 0.3602    | 0.081      |
| C19 | 0.4234(1) | 0.7136(1) | 0.4142(3) | 0.0523(9)  |
| H19 | 0.4250    | 0.6976    | 0.3600    | 0.063      |
| C20 | 0.4523(1) | 0.7297(1) | 0.4941(2) | 0.0390(8)  |
| C21 | 0.4854(1) | 0.7240(1) | 0.4986(2) | 0.0347(7)  |
| H21 | 0.4876    | 0.7073    | 0.4480    | 0.042      |
| C22 | 0.5137(1) | 0.7420(1) | 0.5731(2) | 0.0315(7)  |
| C23 | 0.5513(1) | 0.7403(1) | 0.5733(2) | 0.0331(7)  |
| H23 | 0.5465    | 0.7158    | 0.5360    | 0.040      |
| C24 | 0.5843(1) | 0.7755(1) | 0.5154(2) | 0.0324(7)  |
| C25 | 0.6110(1) | 0.8073(1) | 0.5797(2) | 0.0325(7)  |
| N26 | 0.6420(1) | 0.8390(1) | 0.5341(2) | 0.0382(6)  |
| H26 | 0.6425(8) | 0.8369(8) | 0.464(2)  | 0.046      |
| C27 | 0.6688(1) | 0.8716(1) | 0.5902(2) | 0.0370(7)  |
| C28 | 0.6991(1) | 0.9035(1) | 0.5366(3) | 0.0465(8)  |
| H28 | 0.7014    | 0.9031    | 0.4611    | 0.056      |
| C29 | 0.7253(1) | 0.9354(1) | 0.5945(3) | 0.0539(9)  |
| H29 | 0.7458    | 0.9573    | 0.5586    | 0.065      |
| C30 | 0.7224(1) | 0.9363(1) | 0.7048(3) | 0.0497(9)  |
| H30 | 0.7408    | 0.9587    | 0.7437    | 0.060      |
| C31 | 0.6932(1) | 0.9052(1) | 0.7578(3) | 0.0426(8)  |
| H31 | 0.6916    | 0.9059    | 0.8335    | 0.051      |
| C32 | 0.6655(1) | 0.8720(1) | 0.7011(2) | 0.0367(7)  |
| C33 | 0.6338(1) | 0.8388(1) | 0.7512(2) | 0.0364(7)  |
| H33 | 0.6316    | 0.8381    | 0.8269    | 0.044      |
| C34 | 0.6067(1) | 0.8080(1) | 0.6932(2) | 0.0321(7)  |
| C40 | 0.5315(1) | 0.8050(1) | 0.8172(2) | 0.0389(7)  |
| O40 | 0.5044(1) | 0.8137(1) | 0.8140(2) | 0.0533(6)  |
| C41 | 0.5595(1) | 0.8224(1) | 0.9087(2) | 0.0393(8)  |
| C42 | 0.5629(1) | 0.7993(1) | 0.9862(2) | 0.0482(8)  |
| H42 | 0.5474    | 0.7716    | 0.9815    | 0.058      |
| C43 | 0.5887(1) | 0.8162(1) | 1.0706(3) | 0.0665(11) |
| H43 | 0.5906    | 0.8001    | 1.1238    | 0.080      |
| C44 | 0.6113(1) | 0.8559(2) | 1.0777(3) | 0.0839(13) |
| H44 | 0.6293    | 0.8674    | 1.1351    | 0.101      |
| C45 | 0.6082(1) | 0.8795(1) | 1.0018(4) | 0.0805(12) |
| H45 | 0.6238    | 0.9071    | 1.0072    | 0.097      |
| C46 | 0.5822(1) | 0.8628(1) | 0.9174(3) | 0.0583(10) |
| H46 | 0.5800    | 0.8791    | 0.8653    | 0.070      |
| C50 | 0.5866(1) | 0.7780(1) | 0.4035(2) | 0.0398(8)  |
| O50 | 0.6139(1) | 0.8072(1) | 0.3529(2) | 0.0547(6)  |
| C51 | 0.5554(1) | 0.7475(1) | 0.3329(2) | 0.0441(8)  |
| C52 | 0.5484(1) | 0.7097(1) | 0.3253(2) | 0.0501(9)  |
| H52 | 0.5634    | 0.7017    | 0.3664    | 0.060      |
| C53 | 0.5191(1) | 0.6830(1) | 0.2570(3) | 0.0653(11) |
| H53 | 0.5145    | 0.6570    | 0.2517    | 0.078      |
| C54 | 0.4969(1) | 0.6940(1) | 0.1976(3) | 0.0726(12) |
| H54 | 0.4768    | 0.6756    | 0.1521    | 0.087      |
| C55 | 0.5039(1) | 0.7318(1) | 0.2045(3) | 0.0740(11) |
| H55 | 0.4887    | 0.7397    | 0.1634    | 0.089      |
| C56 | 0.5331(1) | 0.7584(1) | 0.2716(3) | 0.0568(9)  |
| H56 | 0.5380    | 0.7845    | 0.2756    | 0.068      |
| C61 | 0.5453(1) | 0.7029(1) | 0.7384(2) | 0.0333(7)  |
| C62 | 0.5557(1) | 0.6750(1) | 0.7078(2) | 0.0365(7)  |
| C63 | 0.5396(1) | 0.6396(1) | 0.7634(3) | 0.0476(8)  |
| H63 | 0.5458    | 0.6203    | 0.7417    | 0.057      |
| C64 | 0.5148(1) | 0.6320(1) | 0.8489(3) | 0.0518(9)  |
| H64 | 0.5042    | 0.6078    | 0.8861    | 0.062      |
| C65 | 0.5056(1) | 0.6600(1) | 0.8798(2) | 0.0484(8)  |
| H65 | 0.4891    | 0.6552    | 0.9397    | 0.058      |
| C66 | 0.5203(1) | 0.6949(1) | 0.8245(2) | 0.0392(7)  |
| H66 | 0.5132    | 0.7136    | 0.8459    | 0.047      |



## Supporting Information

|     |           |           |           |            |
|-----|-----------|-----------|-----------|------------|
| C67 | 0.5842(1) | 0.6839(1) | 0.6259(3) | 0.0431(8)  |
| C68 | 0.6083(1) | 0.6914(1) | 0.5583(3) | 0.0479(8)  |
| C71 | 0.6374(1) | 0.7009(1) | 0.4769(3) | 0.0513(9)  |
| C72 | 0.6496(1) | 0.6747(1) | 0.4503(3) | 0.0841(13) |
| H72 | 0.6383    | 0.6498    | 0.4843    | 0.101      |
| C73 | 0.6787(2) | 0.6847(2) | 0.3736(4) | 0.1064(17) |
| H73 | 0.6876    | 0.6670    | 0.3572    | 0.128      |
| C74 | 0.6943(1) | 0.7196(2) | 0.3219(4) | 0.0918(14) |
| H74 | 0.7139    | 0.7261    | 0.2691    | 0.110      |
| C75 | 0.6820(1) | 0.7454(1) | 0.3459(3) | 0.0697(11) |
| H75 | 0.6932    | 0.7699    | 0.3103    | 0.084      |
| C76 | 0.6532(1) | 0.7359(1) | 0.4223(3) | 0.0583(10) |
| H76 | 0.6441    | 0.7537    | 0.4372    | 0.070      |

Table S3: Hydrogen coordinates and isotropic displacement parameters ( $\text{\AA}^2$ ) for 3e.

| Atom | x         | y         | z        | $U_{eq}$ |
|------|-----------|-----------|----------|----------|
| H11  | 0.5766    | 0.7717    | 0.8189   | 0.040    |
| H14  | 0.4780(8) | 0.7868(8) | 0.706(2) | 0.044    |
| H16  | 0.4157    | 0.7761    | 0.6260   | 0.062    |
| H17  | 0.3688    | 0.7491    | 0.4930   | 0.080    |
| H18  | 0.3734    | 0.7100    | 0.3602   | 0.081    |
| H19  | 0.4250    | 0.6976    | 0.3600   | 0.063    |
| H21  | 0.4876    | 0.7073    | 0.4480   | 0.042    |
| H23  | 0.5465    | 0.7158    | 0.5360   | 0.040    |
| H26  | 0.6425(8) | 0.8369(8) | 0.464(2) | 0.046    |
| H28  | 0.7014    | 0.9031    | 0.4611   | 0.056    |
| H29  | 0.7458    | 0.9573    | 0.5586   | 0.065    |
| H30  | 0.7408    | 0.9587    | 0.7437   | 0.060    |
| H31  | 0.6916    | 0.9059    | 0.8335   | 0.051    |
| H33  | 0.6316    | 0.8381    | 0.8269   | 0.044    |
| H42  | 0.5474    | 0.7716    | 0.9815   | 0.058    |
| H43  | 0.5906    | 0.8001    | 1.1238   | 0.080    |
| H44  | 0.6293    | 0.8674    | 1.1351   | 0.101    |
| H45  | 0.6238    | 0.9071    | 1.0072   | 0.097    |
| H46  | 0.5800    | 0.8791    | 0.8653   | 0.070    |
| H52  | 0.5634    | 0.7017    | 0.3664   | 0.060    |
| H53  | 0.5145    | 0.6570    | 0.2517   | 0.078    |
| H54  | 0.4768    | 0.6756    | 0.1521   | 0.087    |
| H55  | 0.4887    | 0.7397    | 0.1634   | 0.089    |
| H56  | 0.5380    | 0.7845    | 0.2756   | 0.068    |
| H63  | 0.5458    | 0.6203    | 0.7417   | 0.057    |
| H64  | 0.5042    | 0.6078    | 0.8861   | 0.062    |
| H65  | 0.4891    | 0.6552    | 0.9397   | 0.058    |
| H66  | 0.5132    | 0.7136    | 0.8459   | 0.047    |
| H72  | 0.6383    | 0.6498    | 0.4843   | 0.101    |
| H73  | 0.6876    | 0.6670    | 0.3572   | 0.128    |
| H74  | 0.7139    | 0.7261    | 0.2691   | 0.110    |
| H75  | 0.6932    | 0.7699    | 0.3103   | 0.084    |
| H76  | 0.6441    | 0.7537    | 0.4372   | 0.070    |

Table S4: Anisotropic displacement parameters ( $\text{\AA}^2$ ) for 3e. The anisotropic displacement factor exponent takes the form:  $-2 \pi^2 (h^2 a^{*2} U_{11} + \dots + 2 h k a^* b^* U_{12})$

## Supporting Information

| Atom | U <sub>11</sub> | U <sub>22</sub> | U <sub>33</sub> | U <sub>23</sub> | U <sub>13</sub> | U <sub>12</sub> |
|------|-----------------|-----------------|-----------------|-----------------|-----------------|-----------------|
| N1   | 0.0347(14)      | 0.0294(14)      | 0.0350(14)      | -0.0001(11)     | 0.0003(11)      | 0.0176(12)      |
| C11  | 0.0374(18)      | 0.0325(18)      | 0.0328(16)      | -0.0021(13)     | -0.0025(13)     | 0.0198(15)      |
| C12  | 0.0335(18)      | 0.0318(17)      | 0.0375(17)      | 0.0009(13)      | 0.0030(14)      | 0.0190(15)      |
| C13  | 0.0297(17)      | 0.0286(17)      | 0.0420(18)      | 0.0056(13)      | 0.0031(14)      | 0.0149(15)      |
| N14  | 0.0332(15)      | 0.0341(15)      | 0.0448(16)      | -0.0044(12)     | -0.0034(12)     | 0.0188(13)      |
| C15  | 0.0295(18)      | 0.0299(18)      | 0.052(2)        | 0.0021(15)      | 0.0011(15)      | 0.0123(15)      |
| C16  | 0.036(2)        | 0.050(2)        | 0.073(2)        | -0.0114(18)     | -0.0094(17)     | 0.0240(18)      |
| C17  | 0.046(2)        | 0.066(3)        | 0.097(3)        | -0.022(2)       | -0.020(2)       | 0.035(2)        |
| C18  | 0.046(2)        | 0.074(3)        | 0.084(3)        | -0.021(2)       | -0.026(2)       | 0.032(2)        |
| C19  | 0.039(2)        | 0.050(2)        | 0.063(2)        | -0.0113(17)     | -0.0113(17)     | 0.0183(18)      |
| C20  | 0.0334(19)      | 0.0333(18)      | 0.0473(19)      | 0.0019(14)      | -0.0004(14)     | 0.0144(15)      |
| C21  | 0.0346(18)      | 0.0299(17)      | 0.0370(17)      | 0.0012(13)      | 0.0038(14)      | 0.0144(15)      |
| C22  | 0.0302(17)      | 0.0267(16)      | 0.0372(17)      | 0.0025(13)      | 0.0018(13)      | 0.0140(14)      |
| C23  | 0.0323(17)      | 0.0310(17)      | 0.0356(16)      | -0.0012(13)     | -0.0024(13)     | 0.0155(14)      |
| C24  | 0.0320(17)      | 0.0345(18)      | 0.0327(17)      | 0.0019(13)      | 0.0014(13)      | 0.0182(15)      |
| C25  | 0.0292(17)      | 0.0337(18)      | 0.0392(17)      | 0.0047(14)      | 0.0033(14)      | 0.0191(15)      |
| N26  | 0.0354(15)      | 0.0395(16)      | 0.0358(14)      | 0.0003(13)      | 0.0010(13)      | 0.0158(14)      |
| C27  | 0.0322(18)      | 0.0338(19)      | 0.0463(19)      | -0.0018(15)     | -0.0064(15)     | 0.0174(16)      |
| C28  | 0.039(2)        | 0.042(2)        | 0.049(2)        | 0.0048(16)      | 0.0020(16)      | 0.0132(17)      |
| C29  | 0.038(2)        | 0.041(2)        | 0.069(3)        | 0.0047(18)      | -0.0036(18)     | 0.0092(17)      |
| C30  | 0.041(2)        | 0.039(2)        | 0.062(2)        | -0.0010(17)     | -0.0123(17)     | 0.0145(18)      |
| C31  | 0.0374(19)      | 0.041(2)        | 0.0486(19)      | 0.0000(16)      | -0.0085(15)     | 0.0193(17)      |
| C32  | 0.0299(18)      | 0.0338(18)      | 0.0471(19)      | 0.0016(15)      | -0.0054(14)     | 0.0164(16)      |
| C33  | 0.0384(19)      | 0.0410(19)      | 0.0369(17)      | -0.0004(15)     | -0.0035(14)     | 0.0251(17)      |
| C34  | 0.0306(17)      | 0.0313(17)      | 0.0410(17)      | -0.0003(14)     | -0.0020(14)     | 0.0204(15)      |
| C40  | 0.0368(19)      | 0.0399(19)      | 0.0429(18)      | 0.0000(15)      | -0.0007(14)     | 0.0214(16)      |
| O40  | 0.0540(15)      | 0.0640(16)      | 0.0605(15)      | -0.0172(12)     | -0.0116(11)     | 0.0435(13)      |
| C41  | 0.0406(19)      | 0.043(2)        | 0.0405(18)      | -0.0053(15)     | -0.0001(14)     | 0.0260(17)      |
| C42  | 0.056(2)        | 0.054(2)        | 0.045(2)        | 0.0002(17)      | 0.0029(17)      | 0.0347(19)      |
| C43  | 0.080(3)        | 0.093(3)        | 0.048(2)        | -0.004(2)       | -0.008(2)       | 0.060(3)        |
| C44  | 0.086(3)        | 0.099(4)        | 0.078(3)        | -0.038(3)       | -0.038(2)       | 0.055(3)        |
| C45  | 0.079(3)        | 0.060(3)        | 0.095(3)        | -0.031(2)       | -0.030(3)       | 0.029(2)        |
| C46  | 0.071(3)        | 0.048(2)        | 0.060(2)        | -0.0068(18)     | -0.0111(19)     | 0.033(2)        |
| C50  | 0.0378(19)      | 0.0348(19)      | 0.046(2)        | 0.0027(15)      | 0.0014(15)      | 0.0177(16)      |
| O50  | 0.0544(15)      | 0.0499(14)      | 0.0429(13)      | 0.0035(11)      | 0.0042(11)      | 0.0133(12)      |
| C51  | 0.042(2)        | 0.048(2)        | 0.0354(18)      | 0.0015(15)      | 0.0045(15)      | 0.0168(17)      |
| C52  | 0.053(2)        | 0.044(2)        | 0.046(2)        | -0.0044(16)     | 0.0029(16)      | 0.0182(18)      |
| C53  | 0.068(3)        | 0.054(2)        | 0.052(2)        | -0.0066(19)     | 0.009(2)        | 0.015(2)        |
| C54  | 0.063(3)        | 0.074(3)        | 0.053(2)        | -0.005(2)       | -0.009(2)       | 0.014(2)        |
| C55  | 0.068(3)        | 0.083(3)        | 0.055(2)        | 0.005(2)        | -0.009(2)       | 0.026(2)        |
| C56  | 0.056(2)        | 0.059(2)        | 0.045(2)        | 0.0047(17)      | -0.0030(18)     | 0.021(2)        |
| C61  | 0.0279(17)      | 0.0281(17)      | 0.0405(17)      | -0.0006(14)     | -0.0057(13)     | 0.0113(14)      |
| C62  | 0.0403(19)      | 0.0334(18)      | 0.0373(17)      | -0.0049(14)     | -0.0077(14)     | 0.0196(16)      |
| C63  | 0.058(2)        | 0.0307(19)      | 0.052(2)        | -0.0021(16)     | -0.0086(17)     | 0.0202(17)      |
| C64  | 0.052(2)        | 0.036(2)        | 0.053(2)        | 0.0073(16)      | -0.0092(18)     | 0.0118(18)      |
| C65  | 0.043(2)        | 0.042(2)        | 0.048(2)        | 0.0074(16)      | 0.0026(15)      | 0.0122(18)      |
| C66  | 0.0347(18)      | 0.0346(19)      | 0.0451(19)      | 0.0011(15)      | 0.0009(15)      | 0.0151(15)      |
| C67  | 0.051(2)        | 0.039(2)        | 0.048(2)        | -0.0057(15)     | -0.0045(17)     | 0.0292(18)      |
| C68  | 0.048(2)        | 0.047(2)        | 0.053(2)        | -0.0089(17)     | -0.0051(18)     | 0.0271(18)      |
| C71  | 0.055(2)        | 0.063(2)        | 0.048(2)        | -0.0062(18)     | -0.0044(17)     | 0.038(2)        |
| C72  | 0.114(4)        | 0.096(3)        | 0.078(3)        | 0.013(2)        | 0.027(3)        | 0.080(3)        |
| C73  | 0.144(5)        | 0.153(5)        | 0.087(3)        | 0.019(3)        | 0.040(3)        | 0.124(4)        |
| C74  | 0.092(3)        | 0.138(4)        | 0.076(3)        | 0.018(3)        | 0.026(3)        | 0.081(4)        |
| C75  | 0.053(2)        | 0.090(3)        | 0.072(3)        | 0.007(2)        | 0.003(2)        | 0.040(2)        |
| C76  | 0.042(2)        | 0.069(3)        | 0.070(2)        | -0.004(2)       | -0.0010(18)     | 0.033(2)        |

Table S5: Bond lengths (Å) and angles (deg) for 3e.

## Supporting Information

|         |          |             |           |
|---------|----------|-------------|-----------|
| N1-C61  | 1.419(3) | C51-C56     | 1.387(4)  |
| N1-C11  | 1.465(3) | C52-C53     | 1.398(4)  |
| N1-C23  | 1.478(3) | C52-H52     | 0.9500    |
| C11-C34 | 1.508(4) | C53-C54     | 1.372(5)  |
| C11-C12 | 1.531(4) | C53-H53     | 0.9500    |
| C11-H11 | 1.0000   | C54-C55     | 1.378(5)  |
| C12-C13 | 1.400(4) | C54-H54     | 0.9500    |
| C12-C40 | 1.402(4) | C55-C56     | 1.388(5)  |
| C13-N14 | 1.362(3) | C55-H55     | 0.9500    |
| C13-C22 | 1.444(4) | C56-H56     | 0.9500    |
| N14-C15 | 1.373(4) | C61-C66     | 1.386(4)  |
| N14-H14 | 0.97(3)  | C61-C62     | 1.406(4)  |
| C15-C20 | 1.396(4) | C62-C63     | 1.397(4)  |
| C15-C16 | 1.398(4) | C62-C67     | 1.430(4)  |
| C16-C17 | 1.367(4) | C63-C64     | 1.377(4)  |
| C16-H16 | 0.9500   | C63-H63     | 0.9500    |
| C17-C18 | 1.390(5) | C64-C65     | 1.377(4)  |
| C17-H17 | 0.9500   | C64-H64     | 0.9500    |
| C18-C19 | 1.373(4) | C65-C66     | 1.383(4)  |
| C18-H18 | 0.9500   | C65-H65     | 0.9500    |
| C19-C20 | 1.408(4) | C66-H66     | 0.9500    |
| C19-H19 | 0.9500   | C67-C68     | 1.192(4)  |
| C20-C21 | 1.432(4) | C68-C71     | 1.439(5)  |
| C21-C22 | 1.350(4) | C71-C76     | 1.377(4)  |
| C21-H21 | 0.9500   | C71-C72     | 1.384(5)  |
| C22-C23 | 1.520(4) | C72-C73     | 1.390(5)  |
| C23-C24 | 1.530(4) | C72-H72     | 0.9500    |
| C23-H23 | 1.0000   | C73-C74     | 1.358(6)  |
| C24-C50 | 1.403(4) | C73-H73     | 0.9500    |
| C24-C25 | 1.418(4) | C74-C75     | 1.361(5)  |
| C25-N26 | 1.360(3) | C74-H74     | 0.9500    |
| C25-C34 | 1.432(4) | C75-C76     | 1.386(5)  |
| N26-C27 | 1.380(4) | C75-H75     | 0.9500    |
| N26-H26 | 0.88(3)  | C76-H76     | 0.9500    |
| C27-C32 | 1.395(4) | C61-N1-C11  | 118.6(2)  |
| C27-C28 | 1.400(4) | C61-N1-C23  | 117.7(2)  |
| C28-C29 | 1.370(4) | C11-N1-C23  | 110.8(2)  |
| C28-H28 | 0.9500   | N1-C11-C34  | 105.9(2)  |
| C29-C30 | 1.386(4) | N1-C11-C12  | 113.8(2)  |
| C29-H29 | 0.9500   | C34-C11-C12 | 111.4(2)  |
| C30-C31 | 1.362(4) | N1-C11-H11  | 108.5     |
| C30-H30 | 0.9500   | C34-C11-H11 | 108.5     |
| C31-C32 | 1.407(4) | C12-C11-H11 | 108.5     |
| C31-H31 | 0.9500   | C13-C12-C40 | 120.9(3)  |
| C32-C33 | 1.427(4) | C13-C12-C11 | 117.2(2)  |
| C33-C34 | 1.357(4) | C40-C12-C11 | 121.9(3)  |
| C33-H33 | 0.9500   | N14-C13-C12 | 120.3(3)  |
| C40-O40 | 1.274(3) | N14-C13-C22 | 116.9(3)  |
| C40-C41 | 1.499(4) | C12-C13-C22 | 122.8(3)  |
| C41-C42 | 1.383(4) | C13-N14-C15 | 124.3(3)  |
| C41-C46 | 1.386(4) | C13-N14-H14 | 111.0(16) |
| C42-C43 | 1.384(4) | C15-N14-H14 | 124.8(16) |
| C42-H42 | 0.9500   | N14-C15-C20 | 119.3(3)  |
| C43-C44 | 1.365(5) | N14-C15-C16 | 120.0(3)  |
| C43-H43 | 0.9500   | C20-C15-C16 | 120.7(3)  |
| C44-C45 | 1.375(5) | C17-C16-C15 | 119.5(3)  |
| C44-H44 | 0.9500   | C17-C16-H16 | 120.2     |
| C45-C46 | 1.387(5) | C15-C16-H16 | 120.2     |
| C45-H45 | 0.9500   | C16-C17-C18 | 120.7(3)  |
| C46-H46 | 0.9500   | C16-C17-H17 | 119.7     |
| C50-O50 | 1.283(3) | C18-C17-H17 | 119.7     |
| C50-C51 | 1.504(4) | C19-C18-C17 | 120.3(3)  |
| C51-C52 | 1.377(4) | C19-C18-H18 | 119.8     |

## Supporting Information

|             |           |             |          |
|-------------|-----------|-------------|----------|
| C17-C18-H18 | 119.8     | C42-C43-H43 | 119.9    |
| C18-C19-C20 | 120.3(3)  | C43-C44-C45 | 120.2(4) |
| C18-C19-H19 | 119.9     | C43-C44-H44 | 119.9    |
| C20-C19-H19 | 119.9     | C45-C44-H44 | 119.9    |
| C15-C20-C19 | 118.5(3)  | C44-C45-C46 | 119.9(4) |
| C15-C20-C21 | 117.8(3)  | C44-C45-H45 | 120.1    |
| C19-C20-C21 | 123.7(3)  | C46-C45-H45 | 120.1    |
| C22-C21-C20 | 121.6(3)  | C41-C46-C45 | 120.4(3) |
| C22-C21-H21 | 119.2     | C41-C46-H46 | 119.8    |
| C20-C21-H21 | 119.2     | C45-C46-H46 | 119.8    |
| C21-C22-C13 | 120.1(3)  | O50-C50-C24 | 123.4(3) |
| C21-C22-C23 | 123.1(3)  | O50-C50-C51 | 114.4(3) |
| C13-C22-C23 | 116.8(2)  | C24-C50-C51 | 122.1(3) |
| N1-C23-C22  | 110.2(2)  | C52-C51-C56 | 118.9(3) |
| N1-C23-C24  | 108.9(2)  | C52-C51-C50 | 123.3(3) |
| C22-C23-C24 | 111.4(2)  | C56-C51-C50 | 117.8(3) |
| N1-C23-H23  | 108.8     | C51-C52-C53 | 120.0(3) |
| C22-C23-H23 | 108.8     | C51-C52-H52 | 120.0    |
| C24-C23-H23 | 108.8     | C53-C52-H52 | 120.0    |
| C50-C24-C25 | 120.7(3)  | C54-C53-C52 | 120.8(4) |
| C50-C24-C23 | 122.1(3)  | C54-C53-H53 | 119.6    |
| C25-C24-C23 | 117.0(2)  | C52-C53-H53 | 119.6    |
| N26-C25-C24 | 120.2(2)  | C53-C54-C55 | 119.5(4) |
| N26-C25-C34 | 117.3(3)  | C53-C54-H54 | 120.2    |
| C24-C25-C34 | 122.5(3)  | C55-C54-H54 | 120.2    |
| C25-N26-C27 | 124.0(3)  | C54-C55-C56 | 119.8(4) |
| C25-N26-H26 | 112.6(19) | C54-C55-H55 | 120.1    |
| C27-N26-H26 | 123.4(19) | C56-C55-H55 | 120.1    |
| N26-C27-C32 | 119.0(3)  | C51-C56-C55 | 121.0(4) |
| N26-C27-C28 | 120.4(3)  | C51-C56-H56 | 119.5    |
| C32-C27-C28 | 120.5(3)  | C55-C56-H56 | 119.5    |
| C29-C28-C27 | 119.1(3)  | C66-C61-C62 | 119.0(3) |
| C29-C28-H28 | 120.5     | C66-C61-N1  | 123.2(3) |
| C27-C28-H28 | 120.5     | C62-C61-N1  | 117.6(2) |
| C28-C29-C30 | 121.0(3)  | C63-C62-C61 | 118.9(3) |
| C28-C29-H29 | 119.5     | C63-C62-C67 | 120.7(3) |
| C30-C29-H29 | 119.5     | C61-C62-C67 | 120.3(3) |
| C31-C30-C29 | 120.3(3)  | C64-C63-C62 | 121.5(3) |
| C31-C30-H30 | 119.8     | C64-C63-H63 | 119.3    |
| C29-C30-H30 | 119.8     | C62-C63-H63 | 119.3    |
| C30-C31-C32 | 120.4(3)  | C63-C64-C65 | 119.1(3) |
| C30-C31-H31 | 119.8     | C63-C64-H64 | 120.5    |
| C32-C31-H31 | 119.8     | C65-C64-H64 | 120.5    |
| C27-C32-C31 | 118.6(3)  | C64-C65-C66 | 120.8(3) |
| C27-C32-C33 | 118.0(3)  | C64-C65-H65 | 119.6    |
| C31-C32-C33 | 123.3(3)  | C66-C65-H65 | 119.6    |
| C34-C33-C32 | 121.5(3)  | C65-C66-C61 | 120.7(3) |
| C34-C33-H33 | 119.2     | C65-C66-H66 | 119.6    |
| C32-C33-H33 | 119.2     | C61-C66-H66 | 119.6    |
| C33-C34-C25 | 120.0(3)  | C68-C67-C62 | 179.3(3) |
| C33-C34-C11 | 122.7(3)  | C67-C68-C71 | 179.4(3) |
| C25-C34-C11 | 117.3(2)  | C76-C71-C72 | 118.6(3) |
| O40-C40-C12 | 123.6(3)  | C76-C71-C68 | 120.9(3) |
| O40-C40-C41 | 115.3(3)  | C72-C71-C68 | 120.5(3) |
| C12-C40-C41 | 121.1(3)  | C71-C72-C73 | 119.9(4) |
| C42-C41-C46 | 118.9(3)  | C71-C72-H72 | 120.1    |
| C42-C41-C40 | 121.7(3)  | C73-C72-H72 | 120.1    |
| C46-C41-C40 | 119.4(3)  | C74-C73-C72 | 120.7(4) |
| C41-C42-C43 | 120.4(3)  | C74-C73-H73 | 119.7    |
| C41-C42-H42 | 119.8     | C72-C73-H73 | 119.7    |
| C43-C42-H42 | 119.8     | C73-C74-C75 | 120.0(4) |
| C44-C43-C42 | 120.3(4)  | C73-C74-H74 | 120.0    |
| C44-C43-H43 | 119.9     | C75-C74-H74 | 120.0    |

## Supporting Information

|             |          |
|-------------|----------|
| C74-C75-C76 | 120.1(4) |
| C74-C75-H75 | 119.9    |
| C76-C75-H75 | 119.9    |
| C71-C76-C75 | 120.7(3) |
| C71-C76-H76 | 119.7    |
| C75-C76-H76 | 119.7    |

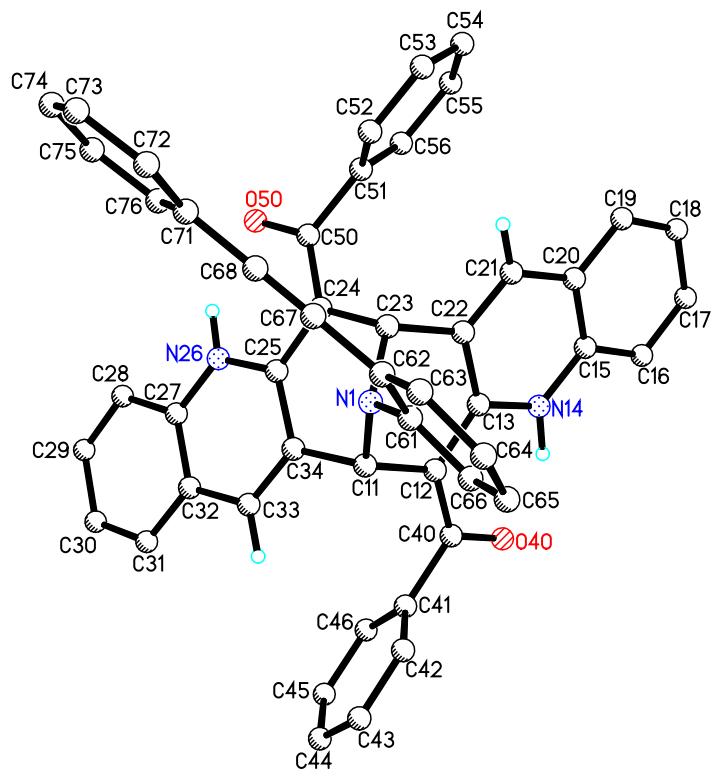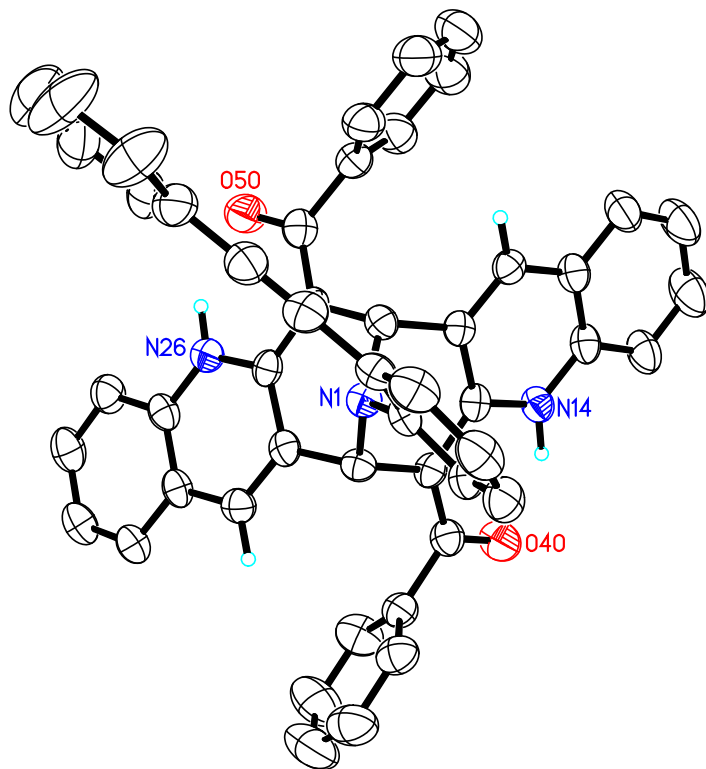

## Supporting Information

Suggestion for a short experimental part:

3e: yellow crystal (hexagonal), dimensions 0.157 x 0.082 x 0.066 mm<sup>3</sup>, crystal system trigonal, space group  $R\bar{3}$ , Z=18, a=39.4459(15) Å, b=39.4459(15) Å, c=12.5093(8) Å, alpha=90 deg, beta=90 deg, gamma=120 deg, V=16856.5(17) Å<sup>3</sup>, rho=1.255 g/cm<sup>3</sup>, T=200(2) K, Theta<sub>max</sub>= 24.108 deg, radiation MoK $\alpha$ , lambda=0.71073 Å, 0.5 deg omega-scans with CCD area detector, covering the asymmetric unit in reciprocal space with a mean redundancy of 5.7 and a completeness of 99.9% to a resolution of 0.89 Å, 34031 reflections measured, 5968 unique (R(int)=0.0717), 3507 observed (I > 2 $\sigma$ (I)), intensities were corrected for Lorentz and polarization effects, an empirical scaling and absorption correction was applied using SADABS<sup>[1]</sup> based on the Laue symmetry of the reciprocal space, mu=0.08mm<sup>-1</sup>, T<sub>min</sub>=0.93, T<sub>max</sub>=0.96, structure solved with SHELXT-2018/2 (Sheldrick 2015)<sup>[2]</sup> and refined against F<sup>2</sup> with a Full-matrix least-squares algorithm using the SHELXL-2018/3 (Sheldrick, 2018) software<sup>[3]</sup>, 502 parameters refined, hydrogen atoms were treated using appropriate riding models, goodness of fit 1.04 for observed reflections, final residual values R1(F)=0.053, wR(F<sup>2</sup>)=0.113 for observed reflections, residual electron density -0.20 to 0.22 eÅ<sup>-3</sup>. CCDC 2249320 contains the supplementary crystallographic data for this paper. The data can be obtained free of charge from The Cambridge Crystallographic Data Centre via [www.ccdc.cam.ac.uk/structures](http://www.ccdc.cam.ac.uk/structures).

Lit. 1: (SADABS-2016/2 - Bruker AXS area detector scaling and absorption correction)  
Krause, L., Herbst-Irmer, R., Sheldrick G.M. & Stalke D., J. Appl. Cryst. 48 (2015) 3-10.

Lit. 2: (SHELXT - Integrated space-group and crystal structure determination)  
Sheldrick G. M., Acta Cryst. A71 (2015) 3-8.

Lit. 3: (program SHELXL-2018/3 (Sheldrick, 2018) for structure refinement)  
Sheldrick G. M., Acta Cryst. (2015). C71, 3-8

Lit. APEX, APEX2, SMART, SAINT, SAINT-Plus:  
Bruker (2007). "Program name(s)". Bruker AXS Inc., Madison, Wisconsin, USA.

### Computational details

Gaussian 16<sup>1</sup> was used to fully optimize all the structures reported in this paper at the M06-2X hybrid functional of Truhlar and Zhao<sup>2</sup> level of theory. For all of the calculations, solvent effects were considered using the SMD solvation model of Truhlar and workers<sup>3</sup> with ethanol as the solvent. For geometry optimizations, the 6-31G(d) basis set was employed for all atoms. This basis set combination will be referred to as BS1. Frequency calculations were carried out at the same level of theory as those for structural optimization. Transition structures were located using the Berny algorithm. Intrinsic reaction coordinate (IRC) calculations were used to confirm the connectivity between transition structures and minima.<sup>4</sup> To further refine the energies obtained from the SMD/M06-2X/6-31G(d) calculations, we carried out single-point energy calculations using the M06-2X functional method for all of the structures with a larger basis set def2-TZVP (BS2).<sup>5</sup> Grimme empirical dispersion was added with the GD3 term on all the single-point energy calculations.<sup>6</sup> A tight convergence criterion and ultrafine integral grid were also employed to increase the accuracy of the calculations. The free energy for each species in the solution was calculated using the equation,

$$G = E(\text{BS2}) + G(\text{BS1}) - E(\text{BS1}) + \Delta G^{1\text{atm} \rightarrow 1\text{M}} \quad (1)$$

where  $\Delta G^{1\text{atm} \rightarrow 1\text{M}} = 1.89$  kcal/mol is the free-energy change for compression of 1 mol of an ideal gas from 1 atm to the 1 M solution phase standard state.<sup>7</sup>

(1) Gaussian 16, Revision C.01, M. J. Frisch, G. W. Trucks, H. B. Schlegel, G. E. Scuseria, M. A. Robb, J. R. Cheeseman, G. Scalmani, V. Barone, G. A. Petersson, H. Nakatsuji, X. Li, M. Caricato, A. V. Marenich, J. Bloino, B. G. Janesko, R. Gomperts, B. Mennucci, H. P. Hratchian, J. V. Ortiz, A. F. Izmaylov, J. L. Sonnenberg, D. Williams-Young, F. Ding, F. Lipparini, F. Egidi, J. Goings, B. Peng, A. Petrone, T. Henderson, D. Ranasinghe, V. G. Zakrzewski, J. Gao, N. Rega, G. Zheng, W. Liang, M. Hada, M. Ehara, K. Toyota, R. Fukuda, J. Hasegawa, M. Ishida, T. Nakajima, Y. Honda, O. Kitao, H. Nakai, T. Vreven, K. Throssell, J. A. Montgomery, Jr., J. E. Peralta, F. Ogliaro, M. J. Bearpark, J. J. Heyd, E. N. Brothers, K. N. Kudin, V. N. Staroverov, T. A. Keith, R. Kobayashi, J. Normand, K. Raghavachari, A. P. Rendell, J. C. Burant, S. S. Iyengar, J. Tomasi, M. Cossi, J. M. Millam, M. Klene, C. Adamo, R. Cammi, J. W. Ochterski, R. L. Martin, K. Morokuma, O. Farkas, J. B. Foresman, and D. J. Fox, Gaussian, Inc., Wallingford CT, 2016.

(2) Zhao, Y.; Truhlar, D. G. The M06 suite of density functionals for main group thermochemistry, thermochemical kinetics, noncovalent interactions, excited states, and transition elements: two



## Supporting Information

new functionals and systematic testing of four M06-class functionals and 12 other functionals. *Theor. Chem. Acc.* **2008**, 120 (1), 215-241.

(3) Marenich, A. V.; Cramer, C. J.; Truhlar, D. G. Universal solvation model based on solute electron density and on a continuum model of the solvent defined by the bulk dielectric constant and atomic surface tensions. *The Journal of Physical Chemistry B* **2009**, 113 (18), 6378-6396.

(4) Fukui, K. The path of chemical reactions-the IRC approach. *Acc. Chem. Res.* **1981**, 14 (12), 363-368.

(5) Weigend, F.; Furche, F.; Ahlrichs, R. Gaussian basis sets of quadruple zeta valence quality for atoms H–Kr. *The Journal of chemical physics* **2003**, 119 (24), 12753-12762.

(6) Grimme, S.; Antony, J.; Ehrlich, S.; Krieg, H. A consistent and accurate ab initio parametrization of density functional dispersion correction (DFT-D) for the 94 elements H-Pu. *The Journal of chemical physics* **2010**, 132 (15), 154104.

(7) Cramer, C. J. *Essentials of computational chemistry: theories and models*; John Wiley & Sons, 2013.

Total potential (E), enthalpy (H) and Gibbs free energies (G) of all structures optimized at the SMD/M06/BS1 level of theory along with the total potential energies calculated by SMD/M06-2X/BS2//SMD/M06-2X/BS1 in dichloromethane.

BS1 = 6-31G(d)

BS2 = def2-TZVP

```
1
E (M062x-SMD/BS1) = -898.588794 au
H (M062x-SMD/BS1) = -898.304186 au
G (M06-SMD/6-31G(d)) = -898.366816 au
E (M062x-SMD/BS2//M062x-SMD/BS1) = -
898.941994 au
C -4.33386200 -2.42999400 -0.09703000
C -2.97526300 -2.22523100 -0.09340600
C -2.45978300 -0.90644300 -0.03611300
C -3.36499800 0.18677300 0.01671300
C -4.76212000 -0.05396000 0.01129700
C -5.23828200 -1.34004700 -0.04439800
H -4.72428600 -3.44224300 -0.14077500
H -2.27611800 -3.05499900 -0.13329500
C -2.80537500 1.48168600 0.07010200
H -5.43861900 0.79537600 0.05155600
H -6.30669500 -1.52968700 -0.04860100
C -1.44302500 1.66019200 0.07077800
C -0.58642200 0.50176800 0.02140300
H -3.45621600 2.35201300 0.10627600
N -1.11274000 -0.72049700 -0.03087100
C 0.85990900 0.60559300 0.03145300
H 1.31732400 1.57849500 0.12945700
C 1.68806700 -0.47616300 -0.04371500
O 1.24415000 -1.73422600 -0.10967700
H 0.23618800 -1.68095200 -0.08083400
C 3.16466600 -0.36667600 -0.03438100
C 3.81724900 0.81166600 -0.41988800
C 3.92931000 -1.47050700 0.36349000
C 5.20539100 0.88759100 -0.38901100
H 3.24419300 1.66505500 -0.76883100
C 5.31816000 -1.39010200 0.39491200
H 3.43019200 -2.38784000 0.65704700
C 5.96019700 -0.21109200 0.02116400
H 5.69965200 1.80426100 -0.69588300
H 5.89938000 -2.25048900 0.71236900
H 7.04404400 -0.14962400 0.04262600
C -0.92785300 3.04779700 0.11118100
H 0.16183400 3.19220200 0.06781400
O -1.65883700 4.01857500 0.18341100
HCOOH
E (M062x-SMD/BS1) = -189.68377 au
H (M062x-SMD/BS1) = -189.64528 au
G (M06-SMD/6-31G(d)) = -189.67344 au
E (M062x-SMD/BS2//M062x-SMD/BS1) = -
189.77829 au
C 0.00000000 0.42083400 0.00000000
H -0.35251200 1.45925400 0.00000000
O 1.16106400 0.09001500 0.00000000
O -1.03089900 -0.42081700 0.00000000
H -0.68881400 -1.33783600 0.00000000
1-O
E (M062x-SMD/BS1) = -1088.28556 au
H (M062x-SMD/BS1) = -1087.96044 au
```

## Supporting Information

G (M06-SMD/6-31G(d)) = -1088.03632 au  
E (M062x-SMD/BS2//M062x-SMD/BS1) = -1088.72950 au  
C -4.82808600 -2.66442500 -0.09534300  
C -3.45430600 -2.63868600 -0.09644000  
C -2.77083000 -1.39911000 -0.03521800  
C -3.52681200 -0.19700300 0.02491200  
C -4.94369900 -0.25381300 0.02412000  
C -5.58324400 -1.46650100 -0.03432300  
H -5.34716000 -3.61697100 -0.14184200  
H -2.86937900 -3.55217800 -0.14205000  
C -2.80532300 1.01431600 0.07541500  
H -5.50343100 0.67627900 0.07019000  
H -6.66719300 -1.51567100 -0.03480400  
C -1.42994800 1.01054600 0.06984900  
C -0.73002900 -0.24997900 0.02311200  
H -3.33799600 1.96163500 0.11024900  
N -1.41081200 -1.39262000 -0.03178900  
C 0.71648500 -0.32904700 0.04115100  
H 1.29083800 0.57751500 0.15673600  
C 1.40348200 -1.50489600 -0.04327800  
O 0.80436200 -2.69519000 -0.12942400  
H -0.18801700 -2.51720500 -0.09926900  
C 2.88194100 -1.58086400 -0.02562500  
C 3.67978200 -0.47285900 -0.34152900  
C 3.49987700 -2.79182200 0.31091200  
C 5.06599800 -0.57309700 -0.30440500  
H 3.22270600 0.46607000 -0.63809200  
C 4.88765300 -2.88763700 0.34805200  
H 2.88817000 -3.65461900 0.55182600  
C 5.67469000 -1.77910200 0.04263900  
H 5.67273700 0.29122900 -0.55633500  
H 5.35458300 -3.83028000 0.61693400  
H 6.75752400 -1.85483300 0.06890900  
C -0.72328700 2.29911800 0.08594100  
H 0.37058100 2.30256800 0.01569400  
O -1.31228300 3.37180200 0.16178500  
C 1.60377800 5.12296200 -0.04237500  
H 2.29521400 5.97457800 -0.07112700  
O 1.96244200 3.96813700 -0.13915200  
O 0.35583100 5.52475600 0.10920900  
H -0.25503000 4.73557600 0.13075600

1-N

E (M062x-SMD/BS1) = -1088.28296 au  
H (M062x-SMD/BS1) = -1087.95713 au  
G (M06-SMD/6-31G(d)) = -1088.03177 au  
E (M062x-SMD/BS2//M062x-SMD/BS1) = -1088.72673 au  
C -4.42404700 -1.78765700 -0.54675200  
C -3.05874900 -1.65091300 -0.46352200  
C -2.49422500 -0.37112000 -0.24523000  
C -3.35036900 0.75311500 -0.11155600  
C -4.75445300 0.58203300 -0.20266200  
C -5.28154100 -0.66736200 -0.41657800

H -4.85579400 -2.76964200 -0.71509100  
H -2.39096300 -2.50172800 -0.56280700  
C -2.73707700 2.00623500 0.10560900  
H -5.39486600 1.45364300 -0.10022400  
H -6.35569200 -0.80418100 -0.48680200  
C -1.36909000 2.11546400 0.17620600  
C -0.56471100 0.92912800 0.04935800  
H -3.34869000 2.90042600 0.19985200  
N -1.13664700 -0.25682300 -0.15044100  
C 0.88442000 0.97676900 0.13897300  
H 1.34462500 1.84144800 0.59532500  
C 1.71562700 0.00363300 -0.32311100  
O 1.30385600 -1.14135500 -0.88731500  
H 0.31797400 -1.17380600 -0.85438200  
C 3.19019200 0.10747400 -0.25352700  
C 3.83520000 1.34966400 -0.19596500  
C 3.95921800 -1.06313500 -0.25025600  
C 5.22185700 1.41641600 -0.11636000  
H 3.25652300 2.26727600 -0.23926300  
C 5.34646600 -0.99177100 -0.16896000  
H 3.46547000 -2.02793300 -0.29985600  
C 5.98132600 0.24685400 -0.09981700  
H 5.71123800 2.38472600 -0.07864200  
H 5.93217300 -1.90585300 -0.15896900  
H 7.06405600 0.30189000 -0.03997200  
C -0.78506000 3.46818100 0.32992500  
H 0.30492200 3.56795300 0.21254100  
O -1.46283600 4.45394600 0.55123600  
C -0.01229300 -3.39606600 1.06162500  
H 0.36649300 -4.17069100 1.74034000  
O -0.21015700 -3.57390500 -0.12070000  
O -0.22171600 -2.25741800 1.70394000  
H -0.55024800 -1.57755900 1.05935900

H<sub>2</sub>O

E (M062x-SMD/BS1) = -76.38523 au  
H (M062x-SMD/BS1) = -76.36021 au  
G (M06-SMD/6-31G(d)) = -76.38166 au  
E (M062x-SMD/BS2//M062x-SMD/BS1) = -76.43881 au  
O 0.00000000 0.00000000 0.12019800  
H 0.00000000 0.75987200 -0.48079100  
H 0.00000000 -0.75987200 -0.48079100

A

E (M062x-SMD/BS1) = -1109.67773 au  
H (M062x-SMD/BS1) = -1109.29416 au  
G (M06-SMD/6-31G(d)) = -1109.36816 au  
E (M062x-SMD/BS2//M062x-SMD/BS1) = -1110.10443 au  
C 5.93613900 -0.24485700 -0.07955000  
C 4.78916900 0.51209200 -0.05909000  
C 3.52334400 -0.12427400 -0.04420300  
C 3.46081700 -1.54035500 -0.05143000  
C 4.65818300 -2.29714400 -0.07282300

## Supporting Information

C 5.87505600 -1.66012400 -0.08645300  
H 6.90469300 0.24576800 -0.09044600  
H 4.82506700 1.59739200 -0.05320500  
C 2.17311400 -2.12469200 -0.03768300  
H 4.59208200 -3.38177900 -0.07814800  
H 6.79441300 -2.23646700 -0.10252300  
C 1.03181300 -1.35653400 -0.01764500  
C 1.18269600 0.08499700 -0.00573700  
H 2.08988300 -3.20979600 -0.04685400  
N 2.39571600 0.63499200 -0.02047300  
C 0.04883900 0.98421800 0.02570300  
H -0.93476200 0.54812700 0.08350100  
C 0.17078700 2.34325300 -0.00015400  
O 1.34818600 2.97505900 -0.02907300  
H 2.05163400 2.24893100 -0.01687600  
C -0.99647500 3.25357300 0.02110000  
C -2.27280400 2.81649300 -0.35844900  
C -0.82378600 4.58362100 0.42406800  
C -3.35423400 3.68940200 -0.31874300  
H -2.42000700 1.79861000 -0.70694900  
C -1.90914800 5.45395900 0.46431100  
H 0.16256100 4.92937600 0.71466000  
C -3.17714400 5.00980500 0.09494200  
H -4.33690800 3.34039300 -0.62092000  
H -1.76335600 6.48085600 0.78555600  
H -4.02328100 5.68975900 0.12298700  
C -0.23601300 -2.10164700 -0.01317000  
H -0.09686400 -3.19058800 0.00761100  
N -1.40657100 -1.59336500 -0.05199800  
C -2.51701900 -2.46330500 0.00091200  
C -3.63096300 -2.14619100 -0.78545100  
C -2.56170600 -3.58603600 0.83737800  
C -4.75465400 -2.96518600 -0.77000300  
H -3.59345800 -1.26046200 -1.41320300  
C -3.69619100 -4.39332400 0.85884600  
H -1.72096000 -3.80595500 1.48923100  
C -4.79186800 -4.09228200 0.05181200  
H -5.60796400 -2.71810700 -1.39456500  
H -3.72532300 -5.25690100 1.51678600  
H -5.67466600 -4.72379400 0.07230300

### AB

E (M062x-SMD/BS1) = -2197.99629 au  
H (M062x-SMD/BS1) = -2197.28652 au  
G (M06-SMD/6-31G(d)) = -2197.40917 au  
E (M062x-SMD/BS2//M062x-SMD/BS1) = -  
2198.86332 au  
C 3.32043000 4.14727600 1.47808600  
C 2.00716500 3.77287600 1.63073200  
C 1.65838800 2.39966200 1.61990300  
C 2.68787300 1.42754600 1.48776600  
C 4.03442700 1.84289800 1.32719700  
C 4.34442400 3.17988000 1.31645500  
H 3.58055000 5.20177300 1.47438200  
H 1.21631300 4.50819000 1.74396900  
C 2.30281700 0.07108600 1.55049600

H 4.80441800 1.08393700 1.21564800  
H 5.37253300 3.50364000 1.19133800  
C 0.97711800 -0.27367300 1.68634200  
C -0.01895100 0.76978100 1.70116000  
H 3.05788800 -0.71135000 1.49852500  
N 0.34842000 2.04912100 1.71191000  
C -1.43354500 0.47679700 1.61939400  
H -1.75804300 -0.55223400 1.55372000  
C -2.38126500 1.44037900 1.43316000  
O -2.11177000 2.74738100 1.41858700  
H -1.11272500 2.83196400 1.53355200  
C -3.79859700 1.11207800 1.16539500  
C -4.38812200 -0.04887400 1.68051600  
C -4.55920900 1.96978300 0.36017100  
C -5.71356400 -0.35156400 1.38577300  
H -3.81630200 -0.70580200 2.32934200  
C -5.88255000 1.65808500 0.06031000  
H -4.10529300 2.87161200 -0.03818500  
C -6.46261200 0.49716400 0.57109500  
H -6.16295200 -1.25113500 1.79545300  
H -6.46203600 2.32386400 -0.57213300  
H -7.49665700 0.25834300 0.34097600  
C 0.63548900 -1.70088100 1.78108000  
H -0.42045100 -1.99676200 1.81574800  
O 1.50000200 -2.56874000 1.82895300  
C -0.58894100 -5.12792100 1.24382900  
H -0.96064500 -6.11316600 0.93441400  
O -1.30689300 -4.23394500 1.64001800  
O 0.72494300 -5.05117700 1.13088000  
H 1.02281400 -4.14564500 1.43122800  
C -4.77988600 -2.46697200 -1.46551600  
C -4.01324200 -1.32991900 -1.54235900  
C -2.60007200 -1.42544400 -1.48200400  
C -1.99505600 -2.70172100 -1.33630500  
C -2.81209800 -3.85900700 -1.26419200  
C -4.17840100 -3.74373900 -1.33002000  
H -5.86254700 -2.38917300 -1.50500500  
H -4.46298600 -0.34487600 -1.63817700  
C -0.58430600 -2.74444200 -1.26615200  
H -2.33451500 -4.82964800 -1.15934700  
H -4.80531000 -4.62793800 -1.27535200  
C 0.16447900 -1.59216600 -1.34633100  
C -0.52747100 -0.33240400 -1.48260100  
H -0.07753500 -3.70000200 -1.15086000  
N -1.85651800 -0.29156300 -1.55361500  
C 0.17482800 0.93648300 -1.50208000  
H 1.25044800 0.95130100 -1.40239700  
C -0.46341000 2.14151400 -1.53177000  
O -1.79214900 2.26800600 -1.57677100  
H -2.16332200 1.32598200 -1.56690200  
C 0.26279300 3.43004700 -1.48033000  
C 1.57819800 3.54646100 -1.94873500  
C -0.37696600 4.55762200 -0.95014900  
C 2.24314600 4.76607400 -1.87753200  
H 2.07474500 2.69035300 -2.39566000  
C 0.29376100 5.77576700 -0.87722800

## Supporting Information

H -1.39643700 4.47177100 -0.58774000  
C 1.60476300 5.88343600 -1.33869500  
H 3.26020700 4.84585900 -2.24945300  
H -0.20907900 6.64207500 -0.45785400  
H 2.12546900 6.83481200 -1.28455600  
C 1.63253500 -1.66106000 -1.24555800  
H 2.19419500 -0.72803800 -1.33741000  
N 2.22742100 -2.76656000 -1.01366700  
C 3.63258400 -2.75961700 -0.88832200  
C 4.47264600 -1.96272300 -1.67773100  
C 4.19396500 -3.61840200 0.06473000  
C 5.85142300 -2.00628600 -1.48857500  
H 4.04741200 -1.33437700 -2.45518400  
C 5.57106400 -3.64546600 0.25783500  
H 3.53308000 -4.24970800 0.65185200  
C 6.40502100 -2.83853500 -0.51669700  
H 6.49597100 -1.39228300 -2.11071400  
H 5.99533700 -4.30489900 1.00905000  
H 7.48068200 -2.86889300 -0.37326000

### TS<sub>AB-B</sub>

E (M062x-SMD/BS1) = -2197.97512 au  
H (M062x-SMD/BS1) = -2197.26723 au  
G (M06-SMD/6-31G(d)) = -2197.38766 au  
E (M062x-SMD/BS2//M062x-SMD/BS1) = -2198.84863 au  
C -5.78990200 2.77840400 -2.13934000  
C -4.41752800 2.72137500 -2.10020700  
C -3.76906700 1.52812500 -1.69402600  
C -4.55456200 0.40281400 -1.33226500  
C -5.96750300 0.48955300 -1.38178800  
C -6.57498500 1.65624000 -1.77795900  
H -6.28248200 3.69458700 -2.45091800  
H -3.80619500 3.57555700 -2.37586400  
C -3.86559600 -0.75839000 -0.90204300  
H -6.55390900 -0.38012300 -1.09735700  
H -7.65748400 1.72468400 -1.81520900  
C -2.49942900 -0.77547900 -0.84217200  
C -1.76971200 0.38828300 -1.27171300  
H -4.42596900 -1.63794800 -0.59429300  
N -2.40875000 1.48745700 -1.66742900  
C -0.31869400 0.39939300 -1.32442200  
H 0.22732400 -0.48133400 -1.02099400  
C 0.41187300 1.44197500 -1.81302300  
O -0.13750600 2.59749700 -2.20033700  
H -1.13278500 2.49239700 -2.07614900  
C 1.88281300 1.39107600 -1.97442100  
C 2.56957900 0.17069500 -2.04860300  
C 2.60477000 2.58664400 -2.08257600  
C 3.94883500 0.15124900 -2.22864800  
H 2.02757800 -0.77018300 -1.99700200  
C 3.98484400 2.56210900 -2.26371900  
H 2.08067100 3.53497400 -2.02074100  
C 4.66070900 1.34547600 -2.34079300  
H 4.46580600 -0.80187700 -2.29333000  
H 4.53204300 3.49671900 -2.34530400

H 5.73636200 1.32723400 -2.48836300  
C -1.80984600 -1.97589200 -0.25029500  
H -0.75814000 -2.06773200 -0.52832900  
O -2.48118600 -3.06850600 -0.16279700  
C -0.09543100 -4.71827200 -1.52635000  
H 0.46286600 -5.61054800 -1.84786100  
O 0.13869000 -3.61289900 -1.98738400  
O -0.99835100 -5.00137700 -0.62393000  
H -1.62019600 -4.15440700 -0.39475400  
C 4.84416500 -4.20871600 -0.08433000  
C 4.65110900 -2.88041100 0.21205800  
C 3.37132200 -2.42410800 0.61429500  
C 2.30295800 -3.35525300 0.70214000  
C 2.53304000 -4.72073000 0.40490700  
C 3.78155600 -5.13988700 0.01449400  
H 5.82589700 -4.55324000 -0.39471100  
H 5.46096900 -2.15987200 0.14701300  
C 1.03675100 -2.86155400 1.10087100  
H 1.70756600 -5.42207000 0.49819800  
H 3.96060700 -6.18492500 -0.21648700  
C 0.88306600 -1.53078100 1.39515600  
C 2.01188500 -0.64182000 1.27615400  
H 0.19792900 -3.54935800 1.19592200  
N 3.19874800 -1.10459000 0.90094600  
C 1.85302200 0.77809600 1.49950500  
H 0.86493800 1.15235700 1.72954400  
C 2.86235300 1.67978500 1.32068300  
O 4.09240200 1.31871000 0.95178600  
H 4.07962000 0.31993500 0.82464800  
C 2.69119800 3.14091000 1.48381800  
C 1.57177200 3.68713000 2.12608000  
C 3.67118500 4.00363600 0.97505300  
C 1.42971500 5.06538200 2.23998000  
H 0.81464400 3.04018700 2.55751400  
C 3.52470100 5.38273100 1.08971100  
H 4.54372800 3.58861100 0.48259200  
C 2.40285800 5.91809700 1.71920900  
H 0.55914600 5.47486200 2.74297500  
H 4.28899400 6.03961600 0.68570200  
H 2.28872700 6.99408000 1.80963200  
C -0.39391800 -1.02836700 1.91628400  
H -0.36931200 -0.42851700 2.83032300  
N -1.53449700 -1.29784300 1.40234700  
C -2.72895400 -0.83720600 2.03466400  
C -2.95151900 0.53122700 2.18641700  
C -3.69485800 -1.77394800 2.39762900  
C -4.15971900 0.96610200 2.72253300  
H -2.19304500 1.23914900 1.86112800  
C -4.89922700 -1.32444800 2.93460600  
H -3.49894100 -2.83133400 2.25903800  
C -5.13420100 0.04020900 3.09415400  
H -4.34283500 2.02960500 2.83934400  
H -5.65572900 -2.04561300 3.22757700  
H -6.07788900 0.38321800 3.50650700

## Supporting Information

B

E (M062x-SMD/BS1) = -2197.98310 au  
H (M062x-SMD/BS1) = -2197.27133 au  
G (M06-SMD/6-31G(d)) = -2197.39155 au  
E (M062x-SMD/BS2//M062x-SMD/BS1) = -2198.85735 au  
C 6.28302600 -2.50970500 -2.21830500  
C 4.90999500 -2.49885000 -2.26592300  
C 4.18801400 -1.43560800 -1.66774800  
C 4.90090500 -0.39155600 -1.02270300  
C 6.31639400 -0.42758900 -0.98998200  
C 6.99574200 -1.46756600 -1.57656600  
H 6.83176800 -3.32543400 -2.67918000  
H 4.35294900 -3.29061300 -2.75787900  
C 4.14095400 0.64017600 -0.41391300  
H 6.84746200 0.37911500 -0.49195200  
H 8.08041500 -1.49579900 -1.55156500  
C 2.77661000 0.61395800 -0.46959200  
C 2.12612800 -0.45473300 -1.17797700  
H 4.64746100 1.44821300 0.10755800  
N 2.82834800 -1.43740400 -1.73473700  
C 0.68216100 -0.48910900 -1.32106200  
H 0.08563700 0.31157700 -0.90876700  
C 0.01267200 -1.45930700 -2.00453800  
O 0.61243500 -2.52323900 -2.54663100  
H 1.59744100 -2.41386900 -2.37114100  
C -1.45404500 -1.42630500 -2.18446600  
C -2.15076000 -0.20993300 -2.21315100  
C -2.16009500 -2.62731200 -2.31366600  
C -3.53451600 -0.20135000 -2.35039500  
H -1.60988700 0.73116200 -2.14584700  
C -3.54567000 -2.61357700 -2.44858000  
H -1.62158100 -3.56953200 -2.29261500  
C -4.23556000 -1.40258000 -2.46570100  
H -4.06609100 0.74561800 -2.37299500  
H -4.08745700 -3.55089200 -2.53412300  
H -5.31669400 -1.39341600 -2.56932600  
C 1.95447100 1.65384900 0.25800900  
H 1.08494800 1.93877300 -0.33715600  
O 2.67303500 2.75677400 0.63574900  
C 0.75289900 4.42259000 -1.45713200  
H 0.36394500 5.28494900 -2.04023900  
O 0.46051300 3.28061100 -1.85136000  
O 1.45414600 4.73760000 -0.44517800  
H 2.20219600 3.57224300 0.22607900  
C -4.36703200 4.85706100 -0.36726200  
C -4.40440000 3.51108700 -0.09089600  
C -3.22921900 2.84563300 0.33509600  
C -2.02690200 3.58937000 0.47062600  
C -2.01784600 4.97801500 0.18723600  
C -3.16890300 5.60026600 -0.22823700  
H -5.26991700 5.36265700 -0.69601300  
H -5.31907000 2.93495300 -0.19254500  
C -0.87583900 2.89801500 0.91012400  
H -1.08781900 5.52781000 0.30403600  
H -3.16786000 6.66235300 -0.45000800

C -0.94934900 1.55203300 1.18746100  
C -2.20199300 0.85435400 1.00280200  
H 0.04615700 3.45362500 1.06637800  
N -3.28197800 1.51099600 0.59838700  
C -2.28923400 -0.57528500 1.19806000  
H -1.37629500 -1.12901800 1.37505300  
C -3.45587200 -1.27600400 1.07094600  
O -4.61634700 -0.69531400 0.76470600  
H -4.42054600 0.27772100 0.59745600  
C -3.54549500 -2.74317900 1.23888700  
C -2.54376600 -3.47206900 1.89309500  
C -4.65582700 -3.42284600 0.72122500  
C -2.64286800 -4.85427900 2.00787600  
H -1.69375000 -2.96151300 2.33476800  
C -4.75101500 -4.80600500 0.83739600  
H -5.43671500 -2.86399800 0.21645500  
C -3.74392300 -5.52605500 1.47751200  
H -1.86187100 -5.40727800 2.52048800  
H -5.61289800 -5.32191500 0.42532600  
H -3.81893900 -6.60537300 1.56896200  
C 0.16219300 0.85411700 1.81631400  
H -0.06377500 0.20458500 2.66246300  
N 1.41336300 0.95160500 1.50900100  
C 2.39033600 0.24848300 2.31386500  
C 2.38790200 -1.14338700 2.30306100  
C 3.33077100 0.98138500 3.02986200  
C 3.35441000 -1.81999200 3.04119700  
H 1.64843700 -1.67857100 1.71236700  
C 4.29282300 0.28849200 3.76160300  
H 3.30550200 2.06482900 3.01107000  
C 4.30653500 -1.10519100 3.76669000  
H 3.36621900 -2.90508700 3.04122800  
H 5.03145400 0.84355600 4.33082500  
H 5.06192600 -1.63633000 4.33711600

TS<sub>B-C</sub>

E (M062x-SMD/BS1) = -2197.96183 au  
H (M062x-SMD/BS1) = -2197.25220 au  
G (M06-SMD/6-31G(d)) = -2197.36610 au  
E (M062x-SMD/BS2//M062x-SMD/BS1) = -2198.83439 au  
C -5.54193700 -2.45583500 1.92506900  
C -4.17155900 -2.51915200 2.01880600  
C -3.37732400 -1.47907100 1.47661200  
C -4.01458600 -0.38380600 0.83999600  
C -5.42754700 -0.34031500 0.76051600  
C -6.17887100 -1.35964700 1.29436800  
H -6.14707800 -3.25658000 2.33932000  
H -3.67368300 -3.35557500 2.50009600  
C -3.17996200 0.58300000 0.22981000  
H -5.89811700 0.50291400 0.26170500  
H -7.26198000 -1.33210100 1.23187400  
C -1.81419900 0.47808800 0.30226600  
C -1.24090200 -0.63982800 1.01260900  
H -3.63259600 1.40216200 -0.32565000

## Supporting Information

N -2.02096800 -1.56927800 1.55470100  
C 0.19409700 -0.83457300 1.08524800  
H 0.84706200 -0.07266300 0.68719800  
C 0.77575400 -1.97179300 1.56197000  
O 0.08029600 -3.01321700 2.02743800  
C 2.24180500 -2.17169400 1.57986000  
C 3.11773800 -1.08538500 1.70563800  
C 2.76565400 -3.46696500 1.49160600  
C 4.49273600 -1.29152600 1.73990200  
H 2.72003600 -0.08097900 1.81774900  
C 4.14304100 -3.66873600 1.51427300  
H 2.09086800 -4.31210900 1.40034300  
C 5.00899600 -2.58376000 1.64150100  
H 5.16157500 -0.44292100 1.84941600  
H 4.53991200 -4.67638900 1.43638700  
H 6.08302400 -2.74374900 1.66419400  
C -1.02406900 1.38933500 -0.55488200  
H -1.61729600 1.87288700 -1.32602500  
C 5.51699000 -1.81765400 -1.68108000  
C 4.15186900 -1.88022400 -1.81174800  
C 3.38435500 -0.69262000 -1.72644300  
C 4.03006800 0.55141900 -1.49404700  
C 5.44098300 0.58094400 -1.35440600  
C 6.16823800 -0.57975900 -1.44972000  
H 6.10793300 -2.72614400 -1.74737400  
H 3.63679200 -2.82043200 -1.98517000  
C 3.21403000 1.70238800 -1.34925000  
H 5.92834600 1.53465000 -1.17158600  
H 7.24826800 -0.55607200 -1.34485100  
C 1.85592600 1.61208700 -1.51096400  
C 1.30216900 0.33834300 -1.84388600  
H 3.67382400 2.65065200 -1.07627600  
N 2.03389200 -0.76267100 -1.88255900  
C -0.14918400 0.22874500 -2.05815500  
H -0.54864400 0.95432500 -2.75535400  
C -0.76239900 -1.05227700 -2.07646900  
O -0.09123400 -2.12733300 -1.79419200  
C -2.19996900 -1.23547700 -2.28547100  
C -2.99008500 -0.24002400 -2.88034100  
C -2.80435700 -2.40051500 -1.78621700  
C -4.36596300 -0.41430900 -2.97459500  
H -2.53722500 0.66124800 -3.28284000  
C -4.18141200 -2.55959400 -1.87016900  
H -2.19286200 -3.15925900 -1.30867800  
C -4.96272100 -1.56761900 -2.46427100  
H -4.97370800 0.35298800 -3.44311500  
H -4.64775500 -3.45134300 -1.46309700  
H -6.03964500 -1.69225400 -2.52684600  
C 0.90919500 2.73068100 -1.12668300  
H 1.45047600 3.54234000 -0.63026000  
N 0.00721400 2.14187900 -0.08682900  
H -1.78651300 2.70328400 1.77314200  
C 0.28377200 2.35112100 1.29231700  
C 1.59503600 2.35269000 1.77424200  
C 1.83889500 2.61158500 3.12145700  
C 0.78421000 2.86085800 3.99533000

C -0.52239300 2.87660600 3.50785100  
C -0.77507200 2.63989300 2.16157100  
H 2.42434300 2.13836400 1.10855700  
H 2.86181600 2.60615800 3.48533600  
H 0.97819300 3.05389500 5.04560800  
H -1.35120500 3.09739700 4.17337100  
C -1.33020000 5.09847800 -0.13739300  
O -1.79836500 4.43767700 -1.11453200  
O -0.13647600 5.34964900 0.09746000  
H -2.09367100 5.49290100 0.57107000  
H -0.89018200 -2.75318100 1.97593800  
O 0.17515800 3.16809700 -2.21381800  
H -0.55430200 3.78093600 -1.85236200  
H 0.91292400 -1.86844700 -1.77761400

TS<sub>B-c</sub>

E (M062x-SMD/BS1) = -2197.94919 au  
H (M062x-SMD/BS1) = -2197.23796 au  
G (M06-SMD/6-31G(d)) = -2197.34945 au  
E (M062x-SMD/BS2//M062x-SMD/BS1) = -  
2198.82009 au  
C -2.52316800 -4.21680600 3.50575200  
C -1.25968900 -3.68063700 3.43487700  
C -1.07187400 -2.39174000 2.88344800  
C -2.19935200 -1.66432800 2.41808700  
C -3.49431100 -2.23561400 2.51447700  
C -3.65033900 -3.49088100 3.04552900  
H -2.66482200 -5.21016000 3.92041500  
H -0.38852400 -4.22422200 3.78663200  
C -1.96759200 -0.40638400 1.82492400  
H -4.34518000 -1.67061500 2.14351200  
H -4.63692100 -3.93814900 3.11028100  
C -0.67311000 0.02606600 1.62526300  
C 0.37963800 -0.72643900 2.23136500  
H -2.81148900 0.20099500 1.51542600  
N 0.18590600 -1.86536500 2.83772100  
C 1.79720500 -0.19812100 2.24568300  
C 2.38533900 -0.31477400 0.81538300  
O 2.30990200 -1.65851500 0.42990600  
C 3.87068600 0.05029700 0.83742800  
C 4.33689900 1.14264400 1.57755000  
C 4.78919700 -0.69641900 0.09567200  
C 5.68543000 1.49136900 1.55930300  
H 3.65262800 1.73320700 2.18049700  
C 6.13915300 -0.34768600 0.07781300  
H 4.44901200 -1.56271000 -0.46047200  
C 6.59268700 0.74854900 0.80617900  
H 6.02621700 2.34173900 2.14241000  
H 6.83707800 -0.94136500 -0.50528100  
H 7.64426800 1.01855200 0.79369700  
C -0.42873800 1.30294800 0.96776600  
H -1.12318900 2.09851900 1.21469600  
C 0.02916900 -3.53882800 -4.85315300  
C -0.75994900 -2.66080900 -4.15274200  
C -0.16657900 -1.72970600 -3.26015500

## Supporting Information

C 1.23925400 -1.73525000 -3.08787300  
C 2.03529400 -2.63842900 -3.83846000  
C 1.43987800 -3.52323700 -4.70252600  
H -0.42532100 -4.25309900 -5.53314000  
H -1.84076300 -2.65300700 -4.25758900  
C 1.76915800 -0.85484100 -2.11789400  
H 3.11348900 -2.62754200 -3.70164500  
H 2.04546300 -4.22247800 -5.27066300  
C 0.94604400 -0.05457600 -1.36232000  
C -0.44566300 -0.02481400 -1.71664500  
H 2.84224600 -0.85392500 -1.94592400  
N -0.96109200 -0.83382000 -2.62082300  
C -1.38900500 0.98548400 -1.18635800  
H -1.11006000 2.02169100 -1.33623200  
C -2.71670100 0.72745200 -0.94371200  
O -3.24256600 -0.46548500 -0.77512700  
C -3.68607100 1.83227000 -0.72129400  
C -3.49390100 3.10425700 -1.27907400  
C -4.82825700 1.59749700 0.05599700  
C -4.40993000 4.12350300 -1.03973600  
H -2.64225400 3.29622700 -1.92511400  
C -5.74104500 2.62007400 0.29598900  
H -4.99531900 0.60990400 0.47389300  
C -5.53288100 3.88634800 -0.24747600  
H -4.25199200 5.10170500 -1.48348300  
H -6.61721000 2.42606900 0.90704800  
H -6.24689500 4.68317100 -0.06291800  
C 1.62799200 0.67775600 -0.20883100  
H 2.41390900 1.27275800 -0.66568600  
N 0.73611600 1.67504100 0.45203300  
H -1.13564100 3.64580600 0.04043200  
C 0.96312600 3.07459800 0.15833100  
C 2.27503900 3.55044600 0.08020300  
C 2.51467800 4.89531300 -0.18164600  
C 1.45726900 5.78116400 -0.36932800  
C 0.15208800 5.30756000 -0.28210800  
C -0.10172900 3.96476600 -0.01690900  
H 3.11949900 2.89087800 0.24318500  
H 3.54042600 5.24598600 -0.23201200  
H 1.64847100 6.82869600 -0.57799900  
H -0.68801500 5.97984800 -0.42510700  
C -1.16742100 -3.19757600 -0.55289700  
O -2.32304300 -2.77092800 -0.84036600  
O -0.22611000 -2.54860600 -0.06535400  
H -1.00104600 -4.27590300 -0.76062100  
H -2.63536800 -1.32022000 -0.83264200  
H 1.78760500 0.84755700 2.56996300  
O 2.58872200 -0.92557000 3.14466000  
H 2.17101800 -1.80550200 3.22005100  
H 1.37945000 -1.93736700 0.26682400

C  
E (M062x-SMD/BS1) = -2198.00270 au  
H (M062x-SMD/BS1) = -2197.28878 au

G (M06-SMD/6-31G(d)) = -2197.40442 au  
E (M062x-SMD/BS2//M062x-SMD/BS1) = -2198.87452 au  
C 4.99109900 -3.44490900 -2.10945100  
C 3.62967600 -3.29769700 -2.22161600  
C 2.98484000 -2.19169800 -1.61243000  
C 3.76098400 -1.24757100 -0.89495700  
C 5.16241900 -1.42460800 -0.79140300  
C 5.76720700 -2.50375500 -1.38900200  
H 5.48177000 -4.29360000 -2.57630600  
H 3.02435000 -4.01332700 -2.77004000  
C 3.06490100 -0.19939100 -0.24253500  
H 5.74076800 -0.69840400 -0.22603200  
H 6.84064600 -2.64295300 -1.30959800  
C 1.70245300 -0.09064100 -0.32602800  
C 0.99949500 -1.05007000 -1.13891200  
H 3.62970000 0.49158800 0.38171600  
N 1.63521500 -2.06142500 -1.72464500  
C -0.44212200 -0.98578600 -1.28825600  
H -0.94341700 -0.08573000 -0.96743000  
C -1.19498500 -2.01304000 -1.76781600  
O -0.67351200 -3.16738800 -2.19962800  
C -2.67291300 -1.96842000 -1.80220700  
C -3.36359000 -0.75107000 -1.86679000  
C -3.39811100 -3.16550800 -1.75688600  
C -4.75437900 -0.73422400 -1.87658100  
H -2.81521000 0.18465300 -1.93635000  
C -4.78968600 -3.14379400 -1.75637000  
H -2.86663500 -4.11050400 -1.71229400  
C -5.47135200 -1.92934000 -1.81586500  
H -5.27963500 0.21424100 -1.93773900  
H -5.34243200 -4.07724800 -1.71002500  
H -6.55740200 -1.91276200 -1.81740200  
C 0.98961000 0.89577500 0.58920500  
H 1.76947300 1.40865200 1.16754900  
C -5.78012700 -1.55101200 1.63414700  
C -4.41839300 -1.72488200 1.71912000  
C -3.58590700 -0.60657000 1.52352600  
C -4.11939800 0.66643200 1.22192200  
C -5.52638600 0.80722800 1.14554500  
C -6.33829000 -0.28073400 1.35460000  
H -6.43745600 -2.40176600 1.78214700  
H -3.97579900 -2.69281000 1.93449200  
C -3.21414800 1.72801500 0.96572500  
H -5.94035600 1.78429300 0.91538300  
H -7.41639900 -0.17388400 1.29672000  
C -1.86157100 1.53169400 1.06247600  
C -1.36838100 0.26319400 1.43768500  
H -3.60550400 2.70251200 0.68282300  
N -2.22107700 -0.73369900 1.62500200  
C 0.11134400 0.14586600 1.68857800  
H 0.25032500 0.73405300 2.60495700  
C 0.64786000 -1.25618700 1.96358800  
O -0.01981000 -2.25316100 1.73152400  
C 2.03961900 -1.38144400 2.47370200  
C 2.69663700 -0.34451400 3.14486700

## Supporting Information

C 2.71724500 -2.57552500 2.19651100  
C 4.02507700 -0.50352000 3.52986700  
H 2.18347800 0.58361100 3.37937000  
C 4.04829300 -2.72185000 2.56545500  
H 2.19899200 -3.36651800 1.66273900  
C 4.70327300 -1.68423100 3.23109800  
H 4.53164700 0.29797000 4.05783700  
H 4.57885400 -3.63861300 2.32779900  
H 5.74451900 -1.79678400 3.51779300  
C -0.80962400 2.55700400 0.72061800  
H -1.24752800 3.35940900 0.11983100  
N 0.16075900 1.85474300 -0.13510900  
H 2.79040300 2.60736800 -0.32461900  
C 0.78991700 2.64338400 -1.14020400  
C -0.01268400 3.13607500 -2.17725600  
C 0.52809900 3.95405800 -3.16254600  
C 1.88706700 4.26787300 -3.14686700  
C 2.69403200 3.75773800 -2.13287400  
C 2.15271100 2.95487400 -1.13019700  
H -1.06754200 2.87352700 -2.19697700  
H -0.11178700 4.33546000 -3.95281600  
H 2.31298300 4.89859100 -3.92105400  
H 3.75340600 3.99608500 -2.10783300  
C 0.92753200 5.64090800 0.39222000  
O 1.44367300 4.91612300 1.29423500  
O -0.25587900 5.64472100 0.01027600  
H 1.62924800 6.35652800 -0.09492400  
H 0.32410300 -3.05826700 -2.15933800  
O -0.26255900 3.04744600 1.90786700  
H 0.37175400 3.80578900 1.67804700  
H -1.82496500 -1.65918600 1.82019100

### D

E (M062x-SMD/BS1) = -2198.00587 au  
H (M062x-SMD/BS1) = -2197.29209 au  
G (M06-SMD/6-31G(d)) = -2197.41147 au  
E (M062x-SMD/BS2//M062x-SMD/BS1) = -2198.87310 au  
C 4.82914600 -3.56526700 -2.37543100  
C 3.48037600 -3.33380600 -2.50281100  
C 2.87089300 -2.28081300 -1.77582100  
C 3.66794700 -1.47520000 -0.92595200  
C 5.05393600 -1.73780900 -0.80791600  
C 5.62535200 -2.76433300 -1.52128300  
H 5.29279900 -4.37309800 -2.93350400  
H 2.85861400 -3.94270300 -3.15251200  
C 3.00719600 -0.45345400 -0.19550700  
H 5.64972700 -1.11717500 -0.14355200  
H 6.68779500 -2.96753500 -1.43214500  
C 1.66004800 -0.24685200 -0.31821500  
C 0.92844500 -1.09641700 -1.22634800  
H 3.58975200 0.15065800 0.49900000  
N 1.53283400 -2.06787100 -1.90510200  
C -0.50874600 -0.97571400 -1.37273000  
H -0.99895000 -0.12937100 -0.92014600  
C -1.28692600 -1.92863300 -1.95397000

O -0.79745900 -3.03467900 -2.52796700  
C -2.76367400 -1.85761300 -1.93364100  
C -3.43072000 -0.62743500 -1.88329800  
C -3.50973800 -3.04251100 -1.93152500  
C -4.81942900 -0.58585500 -1.81490100  
H -2.86383800 0.29914000 -1.91837800  
C -4.89793400 -2.99690900 -1.84777700  
H -2.99568900 -3.99714700 -1.97661600  
C -5.55641000 -1.76948700 -1.78545600  
H -5.32727800 0.37336200 -1.78573000  
H -5.46675900 -3.92162900 -1.82984900  
H -6.64007700 -1.73409300 -1.72095400  
C 0.99133600 0.76427600 0.60509900  
H 1.80324800 1.23285600 1.17754500  
C -5.85760300 -1.33648300 1.82997500  
C -4.50226900 -1.54334300 1.92610500  
C -3.59625300 -0.49030100 1.64380200  
C -4.11108500 0.77020400 1.24005900  
C -5.51281800 0.96257500 1.16240900  
C -6.36978800 -0.07071200 1.45442600  
H -6.54578300 -2.14849100 2.04478400  
H -4.09269400 -2.50588100 2.21719700  
C -3.17236200 1.77607200 0.89141800  
H -5.89160500 1.93479600 0.85756000  
H -7.44360100 0.07603700 1.39092100  
C -1.83823600 1.50345000 0.99140600  
C -1.41874500 0.22115400 1.46368600  
H -3.52082100 2.74521300 0.53909000  
N -2.25498600 -0.73510400 1.77422700  
C 0.07203200 0.08927700 1.70843600  
H 0.23814700 0.68777400 2.61050700  
C 0.61150300 -1.31264500 1.97267000  
O 0.06887000 -2.31127300 1.54208200  
C 1.92823400 -1.41965500 2.68345800  
C 2.49276600 -0.37555900 3.42425600  
C 2.64469600 -2.61273500 2.52051100  
C 3.75351000 -0.52844900 3.99762100  
H 1.96238300 0.56055700 3.56872500  
C 3.90623200 -2.75869400 3.08239800  
H 2.20651000 -3.41021700 1.92839200  
C 4.46258000 -1.71481400 3.82373100  
H 4.18223500 0.28300900 4.57721700  
H 4.45978300 -3.68151600 2.93895300  
H 5.44940900 -1.82645100 4.26286100  
C -0.76811000 2.47606600 0.57842000  
H -1.18769800 3.25474000 -0.06313600  
N 0.24707600 1.77129200 -0.15358600  
H 2.89416400 2.47142400 -0.14635500  
C 0.96657300 2.53479500 -1.12026000  
C 0.26013800 3.01184100 -2.23107700  
C 0.89102800 3.80753100 -3.18000400  
C 2.24529600 4.11531200 -3.04884300  
C 2.95899300 3.61333200 -1.96340200  
C 2.32748600 2.82589800 -1.00097100  
H -0.79118800 2.75531000 -2.33570300  
H 0.32607500 4.17828500 -4.03006600



## Supporting Information

H 2.74164100 4.73154700 -3.79210600  
H 4.01527400 3.84106000 -1.85345700  
C 1.20285800 5.68911900 0.10922300  
O 1.67528300 4.98205400 1.12099900  
O 0.08416500 5.58857700 -0.34790300  
H 1.94900400 6.40275800 -0.26439000  
H 0.20322400 -2.96013100 -2.46764400  
O -0.16275200 3.09554000 1.73356500  
H -0.86154300 3.54074700 2.24634700  
H 0.99189000 4.29978900 1.38033500

TS<sub>D-E</sub>

E (M062x-SMD/BS1) = -2197.94951 au  
H (M062x-SMD/BS1) = -2197.23804 au  
G (M06-SMD/6-31G(d)) = -2197.36051 au  
E (M062x-SMD/BS2//M062x-SMD/BS1) = -  
2198.82983 au  
C 0.94372800 5.23126200 -3.31566700  
C 1.33551500 3.91001800 -3.33610800  
C 0.55576800 2.96879200 -2.64283000  
C -0.59880300 3.35544100 -1.93752500  
C -0.97269600 4.71725200 -1.93273900  
C -0.21139500 5.63987000 -2.61366000  
H 1.53392500 5.97010700 -3.84818600  
H 2.22045100 3.58482500 -3.87458700  
C -1.29371700 2.34828400 -1.21426800  
H -1.85763300 5.01488700 -1.37797400  
H -0.49285300 6.68744200 -2.61093400  
C -0.88660700 1.03956000 -1.18918800  
C 0.22164200 0.64281400 -2.01845900  
H -2.14706900 2.66005200 -0.61340300  
N 0.86681000 1.63130700 -2.67188700  
C 0.68093100 -0.70162800 -2.22357900  
H -0.04267500 -1.39269200 -2.63780600  
C 2.03046100 -1.15834200 -2.25365600  
O 2.30915400 -2.27623800 -2.73401600  
C 3.13286200 -0.42284000 -1.51918400  
C 2.92015300 0.60373600 -0.58847300  
C 4.43533500 -0.91178700 -1.68399200  
C 3.97781400 1.11592700 0.15871800  
H 1.92808500 0.99393800 -0.38640000  
C 5.49390100 -0.39833800 -0.94245700  
H 4.60111100 -1.71807200 -2.39039200  
C 5.26655300 0.61391200 -0.01020400  
H 3.78425600 1.89495300 0.89059400  
H 6.49459700 -0.79659100 -1.08162600  
H 6.08685000 1.00440300 0.58507600  
C -1.54327300 0.14980800 -0.12878100  
H -2.59180200 0.44394000 -0.06946200  
C 4.54878500 -0.78497600 3.64542500  
C 3.32891100 -0.16812800 3.49986300  
C 2.40695600 -0.63621500 2.53338600  
C 2.75383400 -1.76340100 1.73637800  
C 4.01912100 -2.38121600 1.90638100  
C 4.90046700 -1.89667000 2.84109400  
H 5.25618800 -0.41589400 4.38172700

H 3.04916000 0.69051200 4.10231500  
C 1.81746900 -2.19731300 0.77298900  
H 4.27431900 -3.23083900 1.27892300  
H 5.87224100 -2.36309000 2.96806800  
C 0.65251400 -1.48123400 0.61288900  
C 0.40047800 -0.35588800 1.45015000  
H 2.02973900 -3.06245400 0.14765500  
N 1.22262200 0.03423000 2.38680300  
C -0.94781300 0.31652000 1.30601100  
H -1.62742300 -0.23626200 1.96423800  
C -0.91625900 1.79383800 1.69206700  
O 0.05997600 2.46779200 1.41552100  
C -2.11854600 2.41272400 2.32288000  
C -3.28343500 1.69385200 2.61826900  
C -2.07076700 3.78841200 2.59125100  
C -4.37975100 2.34321000 3.18007300  
H -3.35318700 0.62948500 2.41806100  
C -3.16363400 4.43161800 3.15555900  
H -1.16723200 4.33960600 2.35130200  
C -4.32054800 3.70809400 3.45131900  
H -5.27912200 1.78003300 3.40755500  
H -3.11783100 5.49570200 3.36488000  
H -5.17630500 4.21016700 3.89251200  
C -0.35086600 -1.90684800 -0.33874800  
H -0.28845800 -2.92392700 -0.72099800  
N -1.49333900 -1.27352700 -0.48796100  
H -4.02808200 -1.03366000 0.23431400  
C -2.60738300 -1.88671000 -1.15101300  
C -2.41283000 -2.74690300 -2.23107900  
C -3.51328200 -3.38669900 -2.79664000  
C -4.79358500 -3.17006800 -2.29433200  
C -4.97544300 -2.30931500 -1.21329800  
C -3.88594600 -1.66675200 -0.63603100  
H -1.42127400 -2.94309700 -2.62559300  
H -3.36081500 -4.05804000 -3.63566800  
H -5.64567400 -3.67396400 -2.73905300  
H -5.96700000 -2.14710000 -0.80311500  
C -2.08925000 -5.16402800 -0.19481300  
O -3.06406500 -4.74090900 0.47849400  
O -0.88422100 -4.84076700 -0.08412900  
H -2.33512200 -5.92393100 -0.97391700  
H 1.63915100 1.34896000 -3.27526500  
O -1.76386500 -2.94314900 2.07517900  
H -0.89419900 -3.35727200 1.96218900  
H -2.32900000 -3.52790400 1.51002600

E

E (M062x-SMD/BS1) = -2121.62575 au  
H (M062x-SMD/BS1) = -2120.93890 au  
G (M06-SMD/6-31G(d)) = -2121.05284 au  
E (M062x-SMD/BS2//M062x-SMD/BS1) = -  
2122.44481 au  
C -1.64176200 0.98547400 5.67517400  
C -0.56506700 1.06451900 4.82858300  
C -0.75998500 1.02932700 3.42264000

## Supporting Information

C -2.07847600 0.91297500 2.90983200  
C -3.17546500 0.83720200 3.80772900  
C -2.95970900 0.87107000 5.16183100  
H -1.48949300 1.01050000 6.74991800  
H 0.45026700 1.15334500 5.20288100  
C -2.22954600 0.88408500 1.50447700  
H -4.17943600 0.74737700 3.40131600  
H -3.79728900 0.80955600 5.84965000  
C -1.12800200 0.94081300 0.68672400  
C 0.14894600 1.06536000 1.30617000  
H -3.23285800 0.82368200 1.08519000  
N 0.32610400 1.12082100 2.60711400  
C 1.38460000 1.23224700 0.44951800  
H 1.59089400 2.30616100 0.40216000  
C 2.60411500 0.52153100 1.00254700  
O 2.50173700 -0.53034400 1.62222200  
C 3.95794100 1.05169300 0.67571800  
C 4.18506300 2.38460500 0.31133800  
C 5.03714600 0.15826100 0.73908300  
C 5.47625900 2.81465900 0.01649300  
H 3.37228900 3.10295000 0.28125100  
C 6.32124400 0.58851700 0.43245300  
H 4.85049600 -0.87398700 1.01908900  
C 6.54176800 1.91881300 0.07154100  
H 5.64862900 3.85151500 -0.25381800  
H 7.15101200 -0.11004300 0.47327100  
H 7.54610800 2.25647100 -0.16573300  
C -1.27647200 0.89340200 -0.82729600  
H -2.14617600 1.49541100 -1.08689300  
C 1.68022000 -5.65693100 -1.75074300  
C 0.57461600 -4.84527600 -1.71733400  
C 0.72596200 -3.44180300 -1.56801100  
C 2.03029800 -2.89425500 -1.45954700  
C 3.15774900 -3.75446400 -1.50633000  
C 2.98445100 -5.10813600 -1.64488800  
H 1.56188200 -6.73094800 -1.85784800  
H -0.43134100 -5.24664200 -1.79483800  
C 2.13356700 -1.49665900 -1.28036200  
H 4.15093200 -3.32199900 -1.41695400  
H 3.84556700 -5.76863300 -1.67129200  
C 1.00264300 -0.72234800 -1.19241400  
C -0.26016900 -1.37195400 -1.32572300  
H 3.12310600 -1.04526200 -1.22585100  
N -0.39078800 -2.66538600 -1.51839900  
C -1.52364300 -0.54104800 -1.37385500  
H -1.77003200 -0.41546700 -2.43409700  
C -2.70999400 -1.19183100 -0.66939300  
O -2.54789300 -1.97252900 0.25033200  
C -4.09384700 -0.78413800 -1.07527500  
C -4.36021200 0.05284000 -2.16596200  
C -5.15935600 -1.25365300 -0.29478200  
C -5.67238800 0.40486000 -2.47299900  
H -3.55788300 0.43540600 -2.78907600  
C -6.46674000 -0.90070400 -0.60224800  
H -4.94396800 -1.89441900 0.55425200  
C -6.72498600 -0.07061900 -1.69432200

H -5.87074900 1.05113000 -3.32214100  
H -7.28545800 -1.26955600 0.00774200  
H -7.74671900 0.20624000 -1.93624000  
C 1.11541400 0.78312400 -1.02812800  
H 1.95812800 1.10786100 -1.64265100  
N -0.09827500 1.42064800 -1.51187900  
H -2.16495700 2.82061900 -2.49072100  
C -0.06732000 2.76257900 -1.93588000  
C 1.12215000 3.51111200 -1.95608000  
C 1.13195800 4.82088100 -2.43259000  
C -0.03063700 5.42549000 -2.89683000  
C -1.21143600 4.68405500 -2.89520600  
C -1.23404200 3.37451900 -2.43240400  
H 2.05750700 3.09007500 -1.60616700  
H 2.06949700 5.36944300 -2.42937500  
H -0.01813000 6.44771100 -3.26045800  
H -2.13120100 5.12209700 -3.27196100  
C 0.34993200 -3.11515100 1.63656600  
O 0.10842400 -1.84601400 1.92673700  
O 1.45345500 -3.59906800 1.51102000  
H -0.58356700 -3.68403500 1.53507500  
H 0.96714700 -1.34575100 1.93506200

F

E (M062x-SMD/BS1) = -1931.92353 au  
H (M062x-SMD/BS1) = -1931.27753 au  
G (M06-SMD/6-31G(d)) = -1931.38084 au  
E (M062x-SMD/BS2//M062x-SMD/BS1) = -  
1932.65169 au  
C -2.33075200 1.07268000 5.37693300  
C -1.45045200 1.64802700 4.49583400  
C -1.46098500 1.26950800 3.12746500  
C -2.39214400 0.29048300 2.68759300  
C -3.29378300 -0.28622800 3.62023200  
C -3.26171600 0.09655000 4.93700600  
H -2.31925300 1.36395400 6.42280300  
H -0.73203900 2.39719700 4.81437500  
C -2.37132500 -0.06154200 1.31754700  
H -4.00059000 -1.03391600 3.27033200  
H -3.94923100 -0.34616600 5.65094000  
C -1.46414900 0.52273900 0.46923900  
C -0.58353700 1.49878900 1.01154400  
H -3.08116600 -0.80106200 0.94877800  
N -0.58146700 1.86430100 2.27484700  
C 0.38601100 2.23566700 0.11831600  
H -0.00222600 3.25650900 0.03453700  
C 1.77431100 2.43164200 0.73546500  
O 2.28590000 3.53466600 0.62674500  
C 2.55538400 1.30596300 1.35147500  
C 2.04598600 0.01803600 1.56078100  
C 3.91450900 1.54502100 1.59232200  
C 2.88679500 -1.01233900 1.96887300  
H 1.00374800 -0.21497100 1.37774800  
C 4.75273000 0.51660200 2.00885500  
H 4.31093200 2.54010200 1.41869900

## Supporting Information

C 4.24245700 -0.76904700 2.18657100  
H 2.47917800 -2.01051300 2.10012300  
H 5.80717500 0.71344400 2.17699100  
H 4.89895700 -1.57924800 2.48996300  
C -1.40226900 0.15956300 -1.00559200  
H -2.42006400 -0.06187900 -1.32590900  
C 5.30066300 -2.63148000 -1.30069100  
C 3.93974000 -2.80437000 -1.26217600  
C 3.07396900 -1.68523800 -1.38315300  
C 3.63732100 -0.39265800 -1.55499900  
C 5.04791000 -0.24315200 -1.60283100  
C 5.86183400 -1.33989700 -1.47262700  
H 5.95929300 -3.48864200 -1.19844800  
H 3.49304900 -3.78512000 -1.12925900  
C 2.74474100 0.70159800 -1.61871500  
H 5.46417400 0.75333800 -1.72661300  
H 6.94099500 -1.22480600 -1.49780100  
C 1.39798200 0.49466500 -1.46586700  
C 0.93260900 -0.84295700 -1.33707100  
H 3.14055700 1.71047700 -1.73069000  
N 1.72885600 -1.88791900 -1.31698500  
C -0.55732400 -1.11359900 -1.31458300  
H -0.82672400 -1.40818200 -2.33420900  
C -0.92675100 -2.23247300 -0.34572000  
O -0.31057900 -2.37296800 0.69668600  
C -2.10629000 -3.09935200 -0.64894400  
C -2.88743900 -2.94888800 -1.80135800  
C -2.44785000 -4.08358300 0.28921100  
C -3.98882700 -3.77496300 -2.01152400  
H -2.65317600 -2.19189200 -2.54314000  
C -3.54284000 -4.90973700 0.07447100  
H -1.84194400 -4.18830500 1.18338600  
C -4.31532400 -4.75598600 -1.07816800  
H -4.59002200 -3.65189200 -2.90671100  
H -3.79760000 -5.67268800 0.80336400  
H -5.17265200 -5.40068500 -1.24690300  
C 0.44774200 1.66349400 -1.34118700  
H 0.82644200 2.45791900 -1.98787200  
N -0.87546400 1.26612000 -1.80585400  
H -3.28546800 0.80484000 -2.85047700  
C -1.77642100 2.24894500 -2.27216400  
C -1.45445200 3.61505700 -2.30185300  
C -2.35115100 4.54583700 -2.82502000  
C -3.58740300 4.15082900 -3.32308400  
C -3.90935600 2.79400300 -3.30824000  
C -3.01962400 1.85567200 -2.80158200  
H -0.50763200 3.97787000 -1.91971300  
H -2.07050200 5.59510000 -2.82945700  
H -4.28383200 4.88106400 -3.72217700  
H -4.85957700 2.45377300 -3.70966200

3

E (M062x-SMD/BS1) = -1931.91997 au  
H (M062x-SMD/BS1) = -1931.27371 au  
G (M06-SMD/6-31G(d)) = -1931.37783 au

E (M062x-SMD/BS2//M062x-SMD/BS1) = -  
1932.65806 au  
C -4.49712900 3.00273500 2.04645200  
C -3.24940900 3.13576500 1.46390000  
C -2.63994300 2.01076000 0.88779600  
C -3.28608800 0.76145300 0.90044900  
C -4.55207700 0.65358400 1.50164700  
C -5.15506900 1.76110600 2.06900600  
H -4.97041500 3.87151700 2.49344000  
H -2.73297000 4.09159700 1.44816900  
C -2.59584600 -0.34781400 0.30214300  
H -5.04157200 -0.31698600 1.51208300  
H -6.13217600 1.67442900 2.53253800  
C -1.34420700 -0.22053200 -0.20149000  
C -0.68493500 1.07678100 -0.23773500  
H -3.09502600 -1.31482500 0.28283300  
N -1.40420800 2.11532900 0.28482600  
C 0.55617300 1.21603500 -0.85219100  
C 1.38028000 2.40360700 -0.87847100  
O 2.25805100 2.55795900 -1.74237500  
C 1.26402600 3.46048200 0.18449000  
C 1.16082000 3.11873700 1.53783900  
C 1.33244600 4.80645900 -0.18640200  
C 1.11317300 4.11628000 2.50728600  
H 1.12368300 2.07063400 1.82491600  
C 1.26478400 5.80325100 0.78323100  
H 1.43079300 5.06289700 -1.23742400  
C 1.15628700 5.45870400 2.13018900  
H 1.04388700 3.84693600 3.55675900  
H 1.30193100 6.84781600 0.48945400  
H 1.10957600 6.23614200 2.88692200  
C -0.56628200 -1.39373000 -0.76706700  
H -1.28382700 -2.16834300 -1.02861300  
C 6.36768300 -2.11398600 1.53960300  
C 5.02578500 -2.41652700 1.67152100  
C 4.09969800 -1.82091800 0.79952200  
C 4.52677200 -0.92109800 -0.19603300  
C 5.89967800 -0.63131300 -0.30643900  
C 6.81127300 -1.21998600 0.54828800  
H 7.08635900 -2.57416000 2.21061400  
H 4.67432400 -3.10666400 2.43302000  
C 3.52343000 -0.32934200 -1.03618700  
H 6.22491000 0.06457800 -1.07487300  
H 7.86866800 -0.99366200 0.45860400  
C 2.21094200 -0.63705700 -0.88955800  
C 1.78900900 -1.59846400 0.10485000  
H 3.82997900 0.39453900 -1.78695600  
N 2.75801700 -2.11381700 0.90213700  
C 0.44138700 -1.96951900 0.22517400  
C 0.01905700 -2.81765900 1.29662200  
O 0.78969200 -3.27232500 2.17533600  
C -1.44027500 -3.15155500 1.45056600  
C -2.13787200 -3.90771200 0.50545900  
C -2.09847400 -2.70204700 2.59855600  
C -3.49149200 -4.18271200 0.69191000  
H -1.62169400 -4.28426800 -0.37442500

## Supporting Information

C -3.45518500 -2.96107700 2.77501400  
H -1.54783200 -2.12857500 3.33945400  
C -4.15511400 -3.69690600 1.81825700  
H -4.02801600 -4.77438600 -0.04373800  
54546700 0.43246800 -2.58830600  
N 0.11032600 -0.96159400 -2.00171700  
H -1.68636600 -2.61006900 -3.01845800  
C -0.76030300 -0.65989000 -3.08067900  
C -0.72985200 0.56352800 -3.76459900  
C -1.57372700 0.78442900 -4.85338900  
C -2.47216200 -0.19108200 -5.27158900  
C -2.51142600 -1.40809500 -4.58978200  
C -1.66537200 -1.64371900 -3.51384300  
H -0.06044300 1.35786400 -3.45208500  
H -1.52822000 1.73999900 -5.36791400  
H -3.13018700 -0.01034400 -6.11562600  
H -3.19733000 -2.18879700 -4.90575700  
H 2.42493100 -2.75589700 1.62870100  
H -1.01200200 3.04959000 0.22676700

D\*

E (M062x-SMD/BS1) = -2121.57554 au  
H (M062x-SMD/BS1) = -2120.89192 au  
G (M06-SMD/6-31G(d)) = -2121.00506 au  
E (M062x-SMD/BS2//M062x-SMD/BS1) = -  
2122.40466 au  
C 5.25994800 1.77787500 2.51091300  
C 3.90758000 1.63155000 2.69720700  
C 3.15620100 0.78708900 1.83846200  
C 3.82573400 0.10489100 0.78927200  
C 5.22318300 0.27182000 0.61771800  
C 5.92715500 1.09175200 1.46453300  
H 5.82936400 2.42896200 3.16745200  
H 3.37909300 2.15648600 3.48710100  
C 3.02791800 -0.66378000 -0.09175300  
H 5.71732600 -0.24985800 -0.19795900  
H 6.99646200 1.22487200 1.33346100  
C 1.66989100 -0.72580600 0.08230100  
C 1.09169500 -0.05661700 1.21960800  
H 3.49890700 -1.14664800 -0.94713200  
N 1.81875100 0.66042000 2.05491200  
C -0.34601500 -0.15049700 1.45603000  
H -0.82586500 -1.10050000 1.27037900  
C -1.15882200 0.86895000 1.83112200  
O -0.82727500 2.13821100 2.03788000  
C -2.62144900 0.63878200 1.97044100  
C -3.13751800 -0.56859500 2.45635800  
C -3.50414900 1.65636200 1.58882100  
C -4.51351700 -0.75509200 2.55781300  
H -2.45889400 -1.35269600 2.78169400  
C -4.87988300 1.46370200 1.68075500  
H -3.09958200 2.58999200 1.20915800  
C -5.38758800 0.25984700 2.16932900  
H -4.90344600 -1.69067500 2.94804900  
H -5.55680700 2.25404900 1.36953900  
H -6.46108300 0.11276100 2.24579400

H -3.96631600 -2.59039900 3.65864100  
H -5.21290000 -3.90062700 1.95562700  
C 1.11151900 0.04446100 -1.66511000  
H 1.  
C 0.83944900 -1.34397400 -1.03274400  
H 1.55632700 -1.69131200 -1.78023200  
C -5.98681700 1.19606500 -1.82191500  
C -4.62678700 1.34631800 -1.96556200  
C -3.75543400 0.29577100 -1.59622500  
C -4.31026700 -0.90369700 -1.06519000  
C -5.71651400 -1.03136000 -0.92506400  
C -6.53950000 -0.00025400 -1.30297900  
H -6.65001400 2.00626600 -2.10928700  
H -4.19256400 2.25859300 -2.36165400  
C -3.41347400 -1.92919500 -0.70586900  
H -6.11932500 -1.95339300 -0.51475000  
H -7.61575200 -0.09298000 -1.19991600  
C -2.06116500 -1.72513900 -0.89291600  
C -1.59828100 -0.48613600 -1.43506500  
H -3.78308800 -2.86539500 -0.29322000  
N -2.40947200 0.47234000 -1.78449200  
C -0.13203200 -0.36827400 -1.78110100  
H -0.07849900 -0.64887200 -2.84041700  
C 0.43494800 1.05807900 -1.65533800  
O -0.12595700 1.91456000 -1.00641400  
C 1.77022800 1.31145800 -2.27953400  
C 2.25294900 0.58024900 -3.36971300  
C 2.58563700 2.27352900 -1.67023200  
C 3.53846700 0.81825500 -3.85107700  
H 1.63532300 -0.16759700 -3.85877700  
C 3.87442000 2.49297600 -2.14117800  
H 2.21714600 2.79986500 -0.79367200  
C 4.35129500 1.76733500 -3.23406800  
H 3.90597000 0.25785300 -4.70497300  
H 4.51244900 3.22095700 -1.64928200  
H 5.35869600 1.93862900 -3.60154700  
C -1.12571300 -2.74665200 -0.52966700  
H -1.49218900 -3.70662100 -0.17222500  
N 0.16048400 -2.59112800 -0.57438100  
H 2.05338800 -3.88040000 -1.96004800  
C 1.03127300 -3.63186200 -0.07554800  
C 0.90384000 -4.02346800 1.25351600  
C 1.74591700 -5.01911500 1.74175300  
C 2.70025000 -5.59816200 0.90828600  
C 2.81659900 -5.18680400 -0.41933700  
C 1.98176300 -4.19412300 -0.92293500  
H 0.16836500 -3.54362200 1.89327900  
H 1.65932400 -5.33244900 2.77690900  
H 3.35753100 -6.37100000 1.29375000  
H 3.55550200 -5.64304900 -1.06983300  
C 0.82054500 4.49373700 0.77350900  
O 1.26363800 3.45303000 1.35263100  
O -0.35862800 4.77405800 0.50885900  
H 1.60753000 5.22746800 0.47989700  
H 0.09407200 2.46327400 1.72611600

## Supporting Information

TS<sub>D<sup>+</sup>-E</sub>

E (M062x-SMD/BS1) = -2121.56701 au  
H (M062x-SMD/BS1) = -2120.88509 au  
G (M06-SMD/6-31G(d)) = -2120.99554 au  
E (M062x-SMD/BS2//M062x-SMD/BS1) = -  
2122.39572 au  
C -2.15243300 -0.68541800 5.51575600  
C -0.98370000 -0.41259300 4.85017700  
C -1.02113200 0.04675400 3.50722900  
C -2.27569900 0.21475200 2.87197000  
C -3.47132800 -0.06464300 3.58263000  
C -3.40829500 -0.50860900 4.87936300  
H -2.12180300 -1.03899700 6.54189400  
H -0.01455200 -0.53706400 5.32344900  
C -2.25671500 0.63632800 1.52450700  
H -4.42537000 0.06680300 3.07859400  
H -4.31976700 -0.73087800 5.42544400  
C -1.07246800 0.84514300 0.85872700  
C 0.14378300 0.74218300 1.62269800  
H -3.20885500 0.76585500 1.01214500  
N 0.14644600 0.35383000 2.88339900  
C 1.47732800 1.16305000 1.11785900  
H 1.60142100 2.22577900 0.94483000  
C 2.58985200 0.37529300 1.14589800  
O 2.58084200 -0.93413300 1.32136800  
C 3.94056400 0.93274100 0.85931500  
C 4.22674700 2.29836400 0.99764500  
C 4.95949800 0.06822800 0.43859300  
C 5.49324400 2.78786300 0.69449300  
H 3.46974600 2.98274200 1.36891600  
C 6.22639300 0.56068000 0.13655300  
H 4.74905700 -0.99258500 0.34914700  
C 6.49622600 1.92205200 0.25867500  
H 5.70088000 3.84719000 0.81146200  
H 7.00399100 -0.12175700 -0.19307600  
H 7.48465200 2.30638600 0.02567800  
C -1.20702600 1.10188500 -0.64480200  
H -2.06007500 1.76383500 -0.78371200  
C 1.75825300 -5.24881000 -2.24959100  
C 0.64061800 -4.45137900 -2.19659900  
C 0.77237700 -3.05992200 -1.97466200  
C 2.07528200 -2.50431900 -1.83446600  
C 3.21337500 -3.34849100 -1.90372200  
C 3.05503100 -4.69691500 -2.09912000  
H 1.65131600 -6.31796500 -2.40533800  
H -0.35873500 -4.86176700 -2.30180200  
C 2.17152600 -1.11686000 -1.61490200  
H 4.19976900 -2.90778600 -1.78783600  
H 3.92161300 -5.34887900 -2.13971500  
C 1.01194100 -0.38102100 -1.48465200  
C -0.24891800 -1.04149400 -1.59399300  
H 3.14609800 -0.63724500 -1.55443000  
N -0.36594400 -2.30894900 -1.87609500  
C -1.48098000 -0.17545700 -1.49457300  
H -1.70400700 0.17657700 -2.50929400  
C -2.69402400 -0.92796600 -0.94282400

O -2.53955300 -1.83321300 -0.14718100  
C -4.06313200 -0.47669400 -1.33796000  
C -4.29418600 0.57111300 -2.23736300  
C -5.15346100 -1.12348300 -0.73950900  
C -5.59768500 0.95764400 -2.53893100  
H -3.47048300 1.09614000 -2.71138100  
C -6.45189300 -0.73801900 -1.04427100  
H -4.96547000 -1.92737400 -0.03517300  
C -6.67537900 0.30369000 -1.94633300  
H -5.76948800 1.76969400 -3.23815300  
H -7.29106600 -1.24564600 -0.57922200  
H -7.69058300 0.60615700 -2.18486300  
C 1.06201600 1.05479200 -1.36702200  
H 1.97955500 1.56503200 -1.64542700  
N -0.02103800 1.78184000 -1.20921800  
H -2.04915300 3.35609600 -1.95144700  
C 0.00743400 3.21722200 -1.28698400  
C 1.18015200 3.92407900 -1.00925700  
C 1.18414600 5.31185900 -1.11521400  
C 0.03343100 5.99676500 -1.49553600  
C -1.12699200 5.28291500 -1.78571100  
C -1.14594900 3.89589300 -1.68696000  
H 2.09153400 3.41675400 -0.71073600  
H 2.09649300 5.85469000 -0.89029900  
H 0.04212600 7.07920400 -1.57117300  
H -2.02574900 5.80293700 -2.10087600  
C 0.62403800 -3.37175600 1.06166800  
O 0.40362400 -2.12542500 1.22541800  
O 1.72127100 -3.94354700 1.07687300  
H -0.29500300 -3.97564400 0.89858700  
H 1.61504100 -1.39942400 1.32257900

## Supporting Information

TS<sub>D-D</sub>\*

E (M062x-SMD/BS1) = -2197.97614 au  
H (M062x-SMD/BS1) = -2197.26606 au  
G (M06-SMD/6-31G(d)) = -2197.38843 au  
E (M062x-SMD/BS2//M062x-SMD/BS1) = -2198.85014 au  
C 5.24279700 -2.44295500 -2.96002800  
C 3.87335400 -2.36357600 -3.04462800  
C 3.15245100 -1.57547200 -2.11338900  
C 3.85945600 -0.87541700 -1.10540900  
C 5.26982700 -0.97506600 -1.03874400  
C 5.95014600 -1.74602200 -1.95057300  
H 5.79250800 -3.04820000 -3.67450000  
H 3.32019200 -2.89479900 -3.81344800  
C 3.09211000 -0.10868900 -0.19079600  
H 5.79645900 -0.43572800 -0.25580100  
H 7.03139800 -1.82544800 -1.90117300  
C 1.72685300 -0.05664000 -0.27574900  
C 1.08510900 -0.79166300 -1.33831100  
H 3.61097000 0.43069500 0.60040800  
N 1.79650900 -1.50823900 -2.20402200  
C -0.35487500 -0.80210100 -1.49727800  
H -0.96135200 -0.23351700 -0.81270900  
C -1.00795400 -1.53975900 -2.43957100  
O -0.38412200 -2.32817500 -3.31877600  
C -2.48322000 -1.56443400 -2.54002800  
C -3.25603400 -0.47375100 -2.12214800  
C -3.12199900 -2.70136000 -3.04898200  
C -4.64429200 -0.53199600 -2.18410600  
H -2.77003400 0.43205400 -1.77036600  
C -4.51133800 -2.75676700 -3.10834000  
H -2.52589200 -3.54480400 -3.38211600  
C -5.27595900 -1.67601800 -2.67148300  
H -5.23324200 0.32257800 -1.86375400  
H -4.99796900 -3.64731500 -3.49429300  
H -6.35979400 -1.72075400 -2.71918800  
C 0.98384300 0.71883600 0.80393800  
H 1.76184500 1.22802800 1.38082200  
C -5.38154900 -2.46220700 2.38393500  
C -4.01149000 -2.41959100 2.47252500  
C -3.30356600 -1.28042800 2.01555500  
C -4.03390900 -0.18645800 1.47564700  
C -5.44828400 -0.25502600 1.39653000  
C -6.10807400 -1.37323700 1.84142700  
H -5.91853300 -3.33955200 2.73123000  
H -3.44093300 -3.24668400 2.88315900  
C -3.29454600 0.93209500 1.02477800  
H -5.99093900 0.58949200 0.98037700  
H -7.19024600 -1.42912100 1.78058000  
C -1.92710700 0.90362200 1.11821700  
C -1.28388900 -0.24193000 1.66792800  
H -3.80741000 1.79401700 0.60211700  
N -1.93923000 -1.28098500 2.11423100  
C 0.21328800 -0.15426400 1.85795600  
H 0.33698900 0.36494700 2.81435900  
C 0.92500500 -1.50830500 1.91537000  
O 0.50493700 -2.45553000 1.28010900

## Supporting Information

C 2.21896400 -1.59502600 2.65722400  
C 2.68574600 -0.58161900 3.50230400  
C 3.01421700 -2.72717400 2.43324800  
C 3.92833300 -0.70561700 4.11947500  
H 2.09292600 0.30705700 3.69451100  
C 4.25418800 -2.84611900 3.04621400  
H 2.64996100 -3.50024100 1.76422100  
C 4.71267300 -1.83398900 3.89159000  
H 4.28274200 0.08152400 4.77732500  
H 4.86713500 -3.72314800 2.86349300  
H 5.68292900 -1.92521800 4.37047700  
C -1.11276000 2.01381900 0.60785100  
H -1.61748300 2.81465100 0.07182200  
N 0.13796000 1.77710300 0.22145400  
H 2.21168400 3.35859800 0.86713100  
C 0.79500400 2.73164200 -0.63223500  
C 0.32558100 2.89384700 -1.93349200  
C 0.92237500 3.84076300 -2.76151400  
C 1.99179000 4.60213900 -2.29325200  
C 2.46631900 4.41703000 -0.99518600  
C 1.86848400 3.48050300 -0.15606000  
H -0.50260200 2.28338900 -2.28410800  
H 0.55499600 3.97715300 -3.77366300  
H 2.45839600 5.33795000 -2.94084800  
H 3.29602200 5.01250900 -0.62747700  
C -0.74126400 5.57424100 0.28923600  
O -0.19521600 5.28932400 1.40236600  
O -1.66303900 4.96204000 -0.27280400  
H -0.33486600 6.48122000 -0.20676700  
H 0.60168100 -2.23596800 -3.12581600  
O -0.96956500 3.04648000 2.20980100  
H -1.88001200 3.16490200 2.53793200  
H -0.66297400 4.00630800 1.88097400

### NH<sub>2</sub>-Ph

E (M062x-SMD/BS1) = -287.478497 au  
H (M062x-SMD/BS1) = -287.353394 au  
G (M06-SMD/6-31G(d)) = -287.389075 au  
E (M062x-SMD/BS2//M062x-SMD/BS1) = -287.597891 au  
C 0.93797100 -0.00007000 -0.01016200  
C 0.22189500 -1.20669600 -0.00498500  
C -1.16913100 -1.20091100 0.00349300  
C -1.87823200 0.00008000 0.00738600  
C -1.16899500 1.20099900 0.00354400  
C 0.22202200 1.20661800 -0.00503200  
H 0.76809100 -2.14676700 -0.00792800  
H -1.70295000 -2.14729200 0.00976600  
H -2.96351900 0.00005400 0.01528800  
H -1.70261800 2.14748300 0.00987200  
H 0.76834300 2.14662000 -0.00812600  
N 2.33053600 -0.00001100 -0.08291400  
H 2.76288600 0.83515600 0.29814200  
H 2.76283300 -0.83529800 0.29792000

TS'<sub>AB-B</sub>

## Supporting Information

E (M062x-SMD/BS1) = -2197.94849 au  
H (M062x-SMD/BS1) = -2197.24188 au  
G (M06-SMD/6-31G(d)) = -2197.35816 au  
E (M062x-SMD/BS2//M062x-SMD/BS1) = -2198.82121au  
C 6.31949000 1.42498400 1.23672900  
C 5.03616800 1.91496000 1.18865800  
C 3.94195900 1.01896300 1.09460700  
C 4.18901700 -0.37520500 1.05963900  
C 5.51978600 -0.85471700 1.11730700  
C 6.56742800 0.03087500 1.20159500  
H 7.15698000 2.11304500 1.30119100  
H 4.83360200 2.98165500 1.21182300  
C 3.07000200 -1.22607900 0.87907700  
H 5.69260500 -1.92712200 1.07987300  
H 7.58926200 -0.33283200 1.23970100  
C 1.80259800 -0.72041500 0.74737900  
C 1.63375400 0.71113100 0.83713400  
H 3.24079100 -2.29720700 0.79404100  
N 2.67960500 1.51546700 1.00644900  
C 0.33622900 1.34158700 0.69476100  
H -0.53789600 0.71863200 0.56764800  
C 0.15010900 2.68889900 0.64982700  
O 1.14452100 3.58210700 0.71530200  
C -1.19408800 3.28544900 0.50466500  
C -2.30523500 2.66823700 1.09092100  
C -1.36237100 4.48028000 -0.20486700  
C -3.56934200 3.23391300 0.96353700  
H -2.16956300 1.76017200 1.67124300  
C -2.63203400 5.03498400 -0.34348800  
H -0.49983600 4.96482000 -0.65219000  
C -3.73679700 4.41579500 0.24220800  
H -4.42344500 2.75115700 1.42998700  
H -2.75855600 5.95640000 -0.90387000  
H -4.72394700 4.85720100 0.14137900  
C 0.74185200 -1.69776200 0.32166400  
H 1.20650600 -2.64971100 0.07676900  
C -4.85193700 1.70969600 -2.01586600  
C -3.49394500 1.51201100 -1.93220400  
C -2.99295000 0.19703000 -1.80959800  
C -3.88858900 -0.90319000 -1.78087500  
C -5.28350800 -0.66635900 -1.86315800  
C -5.75390400 0.61826800 -1.97936200  
H -5.24115200 2.71943700 -2.10512700  
H -2.79479200 2.34415000 -1.94653000  
C -3.32868900 -2.19847700 -1.69628500  
H -5.96086900 -1.51499800 -1.83750300  
H -6.82073600 0.80521300 -2.04481300  
C -1.96671600 -2.37775400 -1.62525500  
C -1.12768200 -1.21987900 -1.63094500  
H -3.98780600 -3.06499400 -1.69228800  
N -1.64596700 -0.00660700 -1.72307400  
C 0.34420300 -1.30933400 -1.49925600  
H 0.72349400 -2.24594900 -1.88869200  
C 1.10490500 -0.17938500 -2.00734400  
O 0.54900400 0.95281600 -2.21543100  
C 2.55406500 -0.25380500 -2.22367400



## Supporting Information

C 3.22594100 -1.48064000 -2.34452800  
C 3.28539800 0.94415600 -2.22269800  
C 4.60958000 -1.50146800 -2.46411200  
H 2.67897400 -2.41802200 -2.35731100  
C 4.67079400 0.91427700 -2.32807700  
H 2.76379700 1.88856700 -2.10209200  
C 5.33295200 -0.30754400 -2.44870800  
H 5.12616800 -2.45040100 -2.56489900  
H 5.23421000 1.84158100 -2.30744300  
H 6.41576000 -0.33076600 -2.52707000  
C -1.46163700 -3.77093100 -1.58098800  
H -2.24831200 -4.53278600 -1.70359200  
N -0.39333500 -1.92469300 1.06652100  
H 0.73355500 -0.66537700 3.18414700  
C -1.03665200 -1.13507700 2.04518400  
C -2.43251200 -1.02923900 1.99141500  
C -3.12253400 -0.33974500 2.98511800  
C -2.42797600 0.27556900 4.02557100  
C -1.03784000 0.17175200 4.07720400  
C -0.34254900 -0.54627400 3.10817100  
H -2.96535100 -1.50576000 1.17351000  
H -4.20555200 -0.27213300 2.93530000  
H -2.96401000 0.82424200 4.79377400  
H -0.48830700 0.63183200 4.89308700  
C -2.31252200 -4.53798100 2.04209500  
O -2.28659300 -4.03985200 0.88054700  
O -1.49836900 -4.35944200 2.96565700  
H -3.17568300 -5.21746400 2.24592200  
H 1.98900700 3.04774900 0.83131300  
O -0.29626800 -4.09496700 -1.45499400  
H -0.92738800 -2.78634400 0.85976300  
H -0.51732900 0.82220800 -1.99402500

## References

Darbandizadeh, S. A., Amiri, K., Rominger, F. and Balalaie, S. Synthesis of Naphthyridine and Azepine Backbones through Formal [4+ 3] and [4+ 2] Annulation via Cascade Ring-Opening/Cyclization Reaction of 2H-Azirines, *Eur. J. Org. Chem.*, **26**, e202201109 (2023); Motaghi, M., Khosravi, H., Balalaie, S. and Rominger, F. Catalytic formal [4+1] isocyanide-based cycloaddition: an efficient strategy for the synthesis of 1H-cyclopenta[b]quinolin-1-one derivatives, *Org. Biomol. Chem.*, **17**, 275-282 (2019).
